# Supplementary material for: The Second Oncogenic Hit Determines the Cell Fate of ETV6-RUNX1 Positive Leukemia
Source: Front Cell Dev Biol. 2021 Jul 15;9:704591. doi: 10.3389/fcell.2021.704591 (PMC8320889; doi:10.3389/fcell.2021.704591)
Supplement: Supplementary file 1 [file Table_1.XLSX]

## Sheet: Comparison 1
Probeset ID	p-value	qvalue(p-value)	t	Mean(B-ALL Cluster 1)	Mean(WT pro-B cells)	FoldChange(B-ALL Cluster 1/WT pro-B cells)	p-value	qvalue(p-value)	t	Mean(B-ALL cluster 2)	Mean(WT pro-B cells)	FoldChange(B-ALL Cluster 2/WT pro-B cells)
1190002N15Rik	0.00197662	0.0222744	-5.21977	2.46345	4.49689	-4.09379
2010007H06Rik	0.00106412	0.0162262	-5.88843	2.06664	4.07206	-4.01505
2010016I18Rik	0.0022056	0.0232891	5.10727	3.16148	-0.729783	14.8384
2010111I01Rik	0.00239872	0.0244058	-5.02224	3.40288	4.92018	-2.86254
2010300C02Rik	0.000115357	0.00553274	-8.85498	-1.86415	2.5036	-20.6453
2900026A02Rik	0.00952389	0.0496716	-3.74874	1.05317	3.94268	-7.41018
4833403J16Rik	0.00936365	0.0495136	3.76316	1.58528	-0.820007	5.2974
4833445I07Rik	0.00343337	0.0299542	-4.66946	2.04663	3.44329	-2.63292
4933412E12Rik	0.00296451	0.0275687	-4.81189	0.484639	1.94483	-2.75144
4933421O10Rik	0.00813018	0.0460024	-3.8843	1.06627	2.13696	-2.10043
4933439C10Rik	0.000174482	0.00649945	-8.22418	0.32964	5.23833	-30.0375
5930430L01Rik	5.06155e-05	0.00429591	-10.2389	-2.11415	3.04309	-35.6848
6030443J06Rik	0.00186308	0.0216498	5.2812	0.699508	-1.09298	3.46413
6720464F23Rik	0.00556436	0.0378388	4.2195	1.77787	-0.0492687	3.54833
9530077C05Rik	0.00128118	0.0177859	-5.68186	-2.59698	0.665598	-9.59696
9930120I10Rik	0.00231951	0.0240502	-5.05614	-0.585247	1.72503	-4.95977
A530032D15Rik	0.000680338	0.013146	6.40938	5.14641	1.01472	17.5292
A530040E14Rik	0.00822714	0.0462389	3.87405	5.48773	2.17223	9.95556
A730011C13Rik	0.00744527	0.0445139	-3.96076	-0.0494574	1.46265	-2.85227
AC117239.2	0.00438407	0.0334289	4.43825	4.17133	2.77386	2.6344
AC132091.1	0.00597367	0.0396823	4.1556	0.0379433	-1.39892	2.70732
AW011738	0.0015692	0.0198784	5.46229	1.61295	-2.66125	19.3492
Abhd18	0.0013917	0.0185146	-5.59151	1.8976	3.33938	-2.71654
Abhd5	0.00145361	0.0189251	5.54441	2.57246	-0.29968	7.32149
Acadl	0.00549269	0.0376801	4.23123	4.14021	3.09162	2.0685
Acp6	0.000737424	0.013928	-6.31303	1.9794	4.02211	-4.12017
Adgrg1	0.00786024	0.0456182	-3.91354	-0.107708	4.7055	-28.1139
Ago4	0.00579493	0.0388939	-4.18288	2.25678	3.85521	-3.02814
Agtrap	0.000924746	0.0154388	-6.04832	2.02872	3.39643	-2.58061
Ajuba	0.000634252	0.0127325	-6.49418	-3.44161	-0.524926	-7.55107
Akap5	6.96511e-05	0.0047041	9.68122	4.00358	0.128619	14.6717
Aldh1b1	4.94968e-06	0.00133366	-15.2863	-1.12963	3.43762	-23.7072
Aldoa	0.00101814	0.0159943	5.93839	6.73196	5.32676	2.64855
Aldoart1	0.00333567	0.0295452	4.69725	1.08772	-0.275612	2.57278
Alpk1	0.00122655	0.0173503	-5.72986	1.71899	4.25043	-5.78147
Amer1	0.00370138	0.0306771	-4.59759	2.71383	4.54549	-3.55945
Amigo2	0.00762226	0.0450021	3.94027	2.21981	0.359603	3.63059
Ammecr1	0.00798277	0.0456822	-3.90013	3.15463	4.86574	-3.27412
Amot	0.00166496	0.0204836	-5.39932	-3.04537	0.871092	-15.0998
Ankrd13d	0.00335285	0.0296327	-4.69229	0.807881	3.53153	-6.60544
Ankrd6	0.000408367	0.0101037	-7.04702	-1.10921	2.52436	-12.4112
Apbb2	0.000549179	0.0117269	-6.67107	-0.606496	2.81441	-10.7101
Arhgap18	0.00677278	0.0424407	-4.04389	2.40881	5.19268	-6.88701
Arhgap35	0.00102738	0.0160076	-5.92814	4.10506	5.74899	-3.12517
Arhgef12	0.00407224	0.0319916	4.50728	5.55427	2.4736	8.46004
Armcx3	0.00460782	0.0342475	-4.39204	1.21175	3.38366	-4.50618
Arpp21	0.00284824	0.0270277	-4.85118	-3.06009	3.1006	-71.5405
Asb7	0.00751088	0.0446458	-3.9531	2.76138	4.14902	-2.61651
Atad1	0.000580762	0.0122453	-6.60195	4.80098	6.22448	-2.68237
Atg101	0.00492706	0.035277	-4.3303	3.00016	4.57681	-2.98276
Atp6v1a	0.00602737	0.039749	-4.14758	4.57078	5.81639	-2.37118
Atp6v1h	0.00285578	0.0270452	-4.84858	3.72264	5.05428	-2.51689
B130055M24Rik	0.00726576	0.0443284	3.9821	2.53828	1.38535	2.22364
B230118H07Rik	0.000260728	0.00801919	-7.64917	-2.61209	2.81054	-42.8918
BC035044	0.000533431	0.0115514	-6.70727	3.98004	6.27055	-4.89229
Bace1	0.00153289	0.019591	-5.48732	-1.72736	0.734301	-5.50852
Bcr	0.000194299	0.0069413	-8.06669	2.44538	6.65267	-18.4722
Bend5	0.00080051	0.0148271	6.21603	3.3095	1.17544	4.38952
Bhlha15	0.00893778	0.0486731	-3.80287	-0.199356	1.78079	-3.94534
Bhlhe40	9.61925e-05	0.00520138	9.14501	3.13799	0.953767	4.54483
Bid	0.000211904	0.00707494	7.94159	4.96323	2.58561	5.19679
Bmp2k	0.0048144	0.0352408	4.35156	5.67705	4.60899	2.09662
Bst1	1.95321e-07	0.000682246	-26.3914	-0.51202	5.37713	-59.2669
Btla	0.00397768	0.0316247	4.5294	6.89192	4.47457	5.34191
C130026I21Rik	0.000477635	0.010893	6.84613	6.93661	1.77633	35.7601
Cacna1b	0.000114883	0.00553274	-8.86145	-2.54839	1.47228	-16.2309
Cacna1d	0.000308586	0.00883663	7.41821	2.77497	0.577121	4.58794
Cacnb3	0.00128509	0.0177859	5.67851	-0.868012	-3.88546	8.09737
Calhm6	0.00161253	0.0201717	5.43327	1.00448	-1.16057	4.48481
Camkmt	0.00345756	0.0300687	4.66271	1.26998	-0.569676	3.57924
Caprin2	0.00176695	0.0210966	-5.33663	0.676418	2.61993	-3.8464
Cbarp	0.00640684	0.0412237	4.09311	1.09885	-2.2625	10.277
Cbll1	0.00115251	0.0167006	-5.79897	2.52259	4.38425	-3.63426
Cbx4	0.000344605	0.00946958	-7.27007	3.20012	5.2368	-4.10298
Ccnd3-ps	0.00392449	0.0315446	-4.54211	-0.995863	1.14637	-4.41446
Ccr9	0.00368675	0.0305937	-4.60136	0.296613	2.97556	-6.40387
Cd180	0.00415384	0.0323103	4.48866	5.59098	3.42072	4.50107
Cd200	0.00895267	0.0486842	3.80144	2.5742	0.562943	4.03133
Cd22	0.00928688	0.0494313	3.77017	7.42021	5.80608	3.06126
Cd247	0.00282069	0.0269028	4.86076	2.95455	0.32345	6.19497
Cd28	0.00788646	0.0456638	3.91065	3.14486	0.277187	7.29887
Cd3d	0.00199101	0.0223239	5.21228	2.58717	-1.43577	16.2565
Cd3e	0.000847479	0.0150991	6.14933	2.5597	-1.88453	21.7693
Cd52	0.00107488	0.0163425	5.8771	7.19634	5.23586	3.89192
Cd6	0.00176828	0.0210966	5.33584	2.6412	-1.558	18.369
Cd69	0.00226636	0.0237066	-5.07964	3.62289	6.6387	-8.08815
Cd74	0.00152226	0.0195157	5.49478	9.58114	6.44578	8.78693
Cd83	1.07393e-06	0.000800075	19.8079	6.51896	0.572141	61.6836
Cd93	5.79869e-05	0.00458372	-9.99797	1.47294	9.17044	-207.576
Cdc14b	0.00872798	0.0478896	3.82321	3.12952	1.30042	3.55316
Cdh24	0.0037956	0.0310491	-4.57371	-0.812979	1.47993	-4.90043
Cdk17	0.00459656	0.0342443	-4.3943	4.52563	6.07256	-2.92194
Cdkl5	0.00513827	0.0362547	-4.29188	-0.345935	2.26506	-6.10927
Cdo1	0.00318446	0.0286601	-4.74212	-1.15275	1.12658	-4.85453
Cecr2	0.000154518	0.0062821	-8.40524	5.04645	9.87062	-28.3282
Cep85l	0.0046713	0.0345685	-4.37939	2.32914	3.44576	-2.16838
Chchd7	0.00844414	0.0469469	-3.85161	1.07192	2.24497	-2.25489
Chst10	0.000123912	0.00565189	8.74301	2.58471	-2.24939	28.5237
Chst15	0.00289273	0.0272177	-4.83593	4.30689	6.5641	-4.78064
Ciita	0.00125328	0.0176168	5.70608	6.57601	4.59778	3.94011
Cisd3	0.00524738	0.0365735	4.27272	1.58829	-0.158707	3.35658
Cited2	0.000487658	0.0109708	-6.81986	2.20049	3.91455	-3.28082
Cldn12	0.00398277	0.0316247	-4.5282	-1.5174	-0.0697511	-2.72764
Clic5	4.85227e-05	0.00418902	-10.3148	0.472458	2.46963	-3.99217
Cmtm7	0.00106159	0.0162262	-5.89111	3.94656	6.44174	-5.63797
Col27a1	1.31954e-06	0.000875146	-19.1303	0.377804	5.2826	-29.9565
Coro7	0.00014447	0.00601661	-8.5069	3.80261	5.70633	-3.74176
Cpne3	0.00406677	0.0319916	-4.50855	3.99035	5.65984	-3.18101
Cpt1a	0.00307977	0.0282336	-4.77462	3.69282	5.81604	-4.35665
Cr2	0.000370378	0.0097771	7.17462	4.39887	-4.0725e-05	21.0962
Creld2	0.0073122	0.0443403	3.97653	4.33816	2.83684	2.83103
Crot	0.00423636	0.0326117	-4.47024	3.63154	5.22807	-3.02415
Cry2	0.00691676	0.0429019	-4.02534	1.67595	2.69308	-2.02389
Crybg3	0.000171092	0.00642277	-8.25319	2.73897	5.23322	-5.63436
Csf3r	0.00489062	0.035277	4.33712	2.17366	-1.27913	10.9494
Csrp1	0.0011424	0.0167006	-5.8088	3.43224	5.53079	-4.28278
Cstf2t	0.00356614	0.0303054	-4.63309	4.63831	5.80825	-2.25001
Ctla4	0.000350452	0.00951327	7.24772	4.08679	-2.68363	109.169
Ctnnal1	0.0058832	0.0393129	-4.16929	1.06418	2.75157	-3.22073
Ctsh	0.000254159	0.00788953	7.68466	5.84764	2.92473	7.58378
Ctsl	8.5606e-05	0.00494818	-9.33553	1.04433	3.55741	-5.70836
Ctss	0.00657377	0.0418984	4.07028	6.68782	5.35269	2.52298
Cxcr5	5.81083e-05	0.00458372	9.9943	6.60516	1.74444	29.0551
Cxcr6	0.000358475	0.00957357	7.21772	1.67069	-3.37074	32.9324
Cyp4v3	0.00767331	0.0450021	3.93446	2.32966	0.372719	3.88239
Cyp51	0.00632424	0.0409701	4.10465	4.92783	2.88083	4.13246
Cysltr1	0.00580654	0.0389329	-4.18108	-1.00933	1.58211	-6.02702
Cysltr2	0.00237828	0.0243826	5.03086	0.544157	-1.441	3.95906
D630030B08Rik	0.000679277	0.013146	-6.41126	0.447231	2.07353	-3.08721
Dap	0.00201665	0.0224612	-5.19907	2.12209	3.5794	-2.74596
Dck	0.00164944	0.0203673	-5.40924	4.64678	6.80239	-4.45558
Ddc	0.000557192	0.0118227	-6.65311	-3.16833	2.32804	-45.1413
Desi1	0.000160951	0.00637642	-8.34409	2.61122	5.69241	-8.46312
Dgke	0.000170225	0.00642277	-8.26072	2.76002	5.20909	-5.46064
Dhrs3	0.00656931	0.0418984	-4.07088	1.31063	2.539	-2.34301
Dio2	0.00325674	0.0289993	-4.72038	-3.67747	0.501179	-18.1091
Dirc2	0.0079113	0.0456781	-3.90793	1.88028	4.28981	-5.313
Dlg4	0.00412496	0.0322729	4.4952	2.33532	-0.472366	7.00159
Dmd	0.00744095	0.0445139	3.96127	3.09236	-1.62987	26.3959
Dmwd	0.00929	0.0494313	3.76988	1.0759	-1.46891	5.83532
Dnajc12	0.000863147	0.0150991	-6.12802	-2.09353	0.845534	-7.66912
Dpp4	8.05499e-05	0.00494818	-9.4364	3.14897	7.58217	-21.6036
Dqx1	0.00635638	0.0411164	-4.10014	-0.575115	1.36378	-3.83411
Dsel	0.00376633	0.031046	-4.58106	-0.072029	2.31428	-5.22818
Dusp6	0.000113656	0.00553274	-8.87839	3.15386	6.75717	-12.1535
E430021H15Rik	0.00118261	0.0170159	-5.77028	1.31005	4.49311	-9.08233
Ebf1	0.000646855	0.0128699	-6.47031	5.96628	8.56557	-6.05986
Eef1b2	0.00798501	0.0456822	3.89989	7.4942	6.35878	2.19683
Efcab7	0.00810695	0.0459794	-3.88677	0.045007	1.193	-2.21606
Egfr	0.000354373	0.00954247	-7.23296	-2.4665	0.850398	-9.96516
Egln3	0.0060409	0.039749	-4.14557	-1.54243	0.982044	-5.75362
Egr2	0.00231976	0.0240502	5.05603	1.57527	0.125537	2.73158
Eif4e3	0.000450378	0.0105587	-6.92092	0.956685	4.06083	-8.59889
Elk3	0.00148042	0.0191256	-5.52472	4.14901	5.69961	-2.92939
Elovl6	4.70412e-05	0.00418902	-10.3709	1.53785	4.85716	-9.98187
Emid1	0.000380503	0.00988867	-7.13918	-1.34233	3.37672	-26.3376
Eno1	0.00308066	0.0282336	4.77435	5.07045	3.79082	2.42777
Enpp1	0.00108745	0.0164868	5.86402	3.4231	1.78479	3.11301
Entpd6	0.00768921	0.0450021	3.93266	3.47909	1.73856	3.34157
Entpd7	0.000265963	0.00810584	-7.62162	2.01437	4.01226	-3.99413
Epb41l5	0.00147115	0.0190578	-5.53148	-0.234342	3.30024	-11.5881
Epha2	5.66722e-07	0.000682246	-22.0628	-2.1433	5.91158	-265.926
Epn2	0.000217792	0.00715831	7.9024	2.98977	-0.17944	8.99557
Erc1	0.0074129	0.0445139	-3.96457	2.24199	3.49462	-2.38276
Exosc8	0.00577421	0.0387937	4.1861	4.57217	3.55745	2.02052
Ezh2	0.00223581	0.0234603	-5.09342	4.28512	6.75814	-5.55207
Fah	0.00050497	0.0111187	6.7759	3.56272	-1.28578	28.8099
Fam162a	0.00130739	0.01789	5.65965	2.68121	1.24261	2.71056
Fam221a	0.000729966	0.013826	-6.32513	-2.83337	0.252433	-8.49024
Fbxw4	0.0065047	0.0415767	4.07964	2.35622	0.792135	2.95689
Fer	0.000418727	0.0102093	7.01458	3.0688	-0.479436	11.6984
Firre	0.00276994	0.0266462	-4.87868	1.39332	3.80523	-5.3218
Fmnl3	0.00502586	0.0358147	4.3121	4.28808	2.98015	2.47586
Fmr1	0.00661847	0.0420634	-4.06427	4.52357	5.79443	-2.41306
Frg1	0.00434383	0.0332515	-4.44684	3.48923	5.03232	-2.91417
Frmd6	0.00664587	0.0421177	-4.06062	1.1993	3.12029	-3.78684
Gabpb1	0.00532833	0.0369457	-4.25879	3.51638	5.23778	-3.29757
Gas7	0.00902783	0.0487765	-3.7943	4.46367	7.6992	-9.41875
Gbp8	0.00112671	0.0167006	5.82425	3.14234	-0.534263	12.787
Gcat	0.00477857	0.0350167	4.35844	0.459783	-1.9189	5.20063
Gfra2	0.000940137	0.0154388	-6.02935	-0.538887	2.6881	-9.36309
Ggct	0.00853062	0.0473492	3.84285	2.97879	1.42439	2.93712
Ggnbp1	0.00378334	0.0310491	4.57678	2.59897	1.24528	2.55565
Gimap3	0.00112284	0.0167006	5.8281	6.40295	2.39677	16.0687
Gimap4	0.000398103	0.0100336	7.08011	7.56051	3.51764	16.4825
Gimap7	4.27024e-06	0.00131329	15.6756	4.8567	0.389314	22.1216
Gimap8	0.00244769	0.0245685	5.00191	6.42032	3.38648	8.18988
Gk5	0.000128591	0.00578661	-8.68547	-0.688258	3.38404	-16.8222
Glrx	0.00210127	0.022909	-5.1568	2.87713	4.49697	-3.07342
Gm10073	0.00663974	0.0421177	4.06143	6.61807	5.29947	2.49425
Gm10260	0.00778133	0.0452505	3.9223	8.1347	6.58506	2.92745
Gm10282	0.00695565	0.0429499	-4.0204	3.96949	5.48599	-2.86095
Gm10420	0.00379039	0.0310491	4.57501	1.94262	0.714715	2.34226
Gm10566	0.00380843	0.0310706	4.57051	0.267037	-0.890206	2.23031
Gm11408	0.00101925	0.0159943	5.93715	3.79539	1.72225	4.20804
Gm11914	0.00181001	0.0214041	-5.31139	-1.72734	-0.315274	-2.66118
Gm11942	0.00443024	0.0336789	4.4285	0.462833	-0.900951	2.57359
Gm12286	0.00488437	0.035277	4.33829	0.646846	-0.551766	2.29519
Gm12568	0.00186055	0.0216498	-5.28261	-0.0121925	1.45736	-2.76936
Gm13142	0.00193634	0.0220548	-5.2411	0.862707	2.68635	-3.53973
Gm13169	0.000285512	0.0084963	-7.52399	2.32437	4.04706	-3.30052
Gm13196	0.00127364	0.0177859	5.68834	1.41143	0.11751	2.45193
Gm13502	0.00361363	0.0305156	4.62045	1.54569	0.0257547	2.86778
Gm15265	0.00466112	0.0345685	-4.3814	-0.320216	1.19188	-2.85224
Gm15421	0.00385194	0.0311611	4.55975	5.35401	4.06599	2.44193
Gm16026	0.00376905	0.031046	4.58037	3.82314	-0.950104	27.3458
Gm16534	0.00264236	0.0257515	-4.92542	-2.8461	2.36606	-37.0694
Gm17322	0.00320853	0.0286843	4.73482	2.0891	-1.86738	15.5246
Gm17494	0.00696121	0.0429499	-4.0197	-1.39878	-0.349727	-2.06917
Gm20594	0.00518936	0.0365106	4.28285	10.0867	6.95401	8.7704
Gm22513	0.00794511	0.0456822	3.90423	6.64425	0.936095	52.2787
Gm23639	0.00557339	0.0378618	4.21803	1.06658	-1.86626	7.63616
Gm25117	0.00165433	0.0203902	5.4061	4.12624	0.899458	9.36174
Gm25394	0.00745314	0.0445139	3.95984	2.22317	-1.4621	12.8639
Gm25791	0.00842312	0.0468689	3.85376	2.52827	0.102986	5.37135
Gm26165	0.00323495	0.0288819	4.72687	2.43189	0.227583	4.60852
Gm36445	0.00899476	0.0487569	-3.79743	0.075012	2.3038	-4.6874
Gm36638	0.00899513	0.0487569	-3.7974	0.322209	2.31313	-3.97491
Gm37042	0.000127116	0.00575885	8.70335	2.65032	-3.55499	73.7873
Gm37065	0.000209692	0.00707494	-7.95663	-0.685867	3.69694	-20.8621
Gm37285	0.00284115	0.0270266	-4.85363	0.29091	2.31839	-4.07692
Gm37570	0.000630926	0.0127038	-6.50058	-0.10534	2.51148	-6.13395
Gm37632	0.00812254	0.045998	-3.88511	-3.47563	0.394168	-14.6192
Gm38228	0.003193	0.0286601	-4.73952	-1.24126	1.11649	-5.12568
Gm38387	0.00290089	0.0272177	-4.83317	0.399942	2.92757	-5.76623
Gm42462	0.00616067	0.0402998	-4.12802	-0.289886	2.20979	-5.65558
Gm42466	4.62025e-05	0.00418902	-10.4035	-0.784792	1.34459	-4.37531
Gm43213	0.00831822	0.0464921	3.86456	1.42173	-0.496305	3.77908
Gm43712	0.00503219	0.0358183	4.31095	3.85934	2.65447	2.30516
Gm43769	0.000947037	0.0154498	-6.02096	-2.80266	1.04956	-14.4422
Gm44078	0.0016358	0.0202736	-5.41805	0.660764	2.646	-3.95929
Gm44104	0.00378721	0.0310491	-4.57581	-2.01099	1.36161	-10.3575
Gm44951	0.00111868	0.0167006	-5.83225	0.0246432	1.60923	-2.99921
Gm45837	0.00409656	0.0321257	-4.50169	2.06158	5.52712	-11.0467
Gm4609	0.00856173	0.047394	3.83972	1.80928	0.789615	2.02744
Gm4705	0.000116736	0.00555119	8.83628	0.389866	-0.782832	2.25433
Gm47828	0.00382643	0.0310984	-4.56604	2.38654	3.51103	-2.18024
Gm5831	0.00438739	0.0334289	4.43754	5.04815	2.55737	5.62083
Gm6166	0.00829476	0.0464571	3.86699	1.29646	-0.828107	4.36072
Gm6311	0.00926799	0.0494313	3.7719	3.47143	2.35251	2.17184
Gm6368	0.00489597	0.035277	4.33611	3.06988	1.65972	2.65766
Gm6377	0.000209613	0.00707494	7.95718	2.96555	-0.517952	11.1851
Gm6545	0.00312252	0.0284374	4.7612	2.16586	-1.78572	15.4719
Gm6576	0.000987423	0.0157506	5.97323	1.70878	0.26385	2.72249
Gm6685	0.00336247	0.0296649	-4.68953	-0.252493	1.36982	-3.07868
Gm7265	0.0079243	0.0456781	3.9065	1.78873	-0.21068	3.99837
Gm9392	0.00499425	0.0356618	4.31788	3.3502	2.34597	2.00587
Gm9797	0.00778059	0.0452505	3.92239	1.84213	0.136681	3.26131
Gmfg	0.00665252	0.0421201	-4.05973	2.48325	5.26639	-6.8835
Gnb4	0.00925899	0.0494313	-3.77273	1.58616	3.6212	-4.09832
Gpat3	3.22062e-05	0.00348295	-11.0786	-0.688382	5.583	-77.2457
Gpr141	0.00733589	0.044355	3.9737	0.437244	-2.48923	7.60249
Gpr171	0.00196909	0.0222269	-5.22372	2.22966	6.15634	-15.2072
Gpr35	0.004163	0.0323373	4.48659	1.38523	-1.23829	6.1625
Gpr55	0.000874793	0.0150991	6.11246	4.42849	-2.11849	93.5058
Gpr68	0.000902249	0.0152545	6.0767	1.79207	-1.10487	7.44844
Gria3	0.000727743	0.013826	-6.32876	-0.093755	3.01112	-8.6032
Gsn	0.00084002	0.0150991	-6.15964	3.02535	4.73986	-3.28185
Gstp1	0.00263268	0.025732	4.92907	3.7323	2.4704	2.39811
Gtf2b	0.00490973	0.035277	-4.33354	3.86716	5.14928	-2.43196
Gzf1	0.00955876	0.0496833	-3.74564	3.12453	4.7278	-3.03832
Gzmb	0.00109666	0.0164868	5.85454	2.69076	-1.61627	19.7945
H13	0.00514216	0.0362547	-4.29119	4.91844	6.38513	-2.76388
H2-Aa	0.004752	0.0348983	4.36358	8.34701	5.75823	6.01588
H2-Ab1	0.00947067	0.0495713	3.7535	7.37953	5.20788	4.5054
H2-DMa	0.00807573	0.0459269	3.89011	4.98938	2.98972	3.99906
H2-DMb2	0.00157426	0.0198784	5.45886	6.28954	2.46495	14.1683
H2-Eb1	0.00204081	0.022543	5.1868	7.63859	3.69883	15.3457
H2-Eb2	0.0095748	0.0496897	3.74421	2.78934	0.765928	4.06543
H2afy	0.00940598	0.0495558	-3.75933	5.50686	7.31121	-3.49272
Hccs	0.00287396	0.027179	-4.84233	2.92496	4.52259	-3.02646
Hcst	0.00205474	0.022597	5.1798	1.60014	-1.24175	7.16956
Hdc	0.00805477	0.0459149	3.89236	0.972294	-1.38161	5.11207
Hectd2	0.00015627	0.0062821	8.3883	0.541074	-1.94563	5.60496
Hibadh	0.00872148	0.0478896	-3.82385	3.93071	5.95819	-4.07691
Hk3	0.000166453	0.00640466	8.29398	1.0619	-0.756396	3.52665
Hlcs	0.00269947	0.0262318	4.90418	3.12372	1.08229	4.11654
Hmces	0.00106481	0.0162262	5.8877	4.20172	2.46794	3.32598
Hmga1	0.00446128	0.0337998	-4.42201	1.73964	5.35549	-12.2597
Hmga1b	0.00255372	0.025292	-4.95943	4.54799	6.47884	-3.81279
Hmgn2	0.00754408	0.0447638	-3.94926	4.67067	5.95947	-2.44324
Hmgn5	2.1375e-05	0.00273894	-11.8942	1.00524	2.70305	-3.24408
Hs3st1	0.0091079	0.0490124	3.78676	1.68797	0.0392985	3.13545
Hsf2	0.0035661	0.0303054	-4.6331	1.36691	3.28917	-3.79017
Hspa12a	0.00249783	0.0249225	4.98156	1.9641	-3.09298	33.2915
Hspe1	0.00932735	0.0494778	3.76647	4.40976	3.18006	2.34517
Icam1	0.00238553	0.0243826	5.02779	5.05767	3.66847	2.61933
Icos	7.97316e-05	0.00494818	9.45342	2.39634	-2.13755	23.1651
Idh1	0.00305591	0.0281454	-4.78221	2.68272	3.99884	-2.48995
Ifi205	0.00175782	0.0210844	5.34207	0.642277	-2.60378	9.48769
Ifih1	0.000941753	0.0154388	6.02738	3.28746	1.16184	4.36388
Ifit1	0.000198404	0.00700159	8.03638	2.90813	-0.149882	8.32825
Ift122	0.00921046	0.049326	-3.77721	1.15768	2.79738	-3.11603
Ift22	0.000940761	0.0154388	-6.02859	1.87018	3.98516	-4.33184
Igtp	0.0082244	0.0462389	3.87434	5.3337	3.40655	3.80305
Ikbke	0.00203463	0.022543	5.18992	3.97089	1.07865	7.42423
Ikzf2	0.00744886	0.0445139	3.96034	3.52951	1.32644	4.60459
Il12rb1	0.00168777	0.0205996	5.38492	1.72624	-1.32474	8.28775
Il17ra	0.00393364	0.0315446	-4.53991	5.33762	7.14613	-3.5028
Il27ra	0.00745384	0.0445139	3.95976	3.45447	0.324389	8.75483
Il4i1	0.000428437	0.0103333	6.98501	3.85129	0.142782	13.0729
Il7r	0.00293056	0.0273288	-4.82318	4.40679	8.00883	-12.1429
Il9r	0.000161669	0.00637642	8.33743	4.15531	-3.30498	176.105
Impdh1	0.00315098	0.0285119	-4.75238	1.76091	4.07059	-4.95775
Inpp5d	0.00733627	0.044355	-3.97365	6.41647	7.4432	-2.0374
Ipmk	0.00348709	0.0300913	-4.65456	3.5813	5.80004	-4.65488
Irf2bp2	0.00603653	0.039749	-4.14622	5.47755	7.49158	-4.03911
Irf7	1.73049e-05	0.00257843	12.3359	3.98142	2.45912	2.87247
Isg15	0.00682972	0.042638	4.0365	2.84394	-0.987976	14.2404
Itga9	2.71163e-05	0.00317311	-11.4144	1.43508	4.97966	-11.6688
Itk	0.00706303	0.0434872	4.00693	3.50721	0.557105	7.72803
Kank2	0.00940858	0.0495558	-3.75909	-0.991183	0.732593	-3.303
Kcnj2	0.00377611	0.0310491	-4.57859	-0.124665	2.60579	-6.63664
Kcnk5	0.00617992	0.0403136	4.12523	3.82475	0.75391	8.40261
Kcnq5	0.00857649	0.0474075	-3.83824	2.67099	4.07591	-2.64802
Kifap3	0.000297348	0.00866834	-7.46855	0.394822	2.1834	-3.45475
Klf12	0.000907446	0.0152875	6.07007	1.92242	-1.1689	8.52278
Klhl42	0.00585672	0.0392301	-4.17334	4.16667	5.92568	-3.38468
Kmo	0.00435054	0.0332515	-4.4454	2.21625	5.04348	-7.09714
Kremen1	0.00531643	0.0369035	-4.26082	1.80068	3.79669	-3.98895
Kynu	0.0094635	0.0495713	3.75414	4.46271	1.69118	6.82829
Lag3	0.00491335	0.035277	4.33286	1.00679	-1.08739	4.26985
Lat	0.00838296	0.046723	3.85787	3.34402	0.878593	5.52292
Lax1	0.000141185	0.00595374	8.54193	5.25726	3.25926	3.99445
Lgals9	0.000111531	0.00553274	-8.90821	2.9096	6.58239	-12.7532
Lin7c	0.0089841	0.0487569	-3.79845	5.09722	6.57243	-2.78026
Lpcat2	0.00806678	0.0459149	3.89107	0.715448	-1.6146	5.02821
Lrig1	0.00930177	0.0494313	3.76881	0.88093	-3.09298	15.7133
Lrrc1	0.00492984	0.035277	-4.32978	1.82028	3.37186	-2.93136
Lrrc49	0.00681604	0.0426321	-4.03827	-1.22153	0.589798	-3.50965
Lrrcc1	0.0076493	0.0450021	-3.93719	3.51388	4.91336	-2.63806
Ly6a	0.000841894	0.0150991	6.15704	6.81973	-1.4569	310.109
Ly6c2	0.00404926	0.0319415	4.51261	4.12029	2.96541	2.22666
Lyst	0.000359812	0.00957357	7.2128	7.31488	5.29596	4.05278
Lzts1	0.00954019	0.0496716	-3.74729	-1.73913	1.0038	-6.69429
Manea	0.000401046	0.0100336	-7.07052	4.50046	6.46579	-3.90501
Map3k12	0.00551814	0.0377288	4.22704	0.793608	-1.50588	4.92284
March1	0.00109152	0.0164868	5.85982	5.67985	1.85681	14.153
Mboat1	0.00314569	0.0285027	4.75402	-0.347783	-3.7817	10.8072
Mcemp1	0.00143691	0.0187807	5.55688	0.747229	-2.07826	7.08854
Mdm1	0.00211735	0.0230136	-5.14898	1.8486	3.78625	-3.83082
Med10	0.00597749	0.0396823	-4.15502	3.38592	5.08602	-3.24922
Mef2b	0.0063727	0.0411647	4.09786	2.24137	-2.89115	35.0786
Meis3	0.000170362	0.00642277	8.25952	1.58824	-2.17936	13.6195
Mif4gd	0.000253032	0.00788953	7.69086	4.85351	2.25868	6.04119
Mmp11	0.000112564	0.00553274	-8.89362	-3.32025	3.23559	-94.0816
Moap1	0.00393779	0.0315446	-4.53891	0.527015	1.86147	-2.5218
Mpi	0.00364016	0.0305348	-4.61348	1.46823	2.75807	-2.44501
Mpp5	0.00536361	0.0371519	-4.25279	3.64974	5.09877	-2.73025
Mprip	0.00492148	0.035277	-4.33134	4.50627	6.86617	-5.13336
Mrip-ps	0.00541735	0.0373697	-4.24374	2.05879	4.41011	-5.10292
Mrs2	0.00797486	0.0456822	-3.90099	4.21679	5.7246	-2.84378
Ms4a4b	0.0081554	0.0460286	3.88162	4.61832	2.0918	5.76177
Ms4a4c	0.00381346	0.0310706	4.56926	2.6641	0.141084	5.74781
Ms4a6b	0.00194564	0.0220588	5.23613	5.31794	2.45954	7.25209
Msh3	0.000203532	0.0070413	-7.99953	4.11493	5.90347	-3.45464
Myl4	1.67669e-06	0.000936849	-18.3707	0.248675	6.11031	-58.1472
Myof	0.00877412	0.0480249	3.81869	3.10557	0.97365	4.38301
Nab2	0.00020373	0.0070413	7.99812	3.42222	-0.15715	11.9536
Nck2	0.00759009	0.0449175	-3.94396	1.5181	3.98405	-5.52492
Neb	0.00201348	0.0224612	5.2007	2.07715	-0.677998	6.75121
Nfatc2	0.00216068	0.0232169	5.12826	3.10427	-0.322468	10.7535
Nim1k	0.00219911	0.0232891	-5.11027	-3.31009	-0.317518	-7.95893
Nmral1	0.000329305	0.00919995	-7.33072	2.93216	5.40211	-5.54024
Nod1	0.00340985	0.0299093	4.67606	3.89243	1.10168	6.91991
Notch1	0.00310987	0.0283696	-4.76515	4.03844	6.25336	-4.64254
Nphp3	0.00940585	0.0495558	-3.75934	-1.51018	0.541089	-4.14469
Nt5e	2.04645e-05	0.00273894	11.984	3.80852	-1.6673	44.5025
Ntn1	0.00112356	0.0167006	-5.82738	-2.9489	-0.476461	-5.5498
Nup210	0.0011626	0.0168001	-5.78925	6.57069	8.05038	-2.78888
Oas3	0.000375209	0.00986578	7.15758	3.34843	0.272627	8.4316
Oasl2	0.00294965	0.0274686	4.81681	3.05911	0.455092	6.07977
Olfml2b	0.00455599	0.0340744	-4.40252	-3.01465	1.40597	-21.4162
Optn	0.00167027	0.0205113	5.39595	4.09113	1.56835	5.74687
Osbpl3	0.00215949	0.0232169	5.12882	3.73541	0.525891	9.25042
P4htm	0.00942663	0.0495713	3.75746	-0.382608	-2.85314	5.5425
Padi2	0.00495072	0.0353887	-4.32591	1.78523	4.4107	-6.17083
Pafah2	0.00766027	0.0450021	3.93594	0.696202	-1.08198	3.42993
Paip2	0.00943425	0.0495713	-3.75677	5.60342	7.26307	-3.15941
Palm	0.000528989	0.0115158	-6.7177	-0.550936	5.15679	-52.2633
Pam16	0.00679576	0.0425449	-4.0409	0.346364	1.62425	-2.42483
Pbx1	0.00951288	0.0496716	-3.74972	0.0625415	1.97873	-3.77424
Pbx3	0.00682321	0.0426371	4.03735	2.67138	0.42571	4.74256
Pcyox1	0.00540927	0.0373524	-4.2451	3.30253	5.13852	-3.57018
Pdcd1	0.000596695	0.0122725	6.5687	2.0396	-3.01698	33.28
Pdcd1lg2	0.000594969	0.0122725	6.57225	1.62514	-3.38546	32.2361
Pde2a	0.0014194	0.0186518	-5.57015	1.66093	6.64459	-31.6395
Pde5a	0.00405642	0.0319604	-4.51094	0.394177	3.89393	-11.3118
Pdzd4	0.000528298	0.0115158	-6.71933	-0.858409	2.6808	-11.6254
Pex1	0.00554844	0.0377739	-4.22209	2.42185	3.57013	-2.21648
Phf11b	0.00366876	0.0305348	4.60602	4.11041	1.10184	8.04768
Phka2	0.00205595	0.022597	-5.17919	2.4831	4.33761	-3.61629
Phyhd1	0.00814084	0.0460239	3.88316	2.15825	-0.96607	8.71995
Pik3cb	0.0038722	0.0312432	4.55478	2.09522	-0.36804	5.5146
Pik3cg	0.0028499	0.0270277	-4.85061	5.57192	7.03328	-2.75369
Pla2g15	0.00176611	0.0210966	-5.33713	2.19876	4.07175	-3.66292
Pld2	0.000638877	0.0127871	6.48536	1.06581	-0.33549	2.6414
Plekhm1	0.00351893	0.0302179	-4.64585	3.54194	5.40102	-3.62776
Plin2	0.000562303	0.0118935	-6.64181	2.41501	4.43091	-4.04435
Plk3	0.00279675	0.0268657	4.86916	1.42174	-0.759143	4.5343
Pls3	0.000280451	0.00839475	-7.54851	-1.485	1.36277	-7.19884
Plxdc1	0.0046123	0.0342475	-4.39114	-1.531	2.95532	-22.414
Plxdc2	0.0094456	0.0495713	-3.75575	-1.36113	0.693646	-4.15478
Pmaip1	0.00453325	0.0340744	4.40716	2.62064	1.06704	2.93548
Poll	0.00238356	0.0243826	5.02863	2.16595	0.970057	2.29087
Polr3gl	0.00330479	0.0293491	-4.70622	1.89085	3.24552	-2.55737
Pomt1	0.0056966	0.0383876	-4.19829	1.87522	4.29473	-5.3499
Pou2af1	0.000660448	0.0129975	-6.44515	7.13066	8.99032	-3.62921
Ppfibp2	0.0019326	0.0220548	5.2431	2.87256	0.372698	5.65629
Ppp2r2d	0.00609266	0.0400222	-4.13794	3.38925	4.85283	-2.75791
Ppp2r3a	0.00402629	0.0318353	-4.51796	-0.678107	1.86731	-5.83778
Ppp2r5a	0.00102097	0.0159943	-5.93525	5.87632	7.61476	-3.33674
Pqlc3	0.00423539	0.0326117	-4.47045	3.72543	5.30971	-2.99859
Prkaa2	0.0059345	0.0395929	-4.16149	-2.61842	0.133683	-6.73697
Prkd3	0.00367511	0.0305348	-4.60437	4.02471	6.61712	-6.03104
Pten	0.0019374	0.0220548	-5.24053	6.46155	8.50586	-4.12475
Ptgr1	0.00243842	0.0245122	-5.00572	0.4378	5.54519	-34.4729
Ptprf	0.000406815	0.0101037	-7.05196	-0.728673	0.973801	-3.25459
Purg	0.000930825	0.0154388	-6.04078	-0.516644	1.42573	-3.84336
Rab11fip4	0.000131187	0.00582522	8.65459	3.47828	-1.46177	30.6974
Rab26os	0.00319085	0.0286601	4.74018	1.54819	-0.145998	3.23594
Rab30	7.13211e-05	0.0047041	9.64094	4.49092	-0.553388	32.9981
Rab33b	0.00290241	0.0272177	-4.83265	2.80474	4.88268	-4.22203
Rab43	0.00896428	0.0487078	-3.80034	3.97531	6.98563	-8.05746
Rag1	1.49238e-05	0.00244059	-12.6545	-2.61842	10.6559	-9907.57
Rassf8	0.00123641	0.0174528	-5.72102	-1.26333	0.562801	-3.54584
Rcor2	0.00859895	0.0474534	-3.83599	-0.329864	2.8163	-8.85301
Rgmb	0.00451295	0.0340375	4.41132	1.94004	-1.06002	8.00036
Rgs1	0.000167161	0.00640466	8.28766	3.54837	1.04446	5.67217
Rhof	0.000296434	0.00866834	7.47274	4.85165	1.28936	11.8129
Ric1	0.000867542	0.0150991	-6.12212	4.57221	5.98846	-2.66892
Rinl	0.00560492	0.0379606	4.21293	4.54411	2.86047	3.21239
Rmi2	0.00868027	0.047745	-3.82791	1.82963	3.31088	-2.79191
Rnf157	0.000886112	0.0151569	-6.09757	3.32691	5.72273	-5.26275
Rnf43	0.00190638	0.0218875	5.25728	2.41183	-1.64704	16.6664
Rpgr	0.00235779	0.0242469	-5.03959	0.996983	2.71052	-3.27965
Rpl13-ps6	0.00910804	0.0490124	3.78675	3.56799	2.40299	2.24234
Rpl36a-ps2	0.00648749	0.0415063	4.08199	6.70453	5.47337	2.34755
Rplp1	0.00675334	0.0424237	4.04643	7.94392	6.50933	2.70305
Rps2-ps10	0.00290948	0.0272459	4.83026	7.71513	6.01086	3.25866
Rps2-ps13	0.00223429	0.0234603	5.09411	4.41691	2.77116	3.12909
Rpsa	0.00119329	0.0170961	5.7603	8.03988	6.18804	3.60962
Rpsa-ps1	0.00219422	0.0232891	5.11254	0.418617	-1.50412	3.7914
Rsph9	5.37577e-06	0.00133366	-15.0726	-3.7165	3.1573	-117.279
Rtl6	0.00588668	0.0393129	-4.16876	3.12251	4.26643	-2.20981
Rwdd2a	0.00257157	0.0254232	-4.95247	-2.40724	-0.471509	-3.82571
Sap30	0.00672509	0.0423794	-4.05014	1.19303	3.04677	-3.61437
Sccpdh	0.00671409	0.0423782	-4.05158	0.136333	2.71718	-5.98289
Sdc4	0.00366688	0.0305348	-4.60651	4.1029	6.05116	-3.85907
Selenop	0.000583098	0.0122539	-6.59701	4.1135	7.38134	-9.63203
Sema4b	0.00520998	0.0365122	-4.27923	4.80478	7.27141	-5.52754
Serpina3g	0.00821846	0.0462389	3.87497	5.15365	2.20582	7.7159
Serpinb6b	0.00115238	0.0167006	5.79909	2.91206	1.22282	3.22486
Setbp1	6.90676e-05	0.0047041	9.69556	5.26678	0.891779	20.7494
Sft2d2	0.00915401	0.0491808	-3.78245	5.58121	6.70298	-2.17613
Sgcb	0.00341693	0.0299093	-4.67407	0.325	2.50023	-4.51656
Sh2b2	0.00150508	0.0193696	5.50696	3.22336	0.919625	4.93734
Sh2d5	0.000105002	0.00552653	-9.00409	-1.80051	2.4893	-19.5597
Sh3bgrl2	0.000853297	0.0150991	6.14137	3.14421	-0.475583	12.2932
Sh3bp5	0.0013841	0.0184763	5.59746	6.00826	2.99892	8.05195
Sik3	0.00169479	0.0205996	-5.38054	3.27192	4.80292	-2.88986
Sit1	0.00714704	0.0437634	-3.99655	1.22812	3.21202	-3.95561
Six5	0.000548616	0.0117269	6.67235	0.0760411	-3.59746	12.7595
Skap1	0.00670814	0.0423782	4.05237	2.52498	-0.142675	6.35395
Slamf6	0.00185411	0.0216498	-5.28623	5.36344	6.98504	-3.07716
Slamf8	0.00818312	0.0461462	3.87869	0.596695	-2.71268	9.91334
Slc12a2	6.51643e-05	0.00469814	9.79524	3.67695	2.07459	3.03641
Slc20a2	0.000322579	0.00904976	7.35841	4.09162	2.0879	4.01031
Slc25a19	0.0024323	0.0245122	5.00825	5.18152	3.28574	3.72124
Slc25a35	0.00354833	0.0302952	-4.63788	-1.07675	0.628502	-3.26087
Slc27a1	0.00235274	0.0242321	-5.04176	1.18019	4.19394	-8.07664
Slc2a6	0.00225215	0.0235948	5.08602	1.60123	-0.0667076	3.1776
Slc35g1	0.00239079	0.0243992	5.02557	2.06884	0.363533	3.26098
Slco4a1	0.000250207	0.00788747	-7.70653	-0.777273	4.62796	-42.3778
Slfn1	0.00128627	0.0177859	5.67751	3.11293	-1.02356	17.5877
Slfn4	0.00609759	0.0400222	4.13721	1.9983	-0.420428	5.34698
Smad7	0.0019198	0.0220038	-5.25	1.78604	4.2546	-5.53493
Smarcd2	0.00355474	0.0302952	-4.63615	5.24563	7.12986	-3.69154
Smim24	0.00189114	0.0218623	-5.26563	0.711273	2.15847	-2.72679
Smim3	0.00234049	0.0242176	-5.04703	0.470901	3.4896	-8.10437
Snhg3	0.000950675	0.0154715	6.01657	2.55873	0.675332	3.68944
Snora74a	0.0078807	0.0456638	3.91129	7.2716	4.0579	9.27728
Snord15a	0.00806401	0.0459149	3.89136	3.28176	1.06504	4.64835
Snord15b	0.00365197	0.0305348	4.61039	5.16158	1.98404	9.04763
Snx29	0.00901057	0.0487701	-3.79593	3.46223	5.20387	-3.34415
Socs1	0.000505772	0.0111187	-6.7739	1.25994	4.05989	-6.96418
Socs2	0.0031036	0.028351	-4.76712	0.0796612	2.64444	-5.91666
Sord	0.00782239	0.0454498	-3.91773	1.8524	3.94816	-4.2745
Sowahc	0.0021246	0.0230136	5.14549	2.87625	1.00434	3.66017
Sp140	0.00399769	0.0316464	4.52467	6.18677	3.81975	5.15874
Spef2	0.000233891	0.00757603	-7.80121	-2.18936	2.99291	-36.3093
Spns3	0.00042292	0.0102371	-7.00172	0.265783	6.40123	-70.2996
Srl	0.0068384	0.0426526	-4.03538	0.148947	1.85861	-3.27085
Stambpl1	0.00120757	0.0172444	-5.74711	3.12983	7.32046	-18.2601
Stk26	0.00388422	0.0313025	-4.55185	3.2975	6.29173	-7.96807
Stk39	0.000191408	0.00689993	8.08848	1.39463	-2.0955	11.2366
Strip2	0.00456358	0.0340744	4.40097	-0.297226	-2.59298	4.91012
Stxbp1	0.00550537	0.0377053	-4.22914	0.659258	2.22901	-2.96853
Syde1	0.000155946	0.0062821	-8.39141	-1.63964	1.57208	-9.26454
Tarbp1	0.000449952	0.0105587	-6.92213	2.85457	5.82402	-7.8324
Tbc1d19	0.000778268	0.0145356	-6.2492	0.147156	1.60018	-2.7378
Tcirg1	0.000596677	0.0122725	-6.56873	3.95192	6.14068	-4.55913
Tfg	0.00412176	0.0322729	-4.49593	3.50684	5.09357	-3.00367
Tgfbr1	0.00521306	0.0365122	-4.2787	4.21645	6.031	-3.51751
Tgfbr3l	0.0017842	0.0212487	-5.32643	-0.91037	1.06137	-3.92242
Thrb	0.00033776	0.00935819	-7.29681	-2.11542	1.68041	-13.8886
Thsd1	0.00710464	0.0435576	-4.00177	-2.71202	2.22631	-30.6609
Thy1	0.00258384	0.02544	4.94772	3.4964	0.183422	9.93812
Ticam2	0.00130055	0.0178756	5.66539	2.65278	1.45863	2.2881
Tle1	0.00724641	0.0442506	-3.98444	0.840401	2.25432	-2.6646
Tlr1	0.000814886	0.0148953	6.19515	4.88937	0.484608	21.1819
Tlr12	0.00261485	0.025595	-4.93583	0.498078	2.54432	-4.13029
Tmcc1	0.00746408	0.0445139	-3.95856	3.74424	5.32252	-2.98614
Tmem140	0.00389395	0.0313433	4.54949	2.78888	1.11009	3.2016
Tmem181b-ps	0.00618683	0.0403136	-4.12423	2.04898	4.18607	-4.39873
Tmem240	0.00822016	0.0462389	-3.87479	-1.88601	0.478043	-5.14815
Tmem41a	0.00357296	0.0303249	4.63127	0.420627	-1.52266	3.84582
Tmtc3	0.00366915	0.0305348	-4.60592	0.758408	2.44496	-3.21885
Tnfrsf18	0.000838848	0.0150991	6.16127	2.32464	-0.0754542	5.27839
Tnfrsf9	0.00161208	0.0201717	5.43357	0.760691	-2.17192	7.63492
Tor3a	0.00130101	0.0178756	5.66501	3.82521	2.6411	2.27223
Tox	0.00162103	0.020189	5.42768	2.47167	-1.32164	13.8644
Tpi-rs11	0.00588123	0.0393129	4.16959	1.14328	0.0443274	2.14199
Tra2a	0.00658525	0.0419317	-4.06873	5.34188	6.8353	-2.81556
Trac	0.00169136	0.0205996	5.38268	3.33405	-0.878909	18.545
Traf1	0.000358456	0.00957357	7.21779	4.72076	1.21538	11.356
Tram1	0.00367393	0.0305348	-4.60468	5.83953	7.8319	-3.97889
Trbc2	0.00171243	0.0207225	5.36961	4.04449	0.345093	12.9906
Treml2	0.00595851	0.0396823	-4.15787	3.08375	6.13236	-8.27413
Trerf1	0.00270844	0.0262809	4.9009	1.17686	-1.69865	7.33862
Trim3	0.0041897	0.0324762	-4.4806	0.808583	2.60342	-3.46976
Trim36	0.00691503	0.0429019	-4.02556	-1.31689	0.847872	-4.48392
Trip4	0.00774324	0.0451072	-3.92657	3.43274	4.64846	-2.32255
Tspan13	0.00192612	0.0220386	-5.24659	4.39778	6.83417	-5.41284
Tspan2	0.00324105	0.028898	-4.72505	0.273153	3.82895	-11.7599
Ttc7b	0.00744721	0.0445139	-3.96053	2.34518	3.79783	-2.7371
Txndc5	0.00208568	0.022776	5.16444	6.54986	5.31318	2.35656
Tyro3	0.00602594	0.039749	4.14779	-1.09606	-3.30498	4.6233
Uaca	7.62621e-05	0.00487148	-9.52786	-1.70745	1.94496	-12.5743
Ube2e2	0.00258955	0.0254589	4.94552	-1.10498	-2.91891	3.51597
Ube2j1	0.0035427	0.0302952	-4.6394	5.24164	6.31649	-2.1065
Ube2w	0.0092065	0.049326	-3.77758	3.29709	4.56493	-2.40801
Utp14b	0.00133139	0.0181813	-5.63975	2.77769	4.72625	-3.85989
Vangl2	0.00435022	0.0332515	-4.44547	-0.179678	3.94262	-17.4154
Vmn2r96	0.000546648	0.0117269	6.67681	4.16654	-0.765957	30.5373
Wsb1	0.00485077	0.035277	-4.34464	4.9744	6.26158	-2.44051
Wwc2	0.0011414	0.0167006	-5.80978	-0.319989	2.81098	-8.76021
Xrcc6	0.000585283	0.0122539	-6.59241	4.12026	7.92241	-13.9496
Yy2	0.00544062	0.0374531	-4.23986	1.11778	2.52096	-2.64483
Zap70	0.00351979	0.0302179	4.64561	2.43561	0.225964	4.62561
Zbed4	0.00303722	0.0280786	-4.7882	5.07058	7.02392	-3.87271
Zbp1	0.00874317	0.0479316	3.82172	3.59252	1.63719	3.87804
Zbtb20	0.00273555	0.0264296	4.89103	7.26739	4.73116	5.8007
Zbtb38	0.000461994	0.0107558	6.88843	6.47578	4.18003	4.9101
Zbtb7b	0.00509507	0.0361508	4.29959	4.42349	1.68634	6.6675
Zc3h12d	0.00641223	0.0412237	4.09236	5.2227	3.9175	2.47118
Zc4h2	0.00796927	0.0456822	-3.9016	0.205005	1.6396	-2.70306
Zdhhc2	0.00629215	0.0408152	4.10918	1.85977	-1.36377	9.34073
Zdhhc7	0.00858654	0.047424	-3.83723	3.06654	4.5953	-2.88539
Zfp229	0.0035837	0.0303393	-4.6284	1.17415	3.10485	-3.8124
Zfp248	0.00610033	0.0400222	4.13681	-0.0551132	-1.23649	2.26793
Zfp286	0.00347068	0.03008	-4.65908	-1.74813	2.28437	-16.3646
Zfp354c	0.00037751	0.00988751	-7.14955	1.19699	3.1369	-3.83681
Zfp382	0.00554723	0.0377739	-4.22228	1.48085	2.93984	-2.74916
Zfp41	0.00794582	0.0456822	-3.90415	2.81595	4.1669	-2.5508
Zfp433	0.00946132	0.0495713	-3.75434	2.21843	3.60399	-2.61274
Zfp54	0.00466694	0.0345685	-4.38025	1.42688	2.97149	-2.91726
Zfp61	8.95055e-05	0.00500112	-9.26233	1.29646	3.54217	-4.74272
Zfp687	0.00771495	0.0450568	-3.92975	3.93477	5.27889	-2.53877
Zfp810	0.00253082	0.0251023	-4.96843	2.49842	4.81766	-4.99069
Zfp820	0.000489225	0.0109708	-6.8158	-2.27722	1.06922	-10.1713
Zfp976	0.00511252	0.0361598	-4.29647	-0.289643	1.96296	-4.76542
Zik1	0.00365746	0.0305348	-4.60896	0.500457	2.82796	-5.01934
Zkscan17	0.000105503	0.00552653	-8.9965	2.60723	5.59794	-7.94864
Zmat3	8.89202e-05	0.00500112	9.27308	3.25551	0.806819	5.4592
Znrf1	0.00958641	0.0497114	-3.74319	2.75684	5.17487	-5.3444
1110008P14Rik							0.000833161	0.00824132	-4.91251	0.809053	2.37838	-2.96766
1500009L16Rik							0.00414053	0.0216337	3.81198	-0.312632	-3.58636	9.67146
1700025G04Rik							6.94855e-06	0.000458736	9.22899	3.73777	0.70302	8.19503
2210016F16Rik							0.0160083	0.0484114	-2.95812	2.50501	3.72116	-2.32326
2310043P16Rik							0.0151954	0.0468039	-2.99022	1.07619	2.22698	-2.22034
2510009E07Rik							0.000438344	0.00567008	5.39064	2.83649	-0.180281	8.09354
2510016D11Rik							0.00201986	0.0138784	4.29007	0.355116	-1.41126	3.40198
2700081O15Rik							0.00385972	0.020644	-3.85785	2.45063	4.98321	-5.78604
2810013P06Rik							0.00326198	0.0185776	-3.96851	2.44068	4.55043	-4.31616
2900093K20Rik							0.00114218	0.00991645	-4.6862	-0.834119	1.20533	-4.1109
4632415L05Rik							0.0143928	0.0452917	-3.0237	2.27832	3.7656	-2.80361
4632427E13Rik							0.016423	0.0489833	-2.94238	4.4783	5.8758	-2.63445
4833421G17Rik							0.00425247	0.0219671	-3.7946	-0.584946	1.40332	-3.9676
4833439L19Rik							0.00286865	0.0173258	-4.05377	4.04152	5.46403	-2.68052
4930412F12Rik							0.00870329	0.0340981	-3.33688	-0.247102	1.1383	-2.61244
4930522L14Rik							0.00834973	0.0333467	-3.36297	2.44699	4.17313	-3.30843
4931406C07Rik							0.00567919	0.0263736	3.60775	2.50065	0.625715	3.66784
5031425E22Rik							0.0152002	0.0468039	-2.99003	3.30676	4.76761	-2.7527
5830428M24Rik							0.00141511	0.0113025	-4.53545	0.842692	2.929	-4.24661
6330537M06Rik							0.000683316	0.00745342	-5.05754	-1.01568	2.33229	-10.1822
6720475M21Rik							0.00700714	0.0299903	3.47376	0.277044	-1.4013	3.20061
9130019O22Rik							0.014084	0.0447746	-3.03709	1.71724	2.97976	-2.39916
9130401M01Rik							0.000607655	0.00687242	5.14444	2.88865	1.20536	3.2116
9330159M07Rik							0.00212454	0.0142453	4.25571	1.99586	-0.608282	6.0803
9430034N14Rik							0.0171678	0.0498419	-2.91511	2.1791	3.52194	-2.53651
A330023F24Rik							0.00565999	0.0263418	3.60992	1.41906	-0.0778733	2.82241
A430078G23Rik							0.0123442	0.0416633	-3.11871	3.29826	5.10023	-3.48695
A630001G21Rik							0.0100118	0.0368467	-3.2491	3.29055	5.18651	-3.7217
A930024E05Rik							0.00409556	0.0214513	-3.8191	-1.53332	0.448435	-3.94975
AC126457.1							0.0014221	0.0113025	-4.53201	-1.37389	1.93937	-9.9401
AI467606							0.0118048	0.0405589	-3.14645	4.15261	5.46279	-2.47973
AI837181							0.00356072	0.0195572	-3.91074	2.65136	4.03437	-2.60813
AL732309.1							0.0152229	0.0468039	-2.98911	0.326409	1.5156	-2.28025
Abca1							0.0164115	0.0489833	-2.94281	5.20255	6.87614	-3.19008
Abca2							0.00897183	0.0346405	3.31779	4.46633	2.79626	3.18232
Abca9							0.0125385	0.0420202	3.10903	1.5416	-2.13609	12.7967
Abcb1b							0.000641433	0.00712827	5.10428	3.52982	-0.0261706	11.7615
Abcc4							0.0152351	0.0468039	2.98862	3.66307	2.50863	2.22598
Abcd1							0.00159801	0.0122026	-4.45095	4.45142	5.89456	-2.71912
Abhd1							0.00877356	0.0341848	-3.33183	0.24502	1.97181	-3.3099
Abhd15							0.000403217	0.00535667	5.45466	3.28184	1.00905	4.83257
Abhd17a							0.00615317	0.0276381	-3.55647	3.43113	4.70305	-2.41483
Abi1							0.00328315	0.0186649	-3.96424	5.40594	6.81086	-2.64803
Abt1							0.0173156	0.0499985	-2.90985	2.31633	3.7247	-2.65438
Abtb1							0.00422545	0.0219165	-3.79875	3.25363	5.08398	-3.55626
Abtb2							0.0143584	0.0452801	-3.02517	1.3078	2.93107	-3.08073
Acacb							8.17019e-06	0.000505628	9.04856	0.415346	-2.41685	7.12157
Acbd4							0.0162197	0.0487506	-2.95005	1.6438	3.27998	-3.10843
Acd							0.0165904	0.0491255	-2.93614	2.48523	3.67932	-2.28801
Acot2							0.0018721	0.0133067	-4.34196	1.36766	3.16145	-3.46725
Acp2							0.011854	0.0406587	3.14387	3.33444	2.00216	2.51801
Acrbp							0.00116522	0.0100482	-4.67205	0.358134	2.75618	-5.27088
Acsl4							0.00582986	0.0266663	-3.59098	4.68011	5.96451	-2.43581
Acss1							2.52495e-05	0.000971952	-7.86901	3.73314	6.66452	-7.62842
Acss2							0.0164382	0.0489833	-2.94181	-0.691546	1.30717	-3.99645
Actn4							0.0108701	0.0386317	3.19777	5.43676	4.27574	2.23615
Actr5							0.0164784	0.0489833	-2.94031	2.71207	3.89822	-2.27544
Adap1							0.000700407	0.00754739	5.03935	3.6191	1.09258	5.76181
Adcy6							0.00669247	0.0291106	3.50294	3.7402	0.137428	12.1491
Adcy9							0.0115569	0.0402259	3.15964	2.14321	1.0306	2.16236
Adgra2							0.000147231	0.00291272	6.26357	1.67094	-3.98922	50.5683
Adgre5							0.00328316	0.0186649	-3.96423	4.96758	6.97163	-4.01126
Adgrg3							0.0100277	0.0368472	3.2481	5.14395	1.01857	17.4526
Adgrl1							0.00317506	0.0183189	3.98638	3.764	1.5551	4.62322
Adm							0.00110725	0.00977231	-4.70824	-2.82586	-0.605891	-4.65883
Ado							0.0116515	0.0403175	-3.15457	3.57024	4.61257	-2.05954
Aff1							0.00231905	0.0150903	-4.19639	5.93689	8.11568	-4.52772
Aff3							0.00888175	0.0344645	-3.32413	5.15059	7.09796	-3.85671
Aftph							0.00797293	0.0324952	-3.39207	5.79985	7.22408	-2.68372
Agap1							2.08644e-05	0.000849193	8.05936	2.82071	-1.29535	17.3403
Agpat1							0.0102031	0.0372139	-3.23727	3.4028	4.51923	-2.1681
Agpat2							0.00352482	0.0194336	3.91741	2.52025	0.131225	5.23803
Ak3							0.00689626	0.0296349	-3.48388	4.51878	6.05976	-2.90992
Akap17b							0.00365888	0.0199661	-3.89288	2.62844	4.69292	-4.18282
Akap8l							0.00126104	0.0105471	-4.61626	2.82976	4.7712	-3.84089
Akna							0.00294985	0.0174925	-4.03519	5.91577	7.63187	-3.28548
Akr1b10							0.00377247	0.0203255	-3.87283	2.35009	3.91591	-2.96046
Akt2							0.0101749	0.0371955	-3.239	4.20504	5.35538	-2.21966
Akt2-ps							0.00472028	0.0235094	-3.72686	2.51511	3.74222	-2.34098
Alas2							0.0040319	0.0212867	-3.82932	1.28887	4.57572	-9.75982
Aldh7a1							0.010861	0.0386317	3.1983	1.70375	-0.214369	3.77929
Alg8							0.00809311	0.0328767	3.38263	2.65365	1.02541	3.09136
Alox5ap							0.000125619	0.00263182	6.39765	4.85782	1.48709	10.344
Alyref2							0.00845624	0.033493	-3.35499	1.49957	2.98382	-2.79771
Amotl1							0.000763513	0.00785643	4.97609	4.39949	0.447589	15.4753
Amz1							3.86789e-07	0.000154474	13.0059	2.98119	-2.07826	33.3463
Angptl4							0.000574948	0.00664362	5.1857	2.62269	0.452884	4.49962
Ank3							2.20954e-05	0.000887985	8.00178	1.37812	-5.0317	85.0255
Ankrd13b							0.00423786	0.0219626	3.79684	0.807389	-2.37074	9.05132
Ankrd33b							0.00129707	0.0107256	-4.59645	0.834736	4.74693	-15.0553
Ankrd55							2.07349e-05	0.000849193	-8.06563	-3.50741	3.19607	-104.219
Ankrd9							7.00035e-05	0.00182981	-6.90849	0.0961443	3.12846	-8.1812
Anks3							0.0120017	0.0410902	-3.13618	3.2849	4.60278	-2.49299
Ankzf1							0.0136899	0.044178	-3.05464	2.97324	4.4034	-2.69475
Ano8							0.0105597	0.0380364	-3.21583	1.54008	2.94776	-2.65309
Anp32b							0.0162923	0.048854	2.9473	4.76717	3.39892	2.58157
Anp32b-ps1							0.00530745	0.0255617	3.65122	1.86471	0.122947	3.34444
Antxr1							5.40724e-05	0.00156248	7.14302	1.44011	-2.42803	14.6025
Anxa1							0.000690235	0.00750102	5.05012	5.50361	2.61125	7.4248
Anxa5							0.0012219	0.010349	4.63847	3.73082	2.34995	2.60425
Ap2a2							0.00136981	0.0110855	4.55819	5.58395	4.07387	2.84825
Ap3d1							0.0115636	0.0402259	-3.15928	5.13776	6.28873	-2.22063
Apba3							0.0126426	0.0422302	-3.1039	1.78573	3.29376	-2.84422
Apobr							0.00819409	0.0331184	3.37482	3.17246	-0.196749	10.3332
Apold1							0.0140955	0.0447889	3.03659	1.16298	-0.95292	4.33461
Appl2							0.0167153	0.0493579	-2.93153	2.83645	4.06752	-2.34741
Aqp1							5.12919e-05	0.0014987	7.19167	2.58601	-0.0827582	6.35887
Ar							0.000674955	0.00742334	5.06662	0.3093	-2.51698	7.09243
Arap3							0.00235301	0.0152183	4.18658	1.99199	-0.265479	4.78152
Arel1							0.000551578	0.00655127	-5.21676	4.77447	7.19287	-5.3458
Arf6							0.0154616	0.0473065	-2.97952	5.48611	6.64259	-2.22913
Arhgap17							0.00347586	0.0193149	-3.92662	4.46019	6.66665	-4.61541
Arhgap23							0.00341804	0.019159	3.93767	2.29659	0.721871	2.97878
Arhgap24							0.00321626	0.0184549	-3.97785	0.956473	4.55441	-12.1084
Arhgap25							0.00150797	0.0117799	-4.49117	4.70144	6.42782	-3.30897
Arhgap27							0.0157639	0.0480254	-2.96759	4.21984	5.55638	-2.52544
Arhgap29							0.00410214	0.0214682	3.81805	2.22554	-0.128321	5.1119
Arhgap30							0.0140814	0.0447746	-3.03721	6.85136	7.92973	-2.11164
Arhgap45							0.00258555	0.0161187	-4.12321	6.3609	7.92266	-2.95212
Arhgap6							0.00756406	0.0313046	3.42532	2.1589	0.82246	2.52527
Arhgef10							0.00600887	0.0272161	3.57163	1.85605	0.362752	2.81531
Arhgef17							0.000291547	0.00445691	5.70745	2.3268	-2.16176	22.4487
Arhgef18							0.00655415	0.0287169	-3.51623	4.65716	6.82965	-4.508
Arhgef39							0.0120443	0.0412009	3.13397	2.84819	1.5911	2.39012
Arhgef4							0.0102825	0.0373628	3.23244	0.578979	-1.0464	3.08523
Arl5a							0.000419146	0.00550396	-5.42491	4.98684	7.73182	-6.70382
Armc5							0.00197423	0.0137572	-4.30565	2.41727	3.93373	-2.86089
Armcx2							0.00679815	0.0293515	-3.49298	0.167274	3.62877	-11.0158
Arntl							0.000780613	0.00791666	-4.95992	0.973664	5.311	-20.2147
Arrb1							0.00576549	0.0265047	3.59809	5.31449	3.66665	3.13364
Arrb2							0.000101656	0.00231167	6.57943	4.99056	3.06332	3.80327
Arrdc1							0.0172747	0.0499255	-2.9113	3.70308	4.71373	-2.01482
Arrdc2							0.00781642	0.0320497	-3.40458	1.80393	2.97892	-2.25791
Arrdc3							0.0128845	0.042681	-3.09216	4.14661	5.81443	-3.17733
Arrdc4							0.0116212	0.040271	3.15619	1.68595	-0.396352	4.23483
Arsb							1.58955e-05	0.000782971	8.33698	4.16367	1.25178	7.526
Arsg							0.00174917	0.0127886	4.38857	0.41552	-2.92724	10.1455
Asap1							0.00873606	0.0341219	3.33452	4.93511	3.55497	2.60295
Asb13							0.00197964	0.0137643	-4.30378	1.69009	3.82429	-4.38993
Ass1							0.000759452	0.0078391	4.97999	2.08112	-1.08926	9.00283
Atat1							0.0127679	0.0424939	-3.09779	0.561708	1.77749	-2.32267
Atf4							0.00911167	0.0348227	-3.30809	5.86365	7.02556	-2.23753
Atg12							0.00991533	0.0366411	-3.25515	3.83822	5.26413	-2.68684
Atg2a							0.0138423	0.0443816	-3.04779	3.51161	4.86174	-2.54936
Atg4d							0.0024059	0.0153737	-4.1716	2.78359	4.47111	-3.22101
Atg9a							0.0152019	0.0468039	-2.98996	2.71025	4.01697	-2.47379
Atp1a1							0.000617975	0.00692782	5.13192	6.79295	5.14717	3.12917
Atp2b4							0.000805256	0.00802744	4.93727	5.38549	2.39057	7.97186
Atp8b4							7.76441e-05	0.00199255	6.81598	5.18573	1.1763	16.1049
Atxn7							0.00459925	0.0230684	-3.74369	3.84722	5.41	-2.95422
Avl9							0.0102087	0.0372139	-3.23693	4.58989	6.06164	-2.77359
B3galt4							0.00191208	0.0135307	-4.3275	0.529516	2.00595	-2.78261
B3gat3							0.000514658	0.00627608	-5.26884	2.67343	4.07442	-2.64083
B3gnt2							0.00169915	0.0126273	-4.40855	2.27584	5.86547	-12.0389
B3gnt5							0.0121038	0.0413158	-3.13092	4.66307	6.72325	-4.17038
B4galt4							9.07547e-06	0.000547096	8.93305	1.88689	-1.25141	8.80486
B630019A10Rik							0.000741427	0.00772076	4.99757	-1.19908	-3.70122	5.66527
B930095G15Rik							1.91262e-05	0.00084406	8.14734	1.78531	-3.55499	40.5126
BC028528							0.00935538	0.035269	3.29154	3.05591	1.19788	3.62512
BC048403							0.00104606	0.00940132	4.74872	1.03962	-1.74938	6.9115
Bahd1							0.01591	0.0482968	-2.96191	2.83807	4.18827	-2.54948
Banp							0.00287566	0.0173517	-4.05214	2.99135	4.85101	-3.62921
Baz2b							0.00485505	0.0240494	-3.70866	5.88973	7.38297	-2.81521
Bbs10							0.00580586	0.0265755	-3.59362	0.674417	2.68486	-4.02907
Bcap29							0.000518546	0.00629844	5.26317	4.38679	1.43465	7.73893
Bcat2							0.0134759	0.0438242	3.06438	3.22604	2.02901	2.29268
Bckdha							0.00825286	0.0331638	-3.37032	3.45097	5.13054	-3.20332
Bcl10							0.00325716	0.0185667	-3.96949	3.82569	5.15614	-2.5148
Bcl2l1							0.000147835	0.00291326	-6.26013	3.02068	6.49525	-11.116
Bcl2l2							0.011808	0.0405589	3.14628	2.88961	1.55063	2.52972
Bcor							0.00929699	0.0351942	-3.29546	4.6076	6.56505	-3.88377
Bin2							0.0163109	0.0488638	2.9466	4.56732	2.83602	3.32028
Birc3							0.00194362	0.0136873	-4.31632	4.72583	6.88869	-4.47803
Bivm							0.00709714	0.0301133	3.46566	2.93534	0.803666	4.38224
Blvra							0.0025996	0.0161905	4.11957	2.73809	1.28552	2.73696
Blvrb							2.846e-05	0.00104718	-7.75136	1.98516	5.14103	-8.91272
Blzf1							0.0163537	0.0489004	-2.94498	2.56438	3.64643	-2.11704
Bnip3							0.000185489	0.00335749	-6.07182	1.4922	3.09071	-3.02831
Borcs6							0.00722198	0.0304504	-3.45461	1.59105	2.824	-2.35046
Borcs8							0.00231737	0.0150903	-4.19688	1.80711	3.19314	-2.61358
Bpgm							0.00201712	0.0138784	-4.291	2.26398	4.43332	-4.49819
Brd2							0.0117107	0.0403903	-3.15142	6.27007	7.57017	-2.46246
Bri3bp							1.17566e-05	0.000642089	8.65364	5.43799	2.3909	8.26543
Brox							0.00245761	0.015626	-4.15729	4.3934	5.96897	-2.98053
Brwd1							0.0100644	0.0369183	-3.24582	4.90897	6.78574	-3.67253
Bsdc1							0.000785739	0.00792351	-4.95514	3.48572	5.45629	-3.91924
Bsn							0.00225302	0.0148268	4.21591	2.00653	-0.975706	7.90209
Btg1							4.66669e-05	0.00143366	-7.27937	5.90095	9.36265	-11.0173
Btg3							0.000733923	0.00769039	-5.00502	-0.230972	2.40491	-6.21554
C030034L19Rik							0.000896894	0.00863126	4.85915	0.727883	-3.92794	25.2083
C1qbp							0.00680402	0.029357	3.49243	4.61147	2.18607	5.37175
C430019N01Rik							0.0153138	0.0469103	2.98544	0.366987	-1.78801	4.45369
C730034F03Rik							0.00865698	0.0340419	-3.34023	-1.25597	0.494665	-3.36507
C87436							0.0143288	0.0452767	-3.02645	2.48753	3.87691	-2.61966
Cables1							0.00810431	0.0329012	3.38176	-1.05586	-2.82826	3.41622
Cables2							0.00276328	0.0168808	-4.07873	3.28637	4.99581	-3.27034
Cacna1e							0.000462164	0.00584798	-5.35031	3.24891	8.04807	-27.8415
Cacnb1							0.0101473	0.0371159	-3.2407	0.507686	3.59289	-8.48669
Cage1							0.00723928	0.0304504	-3.45309	-0.542708	1.17707	-3.29385
Calcoco1							0.0017295	0.0127204	-4.39636	2.36198	5.35186	-7.94407
Calm1							0.00655679	0.0287169	-3.51597	7.52687	8.5765	-2.07
Camk2d							0.00709201	0.0301133	-3.46612	5.80045	8.36909	-5.93247
Capn3							0.0168016	0.0494756	2.92837	0.00175329	-2.26163	4.80114
Carhsp1							0.000712074	0.00759757	-5.0272	3.31052	5.68952	-5.20176
Carmil1							0.00506766	0.0247951	-3.68099	2.03136	4.88748	-7.24064
Casp4							0.00292608	0.0174284	-4.04057	1.43632	3.33956	-3.74052
Cass4							0.00370906	0.0201196	3.88394	3.67022	1.63138	4.10914
Cbx7							0.0126236	0.0421901	-3.10483	1.93291	4.74547	-7.02528
Cc2d1a							0.00759414	0.0313884	-3.42281	2.46796	3.80526	-2.52678
Ccdc102a							0.00478394	0.0237894	3.7182	1.47106	-1.26552	6.66487
Ccdc116							0.00909963	0.0348184	3.30892	1.10646	-1.39943	5.68001
Ccdc122							0.00171341	0.0126939	4.40279	1.51504	-2.90476	21.4038
Ccdc130							0.0145781	0.0456095	-3.0158	1.2257	2.52363	-2.45876
Ccdc142							0.00313278	0.0181656	-3.99525	-0.0752226	1.21544	-2.4464
Ccdc17							0.000823184	0.00815527	-4.92125	-0.468257	2.0895	-5.88793
Ccdc186							0.00157597	0.0121477	-4.46057	3.14828	5.08466	-3.82743
Ccdc69							0.0108667	0.0386317	-3.19797	2.44762	3.66475	-2.32484
Ccdc71l							0.00122196	0.010349	-4.63844	3.14354	5.14394	-4.00111
Ccdc91							0.0085515	0.0336974	-3.34794	0.0697036	2.40125	-5.03346
Ccm2							0.00175991	0.0128231	-4.38437	4.30866	6.83958	-5.7794
Ccndbp1							0.0048695	0.0240685	-3.70674	3.2647	4.79064	-2.87974
Ccnl1							0.0155277	0.0474496	-2.97689	5.82996	7.16222	-2.51797
Ccpg1							0.0104475	0.0377825	-3.2225	3.88262	5.59501	-3.27701
Ccr7							0.0018379	0.0132281	-4.35459	1.68258	5.18031	-11.2959
Ccrl2							0.000255365	0.00411028	-5.81275	0.0239428	2.48977	-5.52443
Cd1d1							0.000193358	0.00345455	-6.03774	2.84935	5.77794	-7.61368
Cd2							2.72026e-06	0.000316597	-10.334	0.59263	5.99224	-42.2129
Cd27							0.00250099	0.0158463	-4.14552	-3.12906	0.365259	-11.2692
Cd300a							0.0100743	0.0369333	3.24521	2.97892	0.302682	6.39188
Cd33							0.000165825	0.0031074	6.16435	3.43421	-1.55668	31.7984
Cd34							8.60134e-05	0.00209781	6.72543	1.71218	-3.23922	30.94
Cd36							0.000790505	0.00794233	4.95073	4.93446	1.21241	13.1962
Cd38							0.000772821	0.00790132	-4.96724	3.86326	7.51879	-12.6016
Cd3eap							0.000296523	0.00446506	5.69408	2.88465	0.708088	4.52075
Cd4							0.00702396	0.0300021	3.47224	3.92144	1.24958	6.37249
Cd55							0.001244	0.0104457	-4.62584	2.4079	5.70791	-9.84925
Cd79b							0.0137374	0.044178	-3.05249	5.57598	9.24041	-12.6796
Cd9							0.00706987	0.0300628	3.4681	3.45966	0.631763	7.10039
Cdc25b							0.00329532	0.0187174	-3.96179	3.67287	6.53373	-7.26449
Cdc42bpg							0.00317079	0.0183189	-3.98727	1.1006	3.09164	-3.97523
Cdc42ep4							0.00262158	0.0162956	4.11393	1.5057	-0.253457	3.38501
Cdc42se1							0.0115851	0.0402259	-3.15813	5.54338	6.71283	-2.24925
Cdk6							0.00614077	0.0276335	3.55776	7.48435	4.94325	5.82034
Cdkn1b							4.35129e-05	0.00137647	-7.34481	4.66437	7.45261	-6.90783
Cdkn2aip							0.0033117	0.0187771	-3.95852	3.36524	5.22011	-3.61717
Cdkn2d							0.00355825	0.0195572	-3.9112	3.21189	4.65025	-2.71013
Cdyl2							0.000136658	0.00278103	-6.32628	-0.00392414	3.39134	-10.5215
Celsr2							0.00484365	0.0240116	-3.71018	-0.431861	2.4098	-7.16842
Cep120							0.00542272	0.0258398	-3.63741	3.96212	5.40785	-2.724
Cep89							0.00550144	0.0260016	-3.62815	2.28218	4.13746	-3.61822
Cercam							0.000946747	0.00889327	4.82018	1.48771	-0.85692	5.0793
Chchd6							0.00707111	0.0300628	3.46799	1.16807	-1.64916	7.04808
Chd2							0.0105021	0.037893	-3.21924	5.75862	7.0893	-2.51521
Chfr							0.0152005	0.0468039	-2.99002	4.5072	5.852	-2.53994
Chkb							0.000923605	0.00875644	-4.83798	3.2242	5.29613	-4.20451
Chmp1b							0.000641085	0.00712827	-5.10468	4.08384	6.06834	-3.95727
Chn2							0.000170246	0.00317165	6.14254	3.00381	-1.33739	20.269
Chpf							0.00838194	0.0333905	-3.36054	-0.211617	1.61338	-3.54306
Chrnb1							0.00661036	0.0288526	-3.51079	-0.035133	1.99248	-4.07729
Chtop							0.0157328	0.0479868	-2.96881	5.58944	7.02959	-2.71349
Ciao1							0.00801584	0.0326042	-3.38868	3.16176	4.65386	-2.81298
Cic							0.0122201	0.0414868	-3.12498	4.83941	6.35677	-2.86266
Cish							0.00827654	0.0331661	3.36851	3.9747	-0.0199755	15.9411
Cklf							0.0169276	0.0495044	-2.92377	3.32011	4.36179	-2.05862
Clasrp							0.0139609	0.0445829	-3.04252	3.29989	4.55075	-2.37984
Clcn2							0.00562779	0.0262302	-3.61358	-0.627063	1.02897	-3.1515
Clcn4							0.00186198	0.0132706	-4.34567	4.31065	6.00939	-3.24619
Clip1							0.00332341	0.0188101	3.95619	4.9422	3.48239	2.75072
Clk1							0.00298331	0.0175958	-4.02769	6.55378	8.37512	-3.53409
Clk2							0.013667	0.0441345	-3.05567	3.96932	5.25863	-2.44411
Clk3							0.00525247	0.0254846	-3.65792	4.88671	6.42401	-2.9025
Clk4							0.0107916	0.0385458	-3.20229	5.05143	6.53232	-2.79123
Cln6							0.000186527	0.00335749	6.06723	2.90627	-0.04517	7.73518
Cln8							0.000594269	0.00681846	5.16103	1.86708	-0.103307	3.91872
Cltb							0.000180951	0.00332264	6.09219	2.34621	0.41186	3.82207
Cmas							0.00276687	0.0168866	-4.07786	3.77193	5.18878	-2.67001
Cmklr1							0.00836597	0.0333799	3.36174	0.637971	-0.981787	3.07323
Cmpk2							0.0145947	0.0456218	-3.0151	1.32055	3.97211	-6.28347
Cmtm3							0.00036409	0.00509457	5.53349	2.70317	0.711729	3.97635
Cnr2							0.0125403	0.0420202	-3.10894	2.89095	5.02937	-4.40279
Cog3							0.0166163	0.0491674	-2.93519	4.20688	5.39403	-2.27704
Cog6							0.0059852	0.0271436	-3.57416	3.10992	4.46713	-2.56191
Col12a1							6.65923e-06	0.000447921	9.27686	3.25276	-3.13547	83.7622
Col18a1							0.00113188	0.00989431	4.69262	1.0488	-2.46501	11.4225
Col1a1							0.000212703	0.00364389	5.96	4.06116	-3.12074	145.201
Col7a1							0.0108937	0.0386727	-3.19642	-2.41715	-0.002586	-5.3316
Comtd1							0.0100397	0.0368663	3.24736	0.86965	-1.00507	3.66729
Coq10b							0.0115808	0.0402259	-3.15836	2.111	3.30269	-2.2842
Coro2a							0.000611015	0.00687392	5.14034	4.90692	3.51713	2.6204
Cpne2							0.00245701	0.015626	4.15745	2.49143	0.2706	4.6616
Cpt1b							0.0039672	0.0210302	-3.83989	0.312823	1.61913	-2.47308
Crebrf							0.0068617	0.0295659	-3.48707	5.01147	6.84426	-3.56226
Crim1							0.00143359	0.0113797	4.52639	3.01146	1.16602	3.59363
Crtap							0.00180982	0.0130675	4.36515	2.25212	0.0873535	4.48395
Cryl1							0.00374599	0.0202511	3.87744	2.4818	0.662077	3.53014
Cryz							0.00824053	0.0331638	3.37126	1.10527	-0.570449	3.19478
Csgalnact2							0.0130018	0.0429584	-3.08654	2.88785	4.50516	-3.06803
Csk							0.00569071	0.0263878	-3.60645	5.79537	7.53076	-3.32968
Csnk1e							0.00778955	0.0319892	-3.40675	2.91031	5.03856	-4.37187
Csrnp2							0.000708998	0.00758877	-5.03038	0.746045	3.46076	-6.56464
Ctbp2							9.67054e-06	0.00056177	8.86382	2.45477	-2.04754	22.6638
Ctdspl							0.00602203	0.0272527	3.57024	2.25747	0.103702	4.44988
Ctif							0.003194	0.0183871	3.98244	0.643852	-1.27438	3.77961
Ctla2a							0.000636066	0.0070933	5.11051	3.22394	0.0141802	9.25194
Ctla2b							0.0147812	0.0458506	3.00726	0.675444	-2.12134	6.94889
Ctnnd1							4.7923e-06	0.0003926	9.6542	3.8534	0.909791	7.69332
Ctps2							0.00981674	0.0364014	-3.2614	3.49729	5.39886	-3.73619
Ctsd							0.00615478	0.0276381	3.55631	6.76321	5.17918	2.99805
Ctsk							2.47857e-05	0.000959882	7.88736	3.67431	-2.26868	61.5202
Cxcl12							0.000352576	0.00499706	5.55845	4.31816	-1.06002	41.5905
Cxxc1							0.0137729	0.0442254	-3.0509	3.55622	4.91316	-2.56142
Cyb561d1							0.000456037	0.00579339	-5.36046	2.8752	5.15227	-4.84692
Cyb5r3							0.00138411	0.0111672	4.55093	3.5987	2.57308	2.03584
Cyfip1							0.000149369	0.00291886	6.25149	5.26438	3.23582	4.07997
Cyhr1							0.0124705	0.041874	-3.1124	4.41749	5.60218	-2.27314
Cyp39a1							0.00154116	0.0119805	-4.47605	-1.15466	2.16453	-9.98101
Cyp4f16							0.0048655	0.0240685	3.70727	3.18203	0.817209	5.1509
Cyth2							0.00277796	0.016922	-4.07519	2.93119	4.67254	-3.34348
Cyth4							0.00840109	0.0334265	3.35911	6.24531	4.37401	3.65861
Cytip							0.00105267	0.00943415	-4.74423	6.02067	8.27199	-4.76117
Cyyr1							4.16154e-05	0.00133167	7.38674	2.57303	-2.89588	44.2903
D030028A08Rik							0.000586506	0.00675274	5.17084	1.66803	-2.05274	13.1844
D5Ertd605e							0.00206188	0.0140595	4.27605	0.217984	-3.63546	14.4545
Dapk1							0.000148171	0.00291326	6.25824	2.30547	-2.93363	37.7681
Dapk2							0.00949393	0.0355605	3.28233	0.309794	-1.74064	4.1423
Dbn1							0.0161733	0.048657	2.95181	0.3207	-3.0125	10.0784
Dbnl							0.00250968	0.0158624	-4.14319	5.03636	6.47778	-2.71588
Dcaf12							0.0113855	0.0398868	-3.16893	5.22008	6.36163	-2.20617
Dcaf5							0.00561415	0.0262048	-3.61514	3.83164	5.36925	-2.90312
Dcaf6							0.00106942	0.00954035	-4.73298	2.7926	5.12465	-5.03523
Dclre1c							0.0165117	0.0489833	-2.93907	3.3847	5.01465	-3.09503
Dctpp1							0.00283188	0.0171686	4.06237	3.91793	1.93194	3.96135
Ddit3							5.08371e-05	0.0014987	-7.19991	0.873687	2.7803	-3.74928
Ddx54							0.00531197	0.0255617	-3.65067	4.87393	6.61012	-3.33156
Ddx58							0.0021144	0.0142071	-4.25896	3.82118	5.99867	-4.52364
Dedd2							0.000758497	0.0078391	-4.98091	3.07974	5.40425	-5.00895
Def8							0.0107086	0.0383779	3.2071	2.31277	0.937879	2.59349
Dennd2c							4.05988e-05	0.00131023	7.41007	1.81324	-1.55577	10.3317
Dennd4b							0.0126831	0.0423379	-3.10192	4.15467	5.59872	-2.72083
Dennd5b							0.000603189	0.00685126	-5.14993	2.79024	6.11285	-10.0047
Dennd6a							0.0171869	0.0498437	-2.91443	4.50035	6.05514	-2.9379
Deptor							0.000101413	0.00231167	6.58151	4.22679	0.403554	14.155
Dgka							0.00573997	0.0265017	-3.60093	3.78058	5.90092	-4.34795
Dgkd							0.00162974	0.0122994	-4.43735	6.35935	9.05898	-6.49632
Dgkh							0.00832899	0.0332862	3.36453	2.94521	1.4824	2.75645
Dgkq							0.0140526	0.0447427	-3.03847	3.01766	4.20958	-2.28455
Dglucy							0.000881158	0.00854416	4.87193	3.0055	-0.459417	11.0419
Dhrs13							0.000573585	0.00663987	5.18747	0.738061	-1.44315	4.53533
Dhx16							0.00636267	0.0281841	-3.53512	4.26238	5.84375	-2.99253
Dhx34							0.00415923	0.0216959	-3.80904	2.43571	4.15793	-3.29945
Dhx57							0.00157978	0.0121478	-4.45889	3.90534	5.76645	-3.63286
Diaph2							0.00528029	0.0255351	3.65452	4.62825	3.07618	2.93237
Diras2							0.00162183	0.0122743	-4.44071	0.96195	4.63441	-12.7503
Dlg1							0.013403	0.0437189	-3.06773	4.45857	5.76828	-2.47891
Dlg3							0.0138644	0.0443855	-3.0468	-0.226599	2.22952	-5.48738
Dmac2							0.0032299	0.0184694	-3.97504	3.03601	4.77472	-3.33736
Dmxl1							0.015943	0.0483195	-2.96064	6.19807	7.60033	-2.64314
Dna2							2.69391e-05	0.00100667	7.80518	4.93506	2.44961	5.6001
Dnajb1							0.00709646	0.0301133	-3.46572	3.84678	5.28716	-2.71392
Dnajb5							0.0117287	0.0404023	-3.15047	1.21515	2.6971	-2.79327
Dnajc14							0.0168947	0.0495044	-2.92497	4.5567	5.60292	-2.06512
Dnajc4							0.00560433	0.0261835	-3.61626	0.161515	1.41782	-2.38882
Dnase1l1							0.0111777	0.0393771	3.18039	1.84904	0.72153	2.18482
Dnase1l2							0.00704136	0.0300247	-3.47067	-0.983002	1.02542	-4.02342
Dock10							0.00623179	0.0279117	3.54837	8.0398	6.44785	3.01455
Dock6							0.00901276	0.0347329	3.31493	1.40045	-0.199737	3.03183
Dock8							0.0167623	0.0494053	-2.92981	5.94938	7.3413	-2.62427
Dok2							8.45375e-05	0.00209378	6.74068	3.52689	0.499541	8.15312
Dok3							0.00108927	0.00966925	-4.71988	3.73019	7.62355	-14.86
Dpy19l1							0.00452588	0.0228439	3.75411	5.11503	3.8154	2.46165
Dpysl2							0.00492735	0.0243202	3.69911	5.67368	4.61676	2.08048
Dse							2.65278e-06	0.000316597	10.3651	3.49084	0.769079	6.59677
Dtx1							0.000110278	0.00244066	-6.5091	-2.25816	3.72949	-63.4546
Dus2							0.0108569	0.0386317	-3.19853	1.5015	3.01517	-2.85535
Dus3l							0.0113847	0.0398868	-3.16898	3.08411	4.39769	-2.48558
Dusp11							0.00766368	0.0316085	-3.41705	5.5341	6.9511	-2.6703
Dusp22							0.00964566	0.0359183	-3.2724	2.66302	3.85466	-2.28413
Dusp3							0.0107234	0.0384096	3.20624	3.29894	1.64537	3.1461
Dync1li2							0.00687033	0.0295832	-3.48627	4.50687	5.79381	-2.44009
Dynll2							0.0105927	0.0381279	3.21388	2.72368	1.63384	2.12849
Dyrk1a							0.0116575	0.0403175	-3.15425	5.36287	6.70349	-2.53261
Dyrk1b							0.00366432	0.0199787	-3.8919	1.07303	3.63236	-5.89437
E2f2							0.000381701	0.00524531	-5.49693	4.2466	7.92626	-12.8141
Eaf2							0.00039441	0.00531705	-5.47166	-1.66603	2.7764	-21.7422
Ecm1							0.00386388	0.020644	3.85715	1.05204	-0.564467	3.06633
Edrf1							0.00534997	0.0256446	-3.64609	3.87967	5.61448	-3.32836
Eef1akmt4							0.0108792	0.0386427	3.19725	1.75311	0.242055	2.85019
Eef2k							0.0141793	0.0450328	-3.03293	3.30017	5.41354	-4.327
Efemp2							0.000603815	0.00685126	5.14916	-0.337589	-4.05498	13.1537
Egfl7							0.00293201	0.0174284	4.03923	4.28944	0.365984	15.1732
Egr1							0.000840123	0.00828455	-4.90647	0.445034	2.08787	-3.1228
Egr3							0.00390943	0.0208475	-3.84948	-2.21998	-0.166658	-4.15061
Eid3							0.00600968	0.0272161	3.57155	0.810794	-1.08851	3.73033
Elac1							0.0015988	0.0122026	4.4506	2.41216	0.712403	3.24846
Elmo1							0.0146225	0.0456461	3.01393	5.83031	4.60195	2.343
Elmod3							0.0129651	0.0429038	-3.08829	1.05496	2.73184	-3.19735
Emb							0.000510189	0.00626943	5.27542	6.19302	3.32244	7.3136
Eme2							0.00688754	0.0296349	-3.48469	3.43096	4.88795	-2.74535
Emilin1							0.00711415	0.0301448	3.46414	2.99315	0.744088	4.75373
Eml5							0.000956026	0.00894437	-4.81317	-0.933538	3.27215	-18.4517
Enah							0.00123517	0.0104234	4.63086	1.43681	-3.7817	37.233
Eng							0.0160237	0.0484121	2.95753	3.01584	0.849626	4.48844
Eno1b							0.000603987	0.00685126	5.14895	6.33013	3.95895	5.17366
Enoph1							0.00495267	0.0243614	3.6958	3.15756	1.53119	3.08735
Enpp4							0.00140807	0.0112773	4.53893	3.23251	0.680012	5.86649
Entr1							0.00428081	0.0220778	-3.79028	4.09439	5.40485	-2.4802
Eomes							2.08502e-06	0.000316597	-10.6672	-4.13904	1.60194	-53.482
Epc1							0.0017531	0.0128026	-4.38703	4.23272	6.1023	-3.65426
Epc2							0.00444985	0.0225704	-3.76511	4.41805	5.98074	-2.95404
Ero1lb							0.00100575	0.00920073	-4.77681	3.71329	5.9083	-4.57891
Errfi1							0.00100325	0.00920073	4.77859	2.30593	-0.658169	7.8034
Esam							2.02396e-05	0.000845509	8.09002	1.70128	-3.05499	27.0259
Esco1							0.010648	0.0382467	-3.21064	4.48436	5.85524	-2.58627
Espl1							0.00612204	0.0275694	3.55971	4.97108	3.37851	3.01586
Esrra							0.0117677	0.040493	-3.14841	2.6934	3.82319	-2.18828
Etfb							0.0033642	0.0189666	3.94814	4.21485	2.8684	2.54286
Ets2							4.85834e-05	0.0014575	-7.24192	2.87698	5.56619	-6.44959
Evi2b							0.00862828	0.03395	3.34232	4.63557	3.40708	2.34322
Evi5l							0.0168329	0.0495044	-2.92722	2.02932	3.18533	-2.2284
Eya2							0.0164754	0.0489833	-2.94042	-1.8563	-0.046477	-3.506
Ezh1							0.0147299	0.0457357	-3.00941	3.72771	4.99186	-2.40185
F630028O10Rik							0.00205633	0.0140384	4.27789	4.95404	-0.146563	34.311
F730311O21Rik							0.0121533	0.0414186	-3.12838	0.899201	3.41978	-5.7381
F8a							0.0014925	0.0116876	-4.49835	0.753423	2.31612	-2.95405
Fam117a							0.00565106	0.0263194	-3.61094	3.8991	5.62689	-3.31222
Fam129b							0.000844703	0.00829133	4.90252	3.11977	1.00734	4.32419
Fam129c							0.000106951	0.00239795	-6.53551	2.28171	9.64682	-164.862
Fam160b1							0.0142974	0.0452056	-3.02781	4.21182	5.69735	-2.8002
Fam160b2							0.0037381	0.0202428	-3.87882	2.18912	3.87584	-3.21924
Fam169b							0.00981775	0.0364014	-3.26134	-0.165386	4.29413	-22.0013
Fam193b							0.00296941	0.017569	-4.0308	4.67287	6.55982	-3.69854
Fam198b							1.67165e-05	0.000803145	8.28502	1.38628	-4.0317	42.7539
Fam20b							0.00440877	0.0225016	-3.77113	4.18177	5.64319	-2.75378
Fam214a							0.00853376	0.033661	-3.34925	3.47319	5.18052	-3.26554
Fam234a							0.0027491	0.0168226	4.08216	2.09939	0.1996	3.73159
Fam32a							0.0100817	0.0369392	-3.24475	4.48725	5.75446	-2.40696
Fam89b							0.000906196	0.0086693	-4.8517	2.42689	3.82783	-2.64073
Fam8a1							0.00510475	0.0249574	-3.67629	3.34669	4.83212	-2.8
Farp1							8.01652e-05	0.00202473	6.78762	2.22248	-2.7326	31.0191
Fat4							0.00172234	0.0127204	4.39922	1.05685	-1.87642	7.63843
Fbl							0.0166727	0.0492549	2.9331	3.06851	1.81227	2.38871
Fbn1							3.4645e-05	0.00120316	7.561	4.2094	-0.205297	21.3284
Fbxl8							0.00584157	0.0267007	-3.58969	0.877543	2.16617	-2.44295
Fbxo17							0.00100986	0.00920073	4.77389	1.06766	-1.60589	6.37996
Fbxo25							0.0019801	0.0137643	-4.30363	1.40413	3.02401	-3.0735
Fbxo28							0.00453511	0.0228544	-3.75279	3.39673	4.83619	-2.71218
Fbxo32							0.000681638	0.00745342	-5.05935	2.90681	4.49915	-3.01537
Fbxo33							0.00632301	0.0281169	-3.5391	3.58691	5.33502	-3.35919
Fbxo46							0.000917126	0.00874259	-4.84306	2.48267	4.15213	-3.18097
Fcer1g							0.00715177	0.0302447	3.4608	3.1982	0.881993	4.98021
Fcgrt							7.9811e-05	0.00202378	6.79155	3.38827	-1.65875	33.0601
Fcmr							1.32322e-05	0.000695123	-8.52838	-1.95674	4.83555	-110.836
Fcna							1.37818e-06	0.000253307	11.2044	2.68995	-2.40212	34.1089
Fcrla							0.000293372	0.00445994	-5.70252	1.05447	8.65759	-194.432
Ffar1							0.0034576	0.0192615	-3.93009	-1.3527	2.15332	-11.361
Fgd3							0.000391001	0.00529994	-5.47835	3.50185	5.77656	-4.839
Fgfr1							0.00449312	0.0227324	3.75883	2.7568	-1.06162	14.1078
Fggy							0.0122844	0.0415895	3.12173	3.11819	0.284594	7.12848
Fhl3							0.00016252	0.00305744	6.18108	1.77087	-0.717359	5.61088
Ficd							0.0100991	0.0369606	-3.24367	1.01786	2.40463	-2.61493
Filip1							0.000687812	0.00748743	5.05271	1.46243	-2.07826	11.6374
Fkbp1a							0.012349	0.0416633	3.11847	4.26475	2.74445	2.8685
Fkbp5							0.000547431	0.00653847	5.22242	5.90466	2.92577	7.88382
Fkbp9							6.5333e-06	0.000447921	9.29842	1.79608	-4.13547	61.0343
Flad1							0.0102166	0.0372203	-3.23645	3.00048	4.35391	-2.5552
Flt1							1.49576e-05	0.000752593	8.40007	2.36044	-3.88546	75.8938
Flt3							0.00256591	0.0160589	4.12832	5.87294	2.3824	11.2398
Flt3l							0.00944806	0.0354719	-3.28536	1.12494	2.57929	-2.74034
Fn1							0.00325536	0.0185667	3.96985	3.78656	-0.623214	21.2557
Fndc10							0.00137571	0.0111135	4.55518	-0.524712	-3.2245	6.49708
Fnip2							5.77539e-05	0.00163295	7.08266	4.18042	-0.798468	31.535
Foxn3							0.00106745	0.00953985	-4.73429	5.00971	7.73021	-6.59104
Foxo4							0.00657923	0.028756	-3.5138	2.42767	4.00903	-2.99252
Foxp1							0.0056192	0.0262093	-3.61456	5.98021	8.88106	-7.46867
Foxred2							2.42342e-05	0.000950039	7.90967	4.0785	1.98253	4.27513
Frat1							0.00174063	0.0127615	-4.39194	0.740649	3.3584	-6.13792
Frrs1							0.0026474	0.0164082	4.10737	1.94134	0.0933018	3.60009
Fstl1							0.000110384	0.00244066	6.50828	3.01414	-2.66176	51.1229
Fut4							1.33724e-05	0.000695123	8.51728	3.08614	0.0691824	8.0946
Fuz							0.0091949	0.0350139	-3.30238	1.6923	3.19873	-2.84106
Fxyd5							1.02011e-05	0.000587253	8.80594	4.92316	1.75539	8.98661
Fyb							0.00094952	0.00889653	4.81807	4.22555	2.11927	4.30579
Fzd7							0.0092347	0.0350326	3.29967	0.902549	-1.27202	4.5145
Gabarapl2							0.00178484	0.012931	-4.3747	2.83858	4.32709	-2.80599
Gadd45a							0.000297671	0.00446506	-5.69103	1.01019	4.05383	-8.24571
Gadd45b							0.00446041	0.0225848	-3.76357	1.26225	3.62556	-5.1455
Galnt3							9.29624e-05	0.00219671	6.65727	2.09616	-2.49938	24.1766
Galnt4							0.0012195	0.010349	-4.63986	3.19246	4.89947	-3.26484
Gas2l1							0.000609266	0.00687392	5.14247	2.1235	-1.65781	13.7494
Gas6							0.00024565	0.00399721	5.8438	1.21069	-1.87987	8.51825
Gata1							0.00560267	0.0261835	3.61645	0.454963	-3.09746	11.7324
Gba2							0.0159898	0.0483904	-2.95883	3.14342	4.27782	-2.19527
Gbp4							0.00988612	0.036558	-3.257	1.89413	4.31669	-5.36119
Gbp9							6.9125e-05	0.00181773	-6.91983	3.36246	6.57738	-9.28513
Gcc1							0.0123845	0.0417349	-3.11669	3.01278	4.25955	-2.3731
Gch1							0.000727458	0.00767072	-5.01151	1.40074	3.1311	-3.31813
Gclc							0.0108313	0.0386011	-3.2	4.10837	5.96293	-3.61642
Gcsam							0.000209056	0.00361045	5.97405	2.61881	-4.92795	186.982
Gcsh							0.0168565	0.0495044	2.92636	3.23737	1.01404	4.66972
Gdap2							0.00931846	0.0352337	-3.29401	3.11629	4.17405	-2.08169
Gdi1							0.00123821	0.0104245	-4.62912	4.61225	6.70631	-4.26948
Gdpgp1							0.0122881	0.0415895	-3.12154	1.43512	3.30584	-3.65716
Ggt5							0.00820802	0.0331328	3.37375	1.36588	-1.47069	7.14318
Glipr2							0.00802196	0.0326084	3.3882	3.90991	2.718	2.28456
Glis2							0.000434924	0.00563725	5.39662	0.761231	-2.72611	11.2149
Gm10257							0.00288705	0.0173712	-4.04951	0.60411	2.55122	-3.85603
Gm10291							0.0128673	0.0426669	3.09299	0.279416	-1.14833	2.69026
Gm10359							0.0126984	0.0423379	3.10117	3.60213	2.29497	2.47454
Gm1043							4.41006e-05	0.00138139	-7.33223	-1.17641	2.23246	-10.6212
Gm11127							0.0169449	0.0495097	-2.92315	-3.34533	-1.76976	-2.98055
Gm11249							0.0145282	0.0455296	3.01792	1.93147	0.431384	2.8286
Gm11346							0.00528285	0.0255351	-3.65421	-0.711676	1.35684	-4.19454
Gm11451							0.0131823	0.0433306	3.07801	0.815613	-1.35211	4.49315
Gm12070							0.013219	0.0434068	3.07629	3.51686	2.1224	2.6289
Gm12345							0.00152186	0.0118594	-4.4848	1.47519	3.28082	-3.49581
Gm12537							0.0098441	0.0364237	3.25966	3.31879	1.8785	2.71375
Gm12663							0.0131802	0.0433306	-3.07811	1.81032	3.50913	-3.24633
Gm12671							0.0160328	0.0484166	2.95718	3.60055	2.19426	2.65056
Gm12966							0.0116599	0.0403175	-3.15412	4.89829	6.04826	-2.21908
Gm13012							0.00645853	0.0284452	-3.52559	0.549867	3.25387	-6.51607
Gm13212							0.00762272	0.0314862	-3.42043	0.608906	3.49425	-7.38882
Gm13416							0.00755413	0.0312838	3.42615	0.609807	-0.922117	2.89171
Gm13464							0.00772042	0.031787	3.41238	1.56488	-0.0127532	2.98479
Gm13597							0.00534972	0.0256446	-3.64612	0.076075	1.60694	-2.88959
Gm13991							0.00545712	0.025965	-3.63334	1.3961	2.64748	-2.38068
Gm14296							0.0116688	0.0403265	3.15365	2.93077	1.037	3.71605
Gm14636							0.00424509	0.0219645	3.79573	3.26321	1.38024	3.68833
Gm15232							2.57935e-05	0.000981074	7.84796	0.886622	-2.19012	8.4371
Gm15472							0.000211241	0.00362939	5.9656	-0.39803	-4.20122	13.9597
Gm15675							0.00188322	0.0133708	-4.33791	1.19134	4.15855	-7.82024
Gm16638							0.00823209	0.0331638	-3.3719	0.207623	1.9267	-3.29226
Gm17383							0.00934519	0.035269	3.29222	2.12875	-0.977778	8.61307
Gm18025							0.0106328	0.0382138	3.21153	0.090377	-1.41518	2.83934
Gm18180							0.00341516	0.019159	-3.93822	-0.688987	0.982678	-3.18582
Gm18588							0.00424232	0.0219645	-3.79616	2.49539	4.13947	-3.12549
Gm19325							0.00825721	0.0331638	-3.36998	-1.2169	1.15248	-5.16719
Gm2058							0.00284319	0.0172208	-4.05971	0.897779	3.01466	-4.33755
Gm20633							0.0120056	0.0410902	-3.13598	0.263515	1.43002	-2.24467
Gm20634							1.85696e-05	0.000841557	-8.17738	1.20756	4.47841	-9.65218
Gm20689							0.00212874	0.0142586	4.25436	1.5256	0.0473635	2.78609
Gm21985							0.0131142	0.0432179	-3.08122	-1.7533	1.73533	-11.2249
Gm23472							0.013769	0.0442254	3.05107	4.56587	2.17415	5.24781
Gm23849							0.015796	0.0480878	2.96634	7.43361	5.06549	5.16269
Gm24119							0.0108289	0.0386011	3.20014	3.23076	-0.814273	16.5073
Gm24497							0.0133277	0.0435621	3.07122	7.24763	4.4875	6.77454
Gm2451							0.0171906	0.0498437	2.9143	2.6646	1.19761	2.76444
Gm25360							0.0129847	0.0429462	3.08736	4.7476	1.91393	7.1289
Gm2574							0.0165392	0.0490192	2.93805	2.39659	0.941321	2.74207
Gm25939							0.00962646	0.0358886	3.27365	6.11998	3.61265	5.68564
Gm26601							0.00198851	0.0137815	4.30074	1.16998	-1.05942	4.68936
Gm26621							0.0030292	0.0177158	4.01755	1.86246	0.442111	2.67651
Gm28042							4.69662e-06	0.000390893	-9.67774	-0.96345	2.94711	-15.0382
Gm28071							0.0118122	0.0405589	-3.14606	-0.286373	1.0722	-2.56431
Gm29488							0.0090804	0.0348184	3.31024	1.61296	-0.199927	3.51344
Gm29666							0.0170512	0.0497037	2.9193	1.56651	-0.576778	4.41766
Gm29718							0.0137918	0.0442641	3.05005	-0.138034	-1.85146	3.2794
Gm2996							0.00981726	0.0364014	-3.26137	-3.38066	-1.05777	-5.00332
Gm30054							0.000141335	0.00284004	-6.29791	-0.0414219	3.52662	-11.8601
Gm32687							0.00824726	0.0331638	-3.37074	1.31471	3.38765	-4.20745
Gm33378							0.0143635	0.0452801	-3.02496	-0.515708	1.08591	-3.03484
Gm35339							0.00271516	0.0166986	-4.09046	-0.107691	2.52214	-6.18953
Gm36266							0.00922801	0.0350326	-3.30013	-0.549942	1.12184	-3.18609
Gm37123							0.00118071	0.0101408	-4.6627	0.561405	2.24257	-3.20687
Gm37233							0.00934578	0.035269	-3.29218	-0.0381741	3.07111	-8.62954
Gm3724							0.00325215	0.0185667	-3.97051	1.50173	2.89986	-2.63559
Gm37321							0.00650915	0.0286062	3.52062	1.31695	-0.579956	3.72413
Gm37352							0.00257079	0.0160663	4.12704	2.19499	0.884954	2.47949
Gm37382							0.00391466	0.0208475	3.8486	-1.68572	-3.95122	4.80821
Gm37760							0.00529514	0.0255617	3.65271	2.89949	0.760059	4.40588
Gm37943							0.00750569	0.0312045	-3.43021	0.471685	2.93853	-5.52835
Gm38042							5.86882e-05	0.00163967	7.06801	1.45769	-2.54389	16.0175
Gm38162							0.00157953	0.0121478	4.459	0.574188	-1.66126	4.70908
Gm38336							0.00767164	0.0316085	-3.41639	0.557194	2.21846	-3.16293
Gm42688							0.000836803	0.00826456	-4.90934	1.4953	3.30846	-3.51412
Gm42742							0.00298496	0.0175958	-4.02733	2.5578	3.9771	-2.67456
Gm43039							0.0134207	0.0437542	-3.06692	-0.160372	1.126	-2.43913
Gm43482							0.0170651	0.0497037	2.9188	0.73695	-0.631128	2.58126
Gm43484							0.00340542	0.0191218	3.9401	2.85173	0.839832	4.03314
Gm43533							0.00445538	0.0225772	3.7643	0.874442	-1.95052	7.08595
Gm43668							0.0136686	0.0441345	-3.0556	1.78258	3.60638	-3.54014
Gm43775							0.00115927	0.010024	4.67567	1.23244	-2.00851	9.45418
Gm43844							0.00719151	0.0303927	3.45729	0.457676	-1.60487	4.17721
Gm43858							0.0127014	0.0423379	-3.10103	0.09735	1.23914	-2.20655
Gm43890							0.000769711	0.00789478	4.97018	0.580699	-1.03525	3.06512
Gm43982							0.00133474	0.0109144	4.57635	2.64863	-0.336175	7.91617
Gm43984							0.00408974	0.0214446	3.82003	2.74258	0.251094	5.62356
Gm44597							0.00179544	0.012993	-4.37063	1.58824	3.44742	-3.628
Gm44695							0.0115654	0.0402259	3.15918	-0.176605	-2.25506	4.22356
Gm44746							0.00139525	0.0112315	-4.54532	-0.269273	1.92969	-4.59149
Gm44775							0.000565955	0.00660998	-5.19749	-0.820785	1.76129	-5.98799
Gm44861							0.0108618	0.0386317	3.19825	0.149745	-3.39562	11.6751
Gm44937							0.00458394	0.0230459	3.74585	-0.300367	-3.98923	12.8961
Gm45407							0.00353674	0.0194825	3.91519	-0.117301	-2.18149	4.18198
Gm45493							0.0163504	0.0489004	2.94511	1.61903	-0.0199672	3.11449
Gm45606							0.0053718	0.0256546	-3.64347	0.662666	2.08543	-2.68099
Gm45718							0.0114657	0.040119	-3.16457	0.344074	1.96829	-3.08275
Gm45867							5.64457e-05	0.00160306	7.10362	2.14435	-0.50019	6.25295
Gm4691							0.0146805	0.0457038	3.01148	0.364767	-1.21157	2.98211
Gm47657							0.0009467	0.00889327	4.82021	1.692	-0.312748	4.01319
Gm47664							0.000683522	0.00745342	5.05732	1.68907	-0.641213	5.02905
Gm47665							0.00950518	0.0355751	3.28159	1.73719	0.158256	2.9875
Gm48048							0.016505	0.0489833	-2.93932	1.64816	2.82815	-2.26575
Gm48062							0.00726087	0.0305011	-3.45121	-0.696414	1.17417	-3.65682
Gm48114							0.000321334	0.00472028	5.63089	0.771055	-2.53312	9.87768
Gm48161							0.0116784	0.040338	-3.15314	-1.83602	0.444745	-4.85934
Gm48381							0.000273832	0.00428769	5.75711	0.534821	-1.93614	5.54413
Gm48382							0.00385451	0.020644	3.85874	0.63429	-0.991159	3.08538
Gm48569							0.00920792	0.0350165	-3.3015	0.569946	2.00167	-2.6977
Gm48585							0.0110946	0.0391464	3.18504	1.88825	-0.0418635	3.81084
Gm48586							0.00826704	0.0331661	3.36923	1.97515	0.0560688	3.78182
Gm48673							0.00290838	0.0174068	4.04461	-0.0840587	-1.91591	3.55994
Gm48768							0.00154337	0.0119832	-4.47506	-0.45237	1.3201	-3.41639
Gm48870							0.00163329	0.0122994	4.43584	2.18845	0.121902	4.18884
Gm48885							0.00453084	0.0228509	3.7534	1.70137	-1.06411	6.79975
Gm5134							0.0146934	0.0457038	-3.01094	-1.70808	1.73507	-10.8766
Gm5138							0.0115524	0.0402259	3.15988	2.42177	1.04051	2.60496
Gm5424							0.000729362	0.00767812	5.00959	3.70092	0.623173	8.44295
Gm5470							0.00667919	0.0290736	-3.50421	1.65929	3.45403	-3.46954
Gm5559							0.0169402	0.0495097	2.92332	3.47103	2.09481	2.59587
Gm5578							0.00146557	0.0115483	-4.51102	2.65519	4.34478	-3.22565
Gm5812							0.00345313	0.0192544	3.93094	4.52868	2.71777	3.50864
Gm6055							0.00188546	0.0133719	-4.33709	1.82023	3.62365	-3.49046
Gm6085							0.00515546	0.0251285	-3.66992	1.85585	3.28348	-2.69006
Gm6169							0.0101813	0.0371975	3.23861	3.93681	2.81515	2.17598
Gm6211							0.00351859	0.019416	3.91857	0.384528	-1.58915	3.92768
Gm6421							0.00369474	0.020059	-3.88648	0.385751	2.08043	-3.23704
Gm6433							0.01307	0.0431168	3.08331	1.56919	0.0505217	2.86527
Gm6649							0.0145034	0.0454743	-3.01898	0.368346	1.93078	-2.95351
Gm7019							0.00144044	0.0114081	-4.52307	0.390652	2.49829	-4.30985
Gm7054							0.0142719	0.0452056	-3.02891	0.841434	2.11521	-2.41793
Gm7334							0.000872055	0.00846874	-4.87944	0.633527	2.92816	-4.90628
Gm7908							0.00855356	0.0336974	3.34779	0.607733	-0.541413	2.21783
Gm8520							0.0151782	0.0468039	2.99092	0.0935921	-2.04847	4.41393
Gm8566							0.00116935	0.0100702	4.66954	3.36311	1.90945	2.73902
Gm9387							0.00365224	0.0199639	-3.89407	0.824212	2.6999	-3.66976
Gm9791							0.000822465	0.00815527	-4.92189	-0.777148	1.50261	-4.85596
Gm9923							0.0138612	0.0443855	-3.04695	2.94643	4.2996	-2.55473
Gmds							0.010763	0.0385298	3.20394	2.93769	0.797559	4.40801
Gna15							0.00130222	0.0107256	4.59366	3.31574	1.1836	4.38367
Gnal							0.00836848	0.0333799	-3.36155	-1.08773	0.55324	-3.11875
Gng10							0.000487506	0.00607245	5.3098	5.68028	3.97399	3.2632
Golm1							0.00975005	0.0362437	3.26566	4.31619	2.8009	2.85855
Gpank1							0.00580379	0.0265755	-3.59385	2.2857	3.83279	-2.92227
Gpbp1l1							0.00923786	0.0350326	-3.29946	5.34879	6.93289	-2.99819
Gpc1							0.016921	0.0495044	2.92401	1.51688	-0.614969	4.3828
Gpcpd1							0.000490729	0.0061007	-5.30481	5.20563	7.65156	-5.44878
Gpd2							0.0130975	0.0431854	3.082	4.07799	3.05903	2.02647
Gpr107							0.00238164	0.0152798	-4.17843	4.05402	5.74944	-3.23871
Gpr132							0.0140673	0.0447658	3.03783	3.13452	1.29604	3.57633
Gpr137b							0.0043273	0.022251	3.78325	3.38632	1.74562	3.11818
Gpr157							0.000335241	0.00483564	5.59774	2.35322	-0.381442	6.65602
Gprasp2							0.000152347	0.00294999	-6.23497	-4.4129	-0.224921	-18.2266
Gprc5b							0.012178	0.0414792	-3.12713	-0.24361	3.40744	-12.5625
Gramd1b							0.000892964	0.00861677	4.86232	3.88633	1.63561	4.75919
Grasp							0.00739754	0.0309158	-3.4394	-0.018303	1.6558	-3.19121
Grb10							0.00121633	0.010349	4.6417	4.48743	-1.68788	72.2692
Gripap1							0.017244	0.0499255	-2.91239	3.32556	4.45434	-2.18673
Gse1							0.00764219	0.0315463	-3.41882	3.95615	6.1037	-4.43076
Gsto1							3.9414e-05	0.00129157	7.43808	3.86682	0.676361	9.129
Gtf2ird1							0.00185123	0.013229	4.34964	1.86604	-0.30429	4.50128
Gtpbp2							0.00128767	0.0107138	-4.60155	4.03667	5.8469	-3.50698
Gucd1							0.00146568	0.0115483	-4.51096	3.59159	4.99695	-2.64885
H2-D1							0.0135475	0.0439915	-3.0611	7.18614	8.78461	-3.02821
H2-M3							0.00467038	0.0233154	-3.73375	3.05974	4.36585	-2.47275
H2-Ob							0.00560549	0.0261835	-3.61613	4.53451	7.12617	-6.0279
H2-Q4							0.00162313	0.0122743	-4.44015	4.83413	7.15815	-5.00726
H2-Q5							0.000887833	0.00859158	-4.86648	-0.0703191	3.92895	-15.9919
H2-Q6							0.00297949	0.0175958	-4.02854	1.84006	5.81456	-15.7197
H2-Q7							0.00340161	0.0191172	-3.94084	1.90418	5.53248	-12.3659
H2-T10							0.00982098	0.0364014	-3.26113	1.99582	3.95785	-3.89611
H2-T23							0.00256394	0.0160589	-4.12883	5.03986	6.88222	-3.58594
H3f3a							0.0124934	0.0419289	-3.11126	7.54989	9.12038	-2.97006
H3f3a-ps2							0.0122077	0.0414868	-3.12561	4.61976	6.23451	-3.06258
H3f3c							0.0167447	0.0493993	-2.93045	4.62075	6.16105	-2.90853
Hacd4							0.000145477	0.00289593	6.27363	2.36864	-2.2245	24.1365
Hba-a1							0.00549769	0.0260016	-3.62859	4.9243	8.07423	-8.87612
Hba-a2							0.00494303	0.024336	-3.69706	3.82111	7.24392	-10.7243
Hbb-bs							0.00247515	0.0157219	-4.1525	6.20039	9.38701	-9.10476
Hbb-bt							0.0049431	0.024336	-3.69705	3.51563	6.71192	-9.16596
Hbp1							0.002365	0.0152496	-4.18315	4.55072	6.61507	-4.18246
Hcfc2							0.011242	0.0395792	-3.17683	3.19075	4.42644	-2.35493
Hdac10							0.00303027	0.0177158	-4.01732	2.99993	4.81182	-3.51102
Heatr3							0.00549065	0.0260016	3.62941	4.41065	2.49801	3.76497
Heatr6							0.00535767	0.0256446	-3.64516	3.74891	5.51957	-3.41208
Hectd3							0.00630178	0.0280616	-3.54125	3.49318	4.86752	-2.59249
Hecw2							0.000189853	0.00340776	6.05273	0.753866	-3.88546	24.9217
Hexa							0.000106626	0.00239795	6.53813	4.43401	2.8751	2.94631
Hgsnat							0.00184932	0.013229	4.35035	2.77901	0.390952	5.23451
Hip1							0.00100394	0.00920073	4.7781	4.56732	1.92136	6.25912
Hivep1							0.00558246	0.0261818	-3.61877	4.65892	6.62899	-3.91786
Hivep2							0.00107198	0.00954035	-4.73127	4.72009	6.63347	-3.76692
Hpgd							2.82637e-06	0.000322509	10.2868	1.24148	-3.7817	32.5184
Hsd17b12							0.00243043	0.0154995	4.16477	4.74316	3.06312	3.20438
Hsdl1							0.00173114	0.0127204	-4.39571	3.85628	5.74291	-3.69769
Hspa9-ps1							0.0164535	0.0489833	2.94124	1.98393	0.0910778	3.71369
Hspb11							0.00335479	0.0189541	3.94998	0.671156	-0.848666	2.86756
Htt							0.0159938	0.0483904	2.95868	6.10281	4.87936	2.33504
Hvcn1							0.00291716	0.0174212	-4.0426	4.21893	6.98224	-6.78949
Icam2							0.0123899	0.0417349	-3.11642	2.4133	4.62157	-4.6212
Id3							0.0122473	0.0415174	-3.1236	1.49103	4.2287	-6.66996
Idnk							0.00172548	0.0127204	-4.39796	2.7607	4.50636	-3.35349
Iffo1							0.0018388	0.0132281	-4.35426	2.72604	4.36015	-3.10396
Iffo2							0.0028569	0.0172711	4.0565	0.852728	-0.716431	2.96732
Ifitm2							3.08742e-08	6.5762e-05	17.4013	4.6769	0.242373	21.6235
Ifngr1							0.0110676	0.0390947	3.18655	6.32978	5.03684	2.45027
Ifrd2							0.00732586	0.0306966	3.44556	3.3033	1.20834	4.27214
Igfbp4							0.00111739	0.00982135	4.70176	4.52708	1.29292	9.40979
Igfbp5							3.77244e-06	0.000378371	9.93667	3.89441	-2.26251	71.3537
Ighd							0.00433974	0.022251	-3.78139	2.07488	5.79401	-13.1695
Ighg1							4.79239e-05	0.00145169	7.25462	3.52514	-2.05876	47.9648
Ighm							0.00129195	0.0107215	-4.59922	7.64662	11.7898	-17.6696
Ighv1-55							0.000351846	0.00499706	-5.56006	-1.52654	3.00745	-23.1668
Iglc1							0.014053	0.0447427	-3.03846	2.46717	6.41463	-15.4277
Iglc2							0.00367659	0.0200114	-3.88971	1.28885	6.10991	-28.2672
Iglc3							0.00195967	0.0137199	-4.3107	0.919435	5.91284	-31.8539
Igsf10							0.00376921	0.0203255	3.87339	1.60352	-2.13688	13.3651
Igsf3							0.00269703	0.0166424	4.09494	1.84296	0.0191498	3.54016
Ikbip							0.00951104	0.0355751	3.2812	2.62217	1.55551	2.09458
Ikzf3							0.00185213	0.013229	-4.3493	0.945642	7.20537	-76.6239
Il16							0.00346044	0.0192615	-3.92954	6.21719	8.30009	-4.23659
Il17rd							0.000934152	0.00883023	4.82981	-0.607421	-3.2817	6.38322
Il18rap							0.00999487	0.0368335	3.25016	4.61223	2.07743	5.79495
Il2rb							0.0139159	0.0445059	-3.04451	1.11458	3.55686	-5.43501
Immp2l							0.00740459	0.0309251	3.4388	1.40001	-0.692937	4.26619
Impact							0.0166277	0.0491675	2.93476	3.66774	2.39866	2.41007
Ing4							0.00311556	0.0180951	-3.99891	3.87565	5.77073	-3.71944
Ino80b							0.00270691	0.0166639	-4.0925	1.46029	2.95727	-2.82253
Ino80c							0.00975864	0.0362545	-3.26511	3.71122	5.01167	-2.46305
Inpp5e							0.0168677	0.0495044	-2.92595	2.7727	3.93614	-2.23992
Insig1							0.00689329	0.0296349	-3.48416	3.49915	4.70436	-2.30572
Ip6k1							0.0169186	0.0495044	-2.9241	5.48458	7.07542	-3.01224
Ip6k2							0.0151207	0.0466996	-2.99326	3.5823	5.12991	-2.92333
Iqgap1							0.000995628	0.00918047	-4.78405	7.62706	9.0517	-2.68448
Iqgap2							0.00029136	0.00445691	5.70795	5.8711	3.46254	5.30945
Iqgap3							6.87673e-05	0.00181773	6.9245	3.5341	0.927624	6.09014
Irf1							0.00445051	0.0225704	-3.76501	4.67566	6.43824	-3.39304
Irf2bp1							0.00626105	0.02798	-3.54538	2.60348	4.03123	-2.69026
Irf3							0.0104901	0.0378861	-3.21996	4.19552	5.51621	-2.49785
Irs2							0.0053521	0.0256446	-3.64583	3.40742	5.67373	-4.81089
Isca1							0.016111	0.0485308	-2.95418	3.40791	4.64755	-2.3614
Ist1							0.00406772	0.0213932	-3.82355	5.22986	6.77594	-2.92022
Itga2b							0.000647803	0.00717411	5.09696	4.12527	-0.699468	28.3395
Itga5							0.00141285	0.0112993	4.53656	2.76336	0.207078	5.88189
Itgb1							0.00198171	0.0137643	4.30307	6.55562	5.19836	2.56199
Itpkc							0.000317043	0.00466798	-5.64143	1.42479	3.46939	-4.12558
Itpr1							0.000968491	0.00903454	4.80386	7.40627	5.80182	3.0408
Itpr2							0.00167376	0.0124826	-4.41894	5.40031	7.88616	-5.60166
Itpripl1							0.00332144	0.0188101	3.95658	4.35223	2.85708	2.81892
Itpripl2							0.00478332	0.0237894	3.71828	3.4358	1.72097	3.28257
Jdp2							1.67011e-07	8.20922e-05	14.3364	2.69542	-1.71604	21.2805
Jmjd7							0.000509731	0.00626943	-5.2761	0.848476	2.92457	-4.21665
Jpt2							0.00255881	0.0160589	4.13018	4.91746	3.0134	3.74263
Jun							0.0164618	0.0489833	-2.94093	4.47144	7.22376	-6.73801
Junb							0.000357162	0.00503811	-5.54841	3.3358	5.96492	-6.18646
Kat2b							0.00578937	0.0265571	-3.59544	3.77891	5.00142	-2.33352
Kat2b-ps							0.00704839	0.0300247	-3.47003	0.0650189	1.42164	-2.56085
Kat5							0.0168733	0.0495044	-2.92575	3.13948	4.30118	-2.23721
Kat8							0.0132381	0.0434471	-3.07539	2.48655	3.91673	-2.6948
Kbtbd2							0.00575688	0.0265032	-3.59905	4.53596	6.07349	-2.90299
Kcnk6							0.000547332	0.00653847	5.22255	3.56646	1.06786	5.65136
Kcnn4							0.0136365	0.0441139	3.05705	3.33925	1.81809	2.87022
Kctd3							0.000169675	0.00317024	-6.14533	3.18421	6.91237	-13.2522
Kctd7							0.0160226	0.0484121	-2.95757	0.798235	2.27914	-2.79123
Kdelc1							0.000565994	0.00660998	5.19743	2.63197	-0.00582675	6.22379
Kdelc2							0.0016323	0.0122994	4.43626	1.6949	-1.32947	8.13628
Kdm3a							0.00130201	0.0107256	-4.59378	4.19872	5.99399	-3.47079
Kdm4a							0.0102454	0.0372823	-3.23469	4.6203	6.12194	-2.83164
Kdm4b							0.00203385	0.0139595	-4.28537	3.3718	5.2728	-3.73472
Kdm5b							0.000121907	0.002588	-6.4232	1.52242	6.56279	-32.9081
Khk							0.00539105	0.0257273	3.64117	1.8314	0.223833	3.04737
Khnyn							0.0014982	0.0117179	-4.49569	4.808	6.80887	-4.0024
Kif13b							0.0084334	0.0334717	-3.35669	3.96633	5.34778	-2.60529
Kif16b							0.0161517	0.048615	2.95263	4.16844	2.99556	2.25461
Kif1b							0.00221338	0.0146441	4.22793	4.4369	2.89588	2.91001
Kif21b							0.00119363	0.0102358	-4.65501	5.18699	7.35256	-4.48642
Kif7							0.00168298	0.0125341	4.41515	0.577644	-2.63546	9.27347
Kifc2							0.00102825	0.00931988	-4.76099	-1.54732	0.942029	-5.61526
Kifc3							0.00203812	0.0139738	4.28394	0.84605	-1.4634	4.95695
Kit							0.000604176	0.00685126	5.14872	4.45017	1.0123	10.8369
Klc2							0.000282724	0.00435326	-5.73176	1.10674	3.28482	-4.5255
Klc4							0.00161505	0.0122713	-4.44361	1.70708	3.71792	-4.03016
Klf11							0.0133873	0.0437137	-3.06846	2.86069	3.95295	-2.13207
Klf2							1.91214e-05	0.00084406	-8.14759	1.59783	5.94139	-20.3023
Klhl28							0.0113532	0.0398422	-3.1707	4.07572	5.42351	-2.54522
Klhl3							0.00444432	0.0225704	3.76592	-0.294431	-3.43363	8.81033
Kmt5b							0.0019603	0.0137199	-4.31048	4.82903	6.61045	-3.43764
Krtcap3							2.16199e-05	0.000874374	-8.0236	-0.17621	2.15885	-5.04572
Kyat1							0.0134764	0.0438242	-3.06435	0.556328	2.32461	-3.40648
Lama4							3.56768e-06	0.000372995	10.0035	2.19821	-3.63546	57.031
Lamb2							6.01784e-05	0.0016575	7.04516	2.29966	-0.971136	9.65178
Lbh							0.00049278	0.00611075	-5.30165	5.06176	6.70998	-3.13447
Ldlr							0.00284615	0.0172224	4.05902	3.40349	1.74971	3.14656
Ldlrap1							0.00629314	0.0280427	-3.54212	2.68864	4.60371	-3.77131
Leng1							0.00841891	0.0334558	-3.35777	1.32042	2.79481	-2.77866
Leng9							3.7409e-05	0.001267	-7.48766	-0.132095	2.4296	-5.904
Lfng							0.000309231	0.00461679	5.66103	4.78965	2.25857	5.78003
Lgals1							0.00898906	0.0346734	3.31659	6.48065	4.90101	2.98894
Lgals8							0.00654209	0.0286918	-3.5174	3.64486	5.13446	-2.8081
Lgalsl							0.000993424	0.00917338	4.78564	3.65187	0.521413	8.7571
Lifr							0.00111619	0.00982135	4.70253	6.5666	3.34184	9.34867
Limd1							0.011631	0.0402829	-3.15567	5.86778	7.33136	-2.75792
Limk1							1.46771e-05	0.000744337	8.41979	3.105	0.550465	5.87479
Lin37							0.00888311	0.0344645	-3.32403	1.27711	2.58254	-2.47157
Litaf							0.00222491	0.0146872	-4.22441	4.68072	6.31365	-3.10143
Llgl2							0.000394087	0.00531705	-5.47229	0.319372	2.44817	-4.37354
Lmbr1l							0.00330034	0.0187293	-3.96079	3.10182	4.93249	-3.55702
Lmbrd1							0.00724329	0.0304504	-3.45274	3.83284	5.24268	-2.65709
Lmbrd2							0.00723808	0.0304504	3.4532	4.47338	3.19463	2.42628
Lmna							6.9986e-07	0.000181056	12.1352	3.05195	-1.5274	23.9068
Lpar5							0.000224392	0.00378328	5.91667	0.76643	-1.84549	6.11319
Lpl							9.96814e-05	0.00229124	6.59645	2.82212	-2.17724	31.9858
Lrch1							0.0143736	0.0452854	-3.02452	4.14285	5.36764	-2.33722
Lrp5							0.000135683	0.00277889	6.33232	4.13942	0.987022	8.89132
Lrrc42							0.000989019	0.00914592	4.78882	1.94205	0.128027	3.51622
Lrrc57							0.00642431	0.0283693	-3.52897	1.27876	2.67138	-2.62556
Lrrc61							0.00904668	0.0347963	-3.31258	2.00031	3.27662	-2.42218
Ltbr							0.00109926	0.00971545	4.71339	2.14984	-1.1117	9.59005
Lyn							0.00148893	0.0116876	-4.50001	6.39414	7.97021	-2.98157
Lynx1							0.0172699	0.0499255	-2.91147	1.36574	5.0518	-12.8711
Macf1							0.00996953	0.0368026	3.25174	8.91225	7.64274	2.4108
Maf1							0.00351606	0.019416	-3.91905	4.48981	6.34155	-3.60935
Mafg							0.00219635	0.0145739	4.23316	4.1583	2.43542	3.30095
Man1c1							0.00422405	0.0219165	3.79897	2.65459	0.932535	3.29905
Manbal							0.0115942	0.0402259	-3.15764	1.38941	2.59183	-2.30125
Maoa							0.00351029	0.0194038	3.92013	1.38154	-2.36125	13.3873
Map1lc3b							0.000329898	0.0048129	-5.6103	4.56287	6.9364	-5.18208
Map2k6							0.0114259	0.0400062	-3.16673	1.42642	3.22848	-3.48718
Map3k1							0.00153145	0.0119195	-4.48044	5.89891	7.59893	-3.24904
Map4k2							0.0138496	0.0443826	-3.04746	5.14255	6.92581	-3.44203
Mapk9							0.0123484	0.0416633	-3.1185	4.26965	5.67043	-2.64044
March3							0.000865815	0.00844142	-4.88464	0.755906	3.18662	-5.3916
Marcks							0.00128938	0.0107141	-4.60063	5.79104	7.68341	-3.71245
Mark3							0.014852	0.0460254	-3.00432	4.98887	6.28895	-2.46243
Mark4							0.00596691	0.0270992	-3.57611	2.21761	3.98531	-3.4051
Mbd4							0.0130105	0.0429649	-3.08613	3.38957	4.81536	-2.68661
Mcam							0.00232771	0.0151313	4.19388	1.35628	-1.93202	9.76957
Mcl1							0.00577373	0.0265235	-3.59717	6.82746	8.16689	-2.53052
Mctp1							0.000888738	0.00859158	4.86574	3.79647	0.548281	9.50172
Mdp1							0.00290925	0.0174068	-4.04441	3.22535	4.70021	-2.77957
Med12l							2.00507e-05	0.000845509	8.0995	3.61477	-0.291956	14.9983
Med13							0.005475	0.0260016	-3.63124	6.75235	8.47079	-3.2908
Megf8							0.000139869	0.00281944	6.30669	1.71959	-1.08412	6.98233
Metrnl							0.0149919	0.046324	2.99854	0.227768	-3.06877	9.82555
Mettl25							0.0100445	0.0368663	-3.24706	1.50686	2.78732	-2.42917
Mettl3							0.0127681	0.0424939	-3.09778	3.337	4.51848	-2.26808
Mex3d							0.0133273	0.0435621	-3.07124	0.620923	2.25214	-3.09774
Mfap1b							0.0123815	0.0417349	-3.11684	3.66838	5.19607	-2.88325
Mfsd12							0.0124292	0.0417977	3.11446	3.6395	2.34847	2.44701
Mfsd2b							0.00556944	0.0261489	3.62027	1.99588	-1.66826	12.6769
Mfsd6							0.016975	0.0495751	-2.92205	3.32643	4.53455	-2.31036
Mgat4b							0.00305991	0.0178565	4.01086	2.78292	0.355047	5.38101
Mgea5							0.0133158	0.0435621	-3.07177	5.96527	7.32191	-2.56087
Mib2							0.0152295	0.0468039	-2.98884	1.80973	3.2245	-2.66617
Micall2							0.00549939	0.0260016	3.62839	0.315972	-2.02061	5.05105
Mlkl							0.000376848	0.005201	5.50682	1.72722	-0.844674	5.94591
Mmp14							0.00133936	0.0109164	4.57393	3.20552	0.763226	5.43505
Mmp9							1.5929e-05	0.000782971	8.3348	5.04573	-0.15472	36.7699
Mon1a							0.0104943	0.0378861	-3.21971	1.62639	3.25931	-3.1014
Mon1b							0.0060346	0.0272902	-3.5689	3.32896	4.88407	-2.93857
Mospd1							0.00571244	0.0264128	-3.60401	2.47371	4.31829	-3.59149
Mpc2							0.00675364	0.0292979	-3.49716	2.89413	4.29339	-2.63767
Mrc1							1.17528e-07	7.21554e-05	14.9294	4.68259	-0.287585	31.3453
Msrb3							0.000242411	0.00397181	5.85445	2.16339	-2.80499	31.3062
Mterf2							0.0102313	0.0372524	-3.23555	1.80273	4.41311	-6.10663
Mtfr2							0.0100882	0.0369419	3.24435	1.40801	-0.248408	3.15233
Mtpn							0.00253031	0.0159612	-4.13769	6.64769	8.02855	-2.60422
Mtss1							0.0152989	0.0469096	-2.98604	5.29218	7.64103	-5.0942
Mtss1l							0.00825356	0.0331638	3.37026	0.147621	-2.45123	6.05802
Mus81							0.0107852	0.0385443	-3.20266	2.11044	3.46865	-2.56367
Mvb12b							0.000624801	0.00699208	5.12377	3.85242	0.81756	8.19567
Mxd4							0.0058042	0.0265755	-3.5938	5.24085	7.33227	-4.26168
Mxi1							0.0134574	0.0438069	-3.06523	2.90908	4.30478	-2.63117
Mylip							0.000260466	0.00415782	-5.79696	3.31146	7.27422	-15.5923
Mynn							0.00880792	0.0342978	-3.32937	3.50811	5.11705	-3.05028
Myo10							0.0159477	0.0483195	2.96046	3.3434	2.11174	2.34837
Myo1c							0.000334008	0.00482992	-5.60062	5.46257	8.1717	-6.53927
Myo1e							4.74314e-05	0.00145017	-7.26423	2.01883	5.58806	-11.8698
Myo6							0.0023795	0.0152798	4.17903	2.64934	0.786286	3.63777
Myom1							1.77005e-05	0.000831663	8.22632	2.2976	-1.24778	11.6752
Narf							0.00549051	0.0260016	-3.62943	4.06197	6.24282	-4.53419
Narfl							0.0152829	0.0468834	-2.98668	2.74439	3.91191	-2.24626
Natd1							0.000555351	0.00658385	-5.21165	2.07127	4.65677	-6.00226
Nbeal2							0.00123646	0.0104234	4.63012	4.50498	2.26258	4.73182
Nbr1							0.00597538	0.0271184	-3.57521	4.89292	6.59508	-3.25387
Ncam1							0.0020792	0.0140743	4.27036	0.368656	-3.38547	13.4929
Ncoa2							0.0115246	0.0402196	-3.16138	5.47355	6.93339	-2.75077
Ndrg2							0.0049932	0.024487	3.69054	-0.585124	-2.9826	5.26882
Ndufaf4							0.0165298	0.0490141	2.9384	3.77688	2.19784	2.98771
Necap2							0.00567365	0.0263736	-3.60838	4.44322	5.5494	-2.15275
Nedd9							0.00151395	0.0118122	-4.48842	5.14261	7.53627	-5.25489
Nek6							0.000782994	0.00791666	4.9577	4.45821	1.11387	10.1565
Neo1							0.00309524	0.0179969	-4.00325	-0.0851051	2.44919	-5.79294
Nf1							0.00813553	0.0329442	3.37934	4.829	3.70476	2.17987
Nfam1							0.00483299	0.023996	3.7116	5.15885	2.39036	6.81394
Nfe2							0.00469824	0.0234362	3.72989	1.97638	-1.04884	8.14105
Nfix							0.00322759	0.0184694	3.97552	2.1504	-0.0730847	4.6702
Nfkbid							8.51015e-05	0.00209781	-6.73482	1.86872	5.04602	-9.0461
Nfkbie							0.000568078	0.00661205	-5.19468	3.764	6.26705	-5.66881
Nfyb							0.0141941	0.0450573	-3.03228	4.04961	5.37925	-2.5134
Nhsl2							0.0126157	0.0421901	3.10522	2.85281	0.657443	4.58005
Nid1							0.000452612	0.00577283	5.3662	3.1584	-0.577685	13.3252
Nid2							0.00104133	0.00938521	4.75196	2.25464	0.171099	4.23846
Nipal3							0.00695241	0.0298361	-3.47873	3.40417	5.08651	-3.20949
Nit1							0.0149225	0.0461991	-3.0014	2.54541	3.60721	-2.08753
Nlgn2							0.000200353	0.00351529	6.00869	2.52371	-2.5399	33.4424
Nlrx1							0.000228571	0.00381742	5.90176	2.8609	0.30996	5.86015
Nme4							0.00319081	0.0183853	3.9831	1.94277	-1.07091	8.07619
Nmnat3							0.00104814	0.00940674	4.74731	1.78898	-0.741547	5.77782
Nol4l							0.000713387	0.00759757	5.02585	1.70521	-1.67936	10.4437
Nop53							0.00492875	0.0243202	-3.69893	5.21775	6.59388	-2.59571
Notch3							5.92001e-05	0.00163992	7.06009	2.97112	-1.08204	16.6005
Notch4							0.000565054	0.00660998	5.19868	1.43615	-2.30498	13.3719
Nprl2							0.00208651	0.0140939	-4.26798	1.44568	3.51857	-4.20729
Nr1h2							0.00199171	0.0137888	-4.29964	3.55869	5.18186	-3.08052
Nr4a1							0.0136109	0.044082	-3.05821	0.632108	2.11741	-2.79976
Nr6a1							0.0092117	0.0350165	-3.30124	0.315089	2.31178	-3.99083
Nradd							0.0160552	0.0484403	2.95632	-0.261973	-2.0125	3.36482
Nrbp1							0.0102908	0.0373628	-3.23193	4.62608	5.72755	-2.14573
Nrp1							0.000315563	0.0046677	5.6451	3.58696	1.05519	5.78281
Ntpcr							0.00666733	0.0290417	3.50534	2.38298	0.871239	2.85154
Nubpl							0.00336301	0.0189666	3.94837	1.35967	-0.542239	3.73706
Nudt15							0.00204826	0.0140038	-4.28056	1.82167	3.59696	-3.42307
Oaf							0.00299552	0.0176094	-4.02498	0.0223254	3.02598	-8.0203
Oas1b							0.0169168	0.0495044	-2.92416	0.991147	2.70138	-3.27214
Ocel1							0.000726107	0.00766913	-5.01287	1.59811	3.50361	-3.74641
Ophn1							0.00037996	0.00523264	5.50046	1.34777	-1.44581	6.93344
Ormdl3							0.00216734	0.0144113	-4.24217	2.77491	4.65937	-3.69213
Osbpl11							0.00721822	0.0304504	-3.45494	3.63799	4.93048	-2.4495
Osbpl1a							0.0124119	0.041787	3.11532	2.27573	0.582302	3.23424
Osbpl8							0.00590357	0.0268497	-3.58294	6.00765	7.3641	-2.56054
Osbpl9							0.00535228	0.0256446	-3.64581	4.8402	6.46297	-3.07964
Otud5							0.00302746	0.0177158	-4.01794	4.69891	6.36511	-3.17377
Oxct1							0.0131572	0.0432927	3.07919	5.5698	4.00426	2.95987
P2rx1							0.000261561	0.00415782	5.79361	1.93548	-2.308	18.9415
P2rx7							0.0010929	0.00967258	4.71752	3.26157	0.888937	5.17886
P2ry10b							9.73386e-05	0.00226179	-6.61714	1.93241	5.04108	-8.62588
P2ry12							0.000197888	0.00349311	6.0188	2.83164	-0.543202	10.3736
P3h1							0.00180558	0.0130516	4.36677	0.937131	-0.815434	3.36957
Pacs1							0.00359404	0.0196963	3.90462	2.8233	1.14114	3.20907
Pagr1a							0.00210531	0.0141898	-4.26188	1.41602	3.03544	-3.07252
Pam							0.000106465	0.00239795	6.53943	3.016	-1.09782	17.3134
Paqr4							0.00612222	0.0275694	3.55969	0.34231	-1.81877	4.47249
Paqr7							2.01352e-05	0.000845509	8.09525	1.8558	-0.537686	5.25426
Parp6							0.0160603	0.0484403	-2.95613	2.82677	4.38477	-2.94443
Parvb							0.0089912	0.0346734	3.31644	2.60154	-0.339053	7.67724
Parvg							0.00272256	0.016712	4.08864	6.35015	4.99743	2.55394
Paxx							0.00170209	0.0126322	-4.40736	2.06046	3.69943	-3.11443
Pcca							0.0171667	0.0498419	2.91515	2.67018	1.39064	2.42761
Pcdhga10							0.00321733	0.0184549	-3.97762	-1.52203	1.10765	-6.1889
Pcdhga8							0.0135505	0.0439915	-3.06096	-1.20364	0.633925	-3.57405
Pcdhgb4							0.0133109	0.0435621	-3.072	-1.02885	0.834138	-3.63761
Pcdhgb5							0.000427406	0.00558513	-5.40996	-1.20046	1.28945	-5.61741
Pcdhgb6							0.0016013	0.0122026	-4.44952	-1.30943	1.36266	-6.37352
Pcif1							0.0115741	0.0402259	-3.15872	4.56038	5.85355	-2.45066
Pcmtd2							0.00917143	0.0349883	-3.30399	3.89421	5.5967	-3.25464
Pde10a							0.000410285	0.005428	5.4413	1.09261	-2.4365	11.5443
Pde1c							0.0145718	0.0456095	3.01607	-1.16835	-2.82826	3.15998
Pde4b							0.00587675	0.0267849	-3.58585	4.41707	6.97436	-5.88598
Pde7b							0.000146939	0.00291272	6.26524	1.22091	-2.80498	16.2898
Pde8a							0.000161567	0.00305744	6.18597	2.93799	-0.910152	14.4014
Pdgfb							0.00356253	0.0195572	3.91041	1.28371	-1.4322	6.57007
Pdgfrb							4.69054e-06	0.000390893	9.67926	3.29708	-0.646353	15.3848
Pdia3							0.00939833	0.0353891	3.28867	6.73952	5.40555	2.52095
Pdk2							8.70782e-05	0.00210769	-6.7146	-1.54913	1.99052	-11.6289
Pdss1							0.0163297	0.0488974	2.94589	2.55643	0.883764	3.18803
Pdzd2							3.08821e-05	0.00110244	-7.67186	0.521251	3.69501	-9.02395
Peak1							0.00278942	0.0169756	4.07244	4.67013	2.62426	4.12921
Per3							0.00256414	0.0160589	4.12878	2.50323	0.530379	3.92544
Pex6							0.005487	0.0260016	-3.62984	2.64517	4.25552	-3.05325
Pfkfb4							0.00089404	0.00861677	4.86145	2.96536	0.754629	4.6291
Pfkm							0.00555953	0.0261489	3.62141	2.25938	1.05837	2.299
Pfn2							0.0110238	0.0389613	-3.18903	-0.73146	1.36398	-4.27358
Pglyrp2							0.0159257	0.0482987	2.9613	1.55701	-1.16378	6.59233
Pgpep1							0.00399495	0.0211148	-3.83534	2.41143	3.84942	-2.70943
Phactr2							0.00227251	0.0149397	4.21009	4.49227	2.14257	5.09721
Pheta1							0.0054856	0.0260016	-3.63	1.09292	2.43275	-2.53121
Phf1							0.0081677	0.0330536	-3.37685	1.21322	2.98122	-3.4058
Phf8							0.0095814	0.0357802	-3.27658	4.23989	5.47927	-2.36098
Phldb1							6.33988e-06	0.000447921	9.33243	1.91171	-1.07335	7.91758
Phldb3							0.00895338	0.034631	-3.31908	1.6311	3.82451	-4.57385
Phospho2							0.0125395	0.0420202	-3.10898	3.14499	4.50415	-2.56535
Pi4kb							0.00752391	0.0312599	-3.42868	4.08536	5.38412	-2.46017
Pias3							0.0137328	0.044178	-3.0527	2.07814	3.16741	-2.12767
Piezo1							0.00288346	0.017366	4.05034	4.86538	3.44208	2.68197
Pik3ca							0.00397135	0.0210302	-3.83921	5.14066	6.87952	-3.33771
Pik3r2							0.0152808	0.0468834	-2.98677	2.94661	4.14499	-2.29481
Pik3r6							3.89365e-06	0.000378371	9.89894	4.05472	-0.312577	20.6389
Pim2							0.00893638	0.0346082	-3.32028	2.35702	4.97206	-6.12641
Pink1							0.00270098	0.0166435	-4.09396	3.14801	5.25538	-4.30903
Pip4k2c							0.00838683	0.0333905	-3.36017	3.38936	4.64623	-2.38977
Pira2							0.00790474	0.0322945	3.39749	1.4974	-1.11896	6.13198
Pisd-ps2							0.00919931	0.0350139	-3.30208	1.42418	2.82753	-2.64515
Pkd1l3							0.0034791	0.0193149	3.926	2.42011	-0.635171	8.31251
Pkn3							0.000391482	0.00529994	5.4774	0.977462	-1.08394	4.17393
Pla2g16							0.00845699	0.033493	-3.35493	1.56857	3.3544	-3.44817
Pla2g4a							7.40914e-07	0.000182094	12.0543	3.42247	0.238508	9.08797
Pla2g4b							0.000792335	0.00794822	-4.94905	-0.930277	2.39926	-10.0529
Plau							7.1111e-05	0.00183967	6.89442	1.41185	-2.54939	15.5759
Plaur							0.00228049	0.0149767	4.20772	2.05928	-0.942937	8.01231
Plcb4							0.00304961	0.0178126	4.0131	2.72675	0.223175	5.67088
Pld1							0.00272003	0.016712	4.08926	1.20272	-1.51575	6.5817
Plekhf1							0.000149096	0.00291886	6.25302	0.559989	-0.594101	2.22544
Plekhg2							0.00928971	0.0351904	-3.29595	3.1793	4.5523	-2.59007
Plin3							0.0112703	0.0396134	-3.17526	3.32406	4.51806	-2.28787
Plod1							0.000698614	0.00754739	5.04123	2.2606	-0.290519	5.86089
Plxnb1							0.0149781	0.0463209	2.99911	0.0820724	-1.81067	3.71339
Plxnb2							0.000215953	0.00367006	5.9477	5.94444	3.73809	4.61504
Pnkp							0.00712429	0.0301485	-3.46324	3.21728	4.68152	-2.75917
Pnp							0.0105426	0.0380102	3.21684	6.75866	4.17429	5.99753
Pnp2							0.00207549	0.014064	4.27158	3.06696	-2.32412	41.9641
Pnrc2							0.00299217	0.0176058	-4.02572	5.20237	7.03858	-3.57071
Pogk							0.012133	0.0413713	-3.12942	3.08922	4.6418	-2.93341
Pold4							0.00302488	0.0177158	-4.0185	3.12197	4.85203	-3.31741
Polg							0.0108038	0.0385474	-3.20159	4.47775	5.89303	-2.66712
Polg2							0.0143793	0.0452854	-3.02428	1.72203	3.20562	-2.79644
Pou6f1							0.00920006	0.0350139	-3.30203	0.145998	1.99493	-3.60233
Pparg							7.81147e-05	0.00199661	6.81061	0.932212	-4.09746	32.665
Ppfibp1							0.000742251	0.00772076	4.99675	3.66638	1.44313	4.66946
Ppm1d							0.0121244	0.0413642	-3.12986	3.25201	4.92593	-3.19081
Ppm1k							0.00634852	0.0281716	-3.53653	3.65231	5.35435	-3.25361
Ppp1r10							0.00882353	0.0343167	-3.32826	4.75916	6.2534	-2.81716
Ppp1r15a							3.46006e-05	0.00120316	-7.56222	1.69402	5.37838	-12.8559
Ppp1r16b							0.00137051	0.0110855	-4.55783	4.19569	6.57009	-5.1852
Ppp1r35							0.0140487	0.0447427	-3.03864	1.19549	2.59594	-2.63983
Ppp1r37							0.00521547	0.0253243	-3.66247	3.03913	4.50796	-2.76797
Ppp2r3d							0.00536355	0.0256535	-3.64446	1.43329	3.26515	-3.55995
Ppp2r5b							0.00344982	0.0192544	-3.93157	1.47098	3.12036	-3.13699
Ppp2r5c							0.0170675	0.0497037	-2.91871	5.58583	6.62193	-2.05067
Pqbp1							0.00160768	0.0122299	-4.44677	3.27147	5.17604	-3.744
Prdm2							0.014045	0.0447427	-3.03881	4.24428	5.65244	-2.65398
Prf1							0.00115498	0.0100004	-4.6783	-1.70449	1.62453	-10.0492
Prickle1							0.00222728	0.0146876	4.22369	-0.26246	-3.31309	8.28572
Prkcb							0.00302679	0.0177158	-4.01808	5.26688	7.37717	-4.31779
Prkce							0.00604734	0.0273285	-3.56755	2.99756	5.34647	-5.0944
Prkch							0.00458382	0.0230459	3.74587	3.90631	2.47962	2.68829
Prnp							0.00221348	0.0146441	4.2279	4.03688	-0.0454073	16.9392
Prorsd1							0.0163053	0.0488638	-2.94681	2.10365	3.406	-2.46631
Pros1							4.42812e-06	0.000390893	9.74674	3.39361	-2.56877	62.3525
Prr14							0.0019179	0.0135419	-4.32542	3.08284	4.94737	-3.64149
Prune2							1.88305e-05	0.00084406	8.16317	0.783326	-3.88546	25.4358
Psd3							0.00265758	0.0164554	-4.1048	3.27178	5.3463	-4.21205
Psen2							0.00934157	0.035269	-3.29246	2.74613	4.05645	-2.47995
Psmb10							0.0115778	0.0402259	-3.15852	3.75658	4.97865	-2.33282
Pstpip2							0.00256242	0.0160589	4.12923	-0.746196	-4.7817	16.3987
Ptger4							0.00856882	0.0337368	-3.34667	3.11551	5.1059	-3.97344
Ptpn14							0.00193012	0.0136131	4.32108	2.43725	-1.14988	12.018
Ptpn18							0.0036911	0.0200562	3.88712	4.38822	3.03331	2.5578
Ptpn22							0.00120487	0.010293	4.64838	4.55282	1.46311	8.51326
Ptpra							0.0069824	0.0299045	-3.476	4.57926	5.75461	-2.25847
Pvr							0.00464018	0.0232009	3.73795	2.14533	0.506365	3.11443
Pxdn							0.000116478	0.00251008	6.46214	1.92812	-3.40875	40.4162
Pycard							0.000695118	0.00752848	-5.04493	3.8665	5.53603	-3.18112
Pygm							0.0168196	0.0495044	2.92771	2.15112	0.29405	3.62271
Rab10os							0.0165787	0.0491134	-2.93658	2.92599	4.28217	-2.56006
Rab11b-ps2							0.013624	0.0441022	-3.05762	2.47066	3.47384	-2.00441
Rab19							0.000906274	0.0086693	-4.85164	0.896195	2.78742	-3.70951
Rab21							0.0124575	0.0418525	-3.11305	4.44996	5.94978	-2.82808
Rab27a							0.00465724	0.023268	3.73557	3.94625	2.55466	2.62367
Rab3d							0.00671811	0.0291834	3.50051	2.9438	1.20462	3.33846
Rab3il1							0.000786754	0.00792351	4.9542	2.4669	-0.747419	9.28128
Rab5b							0.00337185	0.0189834	-3.94664	4.4658	5.83205	-2.578
Rab8b							0.00237107	0.015258	4.18142	5.87657	4.1944	3.20911
Rab9							0.00723147	0.0304504	-3.45378	2.63503	4.11602	-2.79141
Rabep2							0.0144026	0.0452917	-3.02328	3.2892	4.83332	-2.91626
Rabgap1l							0.00178202	0.0129252	-4.37578	5.16536	7.77436	-6.10083
Rabggta							0.0154653	0.0473065	-2.97937	2.22213	3.53102	-2.47751
Rad52							0.00436489	0.0223491	-3.77763	2.23345	3.93353	-3.24919
Rai14							3.91826e-05	0.0012906	7.44366	3.30008	0.170327	8.75286
Ralgps2							0.000985281	0.00914592	-4.79154	4.69159	7.41588	-6.60835
Ranbp6							0.00922445	0.0350326	-3.30037	3.92999	5.61183	-3.20836
Rap1gds1							0.0170174	0.0496762	2.92052	4.71658	3.63666	2.11392
Rara							0.00140082	0.0112453	4.54254	3.4188	0.853406	5.91916
Rasa4							0.00174147	0.0127615	4.39161	3.97504	2.54147	2.70115
Rasgrp1							0.00556879	0.0261489	-3.62034	2.31575	6.27318	-15.5348
Rassf1							0.0128123	0.0425744	-3.09564	3.42754	4.43773	-2.01418
Rb1							0.00026882	0.00423094	-5.7718	4.44635	6.50181	-4.15677
Rbm38							0.00729967	0.0306069	-3.44783	4.26784	5.76462	-2.82211
Rbm42							0.00659635	0.0288111	-3.51214	3.4329	4.68755	-2.3861
Rbm47							0.00236244	0.0152496	4.18389	3.07181	0.434792	6.22043
Rbpj-ps3							0.00897007	0.0346405	3.31791	3.9371	2.86604	2.10098
Rcan3							0.000185764	0.00335749	6.0706	2.85791	0.959435	3.7282
Rchy1							0.00832936	0.0332862	-3.3645	3.66473	5.03987	-2.59394
Rcn3							3.87405e-05	0.00128933	7.45442	1.4751	-2.4745	15.4507
Relb							0.00233467	0.0151457	-4.19186	2.50625	4.51818	-4.0332
Relt							9.90497e-05	0.00228494	6.60198	4.60062	1.76276	7.14959
Rexo1							0.0143498	0.0452801	-3.02555	3.98459	5.25255	-2.40822
Rflnb							0.00229512	0.0150111	4.2034	3.14351	0.233621	7.51558
Rftn2							0.0164374	0.0489833	-2.94184	0.218994	2.49168	-4.83223
Rfx5							0.00973864	0.0362223	-3.2664	3.60089	5.08006	-2.78789
Rfxank							0.00186287	0.0132706	-4.34535	1.82808	3.69969	-3.6594
Rgs16							0.000629703	0.00703462	-5.11797	-0.973612	2.89388	-14.5959
Rgs4							2.85149e-05	0.00104718	7.74948	1.70086	-4.34747	66.1801
Rhbdd1							0.00958619	0.0357802	-3.27627	3.05064	4.15141	-2.14469
Rhoj							0.000113697	0.0024913	6.48285	2.03822	-3.56309	48.5468
Rin2							0.000742354	0.00772076	4.99665	1.87394	-0.601387	5.56094
Ring1							0.00379362	0.0203879	-3.86916	1.80884	3.11882	-2.47938
Rmc1							0.00378602	0.0203642	-3.87048	3.18989	4.7471	-2.94284
Rnase4							0.00848517	0.0334956	3.35284	3.38391	0.855374	5.76987
Rnf113a2							0.0146447	0.045671	-3.01299	2.08859	3.39037	-2.46533
Rnf122							0.00552283	0.0260532	-3.62566	1.41831	4.81778	-10.5521
Rnf14							0.0128518	0.0426613	-3.09373	3.91908	5.11655	-2.29337
Rnf144b							0.00047608	0.00596507	5.32777	2.03742	-3.05498	34.1165
Rnf150							0.00032444	0.00475498	5.62335	2.90189	-2.32428	37.4311
Rnf167							0.00148546	0.0116754	-4.50163	4.08971	6.17933	-4.25633
Rnf181							0.0167297	0.0493777	-2.931	4.02085	5.21327	-2.28537
Rnf24							0.0041885	0.0217775	3.80447	1.58127	-0.606921	4.55733
Rnf25							0.00929049	0.0351904	-3.2959	2.05136	3.29925	-2.37494
Rnf31							0.0138357	0.0443816	-3.04808	3.31905	4.65808	-2.52981
Rnpepl1							0.00892716	0.0346076	-3.32092	3.62044	5.08144	-2.75298
Rnu12							0.0103062	0.0373974	3.23099	1.88058	-2.12437	16.0549
Rpia							0.00519112	0.0252445	-3.66548	3.02013	4.93797	-3.77858
Rpp25l							0.0115741	0.0402259	-3.15871	1.89355	3.43166	-2.90415
Rras2							0.00916207	0.0349735	3.30463	5.0652	3.91828	2.2144
Rrbp1							0.00116495	0.0100482	4.67221	6.21702	4.46845	3.36026
Rrp1b							0.00374209	0.0202472	3.87813	4.64445	2.30835	5.04936
Rsad2							0.0034774	0.0193149	-3.92632	0.82134	2.92616	-4.30144
Rsu1							0.000234891	0.00390649	5.87978	4.65711	2.8987	3.38325
Rubcn							8.1151e-05	0.00204155	-6.7768	3.57093	6.59248	-8.1204
Runx3							0.00101207	0.00920073	4.77233	3.46452	1.15226	4.96661
S100a1							1.83397e-05	0.000841557	8.19007	1.50172	-1.24379	6.70631
S100a6							0.0139278	0.0445215	3.04399	3.57915	0.801925	6.85532
S1pr1							0.00173189	0.0127204	-4.39541	2.66884	6.12969	-11.0109
S1pr2							6.3369e-05	0.0017158	6.99826	1.9419	-0.539898	5.58594
S1pr4							0.00749764	0.0312045	-3.43089	2.75287	5.58288	-7.11078
Sash1							0.000418717	0.00550396	5.42569	3.6319	1.62082	4.03085
Sash3							0.0075312	0.0312626	-3.42807	5.57917	7.10936	-2.88823
Sbk1							0.00159207	0.0121836	-4.45352	3.17956	7.64661	-22.1165
Scamp1							0.000652261	0.00721098	5.09189	2.39308	-1.02816	10.7126
Scarb1							0.00294025	0.0174612	4.03736	4.00393	2.38398	3.07363
Scn4a							0.00106365	0.00951921	-4.73683	-0.21122	4.3789	-24.0859
Scnm1							0.00669681	0.0291106	-3.50253	1.94652	3.30951	-2.57218
Scyl2							0.0170353	0.049683	-2.91988	4.14872	5.37991	-2.3476
Sdad1							0.0160634	0.0484403	2.95601	5.80189	4.25472	2.92244
Sdf2l1							0.00145936	0.0115269	4.51398	4.1258	2.46745	3.15655
Sdhaf2							0.0033659	0.0189666	-3.9478	3.92406	5.8762	-3.8695
Sec11c							0.000983807	0.00914592	-4.79261	5.1352	7.01588	-3.68248
Sec22c							0.0164822	0.0489833	2.94017	1.85602	0.409598	2.72532
Selenow							0.00545169	0.0259585	-3.63399	3.45662	4.77827	-2.49952
Sema4d							0.0010121	0.00920073	4.7723	5.36718	3.56198	3.49477
2008-09-01							0.000228806	0.00381742	5.90093	1.93325	-1.81066	13.3977
2009-09-01							4.43463e-05	0.00138231	7.32702	6.18586	3.67298	5.70761
Serpinc1							0.0023136	0.0150856	-4.19798	-1.15733	1.70071	-7.25033
Sertad1							0.000297548	0.00446506	-5.69136	1.47751	3.83521	-5.12551
Sertad3							7.93745e-06	0.000497258	-9.08054	0.709673	3.97843	-9.63815
Sestd1							0.00780237	0.0320213	3.40572	1.0101	-0.996776	4.01912
Sgk3							0.0143545	0.0452801	3.02534	5.62427	3.82579	3.47855
Sgms1							0.0135611	0.0439915	-3.06048	4.2841	5.74464	-2.75212
Sgms2							0.00204908	0.0140038	4.28029	1.56337	-2.70122	19.2207
Sh3bp1							0.000358437	0.00504497	5.54564	4.09797	1.42885	6.36043
Sh3glb1							0.00266041	0.0164569	-4.10409	5.23735	6.63772	-2.6397
Sh3pxd2a							0.015494	0.0473715	2.97823	4.82235	3.76174	2.0858
Sharpin							0.00403415	0.0212867	-3.82896	4.1347	5.77915	-3.12628
Shkbp1							0.00846497	0.033493	-3.35434	3.05953	4.16912	-2.15783
Shld1							0.0109378	0.0387431	-3.1939	0.249568	1.54912	-2.46152
Shmt2							0.00705095	0.0300247	3.4698	5.2642	3.52291	3.34334
Shroom2							0.000447476	0.00575327	5.3749	1.36146	-3.46501	28.3734
Siah2							0.00673475	0.0292358	-3.49894	2.30376	3.44749	-2.20952
Sidt1							0.00874897	0.0341316	-3.33359	-3.81869	-0.271959	-11.6862
Siglecg							6.96361e-06	0.000458736	-9.22656	4.01241	8.55527	-23.3098
Sigmar1							0.000113844	0.0024913	6.48175	2.97956	0.989375	3.97287
Sik1							0.0122946	0.0415895	-3.12121	5.01343	7.50373	-5.61894
Sipa1l2							0.000162681	0.00305744	-6.18025	1.86619	5.08912	-9.33685
Sirt7							0.0029295	0.0174284	-4.0398	4.29996	5.9477	-3.13343
Skil							0.0020419	0.0139847	-4.28268	4.63323	6.31306	-3.2039
Skiv2l							0.00874922	0.0341316	-3.33357	4.36355	5.68086	-2.49202
Slamf9							0.0149339	0.046212	-3.00093	0.923916	2.94828	-4.06813
Slc11a2							0.0002268	0.00381382	-5.90804	2.70418	5.12269	-5.34621
Slc12a6							0.000467389	0.0059024	-5.34176	6.13244	8.94482	-7.02443
Slc15a2							0.00518239	0.0252212	-3.66657	0.204211	5.35308	-35.4783
Slc15a4							0.00755223	0.0312838	-3.42631	4.18584	5.54204	-2.5601
Slc16a10							0.00626594	0.02798	3.54488	2.94898	1.16841	3.43563
Slc16a13							0.00273763	0.0167723	4.08495	1.38289	-0.0256795	2.65474
Slc16a7							0.00569565	0.0263878	3.6059	3.02444	-0.417466	10.8672
Slc17a9							0.0169219	0.0495044	2.92398	2.32589	0.109064	4.64869
Slc1a4							5.02385e-05	0.00149314	7.21086	1.96948	-1.14074	8.63515
Slc1a5							0.00317643	0.0183189	-3.98609	4.99704	7.84976	-7.22362
Slc25a13							0.00136462	0.0110799	4.56085	3.12428	0.600424	5.75119
Slc25a51							0.00983404	0.0364196	-3.2603	5.35002	7.3604	-4.02886
Slc2a3							0.000101339	0.00231167	6.58214	5.4032	2.87436	5.77109
Slc35a2							0.0164299	0.0489833	-2.94212	2.26788	3.36663	-2.14169
Slc38a9							0.000549841	0.00655127	-5.21912	4.14183	6.55965	-5.34364
Slc39a11							0.000132216	0.00272536	6.35421	3.15377	0.251091	7.47815
Slc39a14							0.00196375	0.0137291	4.30928	3.88749	1.99617	3.70973
Slc39a6							0.0104095	0.037708	3.22477	4.73846	3.00387	3.32786
Slc40a1							0.000390653	0.00529994	5.47903	4.36565	-0.207085	23.7974
Slc41a1							0.0133877	0.0437137	-3.06844	2.82405	4.18419	-2.5671
Slc45a3							0.0122318	0.0414868	3.12439	-0.2477	-2.03962	3.46275
Slc4a2							0.00997839	0.036814	-3.25119	3.97759	5.15815	-2.26666
Slc6a6							0.015993	0.0483904	2.95871	5.89401	4.83239	2.08727
Slc6a8							0.0020152	0.0138784	4.29164	0.324174	-1.49778	3.53559
Slc7a5							2.96642e-05	0.00108317	7.71095	4.89875	2.08154	7.04801
Slc8a1							0.00040733	0.00540008	5.44686	4.7735	0.750292	16.2595
Slfn5							0.0146004	0.0456218	3.01486	4.61694	2.30439	4.9676
Smpd2							0.00902295	0.0347329	-3.31422	1.83652	3.62545	-3.45559
Snap29							0.000918259	0.00874259	-4.84217	4.20159	6.4743	-4.83231
Snapin							0.0135761	0.0439915	-3.0598	3.24852	4.46902	-2.33028
Snn							0.00513108	0.0250478	-3.67298	5.30712	8.2702	-7.79782
Snora23							0.0102091	0.0372139	3.23691	2.65671	-0.981138	12.4481
Snora81							0.00373371	0.0202362	3.87959	-2.82752	-76.9164	2.00895e+22
Snord22							0.00495615	0.0243614	3.69535	2.45587	-90.3528	8.67349e+27
Sntb1							0.000738403	0.00772076	5.00056	2.09588	-0.684255	6.86916
Snx21							0.000988904	0.00914592	4.78891	0.982936	-3.45122	21.618
Snx32							0.0142898	0.0452056	-3.02813	0.103383	1.51515	-2.66064
Soat1							0.00177735	0.0129095	4.37759	4.82813	3.16605	3.16472
Socs7							0.01662	0.0491674	-2.93505	3.73141	4.8565	-2.18115
Sod1							0.00487021	0.0240685	3.70664	5.14065	4.07921	2.08701
Sox13							0.0170805	0.0497037	2.91825	0.287891	-2.4569	6.70293
Sox4							0.0123363	0.0416633	-3.11911	4.92507	8.58436	-12.6345
Sp100							0.00207477	0.014064	-4.27181	4.37817	6.36381	-3.96039
Sp4							0.011876	0.0407122	-3.14271	3.76654	5.51797	-3.36693
Specc1							7.01569e-05	0.00182981	6.90653	4.46859	1.17035	9.83714
Sphk2							0.0171335	0.0498102	-2.91634	3.09772	4.27278	-2.25803
Spindoc							0.00967693	0.0360137	-3.27037	2.10743	3.36752	-2.3951
Spire1							0.00914033	0.0349114	3.30612	0.947044	-1.27541	4.66686
Spns2							0.00280434	0.0170247	-4.06888	1.1778	3.24916	-4.20285
Spp1							3.07194e-05	0.00110244	7.67698	4.53339	-0.323442	28.9769
Spr							0.000743078	0.00772076	4.99594	1.87634	0.220288	3.15153
Spred1							0.000332232	0.00482491	5.60478	5.10474	2.78831	4.98096
Spred2							0.00504375	0.024697	3.68404	2.61561	0.89038	3.30634
Spry1							0.000734137	0.00769039	5.00481	1.8698	-0.634526	5.67383
Spryd7							0.000209009	0.00361045	5.97424	2.1013	0.243089	3.62558
Spsb1							0.000314492	0.0046677	5.64777	0.820777	-2.2245	8.25508
Spsb2							0.000179291	0.00330165	-6.09978	-0.07968	2.07173	-4.44263
Spsb3							0.00947784	0.0355219	-3.28339	2.68125	3.99903	-2.49282
Spty2d1							0.0023037	0.0150518	-4.20088	4.56729	6.26462	-3.24301
Sqle							0.0158449	0.0481221	2.96444	3.67168	1.65132	4.05684
Sqor							0.00895853	0.034631	3.31872	0.926358	-2.04755	7.85662
Sqstm1							0.010272	0.0373581	-3.23307	5.03373	6.42613	-2.62514
Srebf2							0.00497195	0.0244203	3.69329	5.88291	4.56244	2.49749
Srp14							0.0132678	0.0435221	-3.07401	4.00471	5.37212	-2.58006
Ss18l1							0.00418619	0.0217775	-3.80483	1.25455	2.85812	-3.03893
Ssbp4							0.000867417	0.00844142	4.8833	2.87511	1.34984	2.87841
St5							0.00187107	0.0133067	4.34234	1.77253	-1.2508	8.13038
Stard8							0.0013374	0.0109144	4.57496	2.05596	0.346974	3.26931
Stat6							0.00596477	0.0270992	-3.57634	4.99746	6.24245	-2.37017
Stk4							0.00291202	0.0174068	-4.04378	6.7838	8.51578	-3.32185
Stom							0.0078544	0.0321522	3.40152	3.47925	2.13525	2.53856
Ston1							3.70616e-05	0.00126644	7.49654	3.20219	-2.01251	37.1346
Stx3							0.0082962	0.0331952	3.36702	0.398118	-3.35314	13.4661
Stx5a							0.00289969	0.0174	-4.0466	4.41923	6.1588	-3.33935
Stxbp2							0.00710343	0.0301201	-3.4651	4.35161	5.42567	-2.10536
Sulf2							0.000919409	0.00874259	4.84126	2.43702	-0.819217	9.55486
Sun1							0.00643504	0.0283781	-3.52791	3.72838	4.85501	-2.18349
Supt3							0.000512492	0.00627608	5.27203	1.94745	-0.388435	5.0486
Susd3							0.00196814	0.0137405	-4.30776	2.325	3.83988	-2.85775
Syce2							0.0122879	0.0415895	3.12155	2.10669	0.313728	3.46525
Syf2							0.00811184	0.0329109	-3.38117	4.36666	5.86243	-2.82014
Syk							0.000274175	0.00428769	-5.75612	6.87385	10.3093	-10.8185
Sys1							0.0155344	0.0474496	-2.97663	3.43024	4.83862	-2.65439
Tada2b							0.0135761	0.0439915	-3.0598	3.19357	4.67145	-2.78539
Taf1c							0.0104595	0.0378031	-3.22178	2.4278	3.8752	-2.72716
Taf4b							0.010597	0.0381279	3.21363	3.29091	1.54931	3.34407
Taf7							0.00194493	0.0136873	-4.31586	3.12059	4.97433	-3.61437
Taf8							0.00461548	0.023099	-3.7414	3.64064	5.34913	-3.26819
Taf9b							0.013697	0.044178	-3.05431	0.442108	2.50623	-4.18178
Tapbpl							0.00734665	0.0307433	-3.44377	2.27579	3.66535	-2.61998
Tas1r3							0.0114832	0.040119	-3.16362	-1.01743	0.819791	-3.57322
Tatdn3							0.0065329	0.0286712	3.5183	0.965234	-0.471847	2.70773
Tax1bp3							0.00676669	0.0293346	-3.49593	2.18519	3.60767	-2.68045
Tbc1d1							0.00132039	0.010817	-4.58394	4.77622	6.4414	-3.17153
Tbc1d10b							0.00511229	0.0249752	-3.67534	4.4522	5.51348	-2.08678
Tbc1d17							0.000715424	0.00760659	-5.02375	3.04707	5.05755	-4.02916
Tbc1d31							0.000248404	0.00402869	5.83486	3.80441	2.49664	2.47559
Tbc1d32							0.00397567	0.0210302	3.8385	2.86631	0.551413	4.97569
Tbcc							0.00121032	0.0103257	-4.6452	1.58037	3.22238	-3.121
Tbpl1							0.00678035	0.0293515	-3.49465	3.74103	4.9575	-2.32378
Tcp11l2							0.000276839	0.00430252	-5.74844	2.89452	6.0639	-8.99666
Tef							0.0165023	0.0489833	-2.93942	3.91961	5.23905	-2.49568
Tent5a							0.00845247	0.033493	-3.35527	2.30611	4.51586	-4.62597
Tesk1							0.00107079	0.00954035	-4.73206	1.50554	3.96915	-5.51597
Tfdp2							0.0108041	0.0385474	-3.20157	4.28025	6.46335	-4.5413
Tfeb							0.000303199	0.00453733	-5.67653	2.75436	4.73665	-3.95118
Tfpi							2.68548e-05	0.00100667	7.80825	3.70941	-0.683133	21.0033
Tgfb3							0.00207036	0.014064	4.27326	1.01026	-1.17253	4.54031
Tgfbr2							0.00606785	0.0273893	-3.56539	5.13279	6.83369	-3.25105
Tgfbr3							0.00230934	0.0150732	4.19922	3.70964	0.482504	9.3641
Tgif1							0.00199922	0.0138258	-4.29707	3.38163	5.71836	-5.05155
Tha1							0.0117931	0.0405585	3.14707	0.694495	-1.80767	5.66536
Thap11							0.00292516	0.0174284	-4.04078	2.9	4.47328	-2.97582
Thbs2							0.000529575	0.00639695	5.24733	1.06098	-2.2245	9.75049
Tiam1							0.00121422	0.0103451	4.64293	4.3617	2.78314	2.98672
Timeless							0.0052591	0.0254875	3.65711	4.63729	3.48938	2.21593
Timp2							0.00101297	0.00920073	4.77169	2.46958	-0.220867	6.45515
Tinf2							0.00251275	0.0158661	-4.14237	3.64322	5.08105	-2.70914
Tiparp							0.0011463	0.00993873	-4.68364	3.37893	5.69749	-4.98834
Tjap1							0.015768	0.0480254	-2.96744	2.31017	3.71357	-2.64523
Tk2							0.00122367	0.010349	-4.63746	3.0426	4.96793	-3.79822
Tlr4							0.00361197	0.0197776	3.90135	3.7958	2.30272	2.8149
Tlr7							0.0147784	0.0458506	3.00738	4.1685	1.31999	7.20257
Tm6sf1							8.17981e-05	0.00204976	6.76977	5.30904	3.44923	3.6296
Tm7sf2							0.0149836	0.0463209	-2.99888	2.71959	3.76925	-2.07005
Tmc8							0.00726489	0.0305011	-3.45086	1.67636	3.68328	-4.01924
Tmed10							0.013396	0.0437184	3.06806	5.61974	4.46888	2.22046
Tmed10-ps							0.011129	0.0392463	3.18311	3.28098	2.16377	2.16927
Tmem106a							0.00908964	0.0348184	3.3096	1.61549	0.0946236	2.86964
Tmem109							0.00157128	0.0121477	4.46263	3.72342	2.57062	2.22345
Tmem123							0.00144101	0.0114081	-4.52279	5.80038	7.58565	-3.44681
Tmem127							0.00992004	0.0366411	-3.25485	4.44	5.72099	-2.43005
Tmem132a							0.00753434	0.0312626	3.42781	0.579743	-1.62244	4.60174
Tmem147os							0.0157228	0.0479792	-2.9692	0.241751	1.48011	-2.35929
Tmem154							0.00100483	0.00920073	4.77746	3.69612	0.624124	8.40934
Tmem167b							0.00380726	0.020444	-3.86681	3.6976	5.19814	-2.82948
Tmem176a							8.75151e-05	0.00211027	6.7102	4.61598	0.0236888	24.1222
Tmem176b							0.000115736	0.00251008	6.46762	5.20864	0.735923	22.2035
Tmem184c							0.0131313	0.0432521	-3.08041	3.34049	4.7789	-2.71022
Tmem203							0.0142677	0.0452056	-3.02909	0.502465	1.90723	-2.64774
Tmem205							0.000138866	0.00280809	6.31275	1.33129	-1.69786	8.16327
Tmem214							0.0114916	0.0401265	-3.16316	3.76678	5.16219	-2.63063
Tmem243							0.012998	0.0429584	-3.08673	3.08375	4.58689	-2.83459
Tmem26							0.0145547	0.0455905	-3.01679	2.01159	3.57384	-2.95314
Tmem87b							0.00767211	0.0316085	-3.41635	3.44993	4.92407	-2.77817
Tnfaip8l1							0.00534482	0.0256446	3.64671	0.698867	-1.39115	4.25752
Tnfrsf11a							7.76053e-05	0.00199255	6.81643	3.15395	-3.42794	95.796
Tnfrsf19							0.0146949	0.0457038	-3.01088	2.3676	6.88789	-22.9478
Tnfrsf1b							0.0144705	0.0453934	3.02038	4.54959	3.13409	2.66753
Tnfrsf21							0.000127561	0.00266377	6.38461	3.81662	0.929854	7.39611
Tnip2							0.00429898	0.0221357	3.78753	2.84139	0.889659	3.86839
Tnk2							0.00422553	0.0219165	-3.79874	3.47734	5.32762	-3.60572
Tnnt1							0.00656372	0.0287275	3.5153	-0.337846	-3.88546	11.6934
Tns1							0.00411471	0.0215164	3.81606	4.15297	1.94705	4.61366
Tns3							0.000704214	0.00756948	5.03536	5.34659	3.47817	3.65132
Tob1							0.0147038	0.0457038	-3.01051	1.08628	2.76152	-3.19372
Tob2							0.00214276	0.0143051	-4.24991	3.7813	5.39625	-3.06302
Tom1l2							0.00257383	0.0160663	-4.12625	2.87767	4.94643	-4.19529
Tprgl							0.014297	0.0452056	-3.02782	4.25181	5.67111	-2.67456
Tprn							0.0115963	0.0402259	3.15752	2.35888	1.07546	2.43415
Traf5							0.00185204	0.013229	-4.34934	2.20321	4.37544	-4.50723
Trak1							0.0153063	0.0469099	-2.98574	4.62587	6.09013	-2.75922
Trak2							0.00828199	0.0331661	-3.3681	4.71118	6.11033	-2.63746
Trf							0.000154431	0.00297233	6.22361	4.98053	0.940664	16.4483
Trib1							0.00537158	0.0256546	-3.6435	2.63813	5.19628	-5.8895
Trim12c							0.00758648	0.0313771	-3.42344	4.35205	5.80858	-2.74447
Trim13							0.00638475	0.0282538	3.53291	1.40301	-1.14906	5.86474
Trim21							0.0064286	0.0283693	-3.52855	3.20863	4.37718	-2.24786
Trim26							0.01488	0.0460897	-3.00316	3.96498	5.14533	-2.26632
Trim39							0.00787956	0.0322346	-3.3995	3.78155	5.15384	-2.58882
Trim56							0.00559667	0.0261835	-3.61714	5.03943	6.65976	-3.07445
Trim65							0.00905031	0.0347963	-3.31233	2.62066	4.28374	-3.16691
Trir							0.0164995	0.0489833	-2.93952	3.81639	4.87228	-2.079
Trpm4							0.00558463	0.0261818	3.61852	1.11903	-0.239346	2.56397
Trps1							0.0161902	0.0486849	2.95117	5.37681	4.26561	2.16025
Tsga10							0.00228447	0.0149874	-4.20654	1.50537	4.04954	-5.83271
Tspan14							0.0113699	0.0398759	-3.16978	4.88413	6.30244	-2.67273
Tspan15							0.000153223	0.002958	6.23017	0.681015	-4.63547	39.8492
Tspan9							5.47725e-05	0.00156248	7.1312	1.93458	-2.67235	24.3683
Tspyl1							0.00678474	0.0293515	-3.49424	4.38473	5.77682	-2.62459
Ttc28							0.00350357	0.019386	3.92139	2.10025	0.0884876	4.03275
Ttc5							0.003683	0.0200293	-3.88856	4.00949	5.53526	-2.8794
Ttf1							0.0124346	0.0417977	-3.11419	3.73378	5.234	-2.82887
Ttll12							0.0162737	0.0488212	2.948	3.79527	2.14132	3.14693
Ttpal							0.000724086	0.00766045	-5.01492	4.1772	6.49338	-4.98011
Ttyh2							0.00736763	0.030811	3.44196	1.51569	-0.72084	4.71262
Tuba4a							0.000610659	0.00687392	5.14078	6.03302	3.39369	6.23042
Tubb2a-ps2							0.0130629	0.0431156	-3.08364	-1.22715	0.788955	-4.04492
Tubb2b							0.00378206	0.0203601	-3.87116	2.45673	5.0592	-6.07327
Txk							0.0024788	0.0157294	-4.15151	-1.29674	1.87734	-9.02594
Txnip							0.00679054	0.0293515	-3.4937	6.74655	8.23438	-2.80467
Ubald1							0.00124283	0.0104457	-4.6265	3.37806	5.28157	-3.74122
Ubc							0.00039605	0.00532792	-5.46846	7.14395	9.13619	-3.97852
Ube2h							0.00214464	0.0143051	-4.24931	4.36769	6.54027	-4.50829
Ublcp1							0.00746628	0.031142	-3.43355	2.41511	4.23006	-3.51846
Uck1							0.0110212	0.0389613	-3.18917	3.10556	4.54544	-2.713
Uck2							0.00289553	0.0174	4.04756	6.00775	4.0053	4.00681
Uckl1							0.00439219	0.0224708	-3.77358	2.87184	4.36367	-2.81247
Ugt1a6a							1.06061e-05	0.000605117	8.76394	1.52112	-3.39716	30.2379
Ugt1a7c							1.13942e-05	0.000636048	8.68706	3.62647	-0.499659	17.4618
Umad1							0.00104605	0.00940132	-4.74873	2.07065	4.01551	-3.85
Unc13b							0.000777165	0.00790778	4.96315	0.0743656	-2.65476	6.63051
Unc45a							0.0137456	0.0441822	-3.05212	2.80107	4.40885	-3.04783
Unc93b1							0.00141732	0.0113025	-4.53436	6.26208	8.1896	-3.80401
Urgcp							0.0125788	0.042105	-3.10704	2.37105	3.94682	-2.98095
Usf1							0.000823116	0.00815527	-4.92131	4.06336	5.86888	-3.49554
Usp19							0.0164355	0.0489833	-2.94192	5.25907	6.67017	-2.6594
Usp3							0.0072371	0.0304504	-3.45328	4.89884	6.37332	-2.77882
Uxs1							0.00902232	0.0347329	3.31427	3.12439	1.58302	2.9107
Vamp1							0.000841825	0.00828854	-4.905	3.46743	5.4989	-4.08822
Vaultrc5							0.00200546	0.0138539	4.29495	1.11518	-3.03739	17.7848
Vav2							0.00459601	0.0230684	-3.74414	4.03907	5.60761	-2.96605
Vav3							0.0010354	0.00935815	4.75604	4.43724	2.57104	3.6457
Vcan							0.00866286	0.0340441	3.3398	1.90682	-0.954658	7.26759
Vcl							0.000157891	0.00302072	6.20513	5.46792	3.16288	4.94182
Vdr							0.000771499	0.00790044	4.96849	0.816432	-2.38453	9.19572
Vezf1							0.000600408	0.00685126	-5.15337	4.20532	6.25526	-4.14088
Vgll4							0.00983729	0.0364196	-3.26009	3.67458	5.39806	-3.30233
Vhl							0.00872356	0.0341085	-3.33542	3.28925	4.36686	-2.11053
Vkorc1							0.000263195	0.00417324	5.78865	0.908889	-2.70138	12.2123
Vps18							0.00210899	0.0141898	-4.2607	3.66241	4.93152	-2.41012
Vps33b							0.00440491	0.0224999	-3.7717	3.00984	4.65988	-3.13843
Vps37b							0.0139393	0.0445362	-3.04347	2.33849	3.35933	-2.02911
Vps39							0.0160924	0.0485049	-2.9549	4.21221	5.5136	-2.46465
Vwa5a							0.00172745	0.0127204	4.39718	4.57205	3.01244	2.94775
Wbp1							0.000923283	0.00875644	-4.83824	2.84785	4.73038	-3.68721
Wbp2							0.00867831	0.0340838	-3.33868	3.29849	4.67656	-2.59921
Wdr41							0.00434117	0.022251	3.78117	2.89375	1.70467	2.28007
Wdr45							0.00159029	0.0121836	-4.4543	2.24152	4.18548	-3.84761
Wdr47							0.0077717	0.0319364	-3.4082	1.82052	3.22181	-2.64137
Wdr66							0.00181544	0.0130933	-4.36303	-2.39351	0.752552	-8.85234
Wdr91							0.0109337	0.0387431	-3.19414	3.45894	4.57278	-2.16421
Wdtc1							0.00781932	0.0320497	-3.40435	2.93664	4.80358	-3.64759
Whrn							0.00014358	0.0028761	-6.28465	-1.37947	2.8154	-18.3139
Wipi2							0.0106607	0.0382493	-3.2099	4.71371	6.40156	-3.22177
Wwp1							0.00679079	0.0293515	3.49367	4.2176	2.77583	2.71654
Wwp2							0.00951461	0.0355751	-3.28096	4.91308	6.45667	-2.91519
Xab2							0.0158282	0.0481172	-2.96509	4.24579	5.45249	-2.30809
Xkr5							0.00280025	0.0170247	4.06986	1.48962	-1.87589	10.3067
Xlr3b							0.00720125	0.0304137	-3.45643	-2.13799	0.499959	-6.22444
Xrcc1							0.00407753	0.0214272	-3.82198	3.57044	5.55427	-3.95542
Yap1							0.00113484	0.00989467	4.69076	0.593315	-2.8455	10.8439
Yipf4							0.0137201	0.044178	-3.05327	3.50157	4.69164	-2.28164
Ypel3							4.23736e-05	0.0013471	-7.36974	2.31129	5.98689	-12.7781
Ypel5							0.00051403	0.00627608	-5.26976	3.65251	5.85617	-4.60646
Ythdc2							0.00396599	0.0210302	-3.84009	3.60505	5.16601	-2.95052
Zadh2							0.0127231	0.0423881	3.09997	2.72478	1.37423	2.5501
Zbtb17							0.016882	0.0495044	-2.92543	3.11197	4.74681	-3.10553
Zbtb18							0.00120312	0.0102917	-4.64941	4.94881	7.23711	-4.88481
Zbtb2							0.0172396	0.0499255	-2.91255	3.06079	4.61	-2.92657
Zbtb22							0.0137034	0.044178	-3.05402	3.46031	4.60392	-2.20932
Zbtb4							0.00701774	0.0299956	-3.4728	3.18325	4.61364	-2.69519
Zbtb43							0.0107769	0.0385443	-3.20314	3.34724	4.64131	-2.45219
Zc3h10							0.00458119	0.0230459	-3.74624	2.6529	4.25061	-3.02661
Zc3h12a							0.00828374	0.0331661	-3.36796	2.42369	3.99053	-2.96255
Zdhhc14							0.000172395	0.00320233	-6.13217	1.64245	4.43713	-6.93877
Zeb2							0.0104478	0.0377825	-3.22248	6.39246	8.56224	-4.49955
[truncated: 764 more rows]

## Sheet: Comparison 2
Probeset ID	p-value	qvalue(p-value)	t	Mean(T-ALL)	Mean(WT T cells)	FoldChange(T-ALL/WT T cells)	p-value	qvalue(p-value)	t	Mean(B-ALL)	Mean(WT pro-B cells)	FoldChange(B-ALL/WT pro-B cells)
0610010F05Rik	0.000993568	0.00181294	4.5911	4.57879	2.88779	3.22881
0610012G03Rik	0.0084189	0.00777029	3.2708	2.9154	1.72976	2.27464
1110004F10Rik	0.00153783	0.00240185	4.30969	5.14994	3.90512	2.36988
1110008L16Rik	0.00081151	0.00159624	4.724	3.26912	2.18274	2.12342
1110032F04Rik	0.000766727	0.00154173	4.76157	2.2773	-0.615822	7.42877
1110038B12Rik	0.000164514	0.000645281	5.83685	4.70567	2.37727	5.02248
1110038F14Rik	0.000172049	0.000656053	5.80387	3.29028	2.25846	2.04461
1110059E24Rik	0.00700816	0.00681325	3.37953	3.71099	2.55865	2.22276
1110065P20Rik	0.000638462	0.00137945	4.88367	1.82703	0.281887	2.91832
1190007I07Rik	0.000441298	0.00111399	5.13447	1.79417	0.268523	2.87917
1300014J16Rik	0.0150148	0.0119094	-2.93101	-0.31401	1.17599	-2.80889
1500009L16Rik	0.0784401	0.0427477	1.95997	2.79039	0.979938	3.50752
1700017B05Rik	0.0191424	0.0142914	2.78931	5.03797	3.79033	2.37452
1700019D03Rik	0.000182153	0.00067945	-5.76201	0.606854	2.39191	-3.44631
1700025G04Rik	0.0366691	0.0235036	-2.41023	1.67786	3.34507	-3.17601
1700056N10Rik	0.0074568	0.00710853	-3.34268	0.56049	1.6393	-2.1123
1810032O08Rik	0.00467336	0.0051295	3.6221	3.37376	2.34742	2.03685
1810034E14Rik	0.0411967	0.0257452	2.34203	0.77528	-0.280647	2.07905
1810055G02Rik	0.0113568	0.00967918	3.09449	0.862945	-0.337728	2.29847
2010016I18Rik	0.0952971	0.049763	1.84193	5.40719	4.28763	2.1728
2010320M18Rik	0.00198919	0.00284588	4.1471	1.82595	0.642108	2.27181
2310001H17Rik	0.000858127	0.00164955	-4.68716	1.02044	2.96445	-3.84775
2310009B15Rik	0.000908885	0.00170828	4.64939	2.28205	0.856056	2.687
2310022B05Rik	0.0689159	0.0386105	2.03766	1.40248	0.307428	2.1362
2310039H08Rik	0.00204361	0.00288799	4.13018	1.99599	0.153635	3.58594
2310043P16Rik	0.00200545	0.0028564	-4.14199	1.43367	3.27492	-3.5832
2410006H16Rik	0.000556635	0.0012662	4.97608	4.55748	2.0673	5.61848
2410015M20Rik	0.00277149	0.00356724	3.94075	4.01221	2.54276	2.76915
2410022M11Rik	0.00181393	0.00267434	4.20511	0.91979	-0.74376	3.16795
2510016D11Rik	0.00590556	0.0060917	-3.48158	-0.437659	1.02039	-2.74736
2510017J16Rik	0.00770219	0.00727143	-3.32347	-0.0926648	0.915143	-2.01085
2610008E11Rik	0.0411098	0.0257111	-2.34327	3.72248	4.86185	-2.20285
2610301B20Rik	0.000800509	0.00158322	4.73302	2.83646	1.55349	2.4334
2610307P16Rik	0.00880348	0.00802642	-3.24441	3.3626	4.89693	-2.89654
2610318N02Rik	0.00140933	0.00226069	4.36534	3.11649	1.83048	2.43853
2610507I01Rik	0.0674612	0.0380045	-2.05042	-0.165381	1.455	-3.07456
2810001G20Rik	0.0242874	0.0170766	-2.65062	1.03016	2.32867	-2.45974
2810002D19Rik	0.000303866	0.000896285	-5.3943	0.206681	2.35168	-4.42292
2810004N23Rik	0.000525264	0.00122264	5.01542	4.66402	3.55285	2.16021
2810025M15Rik	0.0554491	0.0326348	2.16701	-1.85613	-3.13136	2.42037
2810408I11Rik	5.11996e-05	0.00038557	6.73763	1.60072	-0.742769	5.07529
2810428J06Rik	0.000294916	0.000883473	-5.41541	0.33976	1.44193	-2.14677
2810429I04Rik	0.00974411	0.00864982	-3.18454	-3.85756	-0.8113	-8.26065
3110082I17Rik	8.20179e-06	0.000232775	8.3355	1.82752	-0.81114	6.22753
4632418H02Rik	0.00107299	0.0018982	-4.54104	0.385935	2.03407	-3.13428
4632427E13Rik	0.000149988	0.000620783	-5.90527	4.33419	5.53807	-2.30359
4732440D04Rik	0.000210506	0.000731521	-5.65667	2.6849	3.79401	-2.15712
4833421G17Rik	8.52382e-05	0.000467144	-6.33417	-1.15753	1.49403	-6.28349
4930402H24Rik	0.00370786	0.00435617	-3.76234	1.98789	3.91884	-3.81306
4930412F12Rik	0.00320392	0.00394635	-3.85159	-0.234645	1.14768	-2.60689
4930503E24Rik	0.000708992	0.00147182	4.81361	1.23967	-0.487736	3.31131
4930518I15Rik	7.00751e-06	0.00022642	-8.48484	0.328838	1.78152	-2.73717
4930523C07Rik	0.0055704	0.00583063	-3.51655	4.23801	5.49232	-2.38553
4930594C11Rik	0.00202185	0.00286772	-4.13689	0.680301	2.54151	-3.63313
4933404O12Rik	0.00260178	0.00342186	3.97981	2.46668	1.05398	2.66235
4933407K13Rik	0.0611318	0.0352331	-2.10913	0.89488	3.11089	-4.64608
4933421O10Rik	0.0121918	0.010222	3.05287	1.09933	-0.100657	2.29737
5330406M23Rik	1.77958e-05	0.000275421	-7.6294	-0.372456	1.47288	-3.59336
5330426L24Rik	0.00035479	0.000973354	5.28559	2.05788	-3.67952	53.3494
5430427O19Rik	0.0496888	0.0299149	-2.23182	-0.861694	0.285231	-2.21441
5430434F05Rik	0.000438467	0.00110873	-5.13889	0.24212	3.00133	-6.77027
5730455P16Rik	0.000307388	0.000901033	5.38617	3.72223	2.46865	2.38432
5830418P13Rik	0.00170607	0.00257341	4.24383	4.378	2.81438	2.95593
5830428M24Rik	0.00142067	0.00227338	-4.36022	-0.23854	2.22397	-5.51174
5830432E09Rik	0.000345084	0.000960178	-5.30496	1.90429	3.70297	-3.47903
5830444F18Rik	2.61532e-05	0.000307631	-7.29541	2.91735	6.34801	-10.7829
5830462O15Rik	0.000195951	0.000702687	-5.7087	0.687178	3.11298	-5.37327
5930420M18Rik	0.018329	0.0138455	-2.81462	-0.158883	1.04661	-2.30616
5930430L01Rik	0.00819422	0.00761066	-3.2868	1.37003	3.33306	-3.89881
6030442K20Rik	0.000960913	0.00177914	-4.61293	0.0354169	1.2583	-2.33413
6330537M06Rik	0.00754262	0.00717153	-3.33589	-2.1473	-0.70673	-2.71428
6430511E19Rik	0.000929892	0.00173626	-4.63441	2.34134	3.70406	-2.57169
6430590A07Rik	0.0767604	0.0420624	-1.973	0.568415	1.74292	-2.25715
6720464F23Rik	6.74816e-05	0.000433161	-6.51704	-1.52344	1.85915	-10.4295
9130401M01Rik	0.000107348	0.000524781	6.15688	3.07219	1.04033	4.08931
9230112E08Rik	9.53861e-07	0.000135357	-10.5704	2.24587	3.31839	-2.1031
9230116N13Rik	0.000119533	0.000552903	6.0753	0.690666	-1.66377	5.11394
9330020H09Rik	0.00997571	0.00881014	3.1707	1.41603	0.41135	2.00649
9330175E14Rik	0.000191073	0.000693241	-5.72707	-1.47057	1.83238	-9.86929
9430034N14Rik	9.8805e-05	0.000507216	-6.22026	1.99114	3.13599	-2.21122
9430038I01Rik	0.000250122	0.000804059	5.53256	1.97761	0.110699	3.64752
9430091E24Rik	0.00450719	0.0050024	-3.64395	-0.607291	0.842964	-2.73256
9530056E24Rik	0.000482514	0.00116688	-5.07327	-0.792608	1.70034	-5.62926
9930024M15Rik	0.000900803	0.00169871	-4.65525	0.143617	2.29124	-4.43098
9930111J21Rik1	0.000759201	0.00153513	-4.76812	1.99974	4.16562	-4.48739
9930111J21Rik2	0.00106907	0.00189548	-4.54341	2.64234	4.63149	-3.97005
9930120I10Rik	0.00652419	0.00650183	-3.42212	-2.10802	-0.45027	-3.15525
A130012E19Rik	0.000785641	0.00156315	-4.74543	1.85341	2.9767	-2.17843
A130014A01Rik	0.00884824	0.00805799	-3.24141	0.0632505	1.2181	-2.22661
A130048G24Rik	8.99118e-05	0.000480821	-6.29285	1.41465	4.11475	-6.49844
A130050O07Rik	1.16134e-05	0.000254221	-8.01263	3.32015	6.33084	-8.05948
A130071D04Rik	2.56884e-06	0.000172056	-9.48755	5.24918	6.97414	-3.30571
A330023F24Rik	0.00034052	0.000952146	-5.31428	-1.49735	1.23604	-6.65017
A330035P11Rik	0.000970873	0.0017909	4.60619	0.419928	-0.915492	2.52349
A430005L14Rik	0.000626191	0.00136279	4.89669	2.73122	1.29554	2.70509
A430035B10Rik	0.000289461	0.000873903	-5.42862	1.29401	4.53921	-9.48209
A430078G23Rik	0.000667404	0.00142189	-4.85397	3.59012	4.87366	-2.43436
A430093F15Rik	7.43758e-05	0.000443058	-6.44048	0.0303629	3.08055	-8.28322
A430106G13Rik	2.4223e-06	0.000171868	-9.54906	3.37648	6.34546	-7.82982
A430110C17Rik	0.000802435	0.00158414	-4.73143	2.43807	4.0306	-3.01577
A530032D15Rik	0.0113796	0.00969654	-3.09331	-1.32993	0.193257	-2.87425
A530064N14Rik	0.0516338	0.0308231	-2.20916	-0.110384	1.46816	-2.98668
A630019I02Rik	0.000661324	0.00141272	-4.86009	-0.0126477	2.2368	-4.75502
A630072M18Rik	2.76273e-05	0.00030971	-7.24871	2.37327	3.40883	-2.04991
A630081D01Rik	7.4225e-05	0.000443058	-6.44207	0.8011	3.10581	-4.94069
A930015D03Rik	0.0105192	0.00915782	3.1395	1.87018	0.392484	2.78504
A930024E05Rik	6.89501e-05	0.00043417	-6.50005	0.700049	2.50019	-3.48254
AA465934	0.000355881	0.000973712	5.28345	2.96545	0.517786	5.45532
AA467197	0.0106328	0.00922225	3.13318	1.44347	-2.2489	12.9275
AC113060.1	0.0117336	0.0099163	3.07534	-1.434	-4.03597	6.07114
AC113595.1	0.00751821	0.00715334	3.33781	0.534609	-0.916143	2.73351
AC114990.3	0.00196121	0.00281828	4.15599	3.76035	2.21982	2.90903
AC117239.2	0.0013774	0.00223564	4.38	4.30119	2.72809	2.97543
AC121151.1	3.23804e-05	0.000326405	7.11471	3.43268	1.35987	4.20706
AC121783.1	0.00010753	0.000524781	6.15559	0.818422	-1.32279	4.41132
AC122253.2	6.90782e-05	0.000434289	6.49858	4.71661	2.9165	3.48245
AC122453.1	8.01804e-06	0.000230858	8.35688	4.88316	2.57348	4.95771
AC123927.1	0.000263616	0.000830637	-5.49504	0.977759	2.49521	-2.86284
AC123927.2	0.000343305	0.00095791	-5.30858	2.23128	4.32846	-4.2787
AC123927.3	0.000529867	0.00123074	-5.0095	2.69745	4.69803	-4.0016
AC123956.1	1.56718e-05	0.000269564	7.74206	3.55673	1.39563	4.47254
AC124740.2	0.00321988	0.00395721	3.84854	1.09026	-0.070092	2.23512
AC125028.1	6.45529e-05	0.000424652	6.55216	4.89304	3.27505	3.06947
AC129214.1	0.0499502	0.0300301	-2.22873	1.53247	2.82778	-2.45429
AC131339.2	0.00941228	0.00842418	3.20495	1.81858	-1.6409	11.0003
AC132091.1	0.000349017	0.000965239	5.29704	0.638389	-1.90231	5.81869
AC139060.1	0.00076906	0.00154486	4.75956	0.561952	-1.20075	3.39332
AC148013.1	0.000160753	0.000639207	5.85393	5.56243	3.62719	3.82442
AC154187.2	0.0804609	0.0436388	1.94463	3.30629	2.28109	2.03525
AC154306.1	1.72381e-05	0.00027397	7.65751	2.64826	0.511624	4.39736
AC154457.3	0.000146824	0.000615097	5.92112	1.05799	-0.652706	3.27319
AC154540.2	0.000994825	0.00181294	4.59028	4.57532	2.65913	3.77425
AC154542.1	0.00513681	0.00548368	-3.56518	-2.63524	0.808952	-10.8844
AC154707.2	0.00571928	0.00595041	3.50076	2.16721	1.01543	2.22188
AC154912.5	0.000328008	0.000928264	5.34051	3.83751	2.40851	2.69259
AC161530.1	0.000129384	0.000573757	-6.01564	0.334544	1.96797	-3.10249
AC163399.1	5.82013e-05	0.00040751	6.63462	0.902537	-1.60043	5.6685
AC165079.1	0.000285552	0.000870753	5.43825	1.86653	-0.653371	5.73544
AC165958.1	0.0028773	0.00367132	3.91765	0.639298	-0.454284	2.13403
AC167249.1	0.000120767	0.000554735	6.06755	2.19486	-2.34183	23.2102
AC183095.1	0.000174379	0.000661762	5.79399	3.67197	-1.13729	28.037
AC183097.1	0.0123492	0.0103104	3.04536	2.53866	0.444076	4.27104
AC183097.2	0.00399057	0.00459748	3.71767	1.51043	-0.710356	4.66149
AI480526	0.000240111	0.000783285	-5.56182	2.97931	4.0824	-2.14814
AI506816	4.40625e-05	0.000359155	6.85963	5.87229	4.15656	3.28463
AI662270	0.000146911	0.000615097	5.92068	7.10747	5.2846	3.53785
AK157302	0.00570636	0.00594163	3.50211	2.21214	1.16076	2.0725
AW011738	0.0301284	0.0202624	2.52499	3.53799	1.8203	3.28909
AW112010	0.0365502	0.0234539	-2.41213	-0.337195	1.45839	-3.47157
Aaas	0.000116463	0.000547629	6.09498	4.32342	3.02787	2.4547
Aars	0.007203	0.00695164	3.36323	5.72751	4.30978	2.67163
Aars2	0.0744683	0.0410726	1.99123	4.49723	3.43205	2.09243
Aarsd1	0.00107453	0.00190008	4.54011	3.68226	2.3032	2.60098
Aatf	0.00193305	0.00279368	4.16508	4.29956	3.22536	2.10555
Abca1	0.0194304	0.0144548	-2.78061	4.50987	5.84283	-2.51919
Abca13	0.0372523	0.0237936	-2.40099	-1.78626	-0.170687	-3.06434
Abca7	0.0620344	0.0356344	-2.10041	3.7651	4.76913	-2.00559
Abcb10	0.0939851	0.0492787	1.85039	2.55776	0.576856	3.9474
Abcb6	4.87943e-07	9.70057e-05	11.3609	2.71026	-0.0871247	6.95179
Abcb8	0.000548193	0.0012547	4.98643	3.93329	2.58894	2.53916
Abce1	0.00827364	0.00766966	3.28109	6.71286	5.66394	2.06898
Abcg3	0.0023679	0.00319472	-4.03824	2.8004	4.94153	-4.41109
Abhd1	0.00349494	0.00417515	-3.7984	-0.853737	0.592004	-2.72403
Abhd12	0.00167577	0.00254552	4.25517	3.62693	2.52125	2.15201
Abhd14a	0.0149286	0.0118748	2.93437	0.862225	-0.702763	2.95875
Abhd16a	0.00064752	0.00139372	4.87422	3.77569	2.67674	2.14199
Abhd4	8.74234e-05	0.000473246	6.31456	3.03259	0.345408	6.44055
Acaa2	8.3009e-05	0.000461473	6.35475	5.45183	3.4675	3.95679
Acaca	1.88595e-05	0.000284315	7.57834	5.19	3.53294	3.15373
Acadl	0.00326354	0.00399727	3.84029	3.36424	1.83168	2.89299
Acads	0.000481948	0.00116688	5.07407	4.30171	2.50218	3.48107
Acap1	0.00123809	0.00206609	-4.44847	5.94577	6.99072	-2.0633
Acat1	0.00802592	0.00749639	3.29908	4.95906	3.79103	2.24705
Acat2	0.000105292	0.000519059	6.17162	3.92765	2.69896	2.34354
Acbd6	0.000669462	0.00142315	4.85191	3.40998	2.12025	2.44481
Ackr2	0.040193	0.025261	2.35649	-3.20072	-4.43696	2.35584
Aco1	0.000358045	0.000973712	5.27922	4.53557	3.2727	2.39972
Aco2	0.000496864	0.001185	5.05326	6.54852	5.34004	2.31094
Acot2	8.05438e-05	0.000461473	6.37821	2.43264	0.507167	3.79862
Acp1	0.00810525	0.0075492	3.29326	3.989	2.75595	2.35063
Acp5	0.026642	0.018378	2.5967	5.03336	3.9882	2.0636
Acpp	0.0370535	0.0236926	-2.40413	0.993463	3.40042	-5.30355
Acrbp	0.00158546	0.00245215	-4.2903	1.07955	2.25236	-2.2545
Acsf2	0.0188766	0.0141466	2.79746	1.85721	0.069421	3.45286
Acsf3	0.00123515	0.00206308	4.45	2.58627	1.47631	2.1584
Acsl5	0.00430327	0.00486024	3.67194	5.60512	4.14147	2.75805
Actl6a	0.00066251	0.00141297	4.85889	5.53284	4.37725	2.22775
Actn1	0.00555825	0.00582098	3.51786	6.68599	5.63329	2.07441
Adam19	0.0427241	0.0264967	2.32067	5.68836	2.86829	7.062
Adam4	0.000427373	0.00109022	-5.15653	0.0288117	2.64964	-6.15101
Adam9	0.00027459	0.000848502	5.46602	2.90009	1.63167	2.40897
Adamts6	0.000170077	0.000654263	-5.81235	-0.24486	4.81225	-33.2923
Adamtsl2	0.00446398	0.00497575	-3.64977	-1.19507	0.946345	-4.41193
Adck1	0.00461419	0.00508141	3.62979	2.9245	1.6843	2.36232
Adck5	6.95565e-05	0.000434546	6.49314	2.98749	1.98278	2.00655
Adgra2	0.0910887	0.048039	1.86946	-0.987496	-2.07872	2.13054
Adgra3	0.0271897	0.018678	-2.58484	-1.47095	2.03756	-11.3806
Adgrg1	0.00288879	0.00367989	3.9152	3.86918	2.65143	2.32583
Adh5	0.00183592	0.0026996	4.19752	5.59337	4.34897	2.3692
Adi1	0.00364746	0.00430814	3.77235	3.32832	1.93865	2.62017
Adk	0.000690798	0.0014458	4.83095	4.85573	2.81118	4.12546
Adm	0.0344991	0.0224679	2.4459	0.688796	-2.54072	9.37955
Adnp	0.00567216	0.00591377	-3.50571	3.53725	5.32966	-3.46393
Adprhl2	0.00274391	0.00354419	3.94693	3.8224	2.79335	2.04067
Adsl	8.55014e-06	0.000234294	8.29637	5.61507	3.73394	3.68363
Adssl1	0.00123719	0.00206546	4.44893	1.37839	-0.930541	4.95516
Afdn	3.13831e-05	0.000325169	7.14098	6.27528	1.84125	21.6161
Afg3l1	0.0025185	0.00334007	3.99996	4.41146	3.35158	2.08475
Agfg1	0.0162052	0.0126079	2.88646	8.07035	5.48183	6.01481
Agfg2	0.000306683	0.000901033	-5.38779	3.60563	5.34341	-3.3352
Agpat2	0.000677159	0.00142871	4.84427	3.02132	-0.486931	11.3786
Agpat4	0.0134953	0.0110196	2.99339	2.88115	1.40461	2.7828
Agrn	0.00522268	0.00554923	3.55522	3.64508	2.30066	2.53926
Ahcy	0.016458	0.0127603	2.87742	2.63078	0.756499	3.66619
Ahi1	0.0506104	0.0303123	2.22098	4.5273	3.40621	2.17511
Aimp2	0.000255989	0.000817292	5.51599	3.30611	1.47171	3.56622
Aip	0.00695666	0.00677977	3.38391	3.85289	2.59955	2.38392
Airn	0.00400371	0.00460926	-3.71567	1.92459	3.44664	-2.87198
Ak2	0.00157838	0.00244404	4.29314	5.19517	3.91292	2.43219
Ak6	0.000230782	0.000769274	5.59029	5.54871	4.0007	2.92413
Akap1	0.018654	0.0140217	2.80437	3.97341	2.67665	2.45677
Akap7	0.000141239	0.000602134	5.95001	1.11063	-0.00266735	2.1634
Akr1a1	0.000153568	0.000626429	5.88777	6.65818	5.1686	2.80806
Akr1c13	0.000450688	0.00112627	-5.12	-1.71499	0.649877	-5.15104
Akr7a5	2.33148e-05	0.000305558	7.39394	2.6483	0.0876253	5.89983
Akt1	0.0055437	0.0058088	3.51943	5.92151	4.77506	2.21369
Akt3	0.0361305	0.0232936	-2.41888	1.96035	3.96515	-4.01335
Alad	4.36761e-05	0.000359155	6.86683	3.35847	0.779	5.9772
Alas2	0.0598428	0.0346359	2.12179	3.20494	1.33189	3.66305
Aldh18a1	0.0606367	0.0350087	2.11396	4.60209	3.38465	2.32534
Aldh1a1	0.0457461	0.0280025	2.28051	-1.15697	-2.8712	3.28122
Aldh1b1	0.0222335	0.0160039	2.70209	3.78601	0.96088	7.08679
Aldh2	0.000216465	0.000742735	5.63647	3.55401	2.14217	2.66076
Aldoa	0.00121456	0.00204065	4.46083	5.96488	4.35292	3.05666
Alg5	0.000946899	0.00176297	4.62254	3.40564	2.30279	2.14778
Alpk1	0.0664577	0.037562	-2.05937	-0.114287	1.1153	-2.34499
Als2cl	0.00693594	0.00676622	-3.38569	2.7048	6.14815	-10.8781
Alyref	0.000104256	0.000517804	6.17917	6.03753	4.6108	2.68837
Amd-ps3	0.00308978	0.00385333	3.87384	3.3193	1.89801	2.67825
Amd1	0.0153117	0.0120855	2.91957	4.68261	3.66283	2.02762
Amfr	0.0183624	0.0138633	2.81356	5.56994	4.51385	2.07929
Ampd2	0.00529762	0.00561013	3.54666	4.17294	3.09319	2.11368
Ampd3	0.00255964	0.00338221	3.98992	2.88867	-0.0442697	7.63665
Anapc13	0.00177698	0.00263847	4.21809	2.64083	1.34312	2.45839
Anapc15-ps	0.000373002	0.000999878	5.25072	0.5167	-0.934223	2.73383
Angpt1	0.0171745	0.0131788	2.85256	3.04806	1.88691	2.23635
Angptl2	0.0209636	0.0153067	2.73635	4.52647	3.47497	2.07269
Angptl4	0.000110417	0.000531576	6.13543	2.65629	0.531138	4.36248
Ank1	0.0232367	0.0165342	2.67638	-0.0827157	-3.51744	10.8132
Ankrd13d	0.0128319	0.0106131	-3.02289	1.06277	2.25544	-2.28574
Ankrd33b	0.010449	0.0091194	-3.14343	-1.10801	0.650519	-3.38352
Ankrd50	0.00240768	0.00323084	-4.02789	4.83324	6.00128	-2.24706
Ankrd55	0.00914368	0.00825139	-3.22203	-0.844231	1.84839	-6.46489
Ankrd6	0.0465754	0.028379	-2.26994	2.86299	4.12464	-2.39769
Ano10	3.50599e-05	0.000334867	7.04826	4.64135	2.74811	3.71471
Anp32b	2.70179e-05	0.00030971	7.26768	5.77161	4.26381	2.84376
Anp32b-ps1	0.00072256	0.00148909	4.80099	2.61226	1.24623	2.5776
Anp32e	0.000513256	0.00120814	5.03115	7.44722	6.3787	2.09728
Anxa1	0.0426182	0.0264588	2.32212	1.32914	-0.678368	4.02087
Anxa11	0.00475461	0.00519001	3.61171	5.31331	3.4785	3.56724
Anxa4	0.0013214	0.00216688	4.4066	1.94325	0.718683	2.33686
Anxa6	0.0710863	0.0395643	2.01911	5.86716	4.77425	2.13304
Ap1s1	0.00383778	0.00447179	3.74139	3.51242	2.32703	2.27425
Ap5s1	0.00484151	0.00526318	3.6008	1.54634	0.524072	2.03111
Apex1	4.238e-05	0.000358448	6.89151	5.47339	2.68293	6.91853
Aph1a	0.00607621	0.00621117	3.46456	3.99295	2.95135	2.0585
Aph1b	0.0123161	0.0102918	3.04693	0.680168	-0.497248	2.26171
Apip	0.0102348	0.00896757	3.15562	1.68268	0.530286	2.22282
Apmap	0.00288958	0.00367989	3.91503	4.01246	2.82624	2.27556
Apobec3	0.00956725	0.00852711	3.19533	5.79416	4.19147	3.03708
Apobr	0.068666	0.038514	-2.03984	-0.312694	0.819848	-2.19245
Apol11b	0.00421127	0.0047849	3.68503	1.13252	-3.51744	25.1061
Apoo	0.00215584	0.00299192	4.09673	1.06532	-0.0214075	2.12392
Aprt	0.00158944	0.00245544	4.28871	3.37354	1.55279	3.53266
Aqp11	0.00295282	0.00373054	-3.9017	4.9329	7.20419	-4.82753
Ar	0.0426001	0.0264558	-2.32237	-1.36142	0.555431	-3.77598
Arap2	0.0234529	0.0166575	-2.67098	5.05371	7.00655	-3.87136
Arf2	0.0014235	0.00227425	4.35894	3.91933	2.88919	2.04222
Arf4	0.00683034	0.00670435	3.39481	5.3334	4.05009	2.43397
Arhgap17	0.000471075	0.00115308	-5.08968	2.85515	3.96924	-2.16457
Arhgap23	0.00504278	0.00541238	3.57628	1.38523	0.258656	2.1834
Arhgap24	0.002068	0.00291172	-4.12275	-1.63237	2.61595	-19.0052
Arhgap25	0.0763066	0.0418819	-1.97657	3.31861	4.85006	-2.89076
Arhgap27os3	0.0755605	0.0415827	-1.98248	0.744318	1.96575	-2.33178
Arhgap29	0.0178999	0.0136142	-2.82843	-0.651791	1.79472	-5.45094
Arhgap32	0.0104612	0.00912341	-3.14275	-1.59933	1.29301	-7.42471
Arhgap4	0.000347542	0.000962543	-5.3	5.20958	6.97846	-3.40789
Arhgap45	0.00228034	0.00310826	-4.0617	7.22455	8.4023	-2.26223
Arhgef1	0.0150105	0.0119094	-2.93118	6.0268	7.14547	-2.17147
Arhgef10l	0.00808753	0.00753799	3.29456	4.31961	0.600049	13.1735
Arhgef11	0.0105299	0.00916111	-3.1389	2.33079	4.28619	-3.87824
Arhgef12	0.000785221	0.00156315	4.74578	5.02563	2.34037	6.43197
Arhgef3	0.00197391	0.00283039	4.15194	6.17195	4.3361	3.56981
Arhgef5	0.00293019	0.00371375	-3.90644	-0.825887	1.14725	-3.92622
Arid3b	8.13689e-06	0.000232594	-8.34299	2.4093	4.52372	-4.33014
Arid5b	0.00583743	0.00604326	-3.48852	1.26124	3.77603	-5.71515
Arl1	2.0941e-05	0.000291754	7.48689	5.11399	3.50521	3.04994
Arl11	0.0305782	0.0204886	2.51635	-0.815955	-2.82761	4.03244
Arl14ep	0.0332608	0.0218399	2.46725	5.34648	4.14634	2.29763
Arl2bp	0.00011317	0.000538516	6.11672	4.85453	3.20682	3.13337
Arl5c	0.0143701	0.0115348	-2.95666	2.79368	5.92069	-8.73623
Armcx1	0.00629282	0.00635412	-3.44365	-1.99446	2.03306	-16.3081
Armcx2	0.0155518	0.0122337	-2.91048	-0.410837	2.88282	-9.80598
Armcx3	0.00175772	0.00261971	-4.22497	-0.072306	3.20161	-9.67268
Arntl	0.0168306	0.0129728	-2.86436	3.65132	5.31211	-3.16189
Arpp21	0.00178803	0.0026466	-4.21418	7.44825	8.65578	-2.30943
Arrdc4	0.00926373	0.00833889	-3.21433	-0.310276	1.45272	-3.39402
Arsg	3.00074e-05	0.000319649	7.17873	1.2049	-0.294111	2.82648
Arvcf	0.0158155	0.0123945	2.90067	4.46668	3.16838	2.4594
Asah2	0.0645562	0.036722	-2.07668	-0.339674	1.08378	-2.68226
Asap2	0.00156261	0.00243008	4.29952	2.85941	0.675886	4.54261
Asb2	0.0708071	0.0394316	-2.02146	-1.61105	0.381251	-3.97871
Ascc1	7.16829e-05	0.000439334	6.46944	3.24226	1.88469	2.56253
Ash1l	4.22076e-05	0.000358448	-6.89486	6.1348	7.45554	-2.49794
Ash2l	0.000387696	0.00102833	5.22389	5.31949	4.28167	2.05313
Asns	0.00768993	0.00726799	3.32442	2.18014	-3.29072	44.3499
Asrgl1	6.93834e-05	0.00043446	6.49511	4.70518	3.39093	2.48673
Atad2	0.00257304	0.00339427	3.98668	7.60877	6.53819	2.10028
Atad3a	0.00126685	0.00209909	4.43369	4.16882	2.60359	2.95924
Atf1	0.000864821	0.00165601	4.68205	4.62705	3.45247	2.25727
Atf1-ps	4.81474e-05	0.000377409	6.7874	2.21866	0.513138	3.26147
Atf3	0.0048346	0.00526011	3.60166	-0.837429	-3.15464	4.98367
Atf4	0.0021081	0.00294556	4.11073	6.28878	4.94602	2.53636
Atf5	0.041335	0.0258113	2.34007	2.11338	0.447	3.17418
Atf6	7.49471e-07	0.000129474	10.8491	4.84876	3.12533	3.30219
Atf7ip	0.00035862	0.000973712	-5.2781	6.23862	7.52315	-2.43602
Atg10	0.000445248	0.00111829	5.12834	1.30597	0.0728155	2.3508
Atg4c	0.0234961	0.0166785	-2.66991	-1.63449	0.169708	-3.49235
Atg5	0.00098391	0.00180586	4.59748	4.34789	3.34286	2.00699
Atic	0.000132801	0.000579211	5.99608	6.48329	4.19604	4.88126
Atl1	0.0576866	0.0336378	-2.14357	0.193066	1.32814	-2.19629
Atl2	0.000759953	0.00153513	-4.76746	5.77347	7.21784	-2.72144
Atox1	0.00474321	0.00518184	3.61315	3.64813	2.36505	2.43358
Atp10a	0.000407313	0.00106121	-5.18971	3.75983	5.39123	-3.09813
Atp1a1	0.00105354	0.00187548	4.55293	7.3228	6.16198	2.23584
Atp23	0.00928963	0.00835255	3.21269	1.70581	0.604729	2.14516
Atp2a2	0.00464687	0.00510884	3.62553	6.20863	5.19967	2.01245
Atp5a1	0.000912769	0.00171396	4.64659	8.338	7.03753	2.46309
Atp5b	0.000162856	0.0006429	5.84432	8.86581	7.24703	3.07115
Atp5c1	0.000746337	0.00151996	4.77946	6.52137	5.19105	2.51459
Atp5c1-ps	0.002038	0.00288498	4.1319	0.781449	-0.61696	2.63611
Atp5d	0.000119338	0.000552903	6.07654	4.89071	3.36566	2.87797
Atp5e	0.000980902	0.00180481	4.59948	5.11767	3.50976	3.0481
Atp5f1	0.00113103	0.00196501	4.50687	6.82959	5.41535	2.6652
Atp5g1	8.00242e-05	0.000460329	6.38326	3.87893	2.06047	3.52705
Atp5g2	0.000417228	0.00107348	5.1731	1.20449	-0.36624	2.97056
Atp5g3	0.00092254	0.00172564	4.63961	6.10251	4.82605	2.42245
Atp5j	0.00265288	0.00345712	3.96777	4.94338	3.8649	2.11182
Atp5j2	0.00781026	0.00734566	3.31522	5.58	4.45786	2.17671
Atp5k	0.00267807	0.00348424	3.96193	4.60732	3.19363	2.66416
Atp5k-ps2	0.00885415	0.00806153	3.24102	0.888941	-0.487912	2.59701
Atp5mpl	0.00114276	0.00197861	4.5002	4.27466	2.92231	2.55328
Atp5o	0.0020345	0.0028819	4.13298	5.24032	4.05106	2.28035
Atp6v1f	0.00580339	0.00602058	3.49202	4.32351	3.26808	2.07834
Atp8a1	0.00167592	0.00254552	4.25511	6.89317	5.67798	2.3217
Atp8a2	0.0348179	0.0226273	2.44052	4.04347	0.540228	11.3392
Atp9a	0.0172013	0.0131918	2.85165	3.5618	1.66904	3.71345
Atpif1	0.00120237	0.00203235	4.46734	4.94074	3.47495	2.76215
Atraid	0.000947745	0.00176297	4.62196	3.05213	1.79314	2.39328
Atrnl1	0.0114327	0.00973126	-3.09058	1.73696	4.86541	-8.74495
Atxn10	6.37823e-05	0.000424123	6.56169	5.72737	4.47372	2.38444
Atxn7l1	1.5945e-06	0.000150959	-9.99661	3.88889	5.08157	-2.28576
Aunip	0.000109302	0.000528338	6.14314	1.59328	0.00574803	3.00535
Aurkb	0.00376431	0.00440167	3.75314	4.89434	3.68909	2.30577
Aven	0.000165612	0.000645812	5.83195	3.13157	1.37403	3.38121
Axdnd1	2.55471e-05	0.000307367	-7.31544	-0.271743	3.78385	-16.6286
B130006D01Rik	0.00178805	0.0026466	-4.21418	1.2116	2.66342	-2.73552
B2m	0.00237866	0.0032038	4.03543	8.07107	6.27973	3.46136
B3glct	0.000741131	0.00151324	4.78411	3.01006	1.62042	2.62013
B4galt5	0.00108332	0.00191221	4.53482	3.45848	1.62015	3.57594
B4gat1	0.00248769	0.00330693	4.00759	2.24614	1.2272	2.02643
B630019A10Rik	0.000445621	0.00111851	-5.12777	0.817167	3.77416	-7.76504
BC005561	0.019631	0.0145644	-2.77462	3.97036	5.12694	-2.22928
BC024063	0.012688	0.0105291	-3.0295	-2.17418	1.2986	-11.1023
BC028528	0.0686303	0.0385048	2.04015	-1.05756	-2.45625	2.63662
BC029722	0.0366171	0.0234854	2.41106	2.36723	1.30229	2.09207
BC048403	0.00310262	0.00386126	3.87129	0.868717	-0.190807	2.08424
BC055324	0.000236091	0.00077785	5.57394	3.78326	2.64891	2.1952
BC106179	0.021196	0.0154313	-2.72993	-0.494075	1.22439	-3.29087
BE692007	0.00147784	0.00233663	-4.33503	-0.271772	2.55042	-7.07234
Babam2	9.56429e-05	0.00049741	6.24524	3.56433	2.26217	2.46598
Bace1	0.00431351	0.00486904	3.67051	2.90596	1.02302	3.68826
Bag1	6.42432e-05	0.000424123	6.55597	4.99256	3.43157	2.95058
Bag2	0.000436501	0.0011061	5.14198	2.6052	0.226415	5.20097
Bahcc1	0.00378967	0.00442221	-3.74906	-2.1858	2.61551	-27.883
Bak1	0.0053948	0.00568728	3.53575	4.27146	3.01332	2.39186
Banf1	8.46048e-05	0.000464864	6.33996	5.15448	3.50277	3.14206
Bank1	0.00144361	0.00229347	-4.34998	-0.492248	2.50317	-7.97462
Banp	0.00740594	0.00708043	-3.34674	3.32982	4.50343	-2.25576
Basp1	0.0104836	0.00913686	-3.14149	-0.134268	1.28818	-2.6804
Bax	0.00600949	0.00616608	3.47115	3.76112	2.63748	2.17895
Baz2a	7.76383e-05	0.00045415	-6.40688	5.78015	6.8655	-2.12189
Bcap29	9.82975e-05	0.000506574	6.22421	4.10154	2.33876	3.39351
Bcat1	0.00172928	0.00259577	4.23528	3.45528	0.856101	6.05941
Bcat2	0.000140401	0.000599207	-5.95445	3.25502	4.38869	-2.19415
Bckdha	0.000981731	0.00180481	4.59893	4.09856	2.7484	2.5494
Bckdk	0.00608627	0.00621825	3.46357	3.9889	2.77853	2.31396
Bcl11a	0.00239544	0.00322047	-4.03106	-0.618343	2.15598	-6.84155
Bcl2l1	0.00205106	0.00289412	-4.1279	3.76117	5.86711	-4.30478
Bcl2l14	0.0396126	0.0249911	2.36502	1.83225	-0.871889	6.51668
Bcl6	0.00741881	0.00708718	-3.34571	2.63665	5.69808	-8.34802
Bcl7c	0.000674483	0.00142778	4.84691	4.06699	2.55751	2.84707
Bcl9	0.000593171	0.00131669	-4.93314	2.12912	3.51421	-2.6119
Bcorl1	0.0691452	0.0387008	-2.03568	1.95404	2.97642	-2.03127
Bend3	0.00374983	0.00438732	3.75549	3.55363	2.28021	2.41734
Bhlhe41	0.023842	0.0168603	-2.6614	-1.92771	-0.801105	-2.18345
Bicdl1	0.059025	0.0342724	-2.12996	2.59607	4.36742	-3.41373
Bicra	0.0045852	0.00506657	-3.63359	2.61531	3.77922	-2.24063
Bid	0.000216036	0.000742735	5.6379	4.89508	3.05099	3.59028
Bin1	0.0947324	0.0495594	-1.84556	1.91154	3.09374	-2.26923
Bivm	1.50826e-05	0.000266974	7.77627	4.46232	2.06959	5.2515
Blmh	0.00131216	0.00215886	4.41111	5.74875	4.40944	2.53032
Bloc1s1	0.00174352	0.00260503	4.2301	3.21263	2.09958	2.16302
Bloc1s2-ps	0.000446917	0.00112105	5.12577	1.94682	0.397848	2.92609
Bloc1s4	0.00603183	0.0061833	3.46894	1.86768	0.771342	2.13811
Blvra	0.00644474	0.00645234	3.42942	3.00678	1.77813	2.34349
Bmi1	0.000402909	0.0010553	5.19723	5.4222	3.90972	2.85302
Bola1	0.00075712	0.00153331	4.76994	1.93422	-0.465155	5.27575
Bola2	0.00144822	0.00229711	4.34795	3.36874	2.07007	2.46003
Bola3	0.00124218	0.00206856	4.44635	2.78014	1.30273	2.78447
Bop1	0.000475109	0.00116038	5.08384	5.02294	3.48155	2.91076
Borcs5	0.00952637	0.00850403	3.19785	2.11753	1.04773	2.09914
Borcs7	0.000915874	0.00171725	4.64437	1.76312	0.65401	2.15713
Bpnt1	0.00202721	0.00287362	4.13523	3.01573	1.21755	3.47781
Braf	0.0283858	0.0193226	-2.55974	3.99638	5.11496	-2.17134
Brca2	0.000444527	0.00111829	5.12946	5.48472	4.29362	2.28327
Bri3	0.00205573	0.00289855	4.12647	1.64127	0.447341	2.28774
Brix1	0.00027375	0.000847119	5.4682	4.49745	3.23168	2.40456
Brms1	0.00120961	0.0020391	4.46347	3.19169	2.09348	2.1409
Brwd3	0.000516915	0.00121173	-5.02632	4.72346	5.84705	-2.17888
Bsg	0.00202232	0.00286772	4.13674	5.60914	4.42126	2.27818
Bsn	0.00552151	0.00579625	3.52183	2.06549	-0.241677	4.94909
Btbd19	0.0172237	0.0132013	2.85089	2.00108	0.938073	2.08928
Btbd2	0.000594114	0.00131804	4.93207	3.60541	1.85433	3.36609
Btf3	3.75564e-05	0.000346228	6.99112	5.99464	4.33442	3.16065
Btla	0.0553271	0.0325823	-2.16832	1.93457	3.82287	-3.702
Bub1b	0.0268314	0.0184702	2.59257	6.57283	5.46979	2.14807
Bzw1	0.00114625	0.00198278	4.49822	7.84189	6.61902	2.3341
Bzw2	7.77958e-05	0.00045415	6.40529	7.06493	4.63146	5.40193
C030006K11Rik	0.000320955	0.000917161	5.35577	2.29944	0.663176	3.10859
C030017G13Rik	0.00657091	0.00653691	-3.41787	1.04018	2.46434	-2.68359
C130051F05Rik	0.000790856	0.00156881	-4.74105	0.858455	2.24518	-2.61484
C130083A15Rik	0.000724564	0.00149168	-4.79914	0.208759	2.12819	-3.78274
C1qbp	2.8582e-05	0.000312297	7.21988	4.79264	2.60043	4.57004
C1qtnf6	0.00663693	0.00658117	3.41191	-0.368461	-3.47496	8.6129
C230053D17Rik	0.00589485	0.00608369	-3.48267	-0.487211	1.75952	-4.74605
C230085N15Rik	1.3473e-05	0.000262415	-7.87767	4.32399	7.95394	-12.3801
C430019N01Rik	0.000331787	0.000936959	-5.33247	-1.02863	0.689748	-3.29066
C730045M19Rik	0.00804658	0.00751157	-3.29756	-0.245136	1.6667	-3.76288
C9orf72	0.000125727	0.000565107	-6.0372	0.890804	2.32592	-2.70404
CT010445.1	0.00521103	0.00554059	-3.55656	0.512556	2.02693	-2.85675
CT033749.1	0.00120514	0.00203416	4.46586	2.32967	1.00158	2.51072
CT485613.4	0.000130306	0.000574637	6.01031	4.75676	3.19426	2.95365
Cab39l	0.000491567	0.00117847	5.06058	4.08456	2.98392	2.14451
Cacna1d	0.0136604	0.0111247	2.98627	3.19404	0.7727	5.35668
Cacnb1	6.41534e-05	0.000424123	-6.55708	-1.2992	2.19992	-11.3068
Cacybp	0.00586195	0.00606073	3.48601	5.62952	4.48277	2.21414
Cad	2.67479e-05	0.00030971	7.27623	5.91623	3.70384	4.63443
Calcrl	0.000219785	0.000747994	-5.62548	1.10383	4.74483	-12.4753
Calm3	0.00312097	0.00387491	3.86767	6.75872	5.51789	2.36335
Calr	0.00147427	0.00233284	4.33657	6.91787	5.65018	2.40776
Calr-ps	0.00189638	0.00275573	4.17712	0.624596	-0.763189	2.61677
Camk2g	0.00700055	0.00680918	3.38017	5.67504	4.22744	2.72755
Canx	0.00200092	0.0028547	4.14341	7.80918	6.63799	2.25197
Capns1	0.00328106	0.00400514	3.83701	5.00626	3.85092	2.22736
Capzb	0.00611843	0.00624148	3.46042	5.25621	4.22479	2.04404
Car12	0.00356889	0.00423549	3.78562	2.17855	0.032493	4.42615
Card11	0.00339391	0.00410506	-3.81632	2.77571	4.64323	-3.64906
Card6	0.0730892	0.04047	-2.00245	1.43986	2.66797	-2.34261
Carhsp1	0.00610637	0.00623398	3.4616	4.66251	3.17672	2.8007
Carm1	4.20052e-05	0.000358448	6.8988	3.6562	2.20329	2.73759
Carmil2	0.012143	0.0101876	-3.05522	4.42353	6.09242	-3.17972
Casp3	0.0060609	0.00620157	3.46606	5.72483	4.11411	3.05406
Castor2	0.012963	0.0106926	-3.01694	0.740619	2.68721	-3.85463
Cbl	0.000494992	0.00118195	-5.05584	7.16696	8.55599	-2.61903
Cbr4	0.000413057	0.00106919	5.18003	2.90922	1.84515	2.09082
Cbx3-ps6	0.00316278	0.0039177	3.85951	5.818	4.72803	2.1287
Cby1	0.0140036	0.0113045	2.97176	3.17109	2.04059	2.18934
Ccdc102a	0.0850337	0.0455715	1.91122	0.562698	-0.729034	2.44822
Ccdc115	0.005732	0.00596085	3.49943	3.41679	2.25307	2.24034
Ccdc116	0.0386005	0.0244497	2.38018	0.0142092	-1.16816	2.26949
Ccdc124	0.00262458	0.00343614	3.97441	2.99683	1.63286	2.57393
Ccdc125	0.021653	0.0156768	2.7175	2.91301	1.64657	2.40566
Ccdc134	0.0455656	0.0279136	2.28283	5.07229	3.95901	2.16338
Ccdc162	0.0203422	0.0149429	2.75388	2.64318	1.47044	2.2544
Ccdc18	0.00840663	0.00776257	3.27166	5.65685	3.83753	3.52915
Ccdc186	0.00798947	0.00747641	-3.30178	3.45984	4.47864	-2.02623
Ccdc32	0.0125122	0.0104137	3.03767	2.74396	1.52878	2.32169
Ccdc58	0.00195232	0.00280957	4.15885	2.90789	1.49893	2.65544
Ccdc86	0.00113779	0.00197243	4.50302	3.00589	1.53433	2.77324
Ccdc88a	1.08234e-05	0.000252971	-8.07724	2.2199	5.065	-7.18554
Ccl25	0.000134977	0.000584215	-5.98391	2.9462	3.99513	-2.069
Ccl6	0.00474734	0.00518493	3.61263	2.77125	-0.8849	12.607
Ccl9	0.00065658	0.00140637	4.86491	1.78457	-2.29213	16.8737
Ccnb1	0.0198915	0.014707	2.76694	5.3526	4.27149	2.11566
Ccnb1-ps	0.0145501	0.011651	2.94938	4.07657	2.81789	2.39277
Ccnb2	0.0382789	0.0242808	2.38508	4.95713	3.8982	2.08338
Ccnd1	0.00250061	0.00332188	4.00438	3.39965	0.372839	8.15003
Ccnd3	0.00933874	0.00838173	-3.20958	6.66646	8.14834	-2.79311
Ccnl1	0.00154864	0.00241494	-4.30523	6.08929	7.0923	-2.00418
Ccnq	0.00190355	0.00276239	4.17474	3.33928	2.16132	2.26257
Ccnyl1	0.000947338	0.00176297	4.62224	2.31026	1.07976	2.34647
Ccr7	0.0328939	0.021646	-2.47373	1.51006	3.80128	-4.89468
Ccrl2	0.0647495	0.0368003	2.0749	-0.769832	-2.776	4.01713
Cct2	7.72193e-05	0.00045415	6.41111	7.41913	5.98505	2.7021
Cct3	0.00112678	0.00196018	4.50931	6.83467	5.60438	2.34614
Cct3-ps1	0.000186507	0.000687091	5.74473	1.36793	-0.366321	3.32708
Cct4	0.000823766	0.00161316	4.7141	6.84196	5.61432	2.34183
Cct5	1.41189e-05	0.000266964	7.83548	7.89229	6.06158	3.55712
Cct6a	5.95124e-05	0.000409814	6.61683	7.05392	5.3835	3.18306
Cct7	0.00160076	0.0024643	4.2842	6.8936	5.52603	2.58034
Cct8	0.000188642	0.000689676	5.73642	7.73948	5.69271	4.13182
Cd160	0.0146094	0.0116844	2.947	2.64759	0.128183	5.73347
Cd180	0.0165457	0.0128051	-2.87432	-0.75938	0.745868	-2.83873
Cd19	0.00301326	0.00378086	-3.88924	-1.12332	1.96378	-8.49789
Cd200	0.00115249	0.00198566	-4.49471	-0.261713	2.22545	-5.60673
Cd200r1	0.0132972	0.0108824	-3.00204	-0.306424	1.25444	-2.95031
Cd22	0.0396192	0.0249913	-2.36492	-0.0382693	1.72067	-3.38449
Cd226	0.000963085	0.00178233	-4.61146	0.028334	3.28605	-9.56464
Cd24a	0.00342346	0.00412699	3.81102	7.35164	6.14282	2.31148
Cd274	0.0223568	0.0160722	-2.69887	2.20563	3.20784	-2.00306
Cd28	0.0781469	0.0426406	-1.96223	6.29685	7.59002	-2.45066
Cd2bp2	0.00262179	0.00343614	3.97507	5.90536	4.75793	2.21518
Cd320	2.47295e-05	0.000307367	7.34329	1.79803	0.223781	2.97781
Cd4	0.0176956	0.013491	-2.83513	4.17897	7.92685	-13.4346
Cd40	0.016324	0.0126805	-2.8822	-2.0322	0.233423	-4.80862
Cd46	1.58022e-06	0.000150959	-10.0064	1.55997	3.23238	-3.18747
Cd5	0.0179296	0.0136233	-2.82747	3.97731	5.95923	-3.9502
Cd52	0.0106971	0.00925591	-3.12964	2.3168	4.59674	-4.85656
Cd6	0.0389288	0.0246262	-2.37522	4.585	6.07093	-2.80098
Cd68	0.017501	0.0133674	2.84158	2.38258	0.988497	2.62822
Cd69	0.0040866	0.00467826	-3.70324	2.5905	5.56038	-7.83467
Cd79b	0.035493	0.0229758	-2.42929	0.082576	1.97103	-3.70238
Cd80	0.0175516	0.0133957	-2.8399	-1.4899	0.151405	-3.11948
Cd81	0.000995753	0.00181323	4.58967	5.70176	4.42245	2.42722
Cd82	0.0230108	0.0164235	2.68207	5.67338	3.10301	5.93958
Cd83	0.049515	0.0298271	-2.23389	0.397743	1.78599	-2.6176
Cd84	0.00159861	0.0024629	-4.28505	5.16767	6.22444	-2.08027
Cdc14b	0.00329905	0.00402222	3.83366	3.8431	2.48081	2.57092
Cdc20	0.00928365	0.00834926	3.21307	4.96576	3.68711	2.42612
Cdc25a	0.0115825	0.00983147	3.08294	5.18882	4.14074	2.06777
Cdc25b	0.0069129	0.00675702	3.38767	5.31992	3.97775	2.53531
Cdc34	0.00740081	0.00707993	3.34715	4.20033	2.92033	2.42839
Cdc34b	0.00672743	0.00663943	3.40385	0.542675	-0.876297	2.67395
Cdc42ep4	3.38794e-07	8.41338e-05	11.8123	4.92792	2.04563	7.37316
Cdc45	0.00142175	0.00227418	4.35973	4.68542	3.08972	3.02242
Cdc6	0.000926332	0.00173043	4.63692	5.05967	3.61979	2.71299
Cdca2	0.0088374	0.00804996	3.24214	5.20203	4.08757	2.16514
Cdca5	0.00076505	0.00153992	4.76302	4.28733	2.85834	2.6926
Cdca8	0.00221202	0.00304834	4.08066	4.63837	3.47644	2.23755
Cdh24	0.0281505	0.0192085	-2.56459	2.20654	4.09026	-3.69026
Cdk1	0.0110426	0.00948056	3.11096	5.66647	4.53745	2.18711
Cdk17	1.49305e-05	0.000266964	-7.78534	5.11256	6.65644	-2.91577
Cdk20	1.16655e-06	0.000144627	-10.3424	1.34144	3.63031	-4.88672
Cdk2ap1	0.000807065	0.00158986	4.72763	4.64892	2.9727	3.1959
Cdk4	6.40075e-05	0.000424123	6.55889	6.80898	4.95412	3.61716
Cdk5rap2	0.0178813	0.0136082	2.82904	6.97738	5.12973	3.59913
Cdkl5	0.00665733	0.00659313	-3.41009	-0.265013	2.30729	-5.94756
Cdkn2aipnl	0.0101625	0.00892063	3.15979	5.91797	4.9172	2.00106
Cdr2	0.0552702	0.0325536	2.16893	2.7766	1.55053	2.33929
Cds1	0.00734794	0.00704362	-3.3514	-2.96396	-0.199974	-6.79273
Cdt1	8.32743e-05	0.000461473	6.35227	4.66436	2.80241	3.63497
Cdv3	0.00159775	0.00246253	4.2854	7.7354	6.34435	2.62268
Cdv3-ps	0.000304672	0.000897378	5.39243	4.13954	1.90065	4.72033
Cebpzos	0.000707149	0.00146876	4.81534	1.37812	-0.520624	3.72888
Celsr1	0.000993673	0.00181294	4.59103	6.12227	4.1629	3.88891
Celsr2	0.0589878	0.0342606	-2.13034	1.06088	3.20091	-4.40772
Cenpb	2.66786e-05	0.00030971	7.27844	5.73594	3.93156	3.4928
Cenph	4.40526e-05	0.000359155	6.85981	2.79921	1.36873	2.69536
Cenpm	6.67533e-05	0.000431976	6.52562	2.51876	0.567034	3.86836
Cenpn	0.00349131	0.00417207	3.79904	3.26447	2.24986	2.02035
Cenps	0.000158169	0.000634806	5.86591	2.47455	0.967285	2.8427
Cenpu	5.85521e-05	0.00040751	6.62982	2.25051	1.12903	2.1757
Cenpv	4.75155e-07	9.70057e-05	11.3932	3.72224	-0.855774	23.8846
Cenpw	0.000531724	0.00123079	5.00712	3.20091	1.50842	3.23214
Cenpx	0.000223093	0.000753219	5.61469	2.90516	1.10725	3.47715
Cep170b	0.00117335	0.00200867	-4.48311	-1.3068	0.583428	-3.70693
Cep83os	0.000464651	0.00114038	5.09908	3.21864	1.69623	2.8727
Cep85l	0.00373929	0.00438272	-3.7572	-0.611042	2.41592	-8.15092
Cep97	9.98233e-05	0.000507266	-6.21241	6.02684	7.06865	-2.05881
Cercam	0.000117897	0.000549817	6.08572	1.12095	-0.898494	4.05429
Cetn2	0.00131737	0.00216435	4.40856	4.14747	2.94129	2.30727
Cetn3	0.000853229	0.00164433	4.69093	4.99814	3.85191	2.21335
Cfap298	0.0020497	0.00289412	4.12831	2.81936	1.28992	2.88674
Cfl1	0.00354289	0.00421762	3.79009	8.51633	7.357	2.23354
Cflar	0.000673422	0.00142706	-4.84796	5.45225	6.58468	-2.19227
Cgrrf1	0.0518407	0.030928	2.2068	1.38568	0.275878	2.15816
Chaf1a	0.000640276	0.00138112	4.88176	5.27181	3.93372	2.52817
Chaf1b	0.00133175	0.00218116	4.4016	4.47323	2.71717	3.37776
Chchd1	0.00318888	0.00393796	3.85447	4.60774	3.17911	2.69191
Chchd2	0.00143067	0.00228203	4.35573	6.31337	5.04009	2.41711
Chchd3	0.000179494	0.000674164	5.77278	6.84624	4.87483	3.92152
Chchd4	0.0106961	0.00925591	3.12969	3.18957	1.87206	2.49237
Chd3	1.70748e-06	0.000150959	-9.92217	1.71163	6.1446	-21.6001
Chd7	0.0945054	0.0494536	1.84702	4.88897	3.66311	2.33895
Chek1	0.000268417	0.000838452	5.48219	4.544	3.13151	2.66198
Chic1	0.00338527	0.00409711	-3.81788	-1.98296	0.533511	-5.7218
Chil1	0.0801195	0.043519	1.9472	-1.71241	-4.07872	5.15622
Chil3	0.0332068	0.0218158	2.4682	1.74119	-1.82047	11.8077
Chmp4b	0.00272002	0.00352267	3.95233	5.0967	3.7052	2.62352
Chmp6	0.0173033	0.0132462	2.8482	3.37548	2.36384	2.01621
Chn2	0.0304826	0.0204383	-2.51817	-1.25414	1.11604	-5.17007
Chpf	0.0476853	0.028911	2.25607	2.22763	0.800821	2.68852
Chrac1	0.000137521	0.000591359	5.96994	4.16186	2.50098	3.16208
Chrnb1	0.000507737	0.00119799	-5.03851	-2.91545	0.581066	-11.2864
Chst10	0.0234982	0.0166785	-2.66986	3.43518	4.49339	-2.08234
Chst3	0.00438285	0.00491939	-3.66086	-2.28933	0.534745	-7.08159
Chtf18	7.75025e-06	0.000229745	8.389	3.61384	2.20718	2.65123
Ciao2a	0.00049809	0.0011865	5.05158	5.00903	3.44168	2.96359
Ciita	0.000921979	0.00172554	-4.64001	1.11589	3.34287	-4.68153
Cirbp	9.25152e-05	0.000489668	6.27083	5.39004	3.45261	3.83021
Cisd1	0.00862978	0.00790251	3.25618	3.04732	1.71689	2.51478
Cisd3	0.0137174	0.0111522	2.98384	0.200934	-1.72425	3.79787
Cish	0.0212815	0.0154756	-2.72758	-0.731727	1.37096	-4.29508
Cks1b	5.33377e-05	0.000395873	6.70463	4.92906	2.73617	4.57221
Cks2	0.00583929	0.00604361	3.48833	3.55159	2.52476	2.03754
Clcf1	0.0317281	0.0210567	-2.4948	-0.619246	1.52344	-4.41584
Clcn6	0.0001086	0.000526866	-6.14805	3.0924	4.32483	-2.34964
Clec2d	0.000817381	0.00160461	-4.71924	2.66538	5.592	-7.60326
Clic4	0.0111698	0.0095691	3.10423	5.95479	4.50087	2.73952
Clk3	5.70104e-06	0.000216493	-8.68378	5.60388	7.2684	-3.17008
Cln5	0.00559968	0.00585356	3.51341	3.99604	2.6474	2.54672
Cln6	0.000462927	0.00113822	5.10163	3.11	1.74061	2.58362
Clns1a	0.00176549	0.00262926	4.22219	5.29779	4.10844	2.28051
Clpp	0.00144611	0.00229468	4.34888	2.81418	1.46634	2.54531
Clstn1	0.034618	0.0225268	2.44389	3.38355	1.42391	3.88965
Clta	0.000309309	0.000902798	5.38178	5.32522	4.06376	2.39738
Cluh	0.000220015	0.000747994	5.62472	4.85749	3.52277	2.52227
Cmah	0.018075	0.0136978	-2.82276	4.63755	5.7676	-2.18867
Cmc1	6.38487e-05	0.000424123	6.56086	2.43241	0.803716	3.09232
Cmss1	0.000523665	0.00122035	5.0175	2.82152	0.598964	4.66719
Cmtm4	0.00120291	0.00203235	-4.46705	1.26234	3.32284	-4.17129
Cmya5	0.0111928	0.00957844	-3.10303	1.2732	2.63248	-2.56558
Cnbp	0.000422347	0.00108196	5.16469	8.13524	6.64296	2.81333
Cndp2	0.00281268	0.00360634	3.93165	3.72881	2.27669	2.7361
Cnih1	0.000576113	0.00129693	4.95283	4.63599	3.01794	3.0696
Cnot9	0.000485747	0.00116997	5.06871	5.51634	4.13921	2.5975
Cnpy2	0.00103008	0.00185197	4.56758	4.34433	2.76864	2.98076
Cntln	0.0321959	0.0212853	-2.48626	-0.0710674	2.22781	-4.92076
Coa5	0.00633439	0.00637827	3.43972	5.61261	4.59499	2.02457
Coa6	0.00917129	0.00827255	3.22025	2.53245	1.39877	2.19418
Cog7	0.000289129	0.000873903	5.42943	2.5401	1.48106	2.08355
Col1a2	0.0290177	0.0196623	2.5469	4.06489	-0.131778	18.3367
Commd1	0.00534302	0.00564467	3.54154	3.96316	2.83354	2.18801
Commd10	2.68929e-05	0.00030971	7.27163	3.12146	1.85395	2.40746
Commd5	0.00741538	0.00708718	3.34598	2.88551	1.54588	2.53086
Commd9	0.000499497	0.00118914	5.04966	2.44263	1.23653	2.30713
Comt	0.00420741	0.00478325	3.68558	3.52011	1.9593	2.95018
Comtd1	0.00344195	0.00413506	3.80773	1.69238	-0.420269	4.32485
Cops2	0.00212069	0.00295657	4.107	5.77679	4.73552	2.05804
Cops7a	0.000237575	0.000779392	5.56944	3.59253	2.40382	2.2795
Cops9	0.000881427	0.0016781	4.66954	4.25899	2.85976	2.6376
Copz1	0.00174378	0.00260503	4.23	5.37655	4.30506	2.10161
Coq2	0.00142745	0.00227871	4.35718	3.76654	2.58482	2.26848
Coq3	0.0131168	0.0107775	3.01004	2.41972	1.13079	2.44347
Coq4	0.00981485	0.0086932	3.18028	1.31299	0.311121	2.00259
Coq7	0.0011125	0.00194729	4.51757	2.50335	1.18569	2.49263
Coq9	0.00180462	0.00266457	4.20835	3.51358	2.5077	2.00817
Coro1c	0.000552368	0.00126135	4.9813	5.53019	4.25636	2.41802
Coro2a	0.000750096	0.0015249	4.77612	5.53244	1.76973	13.5734
Cotl1	0.0284324	0.0193416	2.55878	5.48116	4.00388	2.78424
Cox14	0.000190833	0.000693241	5.72799	3.6849	2.03838	3.13077
Cox4i1	0.000426795	0.00109022	5.15747	6.74292	5.18199	2.95044
Cox5a	0.000706098	0.00146811	4.81634	4.75792	3.45585	2.46583
Cox5b	0.000564309	0.00127472	4.96682	3.92802	2.52721	2.6405
Cox6a1	0.00198979	0.00284588	4.14691	5.23628	3.73757	2.8259
Cox6b1	0.00100405	0.00182416	4.58426	5.62663	4.26484	2.57005
Cox6c	0.000220068	0.000747994	5.62455	6.59844	4.7505	3.59985
Cox6c2	0.000686791	0.00143964	4.83483	3.4448	1.36571	4.22539
Cox7a2	0.0095291	0.00850456	3.19768	5.45129	4.23115	2.32969
Cox7a2l	0.000883867	0.00168194	4.66772	6.60091	5.33795	2.39988
Cox7b	0.000556481	0.0012662	4.97627	6.02444	4.31809	3.26334
Cox7c	0.00177116	0.00263573	4.22017	3.85205	2.60144	2.37941
Cox8a	0.00103184	0.00185378	4.56647	5.3539	3.6999	3.14703
Cpsf1	5.92382e-05	0.000408634	6.62052	5.8175	4.80175	2.02196
Cpt1a	0.000514039	0.00120855	5.03011	6.15489	4.52286	3.09949
Cr2	0.010632	0.00922225	-3.13323	-1.34341	1.75578	-8.56941
Crebl2	0.00138109	0.00223693	-4.37829	2.04919	3.16236	-2.1632
Creg1	0.0130271	0.0107344	3.01405	3.3062	2.04247	2.40114
Creld2	0.0108653	0.00936713	3.12047	3.15545	2.04894	2.15324
Crim1	0.00595941	0.00613279	-3.47616	0.140944	2.23908	-4.28156
Crip1	0.00129042	0.00212749	4.42184	6.57543	4.02595	5.85424
Crip2	0.0198436	0.014677	2.76835	0.0714799	-1.47222	2.91541
Crls1	0.000781261	0.00156017	4.74913	3.64299	2.34373	2.46102
Crtam	0.0297845	0.0200821	-2.53169	-2.5952	-1.05828	-2.90175
Crtap	0.000159144	0.000636791	5.86136	1.85257	0.0856112	3.40335
Crybg3	0.0858822	0.0459148	-1.9052	0.181467	1.29238	-2.15982
Cryl1	7.99436e-05	0.000460329	6.38404	2.89155	0.728737	4.47786
Cryz	0.00312035	0.00387491	3.8678	1.44988	-0.565337	4.04241
Csnk2b	0.00247329	0.00329344	4.01119	4.71011	3.49615	2.31974
Csrp1	0.0104613	0.00912341	3.14274	6.15379	5.1187	2.04925
Cstb	0.00355411	0.00422552	3.78816	3.00441	1.89994	2.15021
Ctnnbl1	0.00107253	0.0018982	4.54132	4.92969	3.83204	2.14007
Ctps	0.0239561	0.0169141	2.65862	4.37258	3.10125	2.41383
Ctsb	0.000636707	0.00137755	4.88551	6.9361	5.2781	3.15578
Ctse	0.0625419	0.0358431	2.09556	5.04974	2.84152	4.62105
Ctsl	1.18999e-05	0.000257752	-7.99036	4.39149	7.60006	-9.24433
Ctsz	0.000819397	0.00160619	4.71761	4.81368	3.42085	2.62594
Ctu1	0.000479199	0.00116647	5.07798	2.52951	1.18372	2.54169
Cuedc2	0.000479792	0.00116669	5.07714	3.53703	2.36628	2.25129
Cul9	0.000629849	0.00136873	-4.89278	-0.439498	1.85604	-4.90938
Cuta	0.00411725	0.00470362	3.69871	2.76329	1.6436	2.173
Cwc15	0.000321545	0.000917161	5.35448	5.14005	3.95736	2.26999
Cxadr	0.0351992	0.0228154	2.43415	3.59788	1.54206	4.1578
Cxcr3	0.00179545	0.00265398	-4.21157	-2.41616	0.138244	-5.87423
Cxcr5	0.0624507	0.0358166	-2.09643	-1.46634	-0.00984595	-2.7444
Cxcr6	0.0134729	0.0110058	-2.99436	-1.14539	2.10658	-9.52664
Cxxc5	0.00672736	0.00663943	3.40385	4.51087	3.15204	2.56477
Cyb561a3	0.00262241	0.00343614	-3.97492	1.30167	2.45073	-2.2177
Cyba	0.0305268	0.0204576	2.51733	4.63197	3.60439	2.03859
Cyc1	0.000866031	0.00165753	4.68113	5.05886	3.60758	2.73451
Cycs	0.00501369	0.00539427	3.57976	4.50856	3.35706	2.22146
Cyp20a1	0.00105553	0.00187667	4.5517	1.90062	0.59825	2.46634
Cyp27a1	0.0300498	0.0202198	-2.52652	-1.31364	0.0538202	-2.58017
Cyp51	8.06288e-05	0.000461473	6.37739	4.05637	2.58073	2.78107
Cysltr2	0.00678353	0.00668152	-3.39891	-0.837005	2.48781	-10.0201
Cyth4	0.000307622	0.000901033	5.38563	4.6493	3.41737	2.34882
D130019J16Rik	4.89013e-06	0.000209034	-8.83408	4.6647	7.53932	-7.33407
D130040H23Rik	0.00538534	0.00568485	-3.53681	1.25867	2.56801	-2.47827
D130062J10Rik	0.00273381	0.00353707	-3.9492	-1.08576	0.46718	-2.93415
D230049E03Rik	0.00440606	0.00493425	-3.65767	0.903334	2.31253	-2.6559
D330041H03Rik	5.09467e-05	0.00038557	-6.74163	2.72318	3.87027	-2.21467
D530018E20Rik	0.00143606	0.00228888	-4.35333	0.698972	1.97137	-2.41563
D5Ertd605e	0.000279245	0.000858534	5.45408	1.76056	-0.408947	4.49868
D730003I15Rik	0.026087	0.0180894	-2.60897	-0.0780382	1.04703	-2.18112
D930048N14Rik	0.00287638	0.00367132	-3.91785	-1.14743	1.19395	-5.06785
D9Wsu149	0.00111108	0.00194565	4.51841	1.25278	0.0743584	2.2633
Dancr	0.0183901	0.0138774	2.81268	2.29397	0.793809	2.82875
Dap	0.0868967	0.0463456	1.89808	4.00408	2.0161	3.96682
Dars	1.4696e-05	0.000266964	7.79952	6.70851	4.94319	3.39949
Dazap2	0.000153016	0.000625497	5.89044	6.64968	5.00991	3.11616
Dbi	0.00241544	0.00323579	4.02589	3.96785	2.64302	2.50503
Dbn1	0.00128889	0.00212674	4.4226	0.197986	-3.30088	11.3048
Dclk2	0.0449269	0.0276031	2.29114	6.45166	5.03092	2.67723
Dclre1c	4.63412e-06	0.000209034	-8.88724	3.69412	5.33519	-3.11898
Dctn3	0.00101525	0.00183611	4.57703	3.08989	1.89103	2.29558
Dctpp1	0.000251544	0.000807977	5.5285	4.2323	2.09472	4.40023
Ddb1	0.000165386	0.000645812	5.83295	7.74896	6.44776	2.46433
Ddhd2	0.00115164	0.00198566	-4.49519	2.51453	3.94887	-2.70259
Ddit4	2.43315e-05	0.000305941	7.35722	6.67138	3.96916	6.50807
Ddost	0.000411385	0.00106626	5.18284	5.21339	3.5678	3.12875
Ddrgk1	5.39244e-05	0.000397309	6.69583	3.60575	2.36051	2.37059
Ddt	0.0005302	0.00123074	5.00907	2.30506	0.837198	2.76612
Ddx1	0.011672	0.00987997	3.07843	5.3986	4.26789	2.18967
Ddx18	6.84387e-05	0.00043417	6.50592	4.17897	2.83795	2.5333
Ddx19a	0.000905793	0.00170489	4.65163	5.44494	3.73905	3.26231
Ddx19b	0.00756256	0.00718521	3.33432	5.24211	4.18742	2.07727
Ddx21	0.000427489	0.00109022	5.15635	6.93472	5.24806	3.21909
Ddx27	0.000113588	0.000539858	6.11393	5.10211	3.81624	2.43829
Ddx49	0.00077412	0.00155032	4.75521	4.09274	2.99955	2.13345
Ddx56	0.0127691	0.0105766	3.02577	4.13302	3.04909	2.1198
Ddx59	0.00638985	0.0064146	3.43452	2.61023	1.52281	2.12494
Ddx60	0.0351457	0.0227881	-2.43504	1.10895	3.3517	-4.73299
Def8	0.000123262	0.000559727	6.05212	3.74813	1.86838	3.68011
Dennd1c	0.00112137	0.00195506	-4.51243	3.30477	5.2102	-3.74622
Dennd2d	0.0011549	0.00198822	4.49336	6.8941	4.79427	4.28658
Dennd3	0.0925164	0.048637	1.85999	3.50499	1.8538	3.14093
Dennd5a	0.0734134	0.0406035	-1.99979	2.5651	3.72821	-2.23939
Denr	0.000753816	0.00152971	4.77284	4.27253	3.20279	2.09905
Deptor	0.00708805	0.0068674	3.37279	3.41752	0.988988	5.38346
Desi1	0.000198722	0.000710087	5.69848	7.44509	5.39443	4.14294
Dgka	0.00638642	0.00641278	-3.43484	5.6059	6.95164	-2.54161
Dgke	1.52409e-05	0.000266974	-7.76694	4.44798	6.98643	-5.80966
Dhdh	0.00492598	0.00533118	3.59038	0.200716	-1.22608	2.68848
Dhfr	1.30928e-05	0.00026204	7.90354	5.15687	3.12494	4.08952
Dhrs11	0.0501799	0.0301307	2.22602	0.185322	-1.42365	3.05034
Dhrs13	0.0317689	0.0210697	2.49405	2.08278	1.0479	2.04895
Dhrs3	5.25988e-06	0.000210164	-8.76242	2.00756	5.76028	-13.4798
Dhrs4	0.0133382	0.0109115	3.00024	2.83349	1.62982	2.30325
Dhx29	0.00773213	0.00729054	3.32117	4.20983	3.20282	2.00974
Dhx33	0.00503553	0.00540752	3.57715	4.42072	3.4003	2.02851
Diaph3	0.000578741	0.00130064	4.94976	5.53414	4.05432	2.78914
Diras2	0.00298221	0.00375692	-3.89561	-2.31403	-0.308403	-4.01564
Dis3	0.00759255	0.00720393	3.33197	5.29291	4.12134	2.25257
Dkc1	0.000339416	0.000949728	5.31655	6.02712	4.22894	3.47782
Dkkl1	0.00786535	0.00738112	3.31105	-0.669197	-3.16936	5.65749
Dlat	0.00102547	0.00184786	4.5705	4.34936	3.29816	2.07225
Dlg4	0.00151375	0.00237451	-4.31973	3.21539	4.85005	-3.10513
Dlgap5	0.00125745	0.00208662	4.43848	5.96014	4.63703	2.50205
Dnah8	0.000203053	0.000717726	-5.68281	5.49596	8.12808	-6.19937
Dnaja3	0.0160883	0.0125465	2.89068	3.97745	2.954	2.03277
Dnajc19-ps	0.000434553	0.00110257	5.14506	2.87954	1.08474	3.46969
Dnajc2	0.00223227	0.00306669	4.07498	5.26386	4.2535	2.01442
Dnajc27	0.0106292	0.00922225	3.13338	3.45912	2.29513	2.24076
Dnajc6	0.0112168	0.00959072	-3.10177	1.20237	5.14666	-15.3939
Dnajc9	0.000384151	0.00102227	5.23026	6.27518	4.4822	3.4653
Dnal4	6.50308e-05	0.000426249	6.54631	3.03936	1.52739	2.85199
Dnase1l2	0.00137948	0.00223628	-4.37903	-0.676508	0.691864	-2.58179
Dnase1l3	0.0797178	0.0433219	-1.95023	-1.30105	0.583676	-3.69284
Dnase2a	0.0018524	0.00271293	4.19189	2.2498	1.20704	2.06018
Dnmt1	0.000103391	0.00051544	6.18554	7.70468	6.51924	2.27433
Dnmt3b	0.00041218	0.00106762	5.1815	3.11228	1.02587	4.24692
Dock2	0.00233705	0.00316492	-4.0464	6.73653	7.80481	-2.09694
Dock5	0.0307635	0.0205781	-2.51282	0.362993	2.28325	-3.7849
Dohh	0.0109336	0.00941542	3.11679	3.33315	2.17333	2.23431
Dop1b	0.0066717	0.00660411	-3.4088	2.31994	4.17988	-3.62991
Dph1	0.000141725	0.000603423	5.94745	2.82589	0.738944	4.24848
Dph3	0.00123929	0.00206722	4.44784	3.83827	2.21672	3.07707
Dpp4	6.70049e-05	0.000432196	6.52264	7.54773	5.24308	4.94048
Dpy19l1	0.0156252	0.0122817	2.90774	4.06786	2.84386	2.33592
Dpy30	0.00151218	0.00237392	4.3204	3.75946	2.41999	2.53059
Drap1	3.16713e-05	0.000325169	7.13329	4.8269	2.93132	3.72071
Drg2	0.000181821	0.000678981	5.76334	4.22083	3.12814	2.1327
Drosha	0.00951667	0.00849919	3.19845	5.50838	4.13479	2.59114
Dscc1	5.58515e-06	0.000216493	8.70378	2.94254	1.10437	3.57556
Dsel	0.0605987	0.034997	-2.11433	-0.255954	2.07693	-5.0381
Dsp	0.00886086	0.00806579	-3.24057	-0.581952	2.50237	-8.48148
Dstyk	0.000171723	0.00065587	-5.80527	0.179754	2.64023	-5.50398
Dtd1	0.0722812	0.0401282	2.00912	1.92622	0.649199	2.42339
Dtd2	7.28495e-05	0.000441917	6.45675	2.36714	0.421222	3.85282
Dtl	0.000513658	0.00120837	5.03062	6.31277	4.71238	3.03225
Dtnbp1	0.00199044	0.00284588	4.14671	3.42772	2.22191	2.30667
Dtwd1	0.000843224	0.00163275	4.6987	1.97168	0.791162	2.26658
Dtx1	3.9807e-05	0.000352334	6.94302	6.96236	1.96215	32.0045
Dubr	0.00212958	0.00296688	-4.10439	-0.551894	2.72749	-9.70943
Dus2	0.00826327	0.00766403	3.28184	3.08447	1.85456	2.34552
Dus4l	0.00966209	0.00859814	3.18952	1.54996	0.453174	2.13878
Dusp10	0.00343786	0.00413506	3.80846	6.25289	4.91948	2.51998
Dusp16	0.0942471	0.049357	-1.84869	1.78867	2.89146	-2.14769
Dusp22	0.0736612	0.040718	1.99777	2.01512	0.870638	2.21066
Dusp28	0.000356469	0.000973712	5.2823	1.90547	0.438397	2.7646
Dusp3	0.0392652	0.0248035	2.37018	1.25979	-0.405768	3.17236
Dusp4	0.0949344	0.0496454	1.84426	3.84574	2.26544	2.99032
Dusp9	7.49062e-05	0.000444628	6.43491	1.65914	-3.8156	44.4696
Dut	0.0022642	0.00309475	4.06612	6.11727	4.54549	2.97272
Dynlrb1	0.00755165	0.00717657	3.33518	4.16334	3.16021	2.00434
Dynlt1-ps1	1.71628e-05	0.00027387	7.66138	5.56595	3.61796	3.85835
Dynlt1b	3.28767e-05	0.000329043	7.10196	5.54059	3.48844	4.14724
Dyrk3	0.00308135	0.00384403	3.87552	0.982001	-1.46798	5.4641
E030022I16Rik	0.000762808	0.00153774	-4.76497	2.52264	3.73076	-2.31035
E2f1	0.00237012	0.00319555	4.03766	3.22881	1.7976	2.69673
E2f2	0.000342383	0.00095601	-5.31046	4.87652	6.37695	-2.82927
E2f3	0.00532405	0.00562912	3.54367	4.31285	3.23053	2.11743
E2f6	0.00164923	0.00251552	4.26528	4.05561	2.84334	2.31702
E330020D12Rik	0.00398189	0.00459257	-3.71899	-0.481394	1.37036	-3.60939
E330034L11Rik	0.00258546	0.00340733	-3.9837	0.0141822	1.27207	-2.39145
E430014B02Rik	1.49543e-05	0.000266964	-7.78391	3.40497	7.02678	-12.3104
Ebag9	0.00145848	0.00231062	4.34344	3.08719	1.9905	2.13864
Ebf1	0.0788352	0.0429153	-1.95694	-0.448762	0.938334	-2.61552
Ebna1bp2	0.000179657	0.000674164	5.77212	5.11583	3.61247	2.83502
Ecd	0.000984799	0.00180586	4.59689	5.21283	3.89977	2.48468
Echs1	0.000350729	0.000968426	5.29363	4.44954	3.0651	2.6107
Eci2	0.00161638	0.00247683	4.27804	5.07108	4.03248	2.05423
Ecsit	0.0020726	0.00291441	4.12136	3.14156	1.94471	2.2924
Eef1a1	7.4297e-05	0.000443058	6.44131	11.7034	9.87924	3.54087
Eef1akmt1	0.00672374	0.00663908	3.40418	2.89881	1.6304	2.40895
Eef1akmt4	0.0110705	0.00949423	3.10948	1.87981	0.309848	2.96897
Eef1b2	2.52512e-05	0.000307367	7.32541	8.109	6.03184	4.21974
Eef1d	1.27556e-05	0.00026204	7.92719	6.06875	4.27348	3.47079
Eef1e1	0.00311333	0.00386968	3.86918	3.99086	2.62687	2.57396
Eef1g	9.70803e-05	0.000502911	6.23378	6.47552	4.6292	3.59582
Eef2	6.69614e-05	0.000432196	6.52316	10.3051	8.56767	3.33453
Eepd1	0.000818367	0.00160496	-4.71844	-0.716859	1.49641	-4.63724
Efemp2	0.000181721	0.000678981	5.76375	2.04308	-1.61518	12.6254
Efr3b	0.000122541	0.000559007	6.05654	2.52353	-1.21752	13.3712
Eftud2	0.000177996	0.000671002	5.77892	5.62887	4.58173	2.06644
Egf	0.00049226	0.0011786	5.05961	0.743134	-0.329381	2.1031
Egfl7	7.71563e-08	4.08974e-05	13.8101	2.59195	-0.667811	9.57823
Egln3	0.00142348	0.00227425	4.35895	4.56594	2.44091	4.36211
Egr1	0.00159007	0.00245545	-4.28846	1.9722	4.32685	-5.11471
Egr2	9.41975e-06	0.000238394	-8.2058	-0.482852	3.19825	-12.8269
Egr3	0.000581142	0.00130359	-4.94696	-2.93155	1.71254	-25.004
Ehbp1	0.0122511	0.0102565	-3.05003	-0.924637	1.06257	-3.96469
Ehd1	0.00405059	0.0046502	3.70861	3.59914	2.15882	2.7138
Ehd3	0.00646313	0.00646367	-3.42772	1.07118	4.19256	-8.7022
Ehd4	0.000170411	0.000654263	5.81091	4.02747	1.8739	4.44925
Eid1	0.0146941	0.011738	2.94362	4.91848	3.86631	2.07364
Eif1a	0.000592502	0.00131669	4.9339	5.64365	3.94955	3.23575
Eif1ad	0.0138573	0.0112315	2.9779	4.74822	3.74003	2.01139
Eif1ax	0.0049167	0.0053284	3.59152	5.73208	4.64441	2.1253
Eif1b	0.0430339	0.0266502	2.31643	4.59993	3.53727	2.08878
Eif2b1	0.000518472	0.00121333	5.02427	4.11348	2.85475	2.39284
Eif2b2	0.00243285	0.00325363	4.02143	4.10294	3.03506	2.09634
Eif2b3	0.00157302	0.00243806	4.2953	3.27403	2.17992	2.13482
Eif2s1	0.00288181	0.00367456	3.91669	5.95125	4.81454	2.1988
Eif2s2	0.00418247	0.00476034	3.68918	5.69857	4.52176	2.26077
Eif2s3x	0.00163931	0.0025054	4.2691	6.64279	5.34571	2.4573
Eif3b	3.68265e-05	0.000341896	7.00739	6.0008	4.37887	3.07787
Eif3c	0.000416292	0.00107348	5.17465	7.07473	5.85267	2.33279
Eif3d	5.17053e-05	0.00038836	6.72969	6.62274	4.91867	3.25819
Eif3e	4.10221e-06	0.000202765	9.00871	7.67268	5.77396	3.72882
Eif3f	2.10408e-05	0.000291754	7.48276	5.98668	4.40301	2.99732
Eif3g	0.000472249	0.00115471	5.08797	4.99955	3.47324	2.88047
Eif3h	4.86939e-05	0.000378625	6.77824	6.87115	5.05512	3.52111
Eif3i	0.00025288	0.000810958	5.52471	5.82829	4.3808	2.72733
Eif3j2	0.000458733	0.00113141	5.10786	4.96999	3.6802	2.44493
Eif3k	0.000170006	0.000654263	5.81266	5.793	4.17972	3.05946
Eif3l	4.9522e-06	0.000209034	8.82164	6.73995	4.99344	3.35545
Eif3m	0.00232024	0.00315267	4.0509	5.86043	4.84123	2.0268
Eif3s6-ps1	2.52015e-06	0.000172056	9.50755	3.66551	1.77386	3.71058
Eif3s6-ps2	0.00103515	0.00185557	4.56439	2.05547	0.455676	3.031
Eif3s6-ps4	0.00747783	0.00712504	3.341	1.41998	0.028512	2.62346
Eif4a-ps4	0.00230574	0.00313749	4.0548	8.39591	7.0378	2.56349
Eif4a3	0.00139797	0.00224883	4.37051	5.34523	4.1333	2.31646
Eif4b	5.6246e-05	0.000403401	6.66198	8.25826	6.65579	3.03664
Eif4ebp1	0.0683566	0.0383892	2.04254	1.45515	-0.0346567	2.80852
Eif4h	0.000248594	0.000799794	5.53694	7.51786	6.42601	2.13147
Eif5	0.00526704	0.0055837	3.55014	7.50929	6.44804	2.08674
Eif5a	9.64503e-06	0.000241025	8.18382	7.73059	5.4581	4.83156
Eif5al3-ps	3.24899e-05	0.000326405	7.11188	3.65589	1.53653	4.34503
Eif6	0.000623136	0.00135891	4.89998	4.98562	3.50993	2.78117
Eipr1	0.000620114	0.0013538	4.90325	4.20997	3.2024	2.01051
Elac1	0.000295358	0.000883473	5.41435	2.48274	1.43485	2.0675
Elac2	3.22629e-05	0.000326405	7.11776	4.06045	2.75611	2.46971
Elmo3	0.00833203	0.00770443	-3.27693	0.822338	2.35688	-2.89697
Elob	0.00430221	0.00486024	3.67209	4.72389	3.53222	2.28417
Elof1	0.000295492	0.000883473	5.41403	4.38303	2.9559	2.6891
Elovl5	0.00720851	0.00695359	3.36278	6.45278	4.98421	2.76747
Elp1	0.00118823	0.00201935	4.47497	5.26072	4.10044	2.23501
Elp3	9.96955e-05	0.000507266	6.21339	5.39063	3.6467	3.34946
Elp6	0.000121839	0.00055837	6.06087	2.5635	1.4284	2.19634
Emc4	0.0014394	0.00229043	4.35185	3.57369	2.33203	2.3647
Emc6	0.00155891	0.00242715	4.30103	3.92857	2.60635	2.5005
Emd	0.00076458	0.00153975	4.76343	3.79712	2.70511	2.13172
Emilin2	0.0513375	0.0306785	2.21256	0.79054	-1.26408	4.15434
Eml4	0.000165256	0.000645812	5.83353	5.9382	4.59785	2.53213
Enc1	0.0204736	0.0150173	2.75013	3.86497	2.56233	2.4668
Endod1	0.0119913	0.0100965	3.06259	2.61853	0.663581	3.87704
Endog	0.00436305	0.00490683	3.6636	0.460823	-1.72953	4.56417
Endou	0.00105243	0.00187502	4.55362	7.91394	6.05268	3.63324
Eno1	0.0161652	0.0125941	2.8879	5.7402	4.18855	2.93151
Enoph1	0.00108787	0.00191684	4.5321	3.03325	1.71406	2.49526
Enpp1	0.000873689	0.00167058	4.67533	1.67923	-0.250536	3.80994
Entpd4	0.00714941	0.00691168	3.36767	3.7694	2.66268	2.15355
Entpd4b	0.00559052	0.00584706	3.51439	3.54902	2.51678	2.0452
Eny2	0.000124801	0.000563494	6.04277	5.20111	4.03685	2.24118
Epas1	3.63854e-05	0.000339369	7.01739	3.98126	-0.593743	23.835
Epb41l4aos	0.000217224	0.000743561	5.63394	1.86631	0.036579	3.55471
Epb41l5	7.00368e-05	0.000436035	6.48772	3.03253	0.850847	4.53684
Ephx1	0.02201	0.0158745	-2.70798	1.25695	2.78015	-2.87429
Epn2	0.00837442	0.00773823	3.27393	1.06575	-1.116	4.53702
Erap1	0.0275485	0.0188723	2.5772	6.19505	5.16037	2.04866
Erc1	0.00392163	0.00453755	-3.72825	2.83412	4.30555	-2.77298
Ergic1	0.000714487	0.0014781	4.80847	4.77033	2.98492	3.44716
Erh	2.41243e-05	0.000305558	7.36456	4.69766	2.92683	3.4125
Esd	0.00937345	0.00840367	3.20739	4.74243	3.57061	2.25295
Espl1	0.00510234	0.00545803	3.56922	5.27983	4.17531	2.15028
Esr1	0.0640898	0.0365084	-2.081	-0.00426798	1.399	-2.64499
Etf1	0.00163581	0.00250349	4.27046	6.64229	5.44719	2.28961
Etfa	0.000573517	0.00129182	4.95588	3.72239	2.44423	2.4253
Etfb	0.000897912	0.00169648	4.65736	3.75492	1.63234	4.35472
Etl4	0.0109641	0.00943356	-3.11515	-1.71096	0.449872	-4.47173
Etv5	0.00067744	0.00142871	4.84399	5.17603	1.5319	12.5024
Evi2b	0.0426352	0.0264611	-2.32189	2.89342	4.01158	-2.1707
Evi5	1.391e-05	0.000266964	7.84889	3.80654	1.17936	6.17818
Exo1	0.000357999	0.000973712	5.27931	4.60801	3.0921	2.85978
Exoc6b	0.00551129	0.00578858	-3.52294	2.11377	4.43015	-4.98082
Exosc1	0.00343103	0.00413486	3.80967	2.9708	1.69184	2.42664
Exosc2	0.000170434	0.000654263	5.81081	4.73325	3.14369	3.00958
Exosc3	0.00205375	0.00289678	4.12708	3.95785	2.73382	2.336
Exosc4	0.000163098	0.0006429	5.84323	3.61001	1.92988	3.20456
Ext2	0.012059	0.0101404	3.05929	4.46996	3.44956	2.02849
Extl2	0.000218448	0.000745677	5.62988	3.05747	1.18106	3.67161
Eya2	0.0105625	0.00918549	-3.13708	-1.41851	1.69258	-8.64038
F13a1	0.00890917	0.00809418	-3.23736	2.29998	5.64563	-10.1658
F2rl3	0.0339195	0.0221922	2.4558	2.05031	0.517273	2.89394
F730311O21Rik	0.000292152	0.000878742	-5.42207	-2.31453	1.8155	-17.509
F8	0.0163557	0.0127001	2.88106	1.49775	0.366646	2.19026
F830112A20Rik	0.0211796	0.0154269	-2.73038	2.11873	3.16092	-2.05936
Faah	0.0304395	0.0204163	-2.519	1.17308	4.11317	-7.67462
Faap24	0.00369984	0.00435411	3.76366	2.35269	1.34241	2.0143
Fabp5	0.0156113	0.0122732	2.90826	4.05353	2.13086	3.79126
Fahd1	0.00876984	0.00800127	3.24667	0.924242	-0.19391	2.17069
Fahd2a	0.00310466	0.0038622	3.87089	1.68661	0.676817	2.01362
Fam102a	0.0136033	0.0110963	-2.98873	2.45208	4.18287	-3.31911
Fam111a	0.000600279	0.00132801	4.92512	6.05254	4.74289	2.47883
Fam136a	0.0248435	0.0174033	2.63743	3.80689	2.51117	2.45498
Fam162a	0.00638022	0.00640818	3.43542	3.28652	1.87318	2.66354
Fam174a	0.0265447	0.0183332	2.59883	2.82136	1.64616	2.25824
Fam193b	0.000824775	0.00161346	-4.71329	5.32781	6.51874	-2.283
Fam210b	0.0415295	0.0259084	2.33731	1.20301	-0.0494589	2.38249
Fam214a	0.00280693	0.00360118	-3.93291	3.41267	4.69393	-2.43051
Fam220a	0.0160275	0.0125089	2.89289	2.99113	1.88622	2.15085
Fam234b	0.0552122	0.0325243	-2.16955	2.40661	4.35007	-3.84628
Fam49a	0.0105276	0.00916111	-3.13902	2.02643	3.53041	-2.83624
Fam72a	0.00358576	0.00424535	3.78275	2.13083	0.782586	2.54601
Fam78a	0.00297701	0.0037531	-3.89669	4.90932	6.47656	-2.96336
Fanca	0.00118209	0.00201627	4.47832	4.01739	2.78435	2.35063
Fancd2	0.00114391	0.00197959	4.49954	4.23774	3.16118	2.109
Fance	0.00438603	0.00491939	3.66042	3.00949	1.8668	2.20793
Fancl	0.0189776	0.0142031	2.79435	3.08269	2.06613	2.02308
Fas	0.0120664	0.0101404	-3.05893	1.45288	4.24916	-6.94649
Fasn	0.0132411	0.0108477	3.00452	6.56137	5.31337	2.37512
Fau	4.37497e-05	0.000359155	6.86546	5.7389	3.99532	3.34867
Fbl	5.80673e-05	0.00040751	6.63647	3.47214	1.71079	3.39014
Fbxl12	0.000353597	0.000972752	-5.28794	4.21648	5.52504	-2.47693
Fbxl12os	6.71984e-05	0.000432742	-6.52036	0.509869	1.53271	-2.03192
Fbxl19	0.00277088	0.00356724	3.94089	3.74976	2.5647	2.27373
Fbxl6	5.27757e-05	0.000393584	6.71317	4.07478	2.86718	2.30954
Fbxo17	1.75935e-07	5.88093e-05	12.6628	2.13347	-0.747487	7.36639
Fbxo31	0.000145622	0.000612722	5.92724	3.49986	2.0754	2.68415
Fbxo34	0.00241505	0.00323579	4.02599	4.52422	3.00041	2.8755
Fbxo4	0.000772446	0.00154819	4.75665	1.32097	-0.230067	2.93028
Fbxo44	0.0345204	0.0224744	2.44554	0.796347	-0.970497	3.40309
Fbxo6	0.0277627	0.0189895	2.57268	1.50487	0.141113	2.57355
Fbxw9	3.96949e-05	0.000352334	6.94534	1.82989	0.412618	2.6708
Fcf1	0.00183754	0.0026996	4.19696	3.33909	2.27097	2.09671
Fcgr3	0.0548253	0.0323395	2.17371	1.6155	-0.0063	3.07759
Fchsd2	0.000623824	0.00135966	-4.89924	3.8177	5.14551	-2.51021
Fcmr	0.0347886	0.0226119	-2.44101	-2.1351	-0.322217	-3.51344
Fcrl1	0.0892287	0.0472525	-1.88201	-1.59221	0.011384	-3.039
Fcrla	0.0339424	0.0222036	-2.4554	-2.30585	-0.182664	-4.35654
Fdx1	0.0011197	0.00195451	4.51339	2.03088	0.68874	2.53527
Fdx1l	6.34099e-05	0.000424123	6.56633	2.29627	-0.284121	5.98103
Fech	0.00260983	0.00342915	3.97789	4.03129	2.34528	3.21766
Fen1	0.00118757	0.00201935	4.47533	5.71398	4.24008	2.77771
Ffar1	0.0449873	0.0276274	-2.29035	-3.21839	-1.92953	-2.44335
Fgd2	0.0371746	0.0237586	-2.40222	-0.0158792	1.38436	-2.63946
Fgfrl1	0.0270427	0.0185899	2.588	1.32321	0.25449	2.09757
Fgl2	0.0317534	0.0210664	-2.49434	0.820433	1.87805	-2.0815
Fgr	0.0231186	0.0164665	2.67935	3.06905	1.68536	2.60934
Fh1	0.000255926	0.000817292	5.51616	4.93669	3.34621	3.01149
Fkbp3	0.0026173	0.0034333	3.97613	5.55374	4.46051	2.13351
Fkbp4	0.00970058	0.00863046	3.18717	6.02318	4.81631	2.30836
Fkbp5	1.71202e-06	0.000150959	9.9193	8.61999	5.97482	6.25569
Fkbp7	0.000815208	0.00160272	4.721	0.3079	-0.882087	2.28151
Flt3	0.000892172	0.00169046	-4.66158	-0.478626	1.26847	-3.35682
Flt3l	0.00707391	0.00686007	-3.37398	1.12209	2.74282	-3.0753
Flywch1	0.00328076	0.00400514	3.83707	3.86711	2.75089	2.16778
Fmc1	0.00118026	0.00201528	4.47932	1.86225	-0.0717147	3.82104
Fmo5	8.572e-05	0.000468493	-6.3298	-1.48036	0.682413	-4.47775
Fnbp1	0.00280462	0.00359938	-3.93342	5.22971	6.23102	-2.00181
Fnbp1l	0.021545	0.0156127	-2.72041	-0.139629	2.51713	-6.30616
Fnip1	0.0514292	0.0307286	-2.21151	3.94689	4.98296	-2.05065
Fntb	0.000515973	0.00121095	5.02756	3.24721	1.97855	2.40939
Foxred2	0.0238286	0.0168588	2.66173	2.91129	1.36549	2.91967
Fpgs	0.0011668	0.00200263	4.48673	2.94383	1.29419	3.13755
Frmd4a	0.00818607	0.0076102	3.28739	4.07257	2.73049	2.53517
Fstl3	0.00125972	0.00208901	4.43732	0.997299	-2.15361	8.88216
Ftl2-ps	0.0107734	0.00930369	3.12546	0.960484	-0.314827	2.42051
Ftsj3	0.000991906	0.00181294	4.5922	5.48341	4.22678	2.38938
Fuca1	0.00380789	0.00444216	3.74614	3.79051	2.67691	2.16385
Fuca2	0.00118283	0.00201627	4.47792	3.50682	2.33552	2.25215
Fundc2	3.62083e-05	0.000338512	7.02144	4.48519	2.7308	3.37383
Fus	0.018363	0.0138633	-2.81354	5.81244	6.8189	-2.00899
Fut10	0.00937376	0.00840367	3.20737	2.52627	0.818338	3.26692
Fxn	0.000170833	0.000654558	5.80909	2.73971	1.17623	2.95567
Fzd5	0.000212562	0.000735908	5.64963	3.47862	1.15277	5.01361
Fzd7	2.65028e-07	7.0203e-05	12.1249	2.50859	-0.176979	6.43335
G3bp1	0.000728164	0.00149655	4.79585	7.26043	5.93374	2.50826
G6pc3	1.78453e-05	0.000275421	7.62695	1.84077	-0.259812	4.28882
G6pdx	0.00210999	0.00294682	4.11017	4.15675	3.01611	2.20479
Gaa	0.00169715	0.00256401	4.24714	3.27389	1.8502	2.68269
Gab3	1.99589e-05	0.000289433	-7.52875	0.116276	1.28246	-2.24418
Gabbr1	0.000828646	0.00161713	-4.7102	2.0694	5.63288	-11.8226
Gadd45gip1	0.0062122	0.00629672	3.45134	3.62383	2.45138	2.25394
Gale	0.00858289	0.00787409	3.2594	2.11917	0.930318	2.27971
Galk1	0.000539958	0.00124014	4.99669	4.36185	2.33946	4.06255
Galns	0.0260259	0.0180597	2.61033	2.87789	1.42542	2.73676
Galnt6	0.00231146	0.00314313	4.05325	6.61505	5.33961	2.42073
Gapdh	0.000227816	0.000763228	5.5996	6.28503	4.72803	2.94242
Gapdh-ps15	0.000143959	0.000609156	5.93579	3.31268	1.62226	3.22749
Gar1	6.90958e-06	0.00022642	8.49829	2.96796	0.853806	4.32937
Gars	0.000913479	0.00171448	4.64608	5.81571	4.13413	3.2078
Gart	9.53447e-05	0.000496509	6.24764	5.87246	4.04311	3.55377
Gas2	0.000209052	0.000729033	5.66169	1.65475	-1.00035	6.29888
Gas6	0.0350747	0.0227644	-2.43623	-1.14611	1.16482	-4.96203
Gata1	0.0487393	0.0294223	2.24319	-0.105036	-1.99824	3.71459
Gatm	0.000920417	0.00172343	4.64112	1.55992	-1.20185	6.78226
Gbe1	0.0014811	0.00233993	4.33363	3.56177	2.32832	2.35129
Gbp4	0.00211145	0.00294783	-4.10973	4.42004	6.15826	-3.33623
Gbp5	0.000370065	0.000994868	-5.25622	-0.49764	1.30488	-3.48829
Gbp7	0.0621557	0.035699	-2.09925	3.10751	4.24147	-2.1946
Gbp9	0.0281353	0.0192048	-2.56491	4.49544	5.59729	-2.14629
Gcat	0.0342262	0.0223387	2.45054	-1.04198	-2.5754	2.89473
Gch1	0.0117111	0.00990462	3.07646	3.1174	1.87709	2.3625
Gclm	0.0226473	0.0162428	2.69135	4.57773	3.40704	2.2512
Gcsam	0.0313825	0.0208587	-2.5012	-3.60432	-1.5084	-4.275
Gcsh	2.07776e-05	0.000291754	7.49371	3.68302	1.0042	6.40328
Gda	0.00357345	0.00423584	3.78485	2.75378	-0.0512322	6.98863
Gdap10	0.0126545	0.0105107	-3.03105	1.60133	2.73604	-2.19575
Gdi1	0.00519075	0.00552521	-3.5589	4.43985	5.60487	-2.24237
Gemin2	0.00123525	0.00206308	4.44995	3.03771	2.02159	2.02247
Gemin6	0.00524319	0.00556584	3.55286	2.8411	1.71323	2.18537
Gemin7	0.00385671	0.00448674	3.7384	2.99604	1.8414	2.22628
Gfm1	0.00308018	0.00384378	3.87575	4.33404	3.19287	2.2056
Ggact	3.18643e-05	0.00032547	7.12819	3.55431	1.4852	4.19626
Ggt5	0.0236136	0.0167484	-2.66701	-1.55567	0.657188	-4.63591
Ghitm	0.00321062	0.00394828	3.8503	6.51759	5.10097	2.66959
Gimap1os	0.0148877	0.0118474	-2.93597	2.49297	3.87288	-2.60252
Gimap3	0.000129765	0.000574637	-6.01343	1.39729	4.74707	-10.1949
Gimap6	0.0130222	0.0107326	-3.01427	5.49507	6.98598	-2.81066
Gimap8	0.00296029	0.0037376	-3.90015	4.89725	6.52987	-3.10077
Gins1	0.000923094	0.00172564	4.63922	3.29097	1.82705	2.75857
Gins2	8.68538e-05	0.000471762	6.31962	4.03445	1.58442	5.46428
Gins4	0.000116234	0.0005472	6.09647	4.00396	2.72966	2.41881
Gipc1	0.00468545	0.00513285	3.62054	3.28624	2.02012	2.40514
Git2	0.000294556	0.000883298	-5.41627	5.70695	6.79676	-2.12847
Gk5	0.000985344	0.00180586	4.59653	4.62734	2.51343	4.32863
Gla	4.95982e-05	0.000383405	6.76333	1.89193	0.615152	2.42297
Glipr1	0.0161079	0.0125592	-2.88998	0.875001	3.34492	-5.54013
Glipr2	0.0230371	0.0164334	2.6814	3.14907	2.01802	2.19018
Glmn	0.00214235	0.00297944	4.10065	2.80675	1.70486	2.14636
Glod4	0.000701047	0.0014599	4.82112	4.85116	3.49188	2.56557
Glrx3	0.000152271	0.000623094	5.89406	4.93546	3.25718	3.20046
Glrx5	0.000392371	0.00103819	5.21557	3.94233	2.30236	3.11658
Glud-ps	0.00263151	0.00344169	3.97278	2.34289	1.07435	2.40917
Glud1	0.00691517	0.00675757	3.38747	5.82482	4.72566	2.14231
Gm10012	0.000256089	0.000817292	5.5157	4.24419	2.48691	3.38062
Gm10020	0.00223204	0.00306669	4.07504	5.63215	0.706405	30.3946
Gm10036	8.54832e-05	0.000467842	6.33195	6.22593	4.29824	3.80445
Gm10039	9.43966e-05	0.000494814	6.25533	4.30101	1.98118	4.99274
Gm10045	4.60691e-05	0.000367933	6.82328	2.44238	0.760811	3.20777
Gm10051	2.15144e-05	0.000293758	7.46343	2.71352	0.0632617	6.27778
Gm10052	3.43287e-06	0.000192705	9.18857	7.96829	6.29522	3.18893
Gm10053	0.00496105	0.00535358	3.58611	5.25464	4.02857	2.33929
Gm10073	0.000563288	0.00127456	4.96805	6.80479	4.95791	3.59722
Gm10075	0.00728719	0.0070089	3.35633	2.21714	1.16506	2.07351
Gm10076	0.000476519	0.00116229	5.08182	5.96687	3.95651	4.02881
Gm10095	3.99036e-05	0.000352334	6.94102	2.58751	0.638133	3.86208
Gm10110	8.8595e-06	0.000235474	8.26305	4.92927	2.86966	4.16874
Gm10120	6.10736e-05	0.000414106	6.59619	3.30964	1.45296	3.62174
Gm10123	0.0065854	0.00654641	3.41656	8.50287	7.16285	2.53155
Gm10131	1.14841e-05	0.0002535	8.02287	5.6756	3.53377	4.41321
Gm10132	8.6348e-05	0.000471277	6.32414	6.64566	4.71194	3.82039
Gm10136	0.00974182	0.00864972	3.18467	1.27372	-0.0615788	2.52328
Gm10145	0.000848002	0.00163813	4.69498	3.29738	1.72933	2.96503
Gm10146	0.000136453	0.000589384	5.97577	3.21936	1.3669	3.61116
Gm10154	0.000157504	0.000633419	5.86902	2.13971	-0.0504501	4.56357
Gm10155	2.08152e-05	0.000291754	7.49214	1.56933	-0.297884	3.64829
Gm10156	5.67621e-05	0.000404184	6.65466	5.30314	2.5685	6.65591
Gm10163	5.81816e-05	0.00040751	6.6349	5.8061	3.97837	3.54977
Gm10169	3.61714e-05	0.000338512	7.02229	3.66163	0.619265	8.23839
Gm10171	0.0314958	0.0209165	2.49909	1.66914	0.100901	2.96543
Gm10175	1.3557e-05	0.000262763	7.87206	6.61735	4.15863	5.49727
Gm10177	0.0066936	0.00661976	3.40685	4.74855	3.25611	2.81364
Gm10182	0.000465002	0.0011404	5.09856	4.75058	2.8261	3.796
Gm10193	1.1414e-05	0.0002535	8.02848	1.00808	-1.23944	4.74865
Gm10221	5.44903e-05	0.00039875	6.68744	5.33931	3.26484	4.21192
Gm10231	3.59778e-05	0.000338512	7.02675	1.40557	-1.59925	8.02676
Gm10232	0.000457321	0.0011308	5.10998	4.98378	3.78586	2.29408
Gm10233	0.0010388	0.00185979	4.56209	2.02248	-0.0963138	4.34331
Gm10240	6.81203e-05	0.00043417	6.5096	5.80181	4.0256	3.42527
Gm10241	0.00279019	0.00358665	3.9366	4.30443	3.29823	2.00862
Gm10243	0.00100652	0.00182613	4.58266	4.81553	3.20281	3.05828
Gm10257	0.000232773	0.00077138	5.58411	1.26332	-0.0748335	2.52828
Gm10260	2.04285e-05	0.000290929	7.50847	7.9782	5.78857	4.56188
Gm10263	0.000170125	0.000654263	5.81214	3.86194	1.73157	4.37828
Gm10269	0.000500304	0.00119034	5.04856	2.69319	0.673173	4.05588
Gm10273	0.00408681	0.00467826	3.70321	5.44179	3.95816	2.79651
Gm10275	4.72055e-05	0.000373632	6.80345	9.49049	7.25004	4.72544
Gm10282	0.00429493	0.00485772	3.67312	6.57932	5.43123	2.21621
Gm10284	0.000257857	0.000820954	5.5108	2.51921	0.998918	2.86848
Gm10288	4.54426e-05	0.000364029	6.83444	8.26549	6.32943	3.82658
Gm10291	7.382e-05	0.000443058	6.44636	1.35442	-0.359343	3.28015
Gm10293	0.000312938	0.000905988	5.37356	1.78903	-0.185983	3.93133
Gm10320	0.00394542	0.00455844	3.72458	3.51227	1.8224	3.22628
Gm10335	1.61346e-06	0.000150959	9.98373	6.82333	4.68686	4.39683
Gm10358	8.11566e-05	0.000461473	6.37231	3.41101	1.55783	3.61297
Gm10359	8.38957e-05	0.000462338	6.34649	4.73729	2.93267	3.49336
Gm10420	1.45508e-05	0.000266964	7.80842	2.64009	-0.0040515	6.25123
Gm10443	6.54067e-05	0.000427141	6.54175	6.44976	4.20319	4.74554
Gm10451	0.0619629	0.0355985	2.1011	2.95685	0.736707	4.6594
Gm10481	0.000273214	0.000846117	5.46959	2.34724	0.520571	3.54718
Gm10501	0.00189911	0.00275701	4.17621	1.22585	0.0655211	2.23509
Gm10521	6.5432e-08	4.08974e-05	-14.0505	0.710849	2.60852	-3.72612
Gm10566	0.000528573	0.00122962	5.01116	1.32525	-0.0865853	2.66076
Gm10608	0.000267878	0.000838233	5.48362	1.17482	-0.242288	2.67049
Gm10651	0.0136879	0.0111402	2.9851	1.47455	-0.0274608	2.83238
Gm10676	0.00263532	0.00344243	-3.97188	1.34555	2.79923	-2.73906
Gm10689	9.71488e-06	0.000241253	8.17711	1.87126	-0.154272	4.07143
Gm10698	0.000547794	0.00125451	4.98693	5.07578	3.75814	2.49258
Gm10704	0.00151955	0.00238173	4.3173	4.61704	3.16253	2.74064
Gm10705	0.000840017	0.00162892	4.70121	3.30558	1.92036	2.61213
Gm10717	2.60509e-05	0.000307631	7.29875	5.34746	-2.93137	310.581
Gm10718	1.77585e-05	0.000275421	7.63125	7.21191	-0.131641	162.416
Gm10719	3.16095e-05	0.000325169	7.13493	5.77002	-2.37026	282.143
Gm10774	0.0349302	0.0226817	2.43864	0.410634	-0.901555	2.48318
Gm10800	6.80056e-06	0.00022642	8.51352	10.122	0.85359	616.685
Gm10819	0.000235841	0.00077785	5.5747	3.57863	1.22583	5.10816
Gm10916	9.07324e-05	0.000483906	6.28584	0.989691	-1.45778	5.45458
Gm10925	0.000845692	0.00163594	4.69678	10.3994	9.37871	2.02883
Gm10933	0.00156193	0.00243008	-4.2998	0.994921	2.15175	-2.22966
Gm11221	0.00177199	0.00263598	4.21987	2.85286	1.81993	2.04617
Gm11223	0.000391226	0.00103678	5.2176	6.06235	4.7654	2.45708
Gm11224	0.000478107	0.00116545	5.07954	1.83924	0.644287	2.28937
Gm11246	0.000760354	0.00153513	4.76711	0.956143	-0.979256	3.82484
Gm11249	2.17409e-06	0.00015997	9.66315	2.41321	-0.287523	6.50134
Gm11273	0.000301189	0.000893746	5.40054	3.61408	1.83359	3.43543
Gm11353	3.82274e-05	0.000349978	6.97646	1.47495	-0.836169	4.96267
Gm11361	7.30953e-05	0.000442058	6.4541	7.736	5.59579	4.40829
Gm11407	0.000156914	0.000632324	5.8718	4.14199	2.62873	2.85454
Gm11408	0.000975831	0.00179921	4.60286	4.2332	3.05457	2.26361
Gm11423	0.00343426	0.00413506	3.8091	0.153537	-1.10099	2.3859
Gm11425	0.00195048	0.00280793	4.15944	1.2878	0.161003	2.18373
Gm11451	6.07364e-05	0.000413229	6.6006	1.12332	-1.32524	5.45872
Gm11478	0.000124236	0.000561614	6.04619	7.43957	5.47981	3.88997
Gm11488	0.000588846	0.0013128	4.93808	3.15794	2.03263	2.1815
Gm11512	0.0049176	0.0053284	3.59141	5.26503	4.24865	2.02283
Gm11516	0.000560864	0.00127052	4.97096	1.07742	-0.692402	3.41011
Gm11518	1.89727e-05	0.000284315	7.57309	6.25944	4.39661	3.6372
Gm11539	0.000740113	0.00151271	4.78502	3.30253	1.35073	3.86858
Gm11560	1.63603e-05	0.00027256	7.70381	4.97782	3.17462	3.48993
Gm11605	0.00604216	0.0061891	3.46791	2.95333	1.8014	2.22212
Gm11652	0.00421305	0.00478515	3.68477	3.39515	2.27422	2.17486
Gm11675	3.20778e-05	0.000326405	7.12258	2.79857	0.828608	3.91758
Gm11687	4.23249e-06	0.000202765	8.97743	1.22325	-1.13981	5.1446
Gm11703	0.000107032	0.000524781	6.15912	1.92178	-0.125779	4.13407
Gm11737	0.007996	0.007479	-3.30129	-1.13037	0.651469	-3.43863
Gm11808	5.0622e-05	0.00038557	6.7468	8.41652	6.60149	3.51866
Gm11839	0.0470516	0.0286209	-2.26395	0.324408	1.38806	-2.09022
Gm11868	0.00218547	0.00302144	4.0882	3.30695	2.15711	2.2189
Gm11878	4.61151e-05	0.000367933	6.82247	1.91179	-0.320529	4.69887
Gm11892	0.021261	0.0154663	2.72815	1.0599	-0.196178	2.38846
Gm11914	0.00245314	0.00327312	4.01627	0.825935	-0.199762	2.03594
Gm11942	0.000214967	0.000741825	5.64149	0.919096	-1.33717	4.77754
Gm11993	0.000459911	0.00113221	5.10611	3.02213	1.62558	2.63272
Gm12009	0.000318048	0.000913085	5.36217	1.96333	0.362193	3.03382
Gm12020	0.00126746	0.00209923	4.43338	2.04154	0.739804	2.46525
Gm12033	0.000127759	0.000569731	6.02514	4.31243	2.63202	3.20517
Gm12070	0.000257192	0.000819493	5.51264	4.45113	2.78848	3.16597
Gm12091	2.59816e-06	0.000172056	9.47569	2.05367	-0.623399	6.39555
Gm12096	0.0010295	0.00185197	4.56795	0.901918	-0.815337	3.2881
Gm12112	0.00139091	0.00224193	4.37376	1.64589	0.322764	2.50207
Gm12138	0.00258928	0.00341117	3.98279	2.58669	1.15461	2.69837
Gm12174	0.000246721	0.000797643	5.54235	7.20402	5.72874	2.78038
Gm12184	0.000678637	0.00143027	4.84281	5.05843	3.00473	4.15168
Gm12191	3.40315e-05	0.000332202	7.07309	6.66093	4.67076	3.97285
Gm12231	0.000317141	0.00091246	5.36418	4.93235	3.24574	3.21901
Gm12251	0.0026655	0.00347111	3.96484	3.1076	2.04952	2.08217
Gm12254	6.85287e-05	0.00043417	6.50488	6.12273	4.16435	3.88627
Gm12261	0.00309437	0.00385663	3.87293	1.30762	-0.137446	2.72275
Gm12267	0.000458364	0.0011312	5.10842	0.776547	-0.962197	3.33744
Gm12286	0.000581037	0.00130359	4.94709	1.8553	0.114997	3.34106
Gm12338	0.00121141	0.00203952	4.46251	3.96155	2.36857	3.01672
Gm12350	0.0011878	0.00201935	4.47521	3.69617	2.0867	3.0514
Gm12355	0.00429839	0.00486024	3.67263	5.12284	4.10515	2.02467
Gm12366	0.00010647	0.000523188	6.16314	3.30491	1.20009	4.30143
Gm12411	0.000420966	0.00108121	5.16694	3.8728	2.41923	2.73885
Gm12537	0.000103836	0.000516363	6.18226	4.3407	2.55183	3.45544
Gm12565	0.00876096	0.00799867	3.24727	0.552263	-0.588121	2.2044
Gm12599	5.5208e-05	0.000399937	6.67693	1.91934	0.606539	2.48424
Gm12657	0.000454674	0.00112908	5.11396	0.138073	-1.30638	2.7216
Gm12663	0.000112514	0.000536683	6.12113	2.63274	1.15462	2.78586
Gm12669	0.000101862	0.000510382	6.19693	5.67037	3.61547	4.15514
Gm12671	0.000117812	0.000549817	6.08627	4.71599	2.99613	3.29403
Gm12693	0.00049001	0.00117713	5.06274	3.32868	2.1434	2.27407
Gm12715	0.0161851	0.0126024	2.88718	6.34748	5.22861	2.17175
Gm12722	3.68284e-05	0.000341896	7.00734	1.05371	-0.615422	3.18023
Gm12734	0.00334134	0.00405754	3.82587	2.05845	0.825796	2.34999
Gm12751	5.0239e-05	0.000385359	6.75294	2.56155	0.423727	4.40099
Gm12791	0.000201866	0.000714866	5.68707	1.4935	-0.106072	3.03054
Gm12856	0.0217459	0.0157298	2.71501	2.79972	1.60348	2.2914
Gm12857	5.39401e-05	0.000397309	6.6956	1.87	-0.578023	5.45667
Gm12870	0.000270536	0.000842758	5.47659	1.37328	-0.472994	3.5957
Gm12906	0.000264342	0.000830924	5.49308	0.716969	-0.710822	2.69034
Gm12918	0.000107744	0.000524781	6.15407	8.07597	6.13273	3.84567
Gm12922	3.49197e-06	0.000192705	9.17122	2.46255	-0.281757	6.70066
Gm12940	7.66758e-05	0.000453361	-6.41663	2.9486	4.01943	-2.10065
Gm12988	0.00233452	0.00316365	4.04708	2.17548	1.1116	2.09055
Gm12989	0.000271738	0.000844179	5.47344	3.36426	1.79281	2.97204
Gm13050	3.07479e-05	0.000322353	7.15818	5.64213	3.80346	3.5768
Gm13092	1.34588e-05	0.000262415	7.87862	4.26316	2.0752	4.55661
Gm13127	5.77585e-05	0.00040751	6.64073	4.53067	2.99347	2.90231
Gm13167	0.0405535	0.0254193	2.35126	0.933926	-0.282806	2.3242
Gm13192	0.000561295	0.00127078	4.97044	0.942344	-1.75536	6.48768
Gm13196	0.000874305	0.00167072	4.67487	1.80719	-0.0661798	3.66388
Gm13212	0.0820638	0.044304	-1.93272	3.29788	4.78767	-2.80848
Gm13237	0.0144408	0.0115822	2.95378	5.69724	4.48003	2.32497
Gm13292	0.00012285	0.000559727	6.05464	3.49871	1.81146	3.22042
Gm13328	0.00194086	0.00280017	4.16254	3.29239	1.76437	2.88388
Gm13331	0.00120313	0.00203235	4.46693	1.77912	0.62689	2.22257
Gm13339	0.000201031	0.000714044	5.69008	6.62649	5.46365	2.23897
Gm13340	0.000555067	0.00126519	4.97799	11.9556	10.9413	2.01983
Gm13341	0.000151039	0.000621894	5.90009	3.36634	1.85214	2.85639
Gm13370	5.12369e-05	0.00038557	6.73704	5.73337	4.04456	3.22392
Gm13394	0.0114623	0.0097461	3.08906	4.45545	3.15979	2.45489
Gm13408	0.0150167	0.0119094	2.93093	2.80307	1.75361	2.06976
Gm13422	0.00748198	0.00712569	3.34068	2.86955	1.86585	2.00514
Gm13436	0.000482395	0.00116688	5.07344	6.98619	5.08285	3.74079
Gm13453	0.000151817	0.000621894	5.89627	2.77845	1.51821	2.39537
Gm13456	0.000100091	0.000507266	6.21035	9.80294	8.00982	3.46566
Gm13461	0.000530543	0.00123074	5.00863	5.73211	3.95403	3.42969
Gm13464	0.000238779	0.000781505	5.56581	2.84271	0.860506	3.95097
Gm13487	0.0014233	0.00227425	4.35904	2.66409	1.29035	2.59141
Gm13493	0.0541388	0.0320297	2.18116	0.9898	-0.22953	2.32839
Gm13498	6.82287e-05	0.00043417	6.50835	1.87663	-0.312402	4.55999
Gm13502	7.77431e-05	0.00045415	6.40582	2.29382	0.879609	2.66515
Gm13532	0.000596443	0.00132247	4.92944	0.535052	-1.65463	4.56204
Gm13552	0.00107779	0.00190414	4.53814	0.608999	-1.25888	3.64995
Gm13611	0.000244479	0.000792977	5.54889	4.99463	2.87106	4.35769
Gm13653	0.000221003	0.000749247	5.62149	1.33327	-0.865633	4.59131
Gm13680	0.000163952	0.000643713	5.83937	6.72692	4.82982	3.72464
Gm13712	0.011249	0.00960995	3.10009	1.86931	0.328953	2.90866
Gm13736	0.0368338	0.0235787	2.40761	2.74974	1.65329	2.13828
Gm13835	0.00116035	0.00199328	4.49032	5.45002	4.09053	2.56595
Gm13904	2.38576e-05	0.000305558	7.37412	0.83795	-1.1091	3.85587
Gm13910	0.00618114	0.00628287	3.45433	5.36338	4.26239	2.14502
Gm14017	0.00396887	0.00458175	3.72098	1.38374	0.316241	2.0958
Gm14032	0.00430098	0.00486024	3.67227	0.260159	-1.48512	3.3526
Gm14038	0.00160286	0.00246658	4.28337	1.63692	0.246307	2.6219
Gm14117	0.0086472	0.00791481	3.25499	2.44019	1.40431	2.05036
Gm14121	0.00735935	0.00704946	3.35048	3.93077	2.82757	2.14831
Gm14131	0.00392446	0.0045395	3.72781	1.11965	-0.157304	2.42327
Gm14150	0.0001994	0.000711845	5.696	4.33992	2.31959	4.05679
Gm14176	0.000581368	0.00130359	4.9467	4.45564	3.20894	2.37298
Gm14269	0.00050484	0.00119541	5.04241	3.63843	2.19473	2.72018
Gm14270	0.0285618	0.0194158	2.55614	2.95123	1.91313	2.05353
Gm14276	0.000408168	0.00106121	5.18826	0.921314	-0.293295	2.32078
Gm14277	0.000613128	0.00134446	4.91086	2.73428	1.00177	3.32305
Gm14303	0.000772668	0.00154819	4.75646	6.77537	5.11398	3.16321
Gm14373	0.000207304	0.000726355	5.66778	3.67307	2.36964	2.46816
Gm14388	0.000853791	0.0016444	4.6905	2.13984	0.924815	2.32144
Gm14399	0.0605284	0.0349614	-2.11502	0.706432	2.44847	-3.34507
Gm14414	7.09758e-05	0.000438398	6.47723	4.77925	3.02673	3.36947
Gm14438	5.25361e-05	0.000393584	6.71683	2.24523	-0.525963	6.82674
Gm14494	4.04726e-05	0.000355777	6.92936	4.97179	2.95529	4.04601
Gm14539	0.000549474	0.0012569	4.98485	2.12151	0.305189	3.52181
Gm14567	0.000491379	0.00117847	5.06084	2.85664	0.889798	3.90911
Gm14586	5.42449e-05	0.000398397	6.69107	7.94816	6.14027	3.50129
Gm14633	0.000748026	0.00152184	4.77796	0.644646	-1.26837	3.76597
Gm14648	0.000668327	0.00142309	4.85304	3.51937	1.61863	3.73404
Gm14681	0.000157294	0.000633212	5.87001	6.9181	5.16783	3.36421
Gm14706	0.00262325	0.00343614	3.97472	0.535545	-1.41023	3.85244
Gm14719	0.0832377	0.0448267	1.92414	0.48322	-0.608328	2.13103
Gm14760	0.000130097	0.000574637	6.01151	4.52128	2.6751	3.59546
Gm14780	9.28646e-06	0.000238053	8.21908	0.0974726	-2.24162	5.05985
Gm14830	0.0100256	0.00884047	3.16777	0.767208	-0.522855	2.44539
Gm14857	8.86067e-05	0.00047627	6.30415	2.71991	0.780737	3.83487
Gm14928	0.000189031	0.000689676	5.73491	0.424027	-1.89173	4.97867
Gm15013	9.5279e-05	0.000496509	6.24817	0.928522	-1.15181	4.22904
Gm15204	0.000468681	0.0011481	5.09316	0.855793	-0.422698	2.42585
Gm15267	0.000874603	0.00167072	4.67465	1.20301	-0.523737	3.30981
Gm15285	0.000856377	0.00164858	4.68851	1.58462	0.149716	2.70364
Gm15309	0.000111115	0.000531934	6.13064	1.7808	-0.234732	4.04331
Gm15421	0.00161282	0.00247519	4.27944	5.49771	3.73465	3.39419
Gm15427	0.000149674	0.000620779	5.90683	7.82835	6.06427	3.39657
Gm15428	0.00117811	0.00201335	4.4805	3.36756	2.00283	2.57529
Gm15429	0.00477134	0.00520113	3.60959	2.45419	1.34016	2.16449
Gm15452	0.00543621	0.00572333	3.53117	3.2141	1.98265	2.34804
Gm15459	0.019799	0.0146577	2.76966	8.95079	7.87208	2.11214
Gm15484	9.18536e-05	0.000487632	6.27636	3.45087	1.44935	4.00421
Gm15495	0.000586887	0.00131006	4.94033	1.29166	-0.32197	3.06022
Gm15500	3.01748e-05	0.000320574	7.17404	9.79618	7.93023	3.64509
Gm15501	2.00819e-05	0.000289433	7.52339	8.65604	6.34291	4.96961
Gm15583	0.00964424	0.00858418	3.1906	2.57764	1.56152	2.02246
Gm15590	0.0399273	0.0251298	2.36038	-0.0675567	-1.22916	2.23707
Gm15596	0.00468168	0.00513201	3.62103	0.23247	-0.811268	2.06156
Gm15682	1.74012e-05	0.000275152	7.64919	1.89504	0.004804	3.70695
Gm15710	0.000294075	0.00088252	5.41743	3.63443	1.35107	4.86811
Gm15772	6.54687e-05	0.000427141	6.541	7.79602	5.4489	5.08807
Gm15784	0.00407234	0.00466574	3.70536	0.943719	-0.115953	2.08446
Gm15790	0.000516775	0.00121173	5.0265	1.98681	0.657267	2.51323
Gm15793	0.000129049	0.000573553	6.01759	0.704009	-1.27119	3.93182
Gm15832	0.000714191	0.0014781	-4.80874	0.210861	1.33775	-2.18387
Gm15899	0.0146401	0.0117066	2.94578	3.13273	2.08171	2.07198
Gm15903	2.61579e-08	4.08974e-05	-15.4592	0.166709	1.84063	-3.19082
Gm15920	8.27088e-05	0.000461473	6.35757	3.90087	1.93746	3.89981
Gm15922	0.0916904	0.0482673	1.86545	-1.46728	-5.45398	15.8531
Gm15987	0.0109918	0.00945326	-3.11367	-1.4985	0.871531	-5.16954
Gm16089	0.0161855	0.0126024	2.88717	2.52557	1.24274	2.43317
Gm16286	0.00100376	0.00182416	4.58445	5.72648	4.68374	2.06013
Gm16373	0.00240968	0.00323244	4.02737	0.812246	-0.921346	3.32555
Gm16374	9.5322e-05	0.000496509	6.24782	1.95628	0.379852	2.9823
Gm16379	0.000480413	0.00116682	5.07625	1.41635	-1.98301	10.5514
Gm16380	0.000786465	0.00156382	4.74473	1.35448	-0.812698	4.49144
Gm16425	0.00114742	0.00198307	4.49756	2.20346	-0.369693	5.9511
Gm16433	0.00033425	0.000940572	5.32729	4.1103	2.97773	2.19249
Gm16477	2.32941e-05	0.000305558	7.3947	2.32014	-0.052406	5.17852
Gm16523	3.05861e-05	0.000322353	-7.16263	0.837622	2.84427	-4.01849
Gm16534	0.000131596	0.000577639	-6.00292	0.661504	4.06597	-10.5888
Gm16580	0.00062663	0.00136279	4.89622	5.04292	3.36336	3.2033
Gm16638	0.000260646	0.00082561	-5.50312	0.799383	2.30642	-2.84225
Gm16845	0.0035525	0.00422487	3.78843	0.801942	-0.56638	2.5817
Gm17018	0.0016651	0.00253583	4.25921	2.36164	1.02487	2.52584
Gm17052	0.000404271	0.00105678	5.19489	1.14568	-0.89063	4.10196
Gm17060	1.78839e-05	0.000275421	7.62505	0.636485	-1.39998	4.1024
Gm17241	0.00255368	0.00337545	3.99136	1.40036	-0.199814	3.03179
Gm17251	0.0021282	0.00296599	4.10479	0.671296	-0.673783	2.54044
Gm17322	0.0570407	0.0333794	-2.15025	-0.0706422	1.40541	-2.78186
Gm17435	0.0416626	0.025967	-2.33543	0.868884	1.95902	-2.12894
Gm17494	3.95078e-05	0.000352334	6.94924	0.831705	-0.624627	2.7441
Gm17709	0.000449575	0.00112559	5.1217	1.7269	-0.801864	5.77077
Gm17828	0.000148056	0.000617936	5.91491	1.26888	-1.0981	5.15859
Gm17849	0.00292942	0.00371375	-3.9066	-0.755373	1.66058	-5.33671
Gm17873	0.00294852	0.00372748	3.9026	0.980866	-0.160716	2.20623
Gm18025	3.10298e-06	0.000192705	9.29187	0.611027	-2.37303	7.91207
Gm1821	5.98878e-05	0.000410266	6.61181	6.88825	5.32572	2.95372
Gm1840	0.000340843	0.00095238	5.31361	5.50279	3.75383	3.36116
Gm18432	0.00119454	0.00202746	4.47156	0.997473	-0.31868	2.49001
Gm1848	0.00111097	0.00194565	4.51847	2.4257	1.20007	2.33857
Gm18541	5.10818e-05	0.00038557	6.73949	1.57676	0.103771	2.77597
Gm1866	0.00144332	0.00229347	4.35011	1.24402	-0.42316	3.17593
Gm18852	0.000375264	0.00100407	-5.24652	-0.814601	2.10575	-7.57028
Gm18860	0.0109249	0.00940995	3.11726	2.4037	1.31391	2.12842
Gm18913	0.00111404	0.00194827	4.51668	2.30055	1.11397	2.27613
Gm18990	2.56053e-05	0.000307367	-7.31349	0.322348	1.7724	-2.73218
Gm19040	0.00248004	0.00329898	-4.0095	-0.218715	1.1305	-2.54773
Gm19325	0.00294085	0.0037237	-3.9042	0.738594	1.7576	-2.02652
Gm19327	0.000657269	0.00140708	-4.86421	-0.00676263	2.03109	-4.10635
Gm19605	0.000520054	0.00121478	-5.0222	1.13875	2.67572	-2.90185
Gm1966	0.00655097	0.00652361	-3.41968	0.37134	4.42369	-16.5912
Gm19680	0.00181175	0.00267212	4.20587	2.65973	1.29991	2.56652
Gm19721	6.36569e-05	0.000424123	-6.56325	1.06279	3.17612	-4.32688
Gm19810	0.000153717	0.000626429	5.88705	3.90842	2.16739	3.34274
Gm19967	0.00187294	0.00273395	-4.18494	-0.552372	1.01816	-2.97013
Gm2000	5.85035e-05	0.00040751	6.63049	7.96853	5.78434	4.54474
Gm20045	9.06485e-05	0.000483906	-6.28655	1.41346	2.99279	-2.98831
Gm20056	0.000796351	0.00157657	4.73647	1.89456	0.615084	2.42751
Gm20075	0.000557045	0.0012662	4.97559	4.94674	3.60521	2.53421
Gm20342	1.96403e-05	0.000289028	-7.54281	3.88012	5.13548	-2.38726
Gm20390	2.82518e-05	0.000312297	7.22973	4.09794	1.5942	5.67152
Gm20431	0.000314916	0.000909351	5.36913	1.01733	-4.2122	37.5184
Gm20517	0.00679196	0.00668357	-3.39817	0.0264831	1.17977	-2.2242
Gm20518	0.000169702	0.000654263	-5.81397	-0.575828	1.09677	-3.18787
Gm20594	0.000306091	0.000900889	5.38915	10.3824	8.78058	3.03535
Gm20604	0.0003285	0.000928996	5.33946	2.81212	1.6573	2.22657
Gm20682	8.28086e-05	0.000461473	-6.35663	-0.580242	1.83031	-5.31679
Gm20683	0.00072901	0.00149695	-4.79507	0.834323	2.28446	-2.73233
Gm20696	2.41473e-05	0.000305558	-7.36375	2.05208	4.47406	-5.35905
Gm20705	0.000830082	0.00161814	-4.70906	-0.129276	2.25069	-5.20526
Gm21399	5.11413e-05	0.00038557	6.73855	4.50961	2.70812	3.48581
Gm21596	0.00251611	0.00333801	4.00055	5.34619	4.28174	2.09137
Gm21781	0.00110356	0.00193762	-4.5228	3.83369	5.39957	-2.96056
Gm21982	0.00343322	0.00413506	3.80928	2.21099	1.12231	2.12679
Gm21985	0.0568087	0.0332822	-2.15266	-3.50169	-0.958522	-5.82867
Gm21994	0.0166556	0.0128701	2.87046	1.42498	0.186945	2.35878
Gm22068	0.00737671	0.00706439	3.34908	6.55205	5.12949	2.68062
Gm2223	0.000888734	0.00168556	4.66411	6.03023	4.6372	2.6263
Gm2225	7.10908e-05	0.000438398	6.47596	6.17772	4.24796	3.80992
Gm22317	0.00908093	0.00820781	3.22609	6.56925	5.16136	2.6535
Gm22442	0.00107618	0.00190214	-4.53911	-2.44833	1.69133	-17.6264
Gm22486	0.0125831	0.0104683	3.03436	2.71175	1.21486	2.82235
Gm22513	0.000899626	0.00169808	4.65611	7.00479	-1.14214	283.445
Gm2260	0.00106075	0.00188493	4.54849	1.61839	-1.31594	7.64405
Gm22634	0.00689323	0.00674774	3.38936	6.60091	5.15468	2.72495
Gm23238	0.00794283	0.00743626	3.30525	6.53226	5.10002	2.69866
Gm23444	0.00829177	0.0076815	3.2798	4.0122	2.33246	3.2037
Gm23472	0.00476391	0.00519588	3.61053	4.37386	2.74069	3.10193
Gm23804	0.024019	0.0169452	2.65709	9.43493	8.19785	2.3572
Gm23849	0.0137344	0.0111598	2.98311	7.8457	6.51616	2.51322
Gm2395	0.00292537	0.00371001	3.90745	1.2136	0.00628075	2.30908
Gm24119	0.0357277	0.0230901	2.42544	4.40742	3.03563	2.58791
Gm2423	0.00185904	0.00271965	4.18963	3.74721	2.27213	2.78
Gm24305	0.0103749	0.00906799	3.14762	7.51439	6.08912	2.68565
Gm24407	0.0842951	0.0452489	1.9165	4.7685	3.75585	2.01762
Gm2445	0.000201198	0.000714044	5.68948	1.37091	-0.264274	3.10628
Gm2446	0.0013914	0.00224193	4.37353	0.523572	-0.818534	2.53521
Gm24497	0.0252741	0.0176365	2.62741	7.36738	5.94212	2.68562
Gm2451	0.000288682	0.000873903	5.43052	3.53912	1.87965	3.15901
Gm24616	0.00441568	0.00494225	3.65635	1.68334	0.0540188	3.09367
Gm24924	0.00827512	0.00766966	3.28099	6.5622	5.15747	2.64769
Gm24950	0.0236964	0.0167892	2.66497	9.32687	8.06846	2.39233
Gm25360	0.0108451	0.00935543	3.12156	4.32248	2.22875	4.2685
Gm25679	0.00779221	0.00733327	3.31659	6.56764	5.1625	2.64843
Gm2573	0.000363367	0.00098016	5.26893	0.698292	-0.50689	2.30566
Gm2574	4.86622e-05	0.000378625	6.77877	3.59244	1.94693	3.1286
Gm25939	0.0720069	0.0400039	2.01139	6.07149	4.90652	2.24229
Gm2606	9.25522e-05	0.000489668	6.27052	4.208	2.34864	3.62846
Gm26130	0.00494572	0.0053437	3.58797	2.85666	-0.0709808	7.60863
Gm2614	6.60099e-05	0.000429262	6.53448	5.30729	3.4629	3.59101
Gm26232	0.018111	0.0137147	2.8216	8.44543	6.43091	4.04047
Gm26244	0.00687911	0.00673891	3.39058	6.57206	5.14599	2.68715
Gm26316	0.00138153	0.00223693	4.37808	1.37524	-0.774956	4.43887
Gm26444	0.00700049	0.00680918	3.38018	6.55401	5.13534	2.67338
Gm26493	0.000378496	0.00100932	5.24055	1.74982	-0.695773	5.44748
Gm26514	5.82961e-05	0.00040751	-6.63332	1.28633	2.96651	-3.20467
Gm26551	0.000487998	0.00117301	-5.06555	3.1981	6.34006	-8.82719
Gm26601	0.0571744	0.0334324	-2.14886	-1.00578	1.10256	-4.31194
Gm26621	0.038211	0.0242464	-2.38612	1.51828	2.7968	-2.4259
Gm26624	0.000782811	0.00156072	-4.74782	-0.941376	2.20609	-8.86099
Gm26740	0.00228367	0.00311173	-4.06079	0.54002	3.76276	-9.33558
Gm26870	3.05934e-05	0.000322353	7.16243	9.76635	1.66907	273.857
Gm26890	0.00247127	0.00329344	-4.0117	0.882651	2.20708	-2.50433
Gm26930	1.21732e-05	0.000260043	-7.96967	3.3193	6.28272	-7.7997
Gm27219	0.00276744	0.00356664	3.94166	3.69928	2.54513	2.22553
Gm28042	0.0502492	0.0301524	-2.22521	0.199416	1.32301	-2.17889
Gm28151	0.00225209	0.00308349	-4.06947	-0.0702625	1.43071	-2.83034
Gm28373	0.0179086	0.0136159	-2.82815	0.940979	1.97011	-2.0408
Gm28437	0.00176684	0.00263029	4.22171	11.7713	10.6763	2.13606
Gm28438	0.0006934	0.00144777	4.82844	8.54945	7.26015	2.44409
Gm28661	0.00012823	0.000571188	6.02237	10.8678	9.7622	2.1519
Gm28693	0.00288906	0.00367989	-3.91514	0.745336	2.37242	-3.08888
Gm28791	1.1976e-05	0.000257752	-7.98455	0.510451	1.85268	-2.53544
Gm28875	0.000247377	0.000798467	-5.54045	0.0726177	2.11571	-4.12129
Gm28900	2.62778e-05	0.000307996	7.29135	0.469574	-2.00028	5.53988
Gm29036	0.00169128	0.00256099	-4.24934	-0.0150925	1.04374	-2.08324
Gm29216	0.00189541	0.00275573	4.17744	11.0078	9.99033	2.02437
Gm29257	4.4412e-05	0.000360048	6.85317	0.777572	-1.1698	3.8567
Gm29488	0.00348643	0.00416874	-3.79989	0.911699	1.92522	-2.01883
Gm2962	0.0123691	0.0103175	3.04441	2.12734	0.813978	2.4852
Gm29718	0.0348622	0.0226475	2.43978	-0.267416	-1.98285	3.28397
Gm2986	0.00401294	0.00461765	3.71427	1.5203	-0.19824	3.29103
Gm2991	0.00014902	0.000619359	5.91008	1.92913	-0.041803	3.92022
Gm2996	0.00107186	0.0018982	4.54172	1.81731	-0.334332	4.44333
Gm2a	0.00739307	0.00707493	3.34777	4.22949	3.00356	2.33906
Gm3081	0.000287732	0.000873903	-5.43286	1.48793	2.87792	-2.62077
Gm31718	0.00539763	0.00568875	-3.53544	-4.21768	-2.64448	-2.97565
Gm3219	3.5504e-05	0.000336681	7.03778	2.612	0.535479	4.21788
Gm3222	0.00069729	0.00145513	4.82471	1.51865	-0.271241	3.45788
Gm32220	0.0101735	0.00892732	-3.15915	-4.6479	-2.56939	-4.2237
Gm3226	0.0031136	0.00386968	3.86912	5.23808	3.64859	3.00943
Gm3272	0.000204149	0.000717857	5.67891	3.53495	1.83177	3.25616
Gm33378	0.000192596	0.000695681	-5.72128	0.12202	1.59092	-2.76812
Gm336	0.00933283	0.00838021	-3.20995	1.25265	3.32135	-4.19507
Gm3362	1.55865e-05	0.000269263	7.74693	3.0721	1.15285	3.78227
Gm3375	0.00277001	0.00356724	3.94108	3.89013	2.22944	3.16169
Gm3379	0.00316505	0.0039177	3.85907	1.14326	-0.567248	3.27277
Gm34220	0.00110781	0.00194336	-4.52031	1.29444	2.80458	-2.84838
Gm3436	0.000143887	0.000609156	5.93617	3.18297	1.30721	3.66994
Gm35013	0.00194468	0.00280466	4.16131	0.938639	-0.220771	2.23366
Gm3531	2.00208e-05	0.000289433	7.52605	6.31522	4.48248	3.56213
Gm35339	0.0029899	0.00376183	-3.89403	0.560418	2.16897	-3.04944
Gm3534	0.000290103	0.000873903	5.42705	2.16257	0.491755	3.18394
Gm3550	9.19219e-05	0.000487632	6.27579	2.43259	0.436158	3.99012
Gm36445	0.0124388	0.0103613	-3.04112	0.204533	2.91148	-6.52937
Gm36527	3.33571e-05	0.000329699	-7.08982	1.67945	2.85448	-2.25799
Gm36638	1.25445e-05	0.000261606	-7.94233	0.600901	2.71812	-4.33855
Gm36931	3.2531e-05	0.000326405	-7.11082	4.92073	8.08539	-8.9672
Gm36932	2.08973e-06	0.000159677	-9.7052	-0.163234	2.20906	-5.17763
Gm36933	0.000141845	0.000603423	-5.94682	1.27818	4.68842	-10.6313
Gm36940	0.0126521	0.0105107	-3.03116	0.0686613	1.30534	-2.35655
Gm36948	0.00856704	0.007865	-3.26049	2.20528	3.28516	-2.11386
Gm37010	0.000279384	0.000858534	-5.45373	-1.32685	1.13482	-5.50855
Gm37019	0.000248301	0.000799794	-5.53778	-0.91435	0.925528	-3.5798
Gm37033	8.66992e-05	0.000471762	-6.321	2.37172	5.97912	-12.1881
Gm37042	0.000222011	0.000751384	5.6182	0.122668	-4.0832	18.4541
Gm37052	0.000161357	0.000639207	-5.85115	1.10874	2.21653	-2.15516
Gm37065	0.000434159	0.00110227	-5.14569	2.25007	3.54436	-2.45257
Gm37082	0.000234358	0.000775341	-5.57923	1.57158	3.51586	-3.84843
Gm37084	0.0226123	0.0162294	-2.69225	1.66334	2.84257	-2.26456
Gm37094	0.0705959	0.039341	-2.02325	0.168133	1.70137	-2.89434
Gm37101	0.000775603	0.00155251	-4.75394	0.707233	1.98757	-2.42896
Gm37105	0.00485755	0.00527629	-3.5988	0.93971	2.3304	-2.62205
Gm37108	5.81656e-05	0.00040751	6.63511	3.36463	1.32145	4.12155
Gm37115	0.00209344	0.00293401	-4.11509	1.12964	2.24365	-2.16446
Gm37123	0.000677381	0.00142871	-4.84405	1.04465	2.0854	-2.05731
Gm37124	2.41439e-05	0.000305558	-7.36386	2.53461	5.53208	-7.98602
Gm37139	0.00291357	0.00370106	-3.90994	1.19885	2.60711	-2.65417
Gm37159	0.00140456	0.00225578	-4.36751	0.0883459	2.38282	-4.90574
Gm37164	0.00765596	0.00724624	3.32704	1.5869	0.333197	2.38452
Gm37176	9.92046e-05	0.000507266	-6.21717	2.13433	4.51738	-5.21637
Gm37183	0.0017533	0.00261699	-4.22657	0.488883	1.74436	-2.38746
Gm37186	0.000391403	0.00103678	-5.21729	1.20426	3.32205	-4.34028
Gm37204	0.000597185	0.00132338	-4.9286	1.55764	3.61603	-4.1652
Gm37206	0.000429215	0.00109182	-5.15357	3.23585	4.60088	-2.57583
Gm37212	0.000825141	0.00161346	-4.713	-1.98382	1.36546	-10.1914
Gm37216	0.000156779	0.000632324	-5.87244	-0.499975	1.22655	-3.3093
Gm37233	0.0303863	0.020391	-2.52002	0.608005	4.34199	-13.3058
Gm37248	1.55352e-05	0.000269263	-7.74987	4.1332	7.565	-10.7913
Gm37255	0.000392543	0.00103819	-5.21527	0.510572	2.06532	-2.93781
Gm37262	0.000809795	0.00159391	-4.7254	0.895934	2.42561	-2.88721
Gm37266	2.12333e-05	0.000291928	-7.47485	2.19678	4.64831	-5.46994
Gm37274	8.4705e-05	0.000464864	-6.33904	1.59739	3.54947	-3.86935
Gm37285	4.38232e-05	0.000359155	-6.86408	1.15734	2.72581	-2.96589
Gm37296	0.0299499	0.0201765	-2.52846	2.3567	3.42865	-2.10227
Gm37298	8.40929e-06	0.000233657	-8.31198	5.11485	7.8624	-6.71576
Gm37303	0.000132158	0.000578314	-5.99972	1.04448	2.82028	-3.42427
Gm37320	0.055109	0.0324876	-2.17065	0.77677	2.06164	-2.43659
Gm37321	0.000585946	0.00130924	-4.94141	-0.0333289	1.46303	-2.8213
Gm37334	0.000220417	0.000747994	-5.6234	-2.59553	-0.110844	-5.5971
Gm37370	0.000777684	0.00155544	-4.75217	0.418881	1.79644	-2.59828
Gm37382	0.00858151	0.00787409	-3.25949	-0.425036	1.94299	-5.16234
Gm37390	0.000136803	0.00059019	-5.97385	-0.67655	2.85063	-11.5289
Gm37409	0.000525153	0.00122264	-5.01557	-0.056688	1.80132	-3.62507
Gm37420	0.0120957	0.0101585	-3.05751	3.25408	4.50059	-2.37267
Gm37423	3.36741e-05	0.000330536	-7.08191	1.23982	2.73173	-2.8126
Gm37436	0.000501697	0.00119059	-5.04666	-0.62623	1.11374	-3.34029
Gm37470	7.48954e-05	0.000444628	-6.43502	0.998117	2.07496	-2.10942
Gm37474	0.000318308	0.000913172	-5.36159	1.43596	3.36295	-3.8026
Gm37486	0.00105563	0.00187667	4.55164	3.74438	2.39749	2.54364
Gm37488	1.53205e-05	0.000266989	-7.76229	3.32838	4.50604	-2.2621
Gm37494	0.00596597	0.00613636	-3.4755	3.84954	4.91074	-2.08667
Gm37499	0.000101282	0.0005094	-6.2013	0.527388	1.70864	-2.26773
Gm37509	0.00266448	0.0034711	-3.96508	-0.184909	1.39834	-2.99645
Gm37510	0.000344221	0.000958449	-5.30671	1.3579	3.68068	-5.00292
Gm37522	5.26611e-05	0.000393584	-6.71492	1.07214	2.44264	-2.5856
Gm37529	0.000105124	0.000518873	-6.17284	-2.24755	0.99455	-9.46172
Gm37531	0.0548652	0.0323571	-2.17328	0.299344	1.63433	-2.52273
Gm37534	2.97921e-06	0.000190926	-9.33375	5.49252	8.30154	-7.00806
Gm37553	0.00125535	0.00208525	-4.43956	1.09796	2.74139	-3.12407
Gm37558	6.81129e-05	0.00043417	-6.50969	2.81634	3.86796	-2.07286
Gm3756	0.00374693	0.00438729	3.75596	1.90846	0.490504	2.67207
Gm37570	0.00102991	0.00185197	-4.56769	1.0204	2.73212	-3.2755
Gm37581	0.000147149	0.000615442	-5.91948	-0.0397453	1.60651	-3.13019
Gm37584	0.000592566	0.00131669	-4.93383	0.548171	1.89665	-2.54644
Gm37588	0.000771922	0.00154819	-4.7571	0.502422	1.66244	-2.23459
Gm37589	4.37057e-05	0.000359155	-6.86628	3.77215	5.74005	-3.91199
Gm37593	9.18153e-06	0.000236892	-8.22968	2.94236	5.50839	-5.92175
Gm37621	2.61472e-05	0.000307631	-7.2956	-0.00214941	2.98779	-7.94438
Gm37632	1.58487e-05	0.000271432	-7.73206	0.799572	3.59103	-6.92327
Gm37645	0.000132784	0.000579211	-5.99618	0.0109805	2.17137	-4.47036
Gm37653	1.74087e-06	0.000150959	-9.9012	2.26954	3.51111	-2.36457
Gm37663	0.000110618	0.000531576	-6.13405	3.27344	4.47735	-2.30363
Gm37677	0.000267795	0.000838233	-5.48384	1.79273	3.75288	-3.89101
Gm37691	0.00345556	0.00414562	-3.80532	-0.743235	1.1884	-3.81488
Gm37702	0.00469331	0.00514004	-3.61953	-0.156155	1.40638	-2.95372
Gm37706	0.00222591	0.00306394	-4.07676	-1.4398	1.6159	-8.31487
Gm37718	0.000577536	0.0012994	-4.95116	0.386769	1.66823	-2.43085
Gm37726	0.000481313	0.00116682	-5.07497	1.25905	3.00932	-3.3642
Gm37738	0.000480768	0.00116682	-5.07575	1.62762	3.41685	-3.4563
Gm37747	0.00637853	0.0064081	-3.43558	0.824963	2.3522	-2.88234
Gm37766	8.27994e-05	0.000461473	-6.35672	0.293285	2.68603	-5.25155
Gm37795	0.0442871	0.0272691	-2.29957	-1.37656	-0.0553357	-2.49879
Gm37802	0.00444912	0.00496429	-3.65179	1.17607	2.60856	-2.69913
Gm37809	0.000112927	0.000538004	-6.11836	-0.176596	0.947477	-2.17961
Gm37864	8.94879e-06	0.000235474	-8.25367	0.0511279	2.18607	-4.3922
Gm37868	0.00127024	0.00210294	-4.43197	0.184275	1.50188	-2.49252
Gm3788	0.000158759	0.000636521	5.86315	2.05654	0.335025	3.29781
Gm37893	0.000107774	0.000524781	-6.15386	0.97672	2.3704	-2.62749
Gm37906	3.84855e-05	0.000350123	-6.97089	1.80852	3.15086	-2.53561
Gm37940	0.00105281	0.00187502	-4.55338	0.548638	2.32293	-3.42069
Gm37943	0.00628792	0.00635079	-3.44411	1.54179	2.74713	-2.30592
Gm37968	1.65408e-05	0.00027256	-7.69408	-0.568082	0.693354	-2.39734
Gm37975	0.000325505	0.000923815	-5.34589	-0.581602	2.00559	-6.0093
Gm37978	0.0121264	0.0101782	-3.05603	0.69069	1.94814	-2.39072
Gm37983	7.63815e-05	0.000452294	-6.41964	1.4033	3.16579	-3.39284
Gm38014	0.00102595	0.00184789	-4.57019	-0.188626	1.39934	-3.00626
Gm38020	0.00319035	0.00393796	-3.85419	2.04228	3.08373	-2.05829
Gm38034	0.000761219	0.0015361	-4.76636	1.24954	2.82197	-2.97405
Gm38043	0.0018957	0.00275573	-4.17734	0.880421	2.83093	-3.8651
Gm38056	0.00367697	0.00433784	-3.76744	1.89938	3.98597	-4.24743
Gm38062	2.33134e-05	0.000305558	-7.39399	0.743321	3.0379	-4.9061
Gm38082	0.000980815	0.00180481	-4.59954	3.12131	5.50359	-5.21358
Gm38115	0.0171582	0.0131689	-2.85312	1.35238	2.60417	-2.38136
Gm38120	0.000158917	0.000636521	-5.86242	1.68594	3.69001	-4.01131
Gm38147	0.00184727	0.00270842	-4.19363	0.0640505	1.63101	-2.9628
Gm38190	0.0104498	0.0091194	-3.14339	1.68079	2.77232	-2.131
Gm38236	0.00111379	0.00194827	-4.51682	-0.416475	1.61467	-4.0873
Gm38257	0.00274874	0.00354715	-3.94584	1.26304	2.37692	-2.16427
Gm38292	0.00167643	0.00254552	-4.25492	0.472166	2.4307	-3.88666
Gm38336	0.00144051	0.00229129	-4.35136	0.68202	2.12355	-2.71608
Gm38346	0.000109716	0.000529053	-6.14027	1.72909	3.68771	-3.88691
Gm38357	0.00498156	0.00537208	-3.58363	0.133134	1.8067	-3.19002
Gm38365	8.23543e-05	0.000461473	-6.36091	1.02973	4.02134	-7.95362
Gm38372	0.000826782	0.0016157	-4.71169	2.38953	3.68545	-2.45533
Gm38374	0.000270467	0.000842758	-5.47677	0.647784	2.23922	-3.0135
Gm38375	3.33397e-06	0.000192705	-9.21837	1.23456	2.89801	-3.16773
Gm38377	0.00337552	0.0040878	-3.81964	1.09503	3.04962	-3.87605
Gm38380	4.39096e-05	0.000359155	-6.86247	0.724329	2.55207	-3.54981
Gm38387	0.000215079	0.000741825	-5.64111	1.51002	3.44054	-3.81192
Gm3839	7.23182e-05	0.000440037	6.4625	2.66707	0.672696	3.98444
Gm39041	0.000607045	0.00134	-4.91757	0.430028	2.33901	-3.75544
Gm40309	0.000275852	0.000849653	-5.46276	0.891533	2.69867	-3.49946
Gm4070	0.0119999	0.0101016	-3.06217	2.51457	4.44657	-3.81585
Gm4076	7.74396e-05	0.00045415	6.40888	6.61509	5.24427	2.58618
Gm4130	0.00164081	0.00250653	4.26853	4.18266	3.16185	2.02905
Gm4149	8.38267e-05	0.000462338	6.34713	6.61802	4.69374	3.79547
Gm4202	0.00106685	0.00189408	4.54477	6.2687	5.19618	2.1031
Gm4204	1.24378e-05	0.000261606	7.9501	7.09465	5.27101	3.53973
Gm42047	0.0270053	0.0185706	-2.58881	0.992375	4.03743	-8.25375
Gm42141	0.00035401	0.000972752	-5.28713	0.674117	2.75553	-4.23222
Gm42372	0.0064453	0.00645234	-3.42937	0.694262	2.23061	-2.90059
Gm42462	0.00583501	0.00604326	3.48877	1.30371	0.182573	2.17519
Gm42514	0.00498225	0.00537208	-3.58355	-1.18674	0.140407	-2.50905
Gm42515	5.28489e-05	0.000393584	-6.71205	0.396914	1.65577	-2.39306
Gm42548	0.0173122	0.0132462	-2.8479	1.5741	2.95671	-2.60739
Gm42549	0.0130317	0.0107359	-3.01385	2.30997	3.67885	-2.58271
Gm42559	0.000169242	0.000654263	-5.81597	0.621297	2.34197	-3.29591
Gm42571	0.00243702	0.0032581	-4.02037	0.456345	2.35287	-3.72315
Gm42576	8.17189e-05	0.000461473	-6.36693	1.00372	2.90794	-3.74307
Gm4258	2.29146e-05	0.000305558	-7.40887	3.66147	5.92733	-4.80943
Gm42611	0.00200746	0.0028564	-4.14137	1.12315	2.98338	-3.63065
Gm42658	0.000232573	0.00077136	-5.58473	-0.0302558	1.49952	-2.8874
Gm42659	0.000191223	0.000693241	-5.7265	1.0914	2.31164	-2.32987
Gm42701	0.00122357	0.00204873	-4.45607	-0.289147	1.84969	-4.40408
Gm42702	0.000804864	0.00158788	-4.72944	0.226707	2.54854	-4.99968
Gm42728	0.0159528	0.0124726	-2.89562	0.0755978	1.33765	-2.39836
Gm42743	0.0143205	0.0115089	2.95868	6.93916	5.79799	2.2056
Gm42819	0.000533126	0.001233	-5.00533	-0.261133	1.72412	-3.95933
Gm42820	0.000980146	0.00180481	-4.59998	-0.649577	0.600932	-2.37925
Gm42856	0.00014487	0.000611707	-5.93109	1.27089	2.64413	-2.59051
Gm42866	0.00558661	0.00584452	-3.51481	-0.349774	1.59545	-3.85096
Gm42869	6.87076e-05	0.00043417	-6.50283	1.24301	2.65359	-2.65845
Gm42878	0.0506395	0.0303206	-2.22064	-0.129148	0.948061	-2.10995
Gm42907	0.000317974	0.000913085	-5.36233	0.703293	1.79974	-2.13828
Gm42908	0.00414389	0.00472727	-3.6948	-1.02025	0.129587	-2.21889
Gm42930	0.00192246	0.0027807	-4.16853	0.22308	1.52786	-2.47045
Gm4294	0.000495289	0.00118195	5.05543	6.38256	4.35704	4.0714
Gm42979	0.00139142	0.00224193	-4.37352	1.03112	2.5701	-2.90589
Gm42986	0.000670865	0.00142315	-4.85051	1.17518	2.77616	-3.03349
Gm43009	0.00459551	0.00507067	-3.63224	0.040478	1.89801	-3.62387
Gm43010	0.00217921	0.00301592	-4.08999	0.686306	2.46457	-3.43012
Gm43011	9.86156e-05	0.000506898	-6.22174	1.55245	3.12044	-2.96491
Gm43024	7.98288e-05	0.000460329	-6.38516	0.327826	2.081	-3.37099
Gm43028	8.10112e-05	0.000461473	6.3737	1.87499	-0.402102	4.847
Gm43039	0.000457293	0.0011308	-5.11002	-0.201135	1.11337	-2.48717
Gm43051	0.00111022	0.00194565	-4.51891	0.442682	2.43182	-3.97
Gm43052	0.00103535	0.00185557	-4.56426	-0.0378961	2.41882	-5.48965
Gm43059	4.91495e-05	0.00038142	-6.77069	-0.38602	1.43902	-3.54317
Gm43061	0.00838619	0.00774729	-3.2731	0.356968	1.76104	-2.64647
Gm43071	0.0198341	0.0146755	-2.76862	0.493118	1.62626	-2.19335
Gm43079	0.000325409	0.000923815	5.34609	0.627577	-0.505347	2.19303
Gm43080	0.000565178	0.00127593	-4.96578	-0.522108	1.44084	-3.89859
Gm43096	0.00104784	0.00187035	4.55646	2.57516	1.51684	2.0825
Gm43110	0.000577899	0.00129948	4.95074	0.796955	-0.485533	2.43258
Gm43149	0.00449971	0.00499828	-3.64496	0.409715	1.90651	-2.82215
Gm43162	0.000742426	0.00151432	-4.78295	-0.800462	1.39352	-4.57568
Gm43176	0.000686147	0.00143943	-4.83546	0.336981	1.53215	-2.28972
Gm43178	0.0250073	0.0174933	-2.6336	0.339747	1.37666	-2.05183
Gm43195	4.17207e-05	0.000358448	-6.90438	-0.785632	3.64709	-21.5965
Gm43200	0.00301328	0.00378086	-3.88924	0.845694	1.93987	-2.13491
Gm43213	0.0275939	0.0189001	-2.57624	0.957361	2.15385	-2.29181
Gm43256	0.000203981	0.000717857	-5.6795	1.13443	3.50306	-5.1645
Gm43260	0.00120619	0.00203507	-4.46529	0.584685	2.88658	-4.93105
Gm43274	0.00164863	0.00251552	-4.26551	1.13366	3.61095	-5.56852
Gm43275	0.000557036	0.0012662	-4.9756	-0.953552	1.98241	-7.65269
Gm43290	0.000136468	0.000589384	-5.97568	-1.60034	0.300044	-3.73311
Gm43302	0.0872032	0.0464504	-1.89595	-1.24238	2.61267	-14.4706
Gm43313	0.0145003	0.0116162	-2.95138	1.69675	2.70951	-2.01777
Gm4332	0.000118496	0.000551962	6.08189	7.6734	5.79148	3.68565
Gm43328	0.000186933	0.000687091	-5.74307	2.00854	3.03992	-2.04398
Gm43329	0.000309006	0.000902798	-5.38247	1.58852	3.57724	-3.96886
Gm43330	0.000670548	0.00142315	-4.85082	1.55119	3.40041	-3.60307
Gm43331	0.000223101	0.000753219	-5.61467	1.06174	2.91786	-3.62033
Gm43339	0.0073523	0.0070461	-3.35105	0.423361	1.67561	-2.38213
Gm43365	0.000364405	0.000982294	-5.26695	0.599304	1.85287	-2.38431
Gm43387	0.00265094	0.00345712	-3.96823	-0.735404	1.19202	-3.80376
Gm43421	0.000464667	0.00114038	-5.09906	1.95833	3.53361	-2.97992
Gm43430	0.00160066	0.0024643	-4.28424	1.09643	2.81249	-3.28538
Gm43442	0.0364639	0.0234211	2.41351	1.88822	0.864658	2.03293
Gm43457	1.32404e-06	0.000148567	-10.2011	0.998345	2.46491	-2.76363
Gm43462	6.89466e-05	0.00043417	-6.50009	1.97052	3.37828	-2.65326
Gm43463	3.96734e-05	0.000352334	-6.94579	-0.270866	1.52222	-3.46554
Gm43466	6.47327e-06	0.00022642	-8.56087	1.19751	2.78947	-3.01459
Gm43481	0.00449064	0.00499485	-3.64617	2.10492	3.49575	-2.62228
Gm43482	0.00204888	0.00289403	-4.12856	-0.137779	1.49483	-3.10073
Gm43499	0.0692935	0.0387565	-2.0344	-1.75592	-0.385893	-2.58475
Gm43524	0.000189059	0.000689676	5.73481	1.36022	-0.90636	4.81182
Gm43544	0.000520688	0.00121484	-5.02137	0.569839	1.84527	-2.42071
Gm43571	0.00388582	0.00450911	-3.73382	0.90535	2.49254	-3.00465
Gm43584	0.0112954	0.00964134	3.09767	1.31934	-0.105788	2.68539
Gm43633	0.000606216	0.00133891	-4.91849	-0.355079	1.88623	-4.72826
Gm43654	0.042609	0.0264572	-2.32225	1.01342	2.05994	-2.06554
Gm4366	0.000246429	0.000797347	5.5432	7.67319	5.74179	3.81424
Gm43696	0.0106172	0.00921686	-3.13404	0.941268	2.17187	-2.34665
Gm43702	7.72666e-06	0.000229745	-8.39189	-0.487108	3.73541	-18.6683
Gm43707	9.73405e-05	0.000503602	-6.23172	-0.288049	2.59509	-7.37752
Gm43712	2.93227e-05	0.0003166	7.19823	4.50617	2.51926	3.96386
Gm4374	0.00818964	0.00761066	3.28713	1.2645	-0.037973	2.46651
Gm43747	0.0126715	0.0105198	-3.03026	1.00829	2.05681	-2.06841
Gm43753	0.00625893	0.00632956	-3.44687	0.520495	2.93634	-5.33633
Gm43769	0.000230115	0.000768009	-5.59237	-0.484387	1.64149	-4.36468
Gm43788	0.000413842	0.00106983	-5.17872	1.51402	3.74701	-4.70108
Gm43807	0.00198512	0.00284407	-4.14838	0.569583	1.67849	-2.15681
Gm43813	0.000509192	0.00120071	-5.03656	1.73669	3.02926	-2.44965
Gm43848	0.00467687	0.00513149	-3.62165	0.72412	1.9449	-2.33072
Gm43857	0.00188082	0.00274143	-4.1823	-0.00864585	1.51361	-2.87239
Gm43858	0.000801546	0.00158414	-4.73217	0.244524	1.96957	-3.30591
Gm43982	0.0265925	0.0183558	-2.59778	0.751034	2.29815	-2.92232
Gm43984	0.0140821	0.0113564	-2.96849	0.855014	2.60855	-3.37184
Gm44027	3.46488e-05	0.000334867	-7.05809	0.583938	2.65183	-4.19274
Gm44045	0.0431539	0.0267162	-2.31479	0.523642	1.8474	-2.50317
Gm44078	0.0045717	0.00505986	-3.63537	0.0654842	1.54669	-2.79182
Gm44086	0.0167669	0.0129435	-2.86658	2.0604	3.09653	-2.05072
Gm44093	0.0299733	0.0201785	-2.528	0.122061	1.30105	-2.26418
Gm44104	0.00693335	0.00676535	-3.38591	-0.33152	3.4675	-13.9194
Gm44126	0.000121545	0.000557667	6.06269	2.53919	1.05056	2.80621
Gm44130	0.000515356	0.00121093	-5.02837	1.46592	3.10566	-3.1161
Gm44152	0.00606176	0.00620157	-3.46598	0.17784	1.75746	-2.98891
Gm44153	0.000758413	0.0015347	-4.7688	0.21209	1.92822	-3.28553
Gm44187	0.000179683	0.000674164	-5.77201	0.47034	2.35182	-3.68453
Gm44283	0.000377774	0.00100807	-5.24188	0.884518	2.20709	-2.50113
Gm44291	0.0018146	0.00267434	-4.20488	0.369433	2.43415	-4.18351
Gm44292	0.000156421	0.000631618	-5.87413	-0.0426285	1.04489	-2.12508
Gm44419	0.000339141	0.000949628	5.31712	0.173197	-2.58576	6.76908
Gm44423	0.00196524	0.00281999	-4.1547	-0.0397535	1.64075	-3.20539
Gm44434	0.000127742	0.000569731	-6.02524	1.96469	3.88696	-3.79017
Gm44567	0.00113681	0.0019716	-4.50357	1.12939	2.74797	-3.07071
Gm4459	0.000500671	0.0011905	5.04806	2.7472	1.1497	3.0262
Gm44597	9.81396e-06	0.0002422	-8.1677	1.99114	3.38787	-2.63303
Gm44639	0.00305859	0.0038238	-3.88007	0.0274186	1.51712	-2.80831
Gm44663	0.00146436	0.00231809	-4.34088	0.335705	3.13952	-6.98285
Gm44664	0.000738658	0.00151052	-4.78633	0.146829	3.18626	-8.2217
Gm44667	1.1917e-06	0.000144627	-10.3185	1.75583	4.02256	-4.81231
Gm44668	3.32244e-06	0.000192705	-9.2219	0.368834	2.9639	-6.04218
Gm44695	0.00185511	0.00271579	-4.19097	-1.02781	1.37507	-5.28856
Gm44699	0.00640693	0.00642201	-3.43293	0.139974	2.31801	-4.52538
Gm44745	0.00141264	0.00226509	-4.36384	1.63286	4.15013	-5.72495
Gm44746	0.00390379	0.00452349	-3.73102	0.614206	2.40206	-3.45301
Gm44777	0.0137223	0.0111522	-2.98363	1.7263	2.76916	-2.06031
Gm44834	0.0056984	0.00593646	-3.50295	-1.12212	1.20094	-5.00394
Gm44860	0.0309904	0.0206846	-2.50853	-1.44062	0.59932	-4.11228
Gm44861	0.0311546	0.0207444	-2.50545	-1.95473	-0.104974	-3.60438
Gm44916	0.000221867	0.000751384	-5.61867	-0.206854	1.09662	-2.46823
Gm44937	0.000349089	0.000965239	-5.2969	-1.2973	2.32011	-12.2729
Gm44951	0.000676989	0.00142871	-4.84443	-1.47962	1.34427	-7.08071
Gm45033	6.71251e-06	0.00022642	-8.52601	-0.912112	1.3189	-4.69462
Gm45084	0.000995141	0.00181294	-4.59007	1.31689	2.94223	-3.08515
Gm4518	0.000102035	0.000510603	6.19563	0.813501	-1.06551	3.67822
Gm45191	0.00220659	0.00304321	-4.0822	2.35299	5.28216	-7.6167
Gm45206	0.00168896	0.00255866	-4.25021	-1.20124	0.827832	-4.08141
Gm45220	0.0033714	0.00408406	-3.82039	1.59666	2.98657	-2.62062
Gm45221	0.00587251	0.00606694	-3.48494	2.16737	3.33274	-2.24291
Gm45222	0.00102652	0.00184808	-4.56983	2.3268	4.17429	-3.59875
Gm45223	0.00121507	0.00204065	-4.46057	2.76628	4.64818	-3.68559
Gm45224	0.0270207	0.018578	2.58847	0.111991	-1.49575	3.04774
Gm45289	0.00113408	0.00196773	-4.50513	-0.361816	1.31005	-3.18625
Gm45292	0.00444679	0.00496309	-3.6521	0.298383	1.49689	-2.29502
Gm45294	0.000225578	0.000757009	-5.60671	0.416404	2.37259	-3.88035
Gm45342	0.000227088	0.000761431	-5.6019	-0.0522215	1.87196	-3.79521
Gm45354	0.00152711	0.00238887	-4.31414	0.285056	1.96335	-3.20049
Gm45358	6.25591e-05	0.000421302	-6.57707	0.112155	2.31248	-4.59584
Gm45360	8.87013e-05	0.00047627	-6.30333	-0.884823	1.64305	-5.76721
Gm4540	0.00465848	0.00511883	3.62402	3.92004	2.45998	2.7512
Gm45403	0.00150312	0.0023625	4.32422	1.08839	-0.269417	2.56296
Gm45407	0.00303676	0.00380273	-3.88447	-0.363382	1.49481	-3.62554
Gm45413	7.72775e-05	0.00045415	-6.41052	-0.520608	1.03598	-2.94157
Gm45477	0.000298835	0.000889564	-5.40608	2.04666	3.89633	-3.60419
Gm45493	0.00271374	0.00351683	-3.95375	1.42646	2.62123	-2.28908
Gm45534	4.13225e-05	0.000358448	-6.91226	-0.86109	1.7167	-5.97025
Gm45555	0.000878821	0.00167636	-4.67148	1.38003	3.254	-3.66539
Gm45606	0.00299258	0.00376401	-3.89348	0.284232	2.57678	-4.89921
Gm45630	0.000491753	0.00117847	-5.06032	0.405731	2.1931	-3.45186
Gm45705	0.0519225	0.0309675	2.20587	1.0889	-0.276447	2.57639
Gm45716	0.00216762	0.00300353	4.09332	1.93694	0.172569	3.39727
Gm45718	0.000197334	0.000707011	-5.70358	0.99475	2.4798	-2.79926
Gm45762	0.00289053	0.00367992	-3.91483	1.50772	2.83738	-2.51344
Gm45779	0.0018825	0.00274208	-4.18174	2.20315	3.49125	-2.44206
Gm45797	3.4112e-05	0.000332202	-7.07112	0.0952614	1.86871	-3.4187
Gm45884	0.00615757	0.00626853	-3.45661	2.19599	4.28376	-4.25091
Gm4596	0.00616233	0.00627092	3.45615	3.30308	2.23094	2.10255
Gm4609	0.00012019	0.000553367	6.07116	3.34842	1.49028	3.62539
Gm4613	0.00357044	0.00423549	3.78536	1.03102	-1.09573	4.36733
Gm4617	0.000254551	0.000815001	5.52001	7.56741	5.87291	3.23665
Gm46218	0.00104507	0.00186626	-4.55817	0.629151	2.07172	-2.71804
Gm46436	0.000273067	0.000846117	-5.46997	-0.636464	1.07255	-3.26937
Gm46496	0.00691223	0.00675702	3.38772	0.92728	-0.745707	3.18874
Gm46522	1.88679e-06	0.000152997	9.81442	0.796324	-1.55375	5.09849
Gm4654	2.70447e-05	0.00030971	7.26683	2.17659	0.335368	3.58313
Gm4691	8.21693e-05	0.000461473	6.36266	1.58537	-0.395505	3.94733
Gm47015	0.00204218	0.00288799	4.13062	5.65045	3.16698	5.59241
Gm47021	0.00128988	0.00212749	4.4221	2.82196	1.25057	2.97192
Gm4705	0.00149012	0.00234979	4.32976	0.741318	-1.19675	3.83191
Gm47087	4.9333e-08	4.08974e-05	-14.4713	1.26807	4.72517	-10.9823
Gm47138	0.000530648	0.00123074	-5.0085	0.356273	2.35288	-3.9906
Gm47139	0.000879674	0.0016764	-4.67085	-0.0859808	1.71817	-3.49224
Gm47166	0.000824624	0.00161346	-4.71341	-0.00403275	1.80223	-3.49735
Gm47218	9.12779e-05	0.000485512	-6.28121	0.394236	1.46836	-2.10545
Gm47246	0.000686971	0.00143964	-4.83466	0.0877981	1.12385	-2.05061
Gm47258	6.80333e-05	0.00043417	-6.51061	0.750255	2.13166	-2.60522
Gm47283	0.0485447	0.0293315	2.24555	3.9343	2.33041	3.03962
Gm47324	0.00177353	0.00263729	-4.21932	-1.21985	0.723949	-3.84717
Gm4735	0.0032687	0.00399866	3.83932	6.18443	4.67702	2.84299
Gm4737	1.28842e-05	0.00026204	7.91809	5.82608	3.80083	4.07061
Gm4740	0.000130166	0.000574637	6.01112	1.29776	-0.584631	3.68685
Gm47483	0.000592994	0.00131669	-4.93335	2.27549	3.34453	-2.09804
Gm47503	0.00172089	0.00258912	-4.23836	-0.297029	1.37038	-3.17642
Gm4754	0.000179229	0.000674164	5.77386	3.84501	2.30373	2.91052
Gm47558	0.000264543	0.000830924	-5.49254	-0.0693949	1.19134	-2.39619
Gm47580	0.00108732	0.00191672	-4.53242	-0.424479	1.33903	-3.39522
Gm47585	0.0145915	0.0116725	-2.94772	0.517783	1.68158	-2.24047
Gm4759	0.00856232	0.00786248	-3.26081	1.03883	5.23042	-18.2725
Gm47652	0.000994483	0.00181294	-4.5905	-0.067261	1.04267	-2.15835
Gm47657	2.3644e-05	0.000305558	-7.38186	0.329695	2.04489	-3.28341
Gm47664	3.92822e-05	0.000352334	-6.95397	0.243381	2.43652	-4.573
Gm47665	0.000351562	0.000970051	-5.29197	0.67019	1.93687	-2.40608
Gm47690	0.0163733	0.0127108	-2.88044	0.830233	1.9393	-2.15705
Gm47798	0.00370369	0.0043545	-3.76303	0.812765	2.23495	-2.67992
Gm47817	0.00499641	0.00538152	-3.58184	0.282992	1.73085	-2.72803
Gm47826	0.000289491	0.000873903	-5.42854	0.633818	2.23268	-3.02904
Gm4784	0.000264337	0.000830924	5.4931	2.9864	1.20471	3.43829
Gm4787	0.00235108	0.00317526	-4.04268	-0.202403	1.75078	-3.87228
Gm47963	0.00143612	0.00228888	-4.35331	1.27422	2.58552	-2.48166
Gm4798	0.000156054	0.000631618	5.87587	2.64664	-2.02821	25.5428
Gm47980	0.000406279	0.00105994	5.19147	1.61956	-0.859878	5.57682
Gm4799	0.0016114	0.0024746	4.28	3.16739	1.81549	2.55249
Gm4800	0.000282895	0.000865974	5.44487	1.76404	0.560531	2.30299
Gm48027	0.00054171	0.00124276	-4.9945	1.68348	3.06633	-2.60782
Gm48062	0.000381188	0.00101514	-5.23563	0.321755	1.8769	-2.93863
Gm4811	0.000537324	0.00123696	5.00001	2.4857	1.43625	2.06974
Gm48114	5.87787e-05	0.00040751	-6.62673	-1.52262	1.74808	-9.65113
Gm48138	8.22956e-07	0.000130795	-10.7403	-0.117352	1.59688	-3.28123
Gm48139	3.47942e-06	0.000192705	-9.17487	0.564564	2.43542	-3.65749
Gm48151	0.00106835	0.00189505	4.54385	1.76486	0.239775	2.87803
Gm48194	9.80631e-05	0.000506023	-6.22605	-0.343138	1.15247	-2.81984
Gm48225	0.000182289	0.00067945	-5.76146	0.0424009	2.4856	-5.43845
Gm48230	0.0588685	0.0342015	-2.13154	-1.81095	-0.279831	-2.8901
Gm48314	0.0107867	0.00930914	-3.12473	1.13557	2.73497	-3.03017
Gm48381	0.0201143	0.0148317	-2.76045	-0.198553	1.09928	-2.45859
Gm48382	0.0603825	0.0348974	-2.11646	0.000712287	1.02571	-2.03496
Gm48442	0.00637224	0.00640663	-3.43617	0.228302	2.50175	-4.83479
Gm48478	0.000138905	0.000595377	-5.96246	-0.126811	1.17181	-2.45994
Gm48569	0.000318773	0.000913531	-5.36057	0.0577418	2.70335	-6.25758
Gm48583	0.000313704	0.000906509	5.37184	4.15222	1.77125	5.20888
Gm48624	0.000632148	0.00137253	-4.89034	1.06538	2.70649	-3.11906
Gm48627	4.76878e-05	0.000375951	-6.79519	0.109988	1.40602	-2.45552
Gm48673	7.83957e-05	0.000456734	-6.39929	-0.483411	1.7754	-4.78596
Gm48706	0.00174168	0.00260455	-4.23077	-0.148703	2.23413	-5.21559
Gm48766	0.000501907	0.00119059	-5.04638	0.52473	2.60843	-4.23894
Gm48870	0.0498837	0.0300128	-2.22951	-0.245103	2.01938	-4.80482
Gm48885	0.0158961	0.0124445	-2.8977	-0.0183641	1.41264	-2.69634
Gm48904	0.0073901	0.00707379	-3.34801	0.449135	1.67609	-2.34073
Gm48909	0.000208756	0.000729033	5.66272	2.07796	0.100667	3.93754
Gm4900	0.000151821	0.000621894	5.89625	4.03019	2.91403	2.16769
Gm49125	0.0131521	0.0108008	-3.00846	0.639186	1.74944	-2.15884
Gm49308	0.00441756	0.00494249	-3.65609	1.11184	2.56166	-2.73174
Gm49342	0.0101836	0.00893223	3.15856	0.820336	-0.866697	3.21994
Gm49383	0.000264254	0.000830924	5.49332	2.46828	1.27069	2.29355
Gm49384	0.000535263	0.00123578	5.00262	1.84985	0.49568	2.5565
Gm49396	1.69436e-05	0.00027256	-7.67276	2.07644	3.5922	-2.85949
Gm4950	0.00168444	0.0025555	4.2519	2.94833	1.40102	2.9227
Gm49553	0.0136219	0.0111047	-2.98793	2.42594	3.89686	-2.77199
Gm4963	0.00129987	0.00214041	4.41715	1.35433	-0.52937	3.69021
Gm4973	0.00536588	0.0056658	3.53898	1.98559	0.906034	2.11339
Gm4977	0.000453246	0.00112627	5.11612	0.456339	-1.52564	3.95035
Gm4987	1.24942e-05	0.000261606	7.94599	1.59257	-1.20112	6.934
Gm5045	0.000692368	0.00144694	4.82943	3.37922	1.76713	3.05694
Gm5134	0.0881071	0.0467957	-1.88969	-0.179956	0.854614	-2.0485
Gm5138	0.000208119	0.000727928	5.66493	3.49523	1.78961	3.26169
Gm5182	0.000177356	0.000669389	5.78156	5.37381	3.81929	2.93737
Gm5191	0.00883191	0.00804681	3.2425	0.691014	-0.391378	2.11754
Gm5256	0.00241212	0.00323462	4.02674	1.7946	0.267499	2.88207
Gm5297	0.00103202	0.00185378	4.56635	3.4224	2.41946	2.00409
Gm5391	0.000586191	0.00130924	4.94113	1.54008	-0.390058	3.81091
Gm5421	0.00191506	0.00277527	4.17095	4.05889	2.84403	2.32118
Gm5422	0.00595472	0.00613033	3.47663	4.06591	3.01119	2.07732
Gm5425	5.61357e-05	0.000403338	6.66356	3.56314	0.703593	7.25789
Gm5436	0.0004166	0.00107348	5.17414	4.13183	2.49432	3.11128
Gm5451	0.00220976	0.00304653	4.0813	0.872852	-2.07712	7.72736
Gm5452	0.000864427	0.00165601	4.68235	3.60512	1.71487	3.70698
Gm5453	0.00125775	0.00208662	4.43832	1.29516	-1.00115	4.91201
Gm5456	0.012369	0.0103175	3.04442	1.88912	0.583283	2.47227
Gm5472	0.00016575	0.000645812	5.83133	0.646134	-1.31273	3.88756
Gm5499	0.00320626	0.00394657	3.85114	2.37138	1.3566	2.0206
Gm5510	0.00909539	0.00821715	3.22515	0.441997	-0.926986	2.58288
Gm5518	0.00639914	0.00642138	3.43365	2.91181	1.797	2.16566
Gm5525	0.000223513	0.000753899	5.61334	3.73486	1.95116	3.44308
Gm5527	0.00135102	0.00220044	4.39239	2.00115	0.775576	2.33849
Gm5529	0.00133599	0.00218499	4.39956	3.49053	2.11269	2.59879
Gm5537	0.00346552	0.0041525	3.80356	5.61115	4.09481	2.86064
Gm5540	0.0299658	0.0201785	2.52815	1.43443	-0.133187	2.96415
Gm5555	0.000309466	0.000902798	5.38142	2.7121	1.61845	2.13413
Gm5559	0.000116234	0.0005472	6.09647	4.51042	2.81968	3.22822
Gm5560	0.00200585	0.0028564	4.14187	5.20505	3.857	2.54569
Gm5566	0.000151618	0.000621894	5.89725	2.88732	0.280145	6.09309
Gm5576	0.00191421	0.00277527	4.17123	2.29444	1.01178	2.43288
Gm5580	0.00167658	0.00254552	4.25486	2.6337	1.27112	2.57146
Gm5586	1.48865e-05	0.000266964	7.78798	2.57821	0.266756	4.96381
Gm5597	0.00607148	0.00620793	3.46502	1.16885	-1.27835	5.45355
Gm5611	0.000141999	0.000603431	5.94601	2.65006	1.02093	3.09326
Gm5616	0.000100418	0.000508145	6.20786	3.56449	1.39261	4.50608
Gm5626	5.52597e-05	0.000399937	6.67617	1.46471	-0.498955	3.90052
Gm5637	0.0838915	0.0450932	1.9194	3.70299	2.66533	2.05289
Gm5644	0.000407544	0.00106121	5.18932	3.81093	2.35682	2.73988
Gm5648	0.000317881	0.000913085	5.36254	4.85448	3.16035	3.2358
Gm5776	0.0186994	0.0140505	2.80296	2.14349	1.11436	2.04079
Gm5781	1.32717e-05	0.00026204	7.89127	1.21753	-1.07936	4.91399
Gm5786	0.000715155	0.00147843	4.80784	2.39731	0.432669	3.90317
Gm5801	0.000398323	0.00104536	5.20515	3.02422	1.84228	2.26882
Gm5805	5.47976e-05	0.000399924	6.68292	6.21153	4.08161	4.37694
Gm5812	1.52671e-06	0.000150959	10.0441	5.00368	2.50267	5.66085
Gm5822	7.08351e-05	0.000438398	6.4788	2.10276	0.500342	3.03651
Gm5835	1.33219e-05	0.00026204	7.88786	6.98158	5.08191	3.73128
Gm5837	8.03552e-05	0.000461385	6.38004	4.36728	2.62915	3.33601
Gm5841	0.00157328	0.00243806	4.2952	3.50453	2.15136	2.55473
Gm5846	0.000769585	0.00154513	4.75911	4.04888	3.01045	2.05399
Gm5854	7.25092e-06	0.00022642	8.45226	1.43832	-0.868955	4.94949
Gm5864	0.00172883	0.00259577	4.23545	3.5329	2.36347	2.24923
Gm5869	3.5925e-05	0.000338512	7.02797	6.04738	4.08775	3.88963
Gm5873	0.0202003	0.0148717	2.75796	0.58977	-0.585241	2.25795
Gm5879	4.13354e-06	0.000202765	9.00109	2.23799	-0.190658	5.38391
Gm5903	0.000457515	0.0011308	5.10969	4.48434	3.30359	2.26694
Gm5905	9.89446e-05	0.000507266	6.21918	7.14162	5.20694	3.82293
Gm5909	0.00133493	0.00218457	4.40007	3.15156	2.11754	2.04771
Gm5910	0.000903389	0.00170278	4.65337	2.80301	0.959955	3.58769
Gm5913	0.000558374	0.00126719	4.97397	4.88743	3.48775	2.63843
Gm5921	2.29735e-05	0.000305558	7.40665	0.994792	-1.77402	6.81547
Gm5931	0.000363047	0.00098016	5.26955	4.21036	3.05732	2.22381
Gm5946	0.000698611	0.00145703	4.82344	0.899101	-0.665932	2.95884
Gm5963	0.000170591	0.000654263	5.81013	2.12718	0.348321	3.43156
Gm6047	8.32487e-05	0.000461473	6.35251	0.381112	-1.4093	3.45914
Gm6061	0.0311306	0.0207363	2.5059	2.6268	1.38365	2.36714
Gm6085	0.000293507	0.000881491	5.4188	2.71983	1.39961	2.49704
Gm6087	0.0185794	0.0139735	2.80671	2.20685	0.782613	2.68373
Gm6104	9.9369e-05	0.000507266	6.2159	2.97335	1.23647	3.33313
Gm6123	0.00227907	0.00310759	4.06204	3.71243	2.41307	2.46119
Gm6136	9.12264e-05	0.000485512	6.28165	7.9001	5.99661	3.74117
Gm6139	6.93778e-06	0.00022642	8.4944	3.7561	1.15679	6.05998
Gm6142	0.00730233	0.00701853	3.3551	2.81342	1.60381	2.31275
Gm6166	0.00783048	0.00735882	3.31368	2.55549	0.806874	3.36037
Gm6169	0.00121182	0.00203952	4.46229	2.47286	0.895268	2.9847
Gm6170	0.000232501	0.00077136	5.58495	5.38872	3.52933	3.62856
Gm6180	0.00344516	0.00413683	3.80716	5.29961	4.10882	2.28278
Gm6189	0.047212	0.0287009	2.26195	1.30299	-0.895455	4.58983
Gm6195	0.0224713	0.0161428	2.69589	2.56477	1.41386	2.22055
Gm6204	6.42065e-05	0.000424123	6.55643	6.69503	4.71451	3.94637
Gm6211	4.91348e-06	0.000209034	8.82938	1.21091	-1.21955	5.39064
Gm6212	0.000318893	0.000913531	5.3603	0.906874	-0.800636	3.26597
Gm6257	0.000370605	0.000995631	5.2552	1.60543	-0.654233	4.7888
Gm6274	0.000554195	0.00126479	4.97906	5.6647	4.22761	2.70775
Gm6286	6.57607e-06	0.00022642	8.54572	4.0933	2.15514	3.83217
Gm6304	5.3403e-05	0.000395873	6.70365	1.4214	-1.26658	6.44411
Gm6311	4.99788e-06	0.000209034	8.8126	4.10183	1.53208	5.93706
Gm6344	0.000165449	0.000645812	5.83267	5.61739	3.74614	3.65849
Gm6361	0.0184744	0.0139262	2.81002	1.40992	-0.671959	4.23359
Gm6365	0.00520737	0.00553817	3.55698	0.384622	-0.696576	2.11579
Gm6368	4.20516e-05	0.000358448	6.89789	3.91611	1.63958	4.84511
Gm6382	0.000117708	0.000549817	6.08693	3.56922	2.23774	2.51661
Gm6392	1.6277e-05	0.00027256	7.70835	1.6914	-0.0965734	3.45329
Gm6394	0.000353319	0.000972752	5.28849	3.20878	1.48023	3.31394
Gm6419	0.0105874	0.00919907	3.13569	1.28862	0.154106	2.19544
Gm6421	0.00300267	0.00377432	3.89141	0.966033	-0.330162	2.4558
Gm6433	4.74404e-06	0.000209034	8.86403	1.90755	-0.747455	6.2985
Gm6451	0.000554897	0.00126519	4.9782	1.9429	0.682731	2.39523
Gm6457	0.000139223	0.000595457	5.96075	3.2709	1.68519	3.00157
Gm6472	0.000102905	0.000514309	6.18914	9.07717	7.03766	4.11106
Gm6474	0.000187257	0.000687646	5.7418	2.90773	1.29832	3.05125
Gm6477	3.83289e-05	0.0003501	6.97426	5.30323	3.28859	4.04079
[truncated: 2,696 more rows]

## Sheet: Comparison 3
Probeset ID	p-value	qvalue(p-value)	t	Mean(T-ALL)	Mean(WT T cells)	FoldChange(T-ALL/WT T cells)	p-value	qvalue(p-value)	t	Mean(B-ALL)	Mean(WT pro-B cells)	FoldChange(B-ALL/WT pro-B cells)
0610010F05Rik	0.000993568	0.00181294	4.5911	4.57879	2.88779	3.22881
0610012G03Rik	0.0084189	0.00777029	3.2708	2.9154	1.72976	2.27464
1110004F10Rik	0.00153783	0.00240185	4.30969	5.14994	3.90512	2.36988
1110008L16Rik	0.00081151	0.00159624	4.724	3.26912	2.18274	2.12342
1110032F04Rik	0.000766727	0.00154173	4.76157	2.2773	-0.615822	7.42877
1110038B12Rik	0.000164514	0.000645281	5.83685	4.70567	2.37727	5.02248
1110038F14Rik	0.000172049	0.000656053	5.80387	3.29028	2.25846	2.04461
1110059E24Rik	0.00700816	0.00681325	3.37953	3.71099	2.55865	2.22276
1110065P20Rik	0.000638462	0.00137945	4.88367	1.82703	0.281887	2.91832
1190007I07Rik	0.000441298	0.00111399	5.13447	1.79417	0.268523	2.87917
1300014J16Rik	0.0150148	0.0119094	-2.93101	-0.31401	1.17599	-2.80889
1500009L16Rik	0.0784401	0.0427477	1.95997	2.79039	0.979938	3.50752
1700017B05Rik	0.0191424	0.0142914	2.78931	5.03797	3.79033	2.37452
1700019D03Rik	0.000182153	0.00067945	-5.76201	0.606854	2.39191	-3.44631
1700025G04Rik	0.0366691	0.0235036	-2.41023	1.67786	3.34507	-3.17601
1700056N10Rik	0.0074568	0.00710853	-3.34268	0.56049	1.6393	-2.1123
1810032O08Rik	0.00467336	0.0051295	3.6221	3.37376	2.34742	2.03685
1810034E14Rik	0.0411967	0.0257452	2.34203	0.77528	-0.280647	2.07905
1810055G02Rik	0.0113568	0.00967918	3.09449	0.862945	-0.337728	2.29847
2010016I18Rik	0.0952971	0.049763	1.84193	5.40719	4.28763	2.1728
2010320M18Rik	0.00198919	0.00284588	4.1471	1.82595	0.642108	2.27181
2310001H17Rik	0.000858127	0.00164955	-4.68716	1.02044	2.96445	-3.84775
2310009B15Rik	0.000908885	0.00170828	4.64939	2.28205	0.856056	2.687
2310022B05Rik	0.0689159	0.0386105	2.03766	1.40248	0.307428	2.1362
2310039H08Rik	0.00204361	0.00288799	4.13018	1.99599	0.153635	3.58594
2310043P16Rik	0.00200545	0.0028564	-4.14199	1.43367	3.27492	-3.5832
2410006H16Rik	0.000556635	0.0012662	4.97608	4.55748	2.0673	5.61848
2410015M20Rik	0.00277149	0.00356724	3.94075	4.01221	2.54276	2.76915
2410022M11Rik	0.00181393	0.00267434	4.20511	0.91979	-0.74376	3.16795
2510016D11Rik	0.00590556	0.0060917	-3.48158	-0.437659	1.02039	-2.74736
2510017J16Rik	0.00770219	0.00727143	-3.32347	-0.0926648	0.915143	-2.01085
2610008E11Rik	0.0411098	0.0257111	-2.34327	3.72248	4.86185	-2.20285
2610301B20Rik	0.000800509	0.00158322	4.73302	2.83646	1.55349	2.4334
2610307P16Rik	0.00880348	0.00802642	-3.24441	3.3626	4.89693	-2.89654
2610318N02Rik	0.00140933	0.00226069	4.36534	3.11649	1.83048	2.43853
2610507I01Rik	0.0674612	0.0380045	-2.05042	-0.165381	1.455	-3.07456
2810001G20Rik	0.0242874	0.0170766	-2.65062	1.03016	2.32867	-2.45974
2810002D19Rik	0.000303866	0.000896285	-5.3943	0.206681	2.35168	-4.42292
2810004N23Rik	0.000525264	0.00122264	5.01542	4.66402	3.55285	2.16021
2810025M15Rik	0.0554491	0.0326348	2.16701	-1.85613	-3.13136	2.42037
2810408I11Rik	5.11996e-05	0.00038557	6.73763	1.60072	-0.742769	5.07529
2810428J06Rik	0.000294916	0.000883473	-5.41541	0.33976	1.44193	-2.14677
2810429I04Rik	0.00974411	0.00864982	-3.18454	-3.85756	-0.8113	-8.26065
3110082I17Rik	8.20179e-06	0.000232775	8.3355	1.82752	-0.81114	6.22753
4632418H02Rik	0.00107299	0.0018982	-4.54104	0.385935	2.03407	-3.13428
4632427E13Rik	0.000149988	0.000620783	-5.90527	4.33419	5.53807	-2.30359
4732440D04Rik	0.000210506	0.000731521	-5.65667	2.6849	3.79401	-2.15712
4833421G17Rik	8.52382e-05	0.000467144	-6.33417	-1.15753	1.49403	-6.28349
4930402H24Rik	0.00370786	0.00435617	-3.76234	1.98789	3.91884	-3.81306
4930412F12Rik	0.00320392	0.00394635	-3.85159	-0.234645	1.14768	-2.60689
4930503E24Rik	0.000708992	0.00147182	4.81361	1.23967	-0.487736	3.31131
4930518I15Rik	7.00751e-06	0.00022642	-8.48484	0.328838	1.78152	-2.73717
4930523C07Rik	0.0055704	0.00583063	-3.51655	4.23801	5.49232	-2.38553
4930594C11Rik	0.00202185	0.00286772	-4.13689	0.680301	2.54151	-3.63313
4933404O12Rik	0.00260178	0.00342186	3.97981	2.46668	1.05398	2.66235
4933407K13Rik	0.0611318	0.0352331	-2.10913	0.89488	3.11089	-4.64608
4933421O10Rik	0.0121918	0.010222	3.05287	1.09933	-0.100657	2.29737
5330406M23Rik	1.77958e-05	0.000275421	-7.6294	-0.372456	1.47288	-3.59336
5330426L24Rik	0.00035479	0.000973354	5.28559	2.05788	-3.67952	53.3494
5430427O19Rik	0.0496888	0.0299149	-2.23182	-0.861694	0.285231	-2.21441
5430434F05Rik	0.000438467	0.00110873	-5.13889	0.24212	3.00133	-6.77027
5730455P16Rik	0.000307388	0.000901033	5.38617	3.72223	2.46865	2.38432
5830418P13Rik	0.00170607	0.00257341	4.24383	4.378	2.81438	2.95593
5830428M24Rik	0.00142067	0.00227338	-4.36022	-0.23854	2.22397	-5.51174
5830432E09Rik	0.000345084	0.000960178	-5.30496	1.90429	3.70297	-3.47903
5830444F18Rik	2.61532e-05	0.000307631	-7.29541	2.91735	6.34801	-10.7829
5830462O15Rik	0.000195951	0.000702687	-5.7087	0.687178	3.11298	-5.37327
5930420M18Rik	0.018329	0.0138455	-2.81462	-0.158883	1.04661	-2.30616
5930430L01Rik	0.00819422	0.00761066	-3.2868	1.37003	3.33306	-3.89881
6030442K20Rik	0.000960913	0.00177914	-4.61293	0.0354169	1.2583	-2.33413
6330537M06Rik	0.00754262	0.00717153	-3.33589	-2.1473	-0.70673	-2.71428
6430511E19Rik	0.000929892	0.00173626	-4.63441	2.34134	3.70406	-2.57169
6430590A07Rik	0.0767604	0.0420624	-1.973	0.568415	1.74292	-2.25715
6720464F23Rik	6.74816e-05	0.000433161	-6.51704	-1.52344	1.85915	-10.4295
9130401M01Rik	0.000107348	0.000524781	6.15688	3.07219	1.04033	4.08931
9230112E08Rik	9.53861e-07	0.000135357	-10.5704	2.24587	3.31839	-2.1031
9230116N13Rik	0.000119533	0.000552903	6.0753	0.690666	-1.66377	5.11394
9330020H09Rik	0.00997571	0.00881014	3.1707	1.41603	0.41135	2.00649
9330175E14Rik	0.000191073	0.000693241	-5.72707	-1.47057	1.83238	-9.86929
9430034N14Rik	9.8805e-05	0.000507216	-6.22026	1.99114	3.13599	-2.21122
9430038I01Rik	0.000250122	0.000804059	5.53256	1.97761	0.110699	3.64752
9430091E24Rik	0.00450719	0.0050024	-3.64395	-0.607291	0.842964	-2.73256
9530056E24Rik	0.000482514	0.00116688	-5.07327	-0.792608	1.70034	-5.62926
9930024M15Rik	0.000900803	0.00169871	-4.65525	0.143617	2.29124	-4.43098
9930111J21Rik1	0.000759201	0.00153513	-4.76812	1.99974	4.16562	-4.48739
9930111J21Rik2	0.00106907	0.00189548	-4.54341	2.64234	4.63149	-3.97005
9930120I10Rik	0.00652419	0.00650183	-3.42212	-2.10802	-0.45027	-3.15525
A130012E19Rik	0.000785641	0.00156315	-4.74543	1.85341	2.9767	-2.17843
A130014A01Rik	0.00884824	0.00805799	-3.24141	0.0632505	1.2181	-2.22661
A130048G24Rik	8.99118e-05	0.000480821	-6.29285	1.41465	4.11475	-6.49844
A130050O07Rik	1.16134e-05	0.000254221	-8.01263	3.32015	6.33084	-8.05948
A130071D04Rik	2.56884e-06	0.000172056	-9.48755	5.24918	6.97414	-3.30571
A330023F24Rik	0.00034052	0.000952146	-5.31428	-1.49735	1.23604	-6.65017
A330035P11Rik	0.000970873	0.0017909	4.60619	0.419928	-0.915492	2.52349
A430005L14Rik	0.000626191	0.00136279	4.89669	2.73122	1.29554	2.70509
A430035B10Rik	0.000289461	0.000873903	-5.42862	1.29401	4.53921	-9.48209
A430078G23Rik	0.000667404	0.00142189	-4.85397	3.59012	4.87366	-2.43436
A430093F15Rik	7.43758e-05	0.000443058	-6.44048	0.0303629	3.08055	-8.28322
A430106G13Rik	2.4223e-06	0.000171868	-9.54906	3.37648	6.34546	-7.82982
A430110C17Rik	0.000802435	0.00158414	-4.73143	2.43807	4.0306	-3.01577
A530032D15Rik	0.0113796	0.00969654	-3.09331	-1.32993	0.193257	-2.87425
A530064N14Rik	0.0516338	0.0308231	-2.20916	-0.110384	1.46816	-2.98668
A630019I02Rik	0.000661324	0.00141272	-4.86009	-0.0126477	2.2368	-4.75502
A630072M18Rik	2.76273e-05	0.00030971	-7.24871	2.37327	3.40883	-2.04991
A630081D01Rik	7.4225e-05	0.000443058	-6.44207	0.8011	3.10581	-4.94069
A930015D03Rik	0.0105192	0.00915782	3.1395	1.87018	0.392484	2.78504
A930024E05Rik	6.89501e-05	0.00043417	-6.50005	0.700049	2.50019	-3.48254
AA465934	0.000355881	0.000973712	5.28345	2.96545	0.517786	5.45532
AA467197	0.0106328	0.00922225	3.13318	1.44347	-2.2489	12.9275
AC113060.1	0.0117336	0.0099163	3.07534	-1.434	-4.03597	6.07114
AC113125.1	0.0398314	0.0250853	2.36179	2.92934	1.77304	2.22884
AC113595.1	0.00751821	0.00715334	3.33781	0.534609	-0.916143	2.73351
AC114990.3	0.00196121	0.00281828	4.15599	3.76035	2.21982	2.90903
AC117239.2	0.0013774	0.00223564	4.38	4.30119	2.72809	2.97543
AC121151.1	3.23804e-05	0.000326405	7.11471	3.43268	1.35987	4.20706
AC121783.1	0.00010753	0.000524781	6.15559	0.818422	-1.32279	4.41132
AC122253.2	6.90782e-05	0.000434289	6.49858	4.71661	2.9165	3.48245
AC122453.1	8.01804e-06	0.000230858	8.35688	4.88316	2.57348	4.95771
AC123927.1	0.000263616	0.000830637	-5.49504	0.977759	2.49521	-2.86284
AC123927.2	0.000343305	0.00095791	-5.30858	2.23128	4.32846	-4.2787
AC123927.3	0.000529867	0.00123074	-5.0095	2.69745	4.69803	-4.0016
AC123956.1	1.56718e-05	0.000269564	7.74206	3.55673	1.39563	4.47254
AC124740.2	0.00321988	0.00395721	3.84854	1.09026	-0.070092	2.23512
AC125028.1	6.45529e-05	0.000424652	6.55216	4.89304	3.27505	3.06947
AC129214.1	0.0499502	0.0300301	-2.22873	1.53247	2.82778	-2.45429
AC131339.2	0.00941228	0.00842418	3.20495	1.81858	-1.6409	11.0003
AC132091.1	0.000349017	0.000965239	5.29704	0.638389	-1.90231	5.81869
AC139060.1	0.00076906	0.00154486	4.75956	0.561952	-1.20075	3.39332
AC148013.1	0.000160753	0.000639207	5.85393	5.56243	3.62719	3.82442
AC154187.2	0.0804609	0.0436388	1.94463	3.30629	2.28109	2.03525
AC154306.1	1.72381e-05	0.00027397	7.65751	2.64826	0.511624	4.39736
AC154457.3	0.000146824	0.000615097	5.92112	1.05799	-0.652706	3.27319
AC154540.2	0.000994825	0.00181294	4.59028	4.57532	2.65913	3.77425
AC154542.1	0.00513681	0.00548368	-3.56518	-2.63524	0.808952	-10.8844
AC154707.2	0.00571928	0.00595041	3.50076	2.16721	1.01543	2.22188
AC154912.5	0.000328008	0.000928264	5.34051	3.83751	2.40851	2.69259
AC161530.1	0.000129384	0.000573757	-6.01564	0.334544	1.96797	-3.10249
AC163399.1	5.82013e-05	0.00040751	6.63462	0.902537	-1.60043	5.6685
AC165079.1	0.000285552	0.000870753	5.43825	1.86653	-0.653371	5.73544
AC165958.1	0.0028773	0.00367132	3.91765	0.639298	-0.454284	2.13403
AC167249.1	0.000120767	0.000554735	6.06755	2.19486	-2.34183	23.2102
AC183095.1	0.000174379	0.000661762	5.79399	3.67197	-1.13729	28.037
AC183097.1	0.0123492	0.0103104	3.04536	2.53866	0.444076	4.27104
AC183097.2	0.00399057	0.00459748	3.71767	1.51043	-0.710356	4.66149
AI480526	0.000240111	0.000783285	-5.56182	2.97931	4.0824	-2.14814
AI506816	4.40625e-05	0.000359155	6.85963	5.87229	4.15656	3.28463
AI662270	0.000146911	0.000615097	5.92068	7.10747	5.2846	3.53785
AK157302	0.00570636	0.00594163	3.50211	2.21214	1.16076	2.0725
AW011738	0.0301284	0.0202624	2.52499	3.53799	1.8203	3.28909
AW112010	0.0365502	0.0234539	-2.41213	-0.337195	1.45839	-3.47157
Aaas	0.000116463	0.000547629	6.09498	4.32342	3.02787	2.4547
Aars	0.007203	0.00695164	3.36323	5.72751	4.30978	2.67163
Aars2	0.0744683	0.0410726	1.99123	4.49723	3.43205	2.09243
Aarsd1	0.00107453	0.00190008	4.54011	3.68226	2.3032	2.60098
Aatf	0.00193305	0.00279368	4.16508	4.29956	3.22536	2.10555
Abca1	0.0194304	0.0144548	-2.78061	4.50987	5.84283	-2.51919
Abca13	0.0372523	0.0237936	-2.40099	-1.78626	-0.170687	-3.06434
Abca7	0.0620344	0.0356344	-2.10041	3.7651	4.76913	-2.00559
Abcb10	0.0939851	0.0492787	1.85039	2.55776	0.576856	3.9474
Abcb6	4.87943e-07	9.70057e-05	11.3609	2.71026	-0.0871247	6.95179
Abcb8	0.000548193	0.0012547	4.98643	3.93329	2.58894	2.53916
Abcc1	0.0568761	0.033307	-2.15196	1.52517	3.01949	-2.81732
Abce1	0.00827364	0.00766966	3.28109	6.71286	5.66394	2.06898
Abcg3	0.0023679	0.00319472	-4.03824	2.8004	4.94153	-4.41109
Abhd1	0.00349494	0.00417515	-3.7984	-0.853737	0.592004	-2.72403
Abhd12	0.00167577	0.00254552	4.25517	3.62693	2.52125	2.15201
Abhd14a	0.0149286	0.0118748	2.93437	0.862225	-0.702763	2.95875
Abhd16a	0.00064752	0.00139372	4.87422	3.77569	2.67674	2.14199
Abhd4	8.74234e-05	0.000473246	6.31456	3.03259	0.345408	6.44055
Acaa2	8.3009e-05	0.000461473	6.35475	5.45183	3.4675	3.95679
Acaca	1.88595e-05	0.000284315	7.57834	5.19	3.53294	3.15373
Acadl	0.00326354	0.00399727	3.84029	3.36424	1.83168	2.89299
Acads	0.000481948	0.00116688	5.07407	4.30171	2.50218	3.48107
Acap1	0.00123809	0.00206609	-4.44847	5.94577	6.99072	-2.0633
Acat1	0.00802592	0.00749639	3.29908	4.95906	3.79103	2.24705
Acat2	0.000105292	0.000519059	6.17162	3.92765	2.69896	2.34354
Acbd6	0.000669462	0.00142315	4.85191	3.40998	2.12025	2.44481
Ackr2	0.040193	0.025261	2.35649	-3.20072	-4.43696	2.35584
Aco1	0.000358045	0.000973712	5.27922	4.53557	3.2727	2.39972
Aco2	0.000496864	0.001185	5.05326	6.54852	5.34004	2.31094
Acot2	8.05438e-05	0.000461473	6.37821	2.43264	0.507167	3.79862
Acot6	0.000953393	0.00177099	4.61807	1.18639	-0.952914	4.40549
Acot7	0.00164446	0.00251018	4.26712	4.12944	2.66849	2.7529
Acp1	0.00810525	0.0075492	3.29326	3.989	2.75595	2.35063
Acp5	0.026642	0.018378	2.5967	5.03336	3.9882	2.0636
Acpp	0.0370535	0.0236926	-2.40413	0.993463	3.40042	-5.30355
Acrbp	0.00158546	0.00245215	-4.2903	1.07955	2.25236	-2.2545
Acsf2	0.0188766	0.0141466	2.79746	1.85721	0.069421	3.45286
Acsf3	0.00123515	0.00206308	4.45	2.58627	1.47631	2.1584
Acsl5	0.00430327	0.00486024	3.67194	5.60512	4.14147	2.75805
Actl6a	0.00066251	0.00141297	4.85889	5.53284	4.37725	2.22775
Actn1	0.00555825	0.00582098	3.51786	6.68599	5.63329	2.07441
Adam19	0.0427241	0.0264967	2.32067	5.68836	2.86829	7.062
Adam4	0.000427373	0.00109022	-5.15653	0.0288117	2.64964	-6.15101
Adam9	0.00027459	0.000848502	5.46602	2.90009	1.63167	2.40897
Adamts6	0.000170077	0.000654263	-5.81235	-0.24486	4.81225	-33.2923
Adamtsl2	0.00446398	0.00497575	-3.64977	-1.19507	0.946345	-4.41193
Adck1	0.00461419	0.00508141	3.62979	2.9245	1.6843	2.36232
Adck5	6.95565e-05	0.000434546	6.49314	2.98749	1.98278	2.00655
Adgra2	0.0910887	0.048039	1.86946	-0.987496	-2.07872	2.13054
Adgra3	0.0271897	0.018678	-2.58484	-1.47095	2.03756	-11.3806
Adgrg1	0.00288879	0.00367989	3.9152	3.86918	2.65143	2.32583
Adh5	0.00183592	0.0026996	4.19752	5.59337	4.34897	2.3692
Adi1	0.00364746	0.00430814	3.77235	3.32832	1.93865	2.62017
Adk	0.000690798	0.0014458	4.83095	4.85573	2.81118	4.12546
Adm	0.0344991	0.0224679	2.4459	0.688796	-2.54072	9.37955
Adnp	0.00567216	0.00591377	-3.50571	3.53725	5.32966	-3.46393
Adprhl2	0.00274391	0.00354419	3.94693	3.8224	2.79335	2.04067
Adsl	8.55014e-06	0.000234294	8.29637	5.61507	3.73394	3.68363
Adssl1	0.00123719	0.00206546	4.44893	1.37839	-0.930541	4.95516
Afdn	3.13831e-05	0.000325169	7.14098	6.27528	1.84125	21.6161
Afg3l1	0.0025185	0.00334007	3.99996	4.41146	3.35158	2.08475
Agfg1	0.0162052	0.0126079	2.88646	8.07035	5.48183	6.01481
Agfg2	0.000306683	0.000901033	-5.38779	3.60563	5.34341	-3.3352
Agpat2	0.000677159	0.00142871	4.84427	3.02132	-0.486931	11.3786
Agpat4	0.0134953	0.0110196	2.99339	2.88115	1.40461	2.7828
Agrn	0.00522268	0.00554923	3.55522	3.64508	2.30066	2.53926
Ahcy	0.016458	0.0127603	2.87742	2.63078	0.756499	3.66619
Ahi1	0.0506104	0.0303123	2.22098	4.5273	3.40621	2.17511
Aimp2	0.000255989	0.000817292	5.51599	3.30611	1.47171	3.56622
Aip	0.00695666	0.00677977	3.38391	3.85289	2.59955	2.38392
Airn	0.00400371	0.00460926	-3.71567	1.92459	3.44664	-2.87198
Ak2	0.00157838	0.00244404	4.29314	5.19517	3.91292	2.43219
Ak6	0.000230782	0.000769274	5.59029	5.54871	4.0007	2.92413
Akap1	0.018654	0.0140217	2.80437	3.97341	2.67665	2.45677
Akap7	0.000141239	0.000602134	5.95001	1.11063	-0.00266735	2.1634
Akr1a1	0.000153568	0.000626429	5.88777	6.65818	5.1686	2.80806
Akr1c13	0.000450688	0.00112627	-5.12	-1.71499	0.649877	-5.15104
Akr7a5	2.33148e-05	0.000305558	7.39394	2.6483	0.0876253	5.89983
Akt1	0.0055437	0.0058088	3.51943	5.92151	4.77506	2.21369
Akt3	0.0361305	0.0232936	-2.41888	1.96035	3.96515	-4.01335
Alad	4.36761e-05	0.000359155	6.86683	3.35847	0.779	5.9772
Alas2	0.0598428	0.0346359	2.12179	3.20494	1.33189	3.66305
Aldh18a1	0.0606367	0.0350087	2.11396	4.60209	3.38465	2.32534
Aldh1a1	0.0457461	0.0280025	2.28051	-1.15697	-2.8712	3.28122
Aldh1b1	0.0222335	0.0160039	2.70209	3.78601	0.96088	7.08679
Aldh2	0.000216465	0.000742735	5.63647	3.55401	2.14217	2.66076
Aldoa	0.00121456	0.00204065	4.46083	5.96488	4.35292	3.05666
Alg5	0.000946899	0.00176297	4.62254	3.40564	2.30279	2.14778
Alpk1	0.0664577	0.037562	-2.05937	-0.114287	1.1153	-2.34499
Als2cl	0.00693594	0.00676622	-3.38569	2.7048	6.14815	-10.8781
Alyref	0.000104256	0.000517804	6.17917	6.03753	4.6108	2.68837
Amd-ps3	0.00308978	0.00385333	3.87384	3.3193	1.89801	2.67825
Amfr	0.0183624	0.0138633	2.81356	5.56994	4.51385	2.07929
Ampd2	0.00529762	0.00561013	3.54666	4.17294	3.09319	2.11368
Ampd3	0.00255964	0.00338221	3.98992	2.88867	-0.0442697	7.63665
Anapc13	0.00177698	0.00263847	4.21809	2.64083	1.34312	2.45839
Anapc15-ps	0.000373002	0.000999878	5.25072	0.5167	-0.934223	2.73383
Angpt1	0.0171745	0.0131788	2.85256	3.04806	1.88691	2.23635
Angptl2	0.0209636	0.0153067	2.73635	4.52647	3.47497	2.07269
Angptl4	0.000110417	0.000531576	6.13543	2.65629	0.531138	4.36248
Ank1	0.0232367	0.0165342	2.67638	-0.0827157	-3.51744	10.8132
Ank3	0.0204484	0.015007	-2.75085	-1.4572	1.26342	-6.59159
Ankrd13d	0.0128319	0.0106131	-3.02289	1.06277	2.25544	-2.28574
Ankrd33b	0.010449	0.0091194	-3.14343	-1.10801	0.650519	-3.38352
Ankrd50	0.00240768	0.00323084	-4.02789	4.83324	6.00128	-2.24706
Ankrd55	0.00914368	0.00825139	-3.22203	-0.844231	1.84839	-6.46489
Ankrd6	0.0465754	0.028379	-2.26994	2.86299	4.12464	-2.39769
Ano10	3.50599e-05	0.000334867	7.04826	4.64135	2.74811	3.71471
Anp32b	2.70179e-05	0.00030971	7.26768	5.77161	4.26381	2.84376
Anp32b-ps1	0.00072256	0.00148909	4.80099	2.61226	1.24623	2.5776
Anp32e	0.000513256	0.00120814	5.03115	7.44722	6.3787	2.09728
Anxa1	0.0426182	0.0264588	2.32212	1.32914	-0.678368	4.02087
Anxa11	0.00475461	0.00519001	3.61171	5.31331	3.4785	3.56724
Anxa4	0.0013214	0.00216688	4.4066	1.94325	0.718683	2.33686
Anxa5	0.0253811	0.0176982	-2.62495	2.80263	3.90203	-2.14266
Anxa6	0.0710863	0.0395643	2.01911	5.86716	4.77425	2.13304
Ap1s1	0.00383778	0.00447179	3.74139	3.51242	2.32703	2.27425
Ap5s1	0.00484151	0.00526318	3.6008	1.54634	0.524072	2.03111
Apex1	4.238e-05	0.000358448	6.89151	5.47339	2.68293	6.91853
Aph1a	0.00607621	0.00621117	3.46456	3.99295	2.95135	2.0585
Aph1b	0.0123161	0.0102918	3.04693	0.680168	-0.497248	2.26171
Apip	0.0102348	0.00896757	3.15562	1.68268	0.530286	2.22282
Apmap	0.00288958	0.00367989	3.91503	4.01246	2.82624	2.27556
Apobec3	0.00956725	0.00852711	3.19533	5.79416	4.19147	3.03708
Apobr	0.068666	0.038514	-2.03984	-0.312694	0.819848	-2.19245
Apoe	0.0185119	0.0139386	2.80883	5.4473	4.04593	2.64152
Apol11b	0.00421127	0.0047849	3.68503	1.13252	-3.51744	25.1061
Apoo	0.00215584	0.00299192	4.09673	1.06532	-0.0214075	2.12392
Aprt	0.00158944	0.00245544	4.28871	3.37354	1.55279	3.53266
Aqp11	0.00295282	0.00373054	-3.9017	4.9329	7.20419	-4.82753
Ar	0.0426001	0.0264558	-2.32237	-1.36142	0.555431	-3.77598
Arap2	0.0234529	0.0166575	-2.67098	5.05371	7.00655	-3.87136
Arf2	0.0014235	0.00227425	4.35894	3.91933	2.88919	2.04222
Arf4	0.00683034	0.00670435	3.39481	5.3334	4.05009	2.43397
Arhgap17	0.000471075	0.00115308	-5.08968	2.85515	3.96924	-2.16457
Arhgap23	0.00504278	0.00541238	3.57628	1.38523	0.258656	2.1834
Arhgap24	0.002068	0.00291172	-4.12275	-1.63237	2.61595	-19.0052
Arhgap25	0.0763066	0.0418819	-1.97657	3.31861	4.85006	-2.89076
Arhgap27os3	0.0755605	0.0415827	-1.98248	0.744318	1.96575	-2.33178
Arhgap29	0.0178999	0.0136142	-2.82843	-0.651791	1.79472	-5.45094
Arhgap32	0.0104612	0.00912341	-3.14275	-1.59933	1.29301	-7.42471
Arhgap4	0.000347542	0.000962543	-5.3	5.20958	6.97846	-3.40789
Arhgap45	0.00228034	0.00310826	-4.0617	7.22455	8.4023	-2.26223
Arhgef1	0.0150105	0.0119094	-2.93118	6.0268	7.14547	-2.17147
Arhgef10l	0.00808753	0.00753799	3.29456	4.31961	0.600049	13.1735
Arhgef11	0.0105299	0.00916111	-3.1389	2.33079	4.28619	-3.87824
Arhgef12	0.000785221	0.00156315	4.74578	5.02563	2.34037	6.43197
Arhgef3	0.00197391	0.00283039	4.15194	6.17195	4.3361	3.56981
Arhgef5	0.00293019	0.00371375	-3.90644	-0.825887	1.14725	-3.92622
Arid3b	8.13689e-06	0.000232594	-8.34299	2.4093	4.52372	-4.33014
Arid5b	0.00583743	0.00604326	-3.48852	1.26124	3.77603	-5.71515
Arl1	2.0941e-05	0.000291754	7.48689	5.11399	3.50521	3.04994
Arl11	0.0305782	0.0204886	2.51635	-0.815955	-2.82761	4.03244
Arl14ep	0.0332608	0.0218399	2.46725	5.34648	4.14634	2.29763
Arl2bp	0.00011317	0.000538516	6.11672	4.85453	3.20682	3.13337
Arl5c	0.0143701	0.0115348	-2.95666	2.79368	5.92069	-8.73623
Armcx1	0.00629282	0.00635412	-3.44365	-1.99446	2.03306	-16.3081
Armcx2	0.0155518	0.0122337	-2.91048	-0.410837	2.88282	-9.80598
Armcx3	0.00175772	0.00261971	-4.22497	-0.072306	3.20161	-9.67268
Arntl	0.0168306	0.0129728	-2.86436	3.65132	5.31211	-3.16189
Arpp21	0.00178803	0.0026466	-4.21418	7.44825	8.65578	-2.30943
Arrdc4	0.00926373	0.00833889	-3.21433	-0.310276	1.45272	-3.39402
Arsg	3.00074e-05	0.000319649	7.17873	1.2049	-0.294111	2.82648
Arvcf	0.0158155	0.0123945	2.90067	4.46668	3.16838	2.4594
Asah2	0.0645562	0.036722	-2.07668	-0.339674	1.08378	-2.68226
Asap2	0.00156261	0.00243008	4.29952	2.85941	0.675886	4.54261
Asb2	0.0708071	0.0394316	-2.02146	-1.61105	0.381251	-3.97871
Ascc1	7.16829e-05	0.000439334	6.46944	3.24226	1.88469	2.56253
Ash1l	4.22076e-05	0.000358448	-6.89486	6.1348	7.45554	-2.49794
Ash2l	0.000387696	0.00102833	5.22389	5.31949	4.28167	2.05313
Asns	0.00768993	0.00726799	3.32442	2.18014	-3.29072	44.3499
Asrgl1	6.93834e-05	0.00043446	6.49511	4.70518	3.39093	2.48673
Ass1	0.00325281	0.00398946	3.84231	1.65923	0.0288064	3.09604
Atad2	0.00257304	0.00339427	3.98668	7.60877	6.53819	2.10028
Atad3a	0.00126685	0.00209909	4.43369	4.16882	2.60359	2.95924
Atf1	0.000864821	0.00165601	4.68205	4.62705	3.45247	2.25727
Atf1-ps	4.81474e-05	0.000377409	6.7874	2.21866	0.513138	3.26147
Atf3	0.0048346	0.00526011	3.60166	-0.837429	-3.15464	4.98367
Atf4	0.0021081	0.00294556	4.11073	6.28878	4.94602	2.53636
Atf5	0.041335	0.0258113	2.34007	2.11338	0.447	3.17418
Atf6	7.49471e-07	0.000129474	10.8491	4.84876	3.12533	3.30219
Atf7ip	0.00035862	0.000973712	-5.2781	6.23862	7.52315	-2.43602
Atg10	0.000445248	0.00111829	5.12834	1.30597	0.0728155	2.3508
Atg4c	0.0234961	0.0166785	-2.66991	-1.63449	0.169708	-3.49235
Atg5	0.00098391	0.00180586	4.59748	4.34789	3.34286	2.00699
Atic	0.000132801	0.000579211	5.99608	6.48329	4.19604	4.88126
Atl1	0.0576866	0.0336378	-2.14357	0.193066	1.32814	-2.19629
Atl2	0.000759953	0.00153513	-4.76746	5.77347	7.21784	-2.72144
Atox1	0.00474321	0.00518184	3.61315	3.64813	2.36505	2.43358
Atp10a	0.000407313	0.00106121	-5.18971	3.75983	5.39123	-3.09813
Atp1a1	0.00105354	0.00187548	4.55293	7.3228	6.16198	2.23584
Atp23	0.00928963	0.00835255	3.21269	1.70581	0.604729	2.14516
Atp2a2	0.00464687	0.00510884	3.62553	6.20863	5.19967	2.01245
Atp5a1	0.000912769	0.00171396	4.64659	8.338	7.03753	2.46309
Atp5b	0.000162856	0.0006429	5.84432	8.86581	7.24703	3.07115
Atp5c1	0.000746337	0.00151996	4.77946	6.52137	5.19105	2.51459
Atp5c1-ps	0.002038	0.00288498	4.1319	0.781449	-0.61696	2.63611
Atp5d	0.000119338	0.000552903	6.07654	4.89071	3.36566	2.87797
Atp5e	0.000980902	0.00180481	4.59948	5.11767	3.50976	3.0481
Atp5f1	0.00113103	0.00196501	4.50687	6.82959	5.41535	2.6652
Atp5g1	8.00242e-05	0.000460329	6.38326	3.87893	2.06047	3.52705
Atp5g2	0.000417228	0.00107348	5.1731	1.20449	-0.36624	2.97056
Atp5g3	0.00092254	0.00172564	4.63961	6.10251	4.82605	2.42245
Atp5j	0.00265288	0.00345712	3.96777	4.94338	3.8649	2.11182
Atp5j2	0.00781026	0.00734566	3.31522	5.58	4.45786	2.17671
Atp5k	0.00267807	0.00348424	3.96193	4.60732	3.19363	2.66416
Atp5k-ps2	0.00885415	0.00806153	3.24102	0.888941	-0.487912	2.59701
Atp5mpl	0.00114276	0.00197861	4.5002	4.27466	2.92231	2.55328
Atp5o	0.0020345	0.0028819	4.13298	5.24032	4.05106	2.28035
Atp6v1f	0.00580339	0.00602058	3.49202	4.32351	3.26808	2.07834
Atp8a1	0.00167592	0.00254552	4.25511	6.89317	5.67798	2.3217
Atp8a2	0.0348179	0.0226273	2.44052	4.04347	0.540228	11.3392
Atp9a	0.0172013	0.0131918	2.85165	3.5618	1.66904	3.71345
Atpif1	0.00120237	0.00203235	4.46734	4.94074	3.47495	2.76215
Atraid	0.000947745	0.00176297	4.62196	3.05213	1.79314	2.39328
Atrnl1	0.0114327	0.00973126	-3.09058	1.73696	4.86541	-8.74495
Atxn10	6.37823e-05	0.000424123	6.56169	5.72737	4.47372	2.38444
Atxn7l1	1.5945e-06	0.000150959	-9.99661	3.88889	5.08157	-2.28576
Aunip	0.000109302	0.000528338	6.14314	1.59328	0.00574803	3.00535
Aurkb	0.00376431	0.00440167	3.75314	4.89434	3.68909	2.30577
Aven	0.000165612	0.000645812	5.83195	3.13157	1.37403	3.38121
Axdnd1	2.55471e-05	0.000307367	-7.31544	-0.271743	3.78385	-16.6286
B130006D01Rik	0.00178805	0.0026466	-4.21418	1.2116	2.66342	-2.73552
B2m	0.00237866	0.0032038	4.03543	8.07107	6.27973	3.46136
B3glct	0.000741131	0.00151324	4.78411	3.01006	1.62042	2.62013
B3gnt8	0.00690632	0.00675556	-3.38823	-1.18155	1.46391	-6.25694
B4galt1	0.00599408	0.00615583	3.47269	5.65208	4.23692	2.6669
B4galt5	0.00108332	0.00191221	4.53482	3.45848	1.62015	3.57594
B4gat1	0.00248769	0.00330693	4.00759	2.24614	1.2272	2.02643
B630019A10Rik	0.000445621	0.00111851	-5.12777	0.817167	3.77416	-7.76504
BC005561	0.019631	0.0145644	-2.77462	3.97036	5.12694	-2.22928
BC024063	0.012688	0.0105291	-3.0295	-2.17418	1.2986	-11.1023
BC028528	0.0686303	0.0385048	2.04015	-1.05756	-2.45625	2.63662
BC029722	0.0366171	0.0234854	2.41106	2.36723	1.30229	2.09207
BC048403	0.00310262	0.00386126	3.87129	0.868717	-0.190807	2.08424
BC055324	0.000236091	0.00077785	5.57394	3.78326	2.64891	2.1952
BC106179	0.021196	0.0154313	-2.72993	-0.494075	1.22439	-3.29087
BE692007	0.00147784	0.00233663	-4.33503	-0.271772	2.55042	-7.07234
Babam2	9.56429e-05	0.00049741	6.24524	3.56433	2.26217	2.46598
Bace1	0.00431351	0.00486904	3.67051	2.90596	1.02302	3.68826
Bach2	8.15595e-05	0.000461473	-6.36845	0.478189	4.24204	-13.5842
Bag1	6.42432e-05	0.000424123	6.55597	4.99256	3.43157	2.95058
Bag2	0.000436501	0.0011061	5.14198	2.6052	0.226415	5.20097
Bag3	0.00166749	0.00253851	4.2583	2.68351	-0.577392	9.5858
Bahcc1	0.00378967	0.00442221	-3.74906	-2.1858	2.61551	-27.883
Bak1	0.0053948	0.00568728	3.53575	4.27146	3.01332	2.39186
Banf1	8.46048e-05	0.000464864	6.33996	5.15448	3.50277	3.14206
Bank1	0.00144361	0.00229347	-4.34998	-0.492248	2.50317	-7.97462
Banp	0.00740594	0.00708043	-3.34674	3.32982	4.50343	-2.25576
Basp1	0.0104836	0.00913686	-3.14149	-0.134268	1.28818	-2.6804
Bax	0.00600949	0.00616608	3.47115	3.76112	2.63748	2.17895
Baz2a	7.76383e-05	0.00045415	-6.40688	5.78015	6.8655	-2.12189
Bcap29	9.82975e-05	0.000506574	6.22421	4.10154	2.33876	3.39351
Bcat1	0.00172928	0.00259577	4.23528	3.45528	0.856101	6.05941
Bcat2	0.000140401	0.000599207	-5.95445	3.25502	4.38869	-2.19415
Bckdha	0.000981731	0.00180481	4.59893	4.09856	2.7484	2.5494
Bckdk	0.00608627	0.00621825	3.46357	3.9889	2.77853	2.31396
Bcl11a	0.00239544	0.00322047	-4.03106	-0.618343	2.15598	-6.84155
Bcl2l1	0.00205106	0.00289412	-4.1279	3.76117	5.86711	-4.30478
Bcl2l14	0.0396126	0.0249911	2.36502	1.83225	-0.871889	6.51668
Bcl6	0.00741881	0.00708718	-3.34571	2.63665	5.69808	-8.34802
Bcl7c	0.000674483	0.00142778	4.84691	4.06699	2.55751	2.84707
Bcl9	0.000593171	0.00131669	-4.93314	2.12912	3.51421	-2.6119
Bcorl1	0.0691452	0.0387008	-2.03568	1.95404	2.97642	-2.03127
Bend3	0.00374983	0.00438732	3.75549	3.55363	2.28021	2.41734
Bhlhe41	0.023842	0.0168603	-2.6614	-1.92771	-0.801105	-2.18345
Bicdl1	0.059025	0.0342724	-2.12996	2.59607	4.36742	-3.41373
Bicra	0.0045852	0.00506657	-3.63359	2.61531	3.77922	-2.24063
Bid	0.000216036	0.000742735	5.6379	4.89508	3.05099	3.59028
Bin1	0.0947324	0.0495594	-1.84556	1.91154	3.09374	-2.26923
Bivm	1.50826e-05	0.000266974	7.77627	4.46232	2.06959	5.2515
Blmh	0.00131216	0.00215886	4.41111	5.74875	4.40944	2.53032
Bloc1s1	0.00174352	0.00260503	4.2301	3.21263	2.09958	2.16302
Bloc1s2-ps	0.000446917	0.00112105	5.12577	1.94682	0.397848	2.92609
Bloc1s4	0.00603183	0.0061833	3.46894	1.86768	0.771342	2.13811
Blvra	0.00644474	0.00645234	3.42942	3.00678	1.77813	2.34349
Bmf	0.00184448	0.00270733	4.19458	5.86373	3.91621	3.8571
Bmi1	0.000402909	0.0010553	5.19723	5.4222	3.90972	2.85302
Bola1	0.00075712	0.00153331	4.76994	1.93422	-0.465155	5.27575
Bola2	0.00144822	0.00229711	4.34795	3.36874	2.07007	2.46003
Bola3	0.00124218	0.00206856	4.44635	2.78014	1.30273	2.78447
Bop1	0.000475109	0.00116038	5.08384	5.02294	3.48155	2.91076
Borcs5	0.00952637	0.00850403	3.19785	2.11753	1.04773	2.09914
Borcs7	0.000915874	0.00171725	4.64437	1.76312	0.65401	2.15713
Bpnt1	0.00202721	0.00287362	4.13523	3.01573	1.21755	3.47781
Braf	0.0283858	0.0193226	-2.55974	3.99638	5.11496	-2.17134
Brca2	0.000444527	0.00111829	5.12946	5.48472	4.29362	2.28327
Bri3	0.00205573	0.00289855	4.12647	1.64127	0.447341	2.28774
Bri3bp	0.00759339	0.00720393	3.33191	4.41559	2.74488	3.18372
Brix1	0.00027375	0.000847119	5.4682	4.49745	3.23168	2.40456
Brms1	0.00120961	0.0020391	4.46347	3.19169	2.09348	2.1409
Brwd3	0.000516915	0.00121173	-5.02632	4.72346	5.84705	-2.17888
Bsg	0.00202232	0.00286772	4.13674	5.60914	4.42126	2.27818
Bsn	0.00552151	0.00579625	3.52183	2.06549	-0.241677	4.94909
Bst1	3.11539e-08	4.08974e-05	15.1811	5.69732	-1.06856	108.826
Btbd19	0.0172237	0.0132013	2.85089	2.00108	0.938073	2.08928
Btbd2	0.000594114	0.00131804	4.93207	3.60541	1.85433	3.36609
Btf3	3.75564e-05	0.000346228	6.99112	5.99464	4.33442	3.16065
Btg2	0.0110244	0.00947311	-3.11193	6.42591	7.46159	-2.05008
Btla	0.0553271	0.0325823	-2.16832	1.93457	3.82287	-3.702
Bub1b	0.0268314	0.0184702	2.59257	6.57283	5.46979	2.14807
Bzw1	0.00114625	0.00198278	4.49822	7.84189	6.61902	2.3341
Bzw2	7.77958e-05	0.00045415	6.40529	7.06493	4.63146	5.40193
C030006K11Rik	0.000320955	0.000917161	5.35577	2.29944	0.663176	3.10859
C030017G13Rik	0.00657091	0.00653691	-3.41787	1.04018	2.46434	-2.68359
C130051F05Rik	0.000790856	0.00156881	-4.74105	0.858455	2.24518	-2.61484
C130083A15Rik	0.000724564	0.00149168	-4.79914	0.208759	2.12819	-3.78274
C1qb	0.0774438	0.0423435	1.96767	3.56023	2.19675	2.57305
C1qbp	2.8582e-05	0.000312297	7.21988	4.79264	2.60043	4.57004
C1qtnf6	0.00663693	0.00658117	3.41191	-0.368461	-3.47496	8.6129
C230053D17Rik	0.00589485	0.00608369	-3.48267	-0.487211	1.75952	-4.74605
C230085N15Rik	1.3473e-05	0.000262415	-7.87767	4.32399	7.95394	-12.3801
C430019N01Rik	0.000331787	0.000936959	-5.33247	-1.02863	0.689748	-3.29066
C5ar1	0.00177456	0.00263783	4.21896	-1.06578	-4.5832	11.4512
C730045M19Rik	0.00804658	0.00751157	-3.29756	-0.245136	1.6667	-3.76288
C9orf72	0.000125727	0.000565107	-6.0372	0.890804	2.32592	-2.70404
CT010445.1	0.00521103	0.00554059	-3.55656	0.512556	2.02693	-2.85675
CT033749.1	0.00120514	0.00203416	4.46586	2.32967	1.00158	2.51072
CT485613.4	0.000130306	0.000574637	6.01031	4.75676	3.19426	2.95365
Cab39l	0.000491567	0.00117847	5.06058	4.08456	2.98392	2.14451
Cacna1d	0.0136604	0.0111247	2.98627	3.19404	0.7727	5.35668
Cacybp	0.00586195	0.00606073	3.48601	5.62952	4.48277	2.21414
Cad	2.67479e-05	0.00030971	7.27623	5.91623	3.70384	4.63443
Calcrl	0.000219785	0.000747994	-5.62548	1.10383	4.74483	-12.4753
Calm3	0.00312097	0.00387491	3.86767	6.75872	5.51789	2.36335
Calr	0.00147427	0.00233284	4.33657	6.91787	5.65018	2.40776
Calr-ps	0.00189638	0.00275573	4.17712	0.624596	-0.763189	2.61677
Camk2g	0.00700055	0.00680918	3.38017	5.67504	4.22744	2.72755
Canx	0.00200092	0.0028547	4.14341	7.80918	6.63799	2.25197
Capns1	0.00328106	0.00400514	3.83701	5.00626	3.85092	2.22736
Capzb	0.00611843	0.00624148	3.46042	5.25621	4.22479	2.04404
Card11	0.00339391	0.00410506	-3.81632	2.77571	4.64323	-3.64906
Card6	0.0730892	0.04047	-2.00245	1.43986	2.66797	-2.34261
Carhsp1	0.00610637	0.00623398	3.4616	4.66251	3.17672	2.8007
Carm1	4.20052e-05	0.000358448	6.8988	3.6562	2.20329	2.73759
Carmil2	0.012143	0.0101876	-3.05522	4.42353	6.09242	-3.17972
Casp3	0.0060609	0.00620157	3.46606	5.72483	4.11411	3.05406
Castor2	0.012963	0.0106926	-3.01694	0.740619	2.68721	-3.85463
Cbl	0.000494992	0.00118195	-5.05584	7.16696	8.55599	-2.61903
Cbr4	0.000413057	0.00106919	5.18003	2.90922	1.84515	2.09082
Cbx3-ps6	0.00316278	0.0039177	3.85951	5.818	4.72803	2.1287
Cby1	0.0140036	0.0113045	2.97176	3.17109	2.04059	2.18934
Ccdc102a	0.0850337	0.0455715	1.91122	0.562698	-0.729034	2.44822
Ccdc115	0.005732	0.00596085	3.49943	3.41679	2.25307	2.24034
Ccdc116	0.0386005	0.0244497	2.38018	0.0142092	-1.16816	2.26949
Ccdc124	0.00262458	0.00343614	3.97441	2.99683	1.63286	2.57393
Ccdc125	0.021653	0.0156768	2.7175	2.91301	1.64657	2.40566
Ccdc134	0.0455656	0.0279136	2.28283	5.07229	3.95901	2.16338
Ccdc162	0.0203422	0.0149429	2.75388	2.64318	1.47044	2.2544
Ccdc18	0.00840663	0.00776257	3.27166	5.65685	3.83753	3.52915
Ccdc186	0.00798947	0.00747641	-3.30178	3.45984	4.47864	-2.02623
Ccdc32	0.0125122	0.0104137	3.03767	2.74396	1.52878	2.32169
Ccdc58	0.00195232	0.00280957	4.15885	2.90789	1.49893	2.65544
Ccdc86	0.00113779	0.00197243	4.50302	3.00589	1.53433	2.77324
Ccdc88a	1.08234e-05	0.000252971	-8.07724	2.2199	5.065	-7.18554
Ccl25	0.000134977	0.000584215	-5.98391	2.9462	3.99513	-2.069
Ccl6	0.00474734	0.00518493	3.61263	2.77125	-0.8849	12.607
Ccl9	0.00065658	0.00140637	4.86491	1.78457	-2.29213	16.8737
Ccnb1	0.0198915	0.014707	2.76694	5.3526	4.27149	2.11566
Ccnb1-ps	0.0145501	0.011651	2.94938	4.07657	2.81789	2.39277
Ccnb2	0.0382789	0.0242808	2.38508	4.95713	3.8982	2.08338
Ccnd1	0.00250061	0.00332188	4.00438	3.39965	0.372839	8.15003
Ccnd2	0.0551801	0.0325243	-2.16989	2.70797	5.11562	-5.30611
Ccnd3	0.00933874	0.00838173	-3.20958	6.66646	8.14834	-2.79311
Ccnl1	0.00154864	0.00241494	-4.30523	6.08929	7.0923	-2.00418
Ccnq	0.00190355	0.00276239	4.17474	3.33928	2.16132	2.26257
Ccnyl1	0.000947338	0.00176297	4.62224	2.31026	1.07976	2.34647
Ccr7	0.0328939	0.021646	-2.47373	1.51006	3.80128	-4.89468
Ccr9	0.000750297	0.0015249	-4.77595	4.04208	8.70516	-25.3354
Ccrl2	0.0647495	0.0368003	2.0749	-0.769832	-2.776	4.01713
Cct2	7.72193e-05	0.00045415	6.41111	7.41913	5.98505	2.7021
Cct3	0.00112678	0.00196018	4.50931	6.83467	5.60438	2.34614
Cct3-ps1	0.000186507	0.000687091	5.74473	1.36793	-0.366321	3.32708
Cct4	0.000823766	0.00161316	4.7141	6.84196	5.61432	2.34183
Cct5	1.41189e-05	0.000266964	7.83548	7.89229	6.06158	3.55712
Cct6a	5.95124e-05	0.000409814	6.61683	7.05392	5.3835	3.18306
Cct7	0.00160076	0.0024643	4.2842	6.8936	5.52603	2.58034
Cct8	0.000188642	0.000689676	5.73642	7.73948	5.69271	4.13182
Cd160	0.0146094	0.0116844	2.947	2.64759	0.128183	5.73347
Cd180	0.0165457	0.0128051	-2.87432	-0.75938	0.745868	-2.83873
Cd19	0.00301326	0.00378086	-3.88924	-1.12332	1.96378	-8.49789
Cd200	0.00115249	0.00198566	-4.49471	-0.261713	2.22545	-5.60673
Cd200r1	0.0132972	0.0108824	-3.00204	-0.306424	1.25444	-2.95031
Cd22	0.0396192	0.0249913	-2.36492	-0.0382693	1.72067	-3.38449
Cd226	0.000963085	0.00178233	-4.61146	0.028334	3.28605	-9.56464
Cd24a	0.00342346	0.00412699	3.81102	7.35164	6.14282	2.31148
Cd274	0.0223568	0.0160722	-2.69887	2.20563	3.20784	-2.00306
Cd28	0.0781469	0.0426406	-1.96223	6.29685	7.59002	-2.45066
Cd2bp2	0.00262179	0.00343614	3.97507	5.90536	4.75793	2.21518
Cd302	0.0553957	0.032613	2.16758	-0.804466	-2.8156	4.03099
Cd320	2.47295e-05	0.000307367	7.34329	1.79803	0.223781	2.97781
Cd36	0.0777691	0.0424961	1.96514	0.976391	-0.614592	3.01255
Cd3eap	0.000899038	0.0016978	4.65654	3.29731	1.61821	3.20228
Cd4	0.0176956	0.013491	-2.83513	4.17897	7.92685	-13.4346
Cd40	0.016324	0.0126805	-2.8822	-2.0322	0.233423	-4.80862
Cd46	1.58022e-06	0.000150959	-10.0064	1.55997	3.23238	-3.18747
Cd5	0.0179296	0.0136233	-2.82747	3.97731	5.95923	-3.9502
Cd52	0.0106971	0.00925591	-3.12964	2.3168	4.59674	-4.85656
Cd5l	0.060255	0.0348288	2.11771	2.36529	-0.488254	7.22772
Cd6	0.0389288	0.0246262	-2.37522	4.585	6.07093	-2.80098
Cd63	0.0365433	0.0234532	2.41224	0.220599	-0.918594	2.20258
Cd68	0.017501	0.0133674	2.84158	2.38258	0.988497	2.62822
Cd69	0.0040866	0.00467826	-3.70324	2.5905	5.56038	-7.83467
Cd79b	0.035493	0.0229758	-2.42929	0.082576	1.97103	-3.70238
Cd80	0.0175516	0.0133957	-2.8399	-1.4899	0.151405	-3.11948
Cd81	0.000995753	0.00181323	4.58967	5.70176	4.42245	2.42722
Cd82	0.0230108	0.0164235	2.68207	5.67338	3.10301	5.93958
Cd83	0.049515	0.0298271	-2.23389	0.397743	1.78599	-2.6176
Cd84	0.00159861	0.0024629	-4.28505	5.16767	6.22444	-2.08027
Cdc14b	0.00329905	0.00402222	3.83366	3.8431	2.48081	2.57092
Cdc20	0.00928365	0.00834926	3.21307	4.96576	3.68711	2.42612
Cdc25a	0.0115825	0.00983147	3.08294	5.18882	4.14074	2.06777
Cdc25b	0.0069129	0.00675702	3.38767	5.31992	3.97775	2.53531
Cdc34	0.00740081	0.00707993	3.34715	4.20033	2.92033	2.42839
Cdc34b	0.00672743	0.00663943	3.40385	0.542675	-0.876297	2.67395
Cdc42ep3	0.012088	0.0101542	-3.05789	0.221453	2.87434	-6.28926
Cdc42ep4	3.38794e-07	8.41338e-05	11.8123	4.92792	2.04563	7.37316
Cdc45	0.00142175	0.00227418	4.35973	4.68542	3.08972	3.02242
Cdc6	0.000926332	0.00173043	4.63692	5.05967	3.61979	2.71299
Cdca2	0.0088374	0.00804996	3.24214	5.20203	4.08757	2.16514
Cdca5	0.00076505	0.00153992	4.76302	4.28733	2.85834	2.6926
Cdca8	0.00221202	0.00304834	4.08066	4.63837	3.47644	2.23755
Cdh24	0.0281505	0.0192085	-2.56459	2.20654	4.09026	-3.69026
Cdk1	0.0110426	0.00948056	3.11096	5.66647	4.53745	2.18711
Cdk17	1.49305e-05	0.000266964	-7.78534	5.11256	6.65644	-2.91577
Cdk20	1.16655e-06	0.000144627	-10.3424	1.34144	3.63031	-4.88672
Cdk2ap1	0.000807065	0.00158986	4.72763	4.64892	2.9727	3.1959
Cdk4	6.40075e-05	0.000424123	6.55889	6.80898	4.95412	3.61716
Cdk5rap2	0.0178813	0.0136082	2.82904	6.97738	5.12973	3.59913
Cdkl5	0.00665733	0.00659313	-3.41009	-0.265013	2.30729	-5.94756
Cdkn2aipnl	0.0101625	0.00892063	3.15979	5.91797	4.9172	2.00106
Cdr2	0.0552702	0.0325536	2.16893	2.7766	1.55053	2.33929
Cds1	0.00734794	0.00704362	-3.3514	-2.96396	-0.199974	-6.79273
Cdt1	8.32743e-05	0.000461473	6.35227	4.66436	2.80241	3.63497
Cdv3	0.00159775	0.00246253	4.2854	7.7354	6.34435	2.62268
Cdv3-ps	0.000304672	0.000897378	5.39243	4.13954	1.90065	4.72033
Cebpzos	0.000707149	0.00146876	4.81534	1.37812	-0.520624	3.72888
Celsr1	0.000993673	0.00181294	4.59103	6.12227	4.1629	3.88891
Celsr2	0.0589878	0.0342606	-2.13034	1.06088	3.20091	-4.40772
Cenpb	2.66786e-05	0.00030971	7.27844	5.73594	3.93156	3.4928
Cenph	4.40526e-05	0.000359155	6.85981	2.79921	1.36873	2.69536
Cenpm	6.67533e-05	0.000431976	6.52562	2.51876	0.567034	3.86836
Cenpn	0.00349131	0.00417207	3.79904	3.26447	2.24986	2.02035
Cenps	0.000158169	0.000634806	5.86591	2.47455	0.967285	2.8427
Cenpu	5.85521e-05	0.00040751	6.62982	2.25051	1.12903	2.1757
Cenpv	4.75155e-07	9.70057e-05	11.3932	3.72224	-0.855774	23.8846
Cenpw	0.000531724	0.00123079	5.00712	3.20091	1.50842	3.23214
Cenpx	0.000223093	0.000753219	5.61469	2.90516	1.10725	3.47715
Cep170b	0.00117335	0.00200867	-4.48311	-1.3068	0.583428	-3.70693
Cep83os	0.000464651	0.00114038	5.09908	3.21864	1.69623	2.8727
Cep97	9.98233e-05	0.000507266	-6.21241	6.02684	7.06865	-2.05881
Cercam	0.000117897	0.000549817	6.08572	1.12095	-0.898494	4.05429
Cetn2	0.00131737	0.00216435	4.40856	4.14747	2.94129	2.30727
Cetn3	0.000853229	0.00164433	4.69093	4.99814	3.85191	2.21335
Cfap298	0.0020497	0.00289412	4.12831	2.81936	1.28992	2.88674
Cfl1	0.00354289	0.00421762	3.79009	8.51633	7.357	2.23354
Cflar	0.000673422	0.00142706	-4.84796	5.45225	6.58468	-2.19227
Cgrrf1	0.0518407	0.030928	2.2068	1.38568	0.275878	2.15816
Chaf1a	0.000640276	0.00138112	4.88176	5.27181	3.93372	2.52817
Chaf1b	0.00133175	0.00218116	4.4016	4.47323	2.71717	3.37776
Chchd1	0.00318888	0.00393796	3.85447	4.60774	3.17911	2.69191
Chchd10	0.00173019	0.00259616	4.23495	1.18567	-1.30937	5.63745
Chchd2	0.00143067	0.00228203	4.35573	6.31337	5.04009	2.41711
Chchd3	0.000179494	0.000674164	5.77278	6.84624	4.87483	3.92152
Chchd4	0.0106961	0.00925591	3.12969	3.18957	1.87206	2.49237
Chd3	1.70748e-06	0.000150959	-9.92217	1.71163	6.1446	-21.6001
Chd7	0.0945054	0.0494536	1.84702	4.88897	3.66311	2.33895
Chek1	0.000268417	0.000838452	5.48219	4.544	3.13151	2.66198
Chic1	0.00338527	0.00409711	-3.81788	-1.98296	0.533511	-5.7218
Chil1	0.0801195	0.043519	1.9472	-1.71241	-4.07872	5.15622
Chil3	0.0332068	0.0218158	2.4682	1.74119	-1.82047	11.8077
Chmp4b	0.00272002	0.00352267	3.95233	5.0967	3.7052	2.62352
Chmp6	0.0173033	0.0132462	2.8482	3.37548	2.36384	2.01621
Chn2	0.0304826	0.0204383	-2.51817	-1.25414	1.11604	-5.17007
Chpf	0.0476853	0.028911	2.25607	2.22763	0.800821	2.68852
Chrac1	0.000137521	0.000591359	5.96994	4.16186	2.50098	3.16208
Chrnb1	0.000507737	0.00119799	-5.03851	-2.91545	0.581066	-11.2864
Chst10	0.0234982	0.0166785	-2.66986	3.43518	4.49339	-2.08234
Chst3	0.00438285	0.00491939	-3.66086	-2.28933	0.534745	-7.08159
Chtf18	7.75025e-06	0.000229745	8.389	3.61384	2.20718	2.65123
Ciao2a	0.00049809	0.0011865	5.05158	5.00903	3.44168	2.96359
Ciita	0.000921979	0.00172554	-4.64001	1.11589	3.34287	-4.68153
Cirbp	9.25152e-05	0.000489668	6.27083	5.39004	3.45261	3.83021
Cisd1	0.00862978	0.00790251	3.25618	3.04732	1.71689	2.51478
Cisd3	0.0137174	0.0111522	2.98384	0.200934	-1.72425	3.79787
Cish	0.0212815	0.0154756	-2.72758	-0.731727	1.37096	-4.29508
Cks1b	5.33377e-05	0.000395873	6.70463	4.92906	2.73617	4.57221
Cks2	0.00583929	0.00604361	3.48833	3.55159	2.52476	2.03754
Clcf1	0.0317281	0.0210567	-2.4948	-0.619246	1.52344	-4.41584
Clcn6	0.0001086	0.000526866	-6.14805	3.0924	4.32483	-2.34964
Clec2d	0.000817381	0.00160461	-4.71924	2.66538	5.592	-7.60326
Clic4	0.0111698	0.0095691	3.10423	5.95479	4.50087	2.73952
Clic5	0.0422331	0.0262731	-2.32745	-0.817639	1.23169	-4.13914
Clk3	5.70104e-06	0.000216493	-8.68378	5.60388	7.2684	-3.17008
Cln5	0.00559968	0.00585356	3.51341	3.99604	2.6474	2.54672
Cln6	0.000462927	0.00113822	5.10163	3.11	1.74061	2.58362
Clns1a	0.00176549	0.00262926	4.22219	5.29779	4.10844	2.28051
Clpp	0.00144611	0.00229468	4.34888	2.81418	1.46634	2.54531
Clstn1	0.034618	0.0225268	2.44389	3.38355	1.42391	3.88965
Clta	0.000309309	0.000902798	5.38178	5.32522	4.06376	2.39738
Cltb	0.00371085	0.0043584	3.76185	3.06006	1.87385	2.27553
Cluh	0.000220015	0.000747994	5.62472	4.85749	3.52277	2.52227
Cmah	0.018075	0.0136978	-2.82276	4.63755	5.7676	-2.18867
Cmc1	6.38487e-05	0.000424123	6.56086	2.43241	0.803716	3.09232
Cmss1	0.000523665	0.00122035	5.0175	2.82152	0.598964	4.66719
Cmtm4	0.00120291	0.00203235	-4.46705	1.26234	3.32284	-4.17129
Cmya5	0.0111928	0.00957844	-3.10303	1.2732	2.63248	-2.56558
Cnbp	0.000422347	0.00108196	5.16469	8.13524	6.64296	2.81333
Cndp2	0.00281268	0.00360634	3.93165	3.72881	2.27669	2.7361
Cnih1	0.000576113	0.00129693	4.95283	4.63599	3.01794	3.0696
Cnot9	0.000485747	0.00116997	5.06871	5.51634	4.13921	2.5975
Cnpy2	0.00103008	0.00185197	4.56758	4.34433	2.76864	2.98076
Cntln	0.0321959	0.0212853	-2.48626	-0.0710674	2.22781	-4.92076
Coa5	0.00633439	0.00637827	3.43972	5.61261	4.59499	2.02457
Coa6	0.00917129	0.00827255	3.22025	2.53245	1.39877	2.19418
Cog7	0.000289129	0.000873903	5.42943	2.5401	1.48106	2.08355
Col1a2	0.0290177	0.0196623	2.5469	4.06489	-0.131778	18.3367
Col27a1	0.0293701	0.0198566	2.53986	5.11834	2.46542	6.28942
Commd1	0.00534302	0.00564467	3.54154	3.96316	2.83354	2.18801
Commd10	2.68929e-05	0.00030971	7.27163	3.12146	1.85395	2.40746
Commd5	0.00741538	0.00708718	3.34598	2.88551	1.54588	2.53086
Commd9	0.000499497	0.00118914	5.04966	2.44263	1.23653	2.30713
Comt	0.00420741	0.00478325	3.68558	3.52011	1.9593	2.95018
Comtd1	0.00344195	0.00413506	3.80773	1.69238	-0.420269	4.32485
Cops2	0.00212069	0.00295657	4.107	5.77679	4.73552	2.05804
Cops7a	0.000237575	0.000779392	5.56944	3.59253	2.40382	2.2795
Cops9	0.000881427	0.0016781	4.66954	4.25899	2.85976	2.6376
Copz1	0.00174378	0.00260503	4.23	5.37655	4.30506	2.10161
Coq2	0.00142745	0.00227871	4.35718	3.76654	2.58482	2.26848
Coq3	0.0131168	0.0107775	3.01004	2.41972	1.13079	2.44347
Coq4	0.00981485	0.0086932	3.18028	1.31299	0.311121	2.00259
Coq7	0.0011125	0.00194729	4.51757	2.50335	1.18569	2.49263
Coq9	0.00180462	0.00266457	4.20835	3.51358	2.5077	2.00817
Coro1c	0.000552368	0.00126135	4.9813	5.53019	4.25636	2.41802
Coro2a	0.000750096	0.0015249	4.77612	5.53244	1.76973	13.5734
Cotl1	0.0284324	0.0193416	2.55878	5.48116	4.00388	2.78424
Cox14	0.000190833	0.000693241	5.72799	3.6849	2.03838	3.13077
Cox4i1	0.000426795	0.00109022	5.15747	6.74292	5.18199	2.95044
Cox5a	0.000706098	0.00146811	4.81634	4.75792	3.45585	2.46583
Cox5b	0.000564309	0.00127472	4.96682	3.92802	2.52721	2.6405
Cox6a1	0.00198979	0.00284588	4.14691	5.23628	3.73757	2.8259
Cox6b1	0.00100405	0.00182416	4.58426	5.62663	4.26484	2.57005
Cox6c	0.000220068	0.000747994	5.62455	6.59844	4.7505	3.59985
Cox6c2	0.000686791	0.00143964	4.83483	3.4448	1.36571	4.22539
Cox7a2	0.0095291	0.00850456	3.19768	5.45129	4.23115	2.32969
Cox7a2l	0.000883867	0.00168194	4.66772	6.60091	5.33795	2.39988
Cox7b	0.000556481	0.0012662	4.97627	6.02444	4.31809	3.26334
Cox7c	0.00177116	0.00263573	4.22017	3.85205	2.60144	2.37941
Cox8a	0.00103184	0.00185378	4.56647	5.3539	3.6999	3.14703
Cpm	0.0191052	0.0142798	2.79045	2.17772	0.850321	2.5095
Cpsf1	5.92382e-05	0.000408634	6.62052	5.8175	4.80175	2.02196
Cpt1a	0.000514039	0.00120855	5.03011	6.15489	4.52286	3.09949
Cr2	0.010632	0.00922225	-3.13323	-1.34341	1.75578	-8.56941
Crebl2	0.00138109	0.00223693	-4.37829	2.04919	3.16236	-2.1632
Creg1	0.0130271	0.0107344	3.01405	3.3062	2.04247	2.40114
Creld2	0.0108653	0.00936713	3.12047	3.15545	2.04894	2.15324
Crim1	0.00595941	0.00613279	-3.47616	0.140944	2.23908	-4.28156
Crip1	0.00129042	0.00212749	4.42184	6.57543	4.02595	5.85424
Crip2	0.0198436	0.014677	2.76835	0.0714799	-1.47222	2.91541
Crls1	0.000781261	0.00156017	4.74913	3.64299	2.34373	2.46102
Crtap	0.000159144	0.000636791	5.86136	1.85257	0.0856112	3.40335
Crybg3	0.0858822	0.0459148	-1.9052	0.181467	1.29238	-2.15982
Cryl1	7.99436e-05	0.000460329	6.38404	2.89155	0.728737	4.47786
Cryz	0.00312035	0.00387491	3.8678	1.44988	-0.565337	4.04241
Csnk2b	0.00247329	0.00329344	4.01119	4.71011	3.49615	2.31974
Csrp1	0.0104613	0.00912341	3.14274	6.15379	5.1187	2.04925
Cstb	0.00355411	0.00422552	3.78816	3.00441	1.89994	2.15021
Ctnnbl1	0.00107253	0.0018982	4.54132	4.92969	3.83204	2.14007
Ctps	0.0239561	0.0169141	2.65862	4.37258	3.10125	2.41383
Ctsb	0.000636707	0.00137755	4.88551	6.9361	5.2781	3.15578
Ctse	0.0625419	0.0358431	2.09556	5.04974	2.84152	4.62105
Ctsl	1.18999e-05	0.000257752	-7.99036	4.39149	7.60006	-9.24433
Ctsz	0.000819397	0.00160619	4.71761	4.81368	3.42085	2.62594
Ctu1	0.000479199	0.00116647	5.07798	2.52951	1.18372	2.54169
Cuedc2	0.000479792	0.00116669	5.07714	3.53703	2.36628	2.25129
Cul9	0.000629849	0.00136873	-4.89278	-0.439498	1.85604	-4.90938
Cuta	0.00411725	0.00470362	3.69871	2.76329	1.6436	2.173
Cwc15	0.000321545	0.000917161	5.35448	5.14005	3.95736	2.26999
Cxadr	0.0351992	0.0228154	2.43415	3.59788	1.54206	4.1578
Cxcr3	0.00179545	0.00265398	-4.21157	-2.41616	0.138244	-5.87423
Cxcr5	0.0624507	0.0358166	-2.09643	-1.46634	-0.00984595	-2.7444
Cxcr6	0.0134729	0.0110058	-2.99436	-1.14539	2.10658	-9.52664
Cxxc5	0.00672736	0.00663943	3.40385	4.51087	3.15204	2.56477
Cyb561a3	0.00262241	0.00343614	-3.97492	1.30167	2.45073	-2.2177
Cyb5r3	0.000616749	0.00135017	4.9069	3.78877	2.08342	3.2611
Cyba	0.0305268	0.0204576	2.51733	4.63197	3.60439	2.03859
Cyc1	0.000866031	0.00165753	4.68113	5.05886	3.60758	2.73451
Cycs	0.00501369	0.00539427	3.57976	4.50856	3.35706	2.22146
Cyp20a1	0.00105553	0.00187667	4.5517	1.90062	0.59825	2.46634
Cyp27a1	0.0300498	0.0202198	-2.52652	-1.31364	0.0538202	-2.58017
Cyp51	8.06288e-05	0.000461473	6.37739	4.05637	2.58073	2.78107
Cysltr2	0.00678353	0.00668152	-3.39891	-0.837005	2.48781	-10.0201
Cyth4	0.000307622	0.000901033	5.38563	4.6493	3.41737	2.34882
D130019J16Rik	4.89013e-06	0.000209034	-8.83408	4.6647	7.53932	-7.33407
D130040H23Rik	0.00538534	0.00568485	-3.53681	1.25867	2.56801	-2.47827
D130062J10Rik	0.00273381	0.00353707	-3.9492	-1.08576	0.46718	-2.93415
D230049E03Rik	0.00440606	0.00493425	-3.65767	0.903334	2.31253	-2.6559
D330041H03Rik	5.09467e-05	0.00038557	-6.74163	2.72318	3.87027	-2.21467
D530018E20Rik	0.00143606	0.00228888	-4.35333	0.698972	1.97137	-2.41563
D5Ertd605e	0.000279245	0.000858534	5.45408	1.76056	-0.408947	4.49868
D730003I15Rik	0.026087	0.0180894	-2.60897	-0.0780382	1.04703	-2.18112
D930048N14Rik	0.00287638	0.00367132	-3.91785	-1.14743	1.19395	-5.06785
D9Wsu149	0.00111108	0.00194565	4.51841	1.25278	0.0743584	2.2633
Dancr	0.0183901	0.0138774	2.81268	2.29397	0.793809	2.82875
Dap	0.0868967	0.0463456	1.89808	4.00408	2.0161	3.96682
Dars	1.4696e-05	0.000266964	7.79952	6.70851	4.94319	3.39949
Dazap2	0.000153016	0.000625497	5.89044	6.64968	5.00991	3.11616
Dbi	0.00241544	0.00323579	4.02589	3.96785	2.64302	2.50503
Dbn1	0.00128889	0.00212674	4.4226	0.197986	-3.30088	11.3048
Dclk2	0.0449269	0.0276031	2.29114	6.45166	5.03092	2.67723
Dclre1a	0.000610464	0.00134349	4.91379	2.36698	0.675453	3.22997
Dclre1c	4.63412e-06	0.000209034	-8.88724	3.69412	5.33519	-3.11898
Dctn3	0.00101525	0.00183611	4.57703	3.08989	1.89103	2.29558
Dctpp1	0.000251544	0.000807977	5.5285	4.2323	2.09472	4.40023
Ddb1	0.000165386	0.000645812	5.83295	7.74896	6.44776	2.46433
Ddhd2	0.00115164	0.00198566	-4.49519	2.51453	3.94887	-2.70259
Ddit4	2.43315e-05	0.000305941	7.35722	6.67138	3.96916	6.50807
Ddost	0.000411385	0.00106626	5.18284	5.21339	3.5678	3.12875
Ddrgk1	5.39244e-05	0.000397309	6.69583	3.60575	2.36051	2.37059
Ddt	0.0005302	0.00123074	5.00907	2.30506	0.837198	2.76612
Ddx1	0.011672	0.00987997	3.07843	5.3986	4.26789	2.18967
Ddx18	6.84387e-05	0.00043417	6.50592	4.17897	2.83795	2.5333
Ddx19a	0.000905793	0.00170489	4.65163	5.44494	3.73905	3.26231
Ddx19b	0.00756256	0.00718521	3.33432	5.24211	4.18742	2.07727
Ddx21	0.000427489	0.00109022	5.15635	6.93472	5.24806	3.21909
Ddx27	0.000113588	0.000539858	6.11393	5.10211	3.81624	2.43829
Ddx49	0.00077412	0.00155032	4.75521	4.09274	2.99955	2.13345
Ddx56	0.0127691	0.0105766	3.02577	4.13302	3.04909	2.1198
Ddx59	0.00638985	0.0064146	3.43452	2.61023	1.52281	2.12494
Ddx60	0.0351457	0.0227881	-2.43504	1.10895	3.3517	-4.73299
Def8	0.000123262	0.000559727	6.05212	3.74813	1.86838	3.68011
Dennd1c	0.00112137	0.00195506	-4.51243	3.30477	5.2102	-3.74622
Dennd2a	0.0150566	0.0119305	2.92938	-0.486463	-2.73512	4.75241
Dennd2d	0.0011549	0.00198822	4.49336	6.8941	4.79427	4.28658
Dennd3	0.0925164	0.048637	1.85999	3.50499	1.8538	3.14093
Dennd5a	0.0734134	0.0406035	-1.99979	2.5651	3.72821	-2.23939
Denr	0.000753816	0.00152971	4.77284	4.27253	3.20279	2.09905
Deptor	0.00708805	0.0068674	3.37279	3.41752	0.988988	5.38346
Desi1	0.000198722	0.000710087	5.69848	7.44509	5.39443	4.14294
Dgka	0.00638642	0.00641278	-3.43484	5.6059	6.95164	-2.54161
Dgke	1.52409e-05	0.000266974	-7.76694	4.44798	6.98643	-5.80966
Dglucy	0.000151235	0.000621894	5.89912	3.1022	1.26441	3.57462
Dhdh	0.00492598	0.00533118	3.59038	0.200716	-1.22608	2.68848
Dhfr	1.30928e-05	0.00026204	7.90354	5.15687	3.12494	4.08952
Dhrs13	0.0317689	0.0210697	2.49405	2.08278	1.0479	2.04895
Dhrs3	5.25988e-06	0.000210164	-8.76242	2.00756	5.76028	-13.4798
Dhrs4	0.0133382	0.0109115	3.00024	2.83349	1.62982	2.30325
Dhx29	0.00773213	0.00729054	3.32117	4.20983	3.20282	2.00974
Dhx33	0.00503553	0.00540752	3.57715	4.42072	3.4003	2.02851
Diaph3	0.000578741	0.00130064	4.94976	5.53414	4.05432	2.78914
Dirc2	0.0015353	0.00240074	-4.31074	2.31354	3.81386	-2.82904
Dis3	0.00759255	0.00720393	3.33197	5.29291	4.12134	2.25257
Dkc1	0.000339416	0.000949728	5.31655	6.02712	4.22894	3.47782
Dkkl1	0.00786535	0.00738112	3.31105	-0.669197	-3.16936	5.65749
Dlat	0.00102547	0.00184786	4.5705	4.34936	3.29816	2.07225
Dlg4	0.00151375	0.00237451	-4.31973	3.21539	4.85005	-3.10513
Dlgap5	0.00125745	0.00208662	4.43848	5.96014	4.63703	2.50205
Dnah8	0.000203053	0.000717726	-5.68281	5.49596	8.12808	-6.19937
Dnaja3	0.0160883	0.0125465	2.89068	3.97745	2.954	2.03277
Dnajc19-ps	0.000434553	0.00110257	5.14506	2.87954	1.08474	3.46969
Dnajc2	0.00223227	0.00306669	4.07498	5.26386	4.2535	2.01442
Dnajc27	0.0106292	0.00922225	3.13338	3.45912	2.29513	2.24076
Dnajc6	0.0112168	0.00959072	-3.10177	1.20237	5.14666	-15.3939
Dnajc9	0.000384151	0.00102227	5.23026	6.27518	4.4822	3.4653
Dnal4	6.50308e-05	0.000426249	6.54631	3.03936	1.52739	2.85199
Dnase1l2	0.00137948	0.00223628	-4.37903	-0.676508	0.691864	-2.58179
Dnase1l3	0.0797178	0.0433219	-1.95023	-1.30105	0.583676	-3.69284
Dnase2a	0.0018524	0.00271293	4.19189	2.2498	1.20704	2.06018
Dnmt1	0.000103391	0.00051544	6.18554	7.70468	6.51924	2.27433
Dnmt3b	0.00041218	0.00106762	5.1815	3.11228	1.02587	4.24692
Dock2	0.00233705	0.00316492	-4.0464	6.73653	7.80481	-2.09694
Dock5	0.0307635	0.0205781	-2.51282	0.362993	2.28325	-3.7849
Dohh	0.0109336	0.00941542	3.11679	3.33315	2.17333	2.23431
Dop1b	0.0066717	0.00660411	-3.4088	2.31994	4.17988	-3.62991
Dph1	0.000141725	0.000603423	5.94745	2.82589	0.738944	4.24848
Dph3	0.00123929	0.00206722	4.44784	3.83827	2.21672	3.07707
Dpp4	6.70049e-05	0.000432196	6.52264	7.54773	5.24308	4.94048
Dpy19l1	0.0156252	0.0122817	2.90774	4.06786	2.84386	2.33592
Dpy30	0.00151218	0.00237392	4.3204	3.75946	2.41999	2.53059
Drap1	3.16713e-05	0.000325169	7.13329	4.8269	2.93132	3.72071
Drg2	0.000181821	0.000678981	5.76334	4.22083	3.12814	2.1327
Drosha	0.00951667	0.00849919	3.19845	5.50838	4.13479	2.59114
Dsel	0.0605987	0.034997	-2.11433	-0.255954	2.07693	-5.0381
Dsp	0.00886086	0.00806579	-3.24057	-0.581952	2.50237	-8.48148
Dstyk	0.000171723	0.00065587	-5.80527	0.179754	2.64023	-5.50398
Dtd1	0.0722812	0.0401282	2.00912	1.92622	0.649199	2.42339
Dtd2	7.28495e-05	0.000441917	6.45675	2.36714	0.421222	3.85282
Dtl	0.000513658	0.00120837	5.03062	6.31277	4.71238	3.03225
Dtnbp1	0.00199044	0.00284588	4.14671	3.42772	2.22191	2.30667
Dtwd1	0.000843224	0.00163275	4.6987	1.97168	0.791162	2.26658
Dtx1	3.9807e-05	0.000352334	6.94302	6.96236	1.96215	32.0045
Dtx4	9.96712e-06	0.000242961	8.15334	2.84602	0.0547453	6.9224
Dubr	0.00212958	0.00296688	-4.10439	-0.551894	2.72749	-9.70943
Dus2	0.00826327	0.00766403	3.28184	3.08447	1.85456	2.34552
Dus4l	0.00966209	0.00859814	3.18952	1.54996	0.453174	2.13878
Dusp10	0.00343786	0.00413506	3.80846	6.25289	4.91948	2.51998
Dusp16	0.0942471	0.049357	-1.84869	1.78867	2.89146	-2.14769
Dusp22	0.0736612	0.040718	1.99777	2.01512	0.870638	2.21066
Dusp28	0.000356469	0.000973712	5.2823	1.90547	0.438397	2.7646
Dusp3	0.0392652	0.0248035	2.37018	1.25979	-0.405768	3.17236
Dusp4	0.0949344	0.0496454	1.84426	3.84574	2.26544	2.99032
Dusp9	7.49062e-05	0.000444628	6.43491	1.65914	-3.8156	44.4696
Dut	0.0022642	0.00309475	4.06612	6.11727	4.54549	2.97272
Dynlrb1	0.00755165	0.00717657	3.33518	4.16334	3.16021	2.00434
Dynlt1-ps1	1.71628e-05	0.00027387	7.66138	5.56595	3.61796	3.85835
Dynlt1b	3.28767e-05	0.000329043	7.10196	5.54059	3.48844	4.14724
Dyrk3	0.00308135	0.00384403	3.87552	0.982001	-1.46798	5.4641
E030022I16Rik	0.000762808	0.00153774	-4.76497	2.52264	3.73076	-2.31035
E2f1	0.00237012	0.00319555	4.03766	3.22881	1.7976	2.69673
E2f2	0.000342383	0.00095601	-5.31046	4.87652	6.37695	-2.82927
E2f3	0.00532405	0.00562912	3.54367	4.31285	3.23053	2.11743
E2f6	0.00164923	0.00251552	4.26528	4.05561	2.84334	2.31702
E330020D12Rik	0.00398189	0.00459257	-3.71899	-0.481394	1.37036	-3.60939
E330034L11Rik	0.00258546	0.00340733	-3.9837	0.0141822	1.27207	-2.39145
E430014B02Rik	1.49543e-05	0.000266964	-7.78391	3.40497	7.02678	-12.3104
Ebag9	0.00145848	0.00231062	4.34344	3.08719	1.9905	2.13864
Ebf1	0.0788352	0.0429153	-1.95694	-0.448762	0.938334	-2.61552
Ebna1bp2	0.000179657	0.000674164	5.77212	5.11583	3.61247	2.83502
Ecd	0.000984799	0.00180586	4.59689	5.21283	3.89977	2.48468
Echs1	0.000350729	0.000968426	5.29363	4.44954	3.0651	2.6107
Eci2	0.00161638	0.00247683	4.27804	5.07108	4.03248	2.05423
Ecsit	0.0020726	0.00291441	4.12136	3.14156	1.94471	2.2924
Eef1a1	7.4297e-05	0.000443058	6.44131	11.7034	9.87924	3.54087
Eef1akmt1	0.00672374	0.00663908	3.40418	2.89881	1.6304	2.40895
Eef1akmt4	0.0110705	0.00949423	3.10948	1.87981	0.309848	2.96897
Eef1b2	2.52512e-05	0.000307367	7.32541	8.109	6.03184	4.21974
Eef1d	1.27556e-05	0.00026204	7.92719	6.06875	4.27348	3.47079
Eef1e1	0.00311333	0.00386968	3.86918	3.99086	2.62687	2.57396
Eef1g	9.70803e-05	0.000502911	6.23378	6.47552	4.6292	3.59582
Eef2	6.69614e-05	0.000432196	6.52316	10.3051	8.56767	3.33453
Eepd1	0.000818367	0.00160496	-4.71844	-0.716859	1.49641	-4.63724
Efemp2	0.000181721	0.000678981	5.76375	2.04308	-1.61518	12.6254
Efr3b	0.000122541	0.000559007	6.05654	2.52353	-1.21752	13.3712
Eftud2	0.000177996	0.000671002	5.77892	5.62887	4.58173	2.06644
Egf	0.00049226	0.0011786	5.05961	0.743134	-0.329381	2.1031
Egfl7	7.71563e-08	4.08974e-05	13.8101	2.59195	-0.667811	9.57823
Egln3	0.00142348	0.00227425	4.35895	4.56594	2.44091	4.36211
Egr1	0.00159007	0.00245545	-4.28846	1.9722	4.32685	-5.11471
Egr2	9.41975e-06	0.000238394	-8.2058	-0.482852	3.19825	-12.8269
Egr3	0.000581142	0.00130359	-4.94696	-2.93155	1.71254	-25.004
Ehbp1	0.0122511	0.0102565	-3.05003	-0.924637	1.06257	-3.96469
Ehd1	0.00405059	0.0046502	3.70861	3.59914	2.15882	2.7138
Ehd3	0.00646313	0.00646367	-3.42772	1.07118	4.19256	-8.7022
Ehd4	0.000170411	0.000654263	5.81091	4.02747	1.8739	4.44925
Eid1	0.0146941	0.011738	2.94362	4.91848	3.86631	2.07364
Eif1a	0.000592502	0.00131669	4.9339	5.64365	3.94955	3.23575
Eif1ad	0.0138573	0.0112315	2.9779	4.74822	3.74003	2.01139
Eif1ax	0.0049167	0.0053284	3.59152	5.73208	4.64441	2.1253
Eif1b	0.0430339	0.0266502	2.31643	4.59993	3.53727	2.08878
Eif2b1	0.000518472	0.00121333	5.02427	4.11348	2.85475	2.39284
Eif2b2	0.00243285	0.00325363	4.02143	4.10294	3.03506	2.09634
Eif2b3	0.00157302	0.00243806	4.2953	3.27403	2.17992	2.13482
Eif2s1	0.00288181	0.00367456	3.91669	5.95125	4.81454	2.1988
Eif2s2	0.00418247	0.00476034	3.68918	5.69857	4.52176	2.26077
Eif2s3x	0.00163931	0.0025054	4.2691	6.64279	5.34571	2.4573
Eif3b	3.68265e-05	0.000341896	7.00739	6.0008	4.37887	3.07787
Eif3c	0.000416292	0.00107348	5.17465	7.07473	5.85267	2.33279
Eif3d	5.17053e-05	0.00038836	6.72969	6.62274	4.91867	3.25819
Eif3e	4.10221e-06	0.000202765	9.00871	7.67268	5.77396	3.72882
Eif3f	2.10408e-05	0.000291754	7.48276	5.98668	4.40301	2.99732
Eif3g	0.000472249	0.00115471	5.08797	4.99955	3.47324	2.88047
Eif3h	4.86939e-05	0.000378625	6.77824	6.87115	5.05512	3.52111
Eif3i	0.00025288	0.000810958	5.52471	5.82829	4.3808	2.72733
Eif3j2	0.000458733	0.00113141	5.10786	4.96999	3.6802	2.44493
Eif3k	0.000170006	0.000654263	5.81266	5.793	4.17972	3.05946
Eif3l	4.9522e-06	0.000209034	8.82164	6.73995	4.99344	3.35545
Eif3m	0.00232024	0.00315267	4.0509	5.86043	4.84123	2.0268
Eif3s6-ps1	2.52015e-06	0.000172056	9.50755	3.66551	1.77386	3.71058
Eif3s6-ps2	0.00103515	0.00185557	4.56439	2.05547	0.455676	3.031
Eif3s6-ps4	0.00747783	0.00712504	3.341	1.41998	0.028512	2.62346
Eif4a3	0.00139797	0.00224883	4.37051	5.34523	4.1333	2.31646
Eif4b	5.6246e-05	0.000403401	6.66198	8.25826	6.65579	3.03664
Eif4ebp1	0.0683566	0.0383892	2.04254	1.45515	-0.0346567	2.80852
Eif4h	0.000248594	0.000799794	5.53694	7.51786	6.42601	2.13147
Eif5	0.00526704	0.0055837	3.55014	7.50929	6.44804	2.08674
Eif5a	9.64503e-06	0.000241025	8.18382	7.73059	5.4581	4.83156
Eif5al3-ps	3.24899e-05	0.000326405	7.11188	3.65589	1.53653	4.34503
Eif6	0.000623136	0.00135891	4.89998	4.98562	3.50993	2.78117
Eipr1	0.000620114	0.0013538	4.90325	4.20997	3.2024	2.01051
Elac1	0.000295358	0.000883473	5.41435	2.48274	1.43485	2.0675
Elac2	3.22629e-05	0.000326405	7.11776	4.06045	2.75611	2.46971
Elmo3	0.00833203	0.00770443	-3.27693	0.822338	2.35688	-2.89697
Elob	0.00430221	0.00486024	3.67209	4.72389	3.53222	2.28417
Elof1	0.000295492	0.000883473	5.41403	4.38303	2.9559	2.6891
Elovl5	0.00720851	0.00695359	3.36278	6.45278	4.98421	2.76747
Elp1	0.00118823	0.00201935	4.47497	5.26072	4.10044	2.23501
Elp3	9.96955e-05	0.000507266	6.21339	5.39063	3.6467	3.34946
Elp6	0.000121839	0.00055837	6.06087	2.5635	1.4284	2.19634
Emc4	0.0014394	0.00229043	4.35185	3.57369	2.33203	2.3647
Emc6	0.00155891	0.00242715	4.30103	3.92857	2.60635	2.5005
Emd	0.00076458	0.00153975	4.76343	3.79712	2.70511	2.13172
Emid1	0.0313516	0.0208521	2.50177	3.5477	2.09248	2.742
Emilin2	0.0513375	0.0306785	2.21256	0.79054	-1.26408	4.15434
Eml4	0.000165256	0.000645812	5.83353	5.9382	4.59785	2.53213
Enc1	0.0204736	0.0150173	2.75013	3.86497	2.56233	2.4668
Endod1	0.0119913	0.0100965	3.06259	2.61853	0.663581	3.87704
Endou	0.00105243	0.00187502	4.55362	7.91394	6.05268	3.63324
Eno1	0.0161652	0.0125941	2.8879	5.7402	4.18855	2.93151
Enoph1	0.00108787	0.00191684	4.5321	3.03325	1.71406	2.49526
Enpp1	0.000873689	0.00167058	4.67533	1.67923	-0.250536	3.80994
Entpd4	0.00714941	0.00691168	3.36767	3.7694	2.66268	2.15355
Entpd4b	0.00559052	0.00584706	3.51439	3.54902	2.51678	2.0452
Eny2	0.000124801	0.000563494	6.04277	5.20111	4.03685	2.24118
Epas1	3.63854e-05	0.000339369	7.01739	3.98126	-0.593743	23.835
Epb41l4aos	0.000217224	0.000743561	5.63394	1.86631	0.036579	3.55471
Epb41l5	7.00368e-05	0.000436035	6.48772	3.03253	0.850847	4.53684
Ephx1	0.02201	0.0158745	-2.70798	1.25695	2.78015	-2.87429
Epn2	0.00837442	0.00773823	3.27393	1.06575	-1.116	4.53702
Erap1	0.0275485	0.0188723	2.5772	6.19505	5.16037	2.04866
Erc1	0.00392163	0.00453755	-3.72825	2.83412	4.30555	-2.77298
Ergic1	0.000714487	0.0014781	4.80847	4.77033	2.98492	3.44716
Erh	2.41243e-05	0.000305558	7.36456	4.69766	2.92683	3.4125
Esd	0.00937345	0.00840367	3.20739	4.74243	3.57061	2.25295
Espl1	0.00510234	0.00545803	3.56922	5.27983	4.17531	2.15028
Esr1	0.0640898	0.0365084	-2.081	-0.00426798	1.399	-2.64499
Etf1	0.00163581	0.00250349	4.27046	6.64229	5.44719	2.28961
Etfa	0.000573517	0.00129182	4.95588	3.72239	2.44423	2.4253
Etfb	0.000897912	0.00169648	4.65736	3.75492	1.63234	4.35472
Etl4	0.0109641	0.00943356	-3.11515	-1.71096	0.449872	-4.47173
Etv5	0.00067744	0.00142871	4.84399	5.17603	1.5319	12.5024
Evi2	0.000435113	0.00110328	-5.14418	0.516918	2.03088	-2.85594
Evi2a	0.0541754	0.0320466	2.18076	1.78073	0.506242	2.41913
Evi2b	0.0426352	0.0264611	-2.32189	2.89342	4.01158	-2.1707
Evi5	1.391e-05	0.000266964	7.84889	3.80654	1.17936	6.17818
Exo1	0.000357999	0.000973712	5.27931	4.60801	3.0921	2.85978
Exoc6b	0.00551129	0.00578858	-3.52294	2.11377	4.43015	-4.98082
Exosc1	0.00343103	0.00413486	3.80967	2.9708	1.69184	2.42664
Exosc2	0.000170434	0.000654263	5.81081	4.73325	3.14369	3.00958
Exosc3	0.00205375	0.00289678	4.12708	3.95785	2.73382	2.336
Exosc4	0.000163098	0.0006429	5.84323	3.61001	1.92988	3.20456
Ext2	0.012059	0.0101404	3.05929	4.46996	3.44956	2.02849
Extl2	0.000218448	0.000745677	5.62988	3.05747	1.18106	3.67161
Eya1	0.0103456	0.00904828	-3.14928	-2.81209	-0.827782	-3.95673
Eya2	0.0105625	0.00918549	-3.13708	-1.41851	1.69258	-8.64038
F13a1	0.00890917	0.00809418	-3.23736	2.29998	5.64563	-10.1658
F2rl3	0.0339195	0.0221922	2.4558	2.05031	0.517273	2.89394
F730311O21Rik	0.000292152	0.000878742	-5.42207	-2.31453	1.8155	-17.509
F8	0.0163557	0.0127001	2.88106	1.49775	0.366646	2.19026
F830112A20Rik	0.0211796	0.0154269	-2.73038	2.11873	3.16092	-2.05936
Faah	0.0304395	0.0204163	-2.519	1.17308	4.11317	-7.67462
Faap24	0.00369984	0.00435411	3.76366	2.35269	1.34241	2.0143
Fabp5	0.0156113	0.0122732	2.90826	4.05353	2.13086	3.79126
Fahd1	0.00876984	0.00800127	3.24667	0.924242	-0.19391	2.17069
Fahd2a	0.00310466	0.0038622	3.87089	1.68661	0.676817	2.01362
Fam102a	0.0136033	0.0110963	-2.98873	2.45208	4.18287	-3.31911
Fam136a	0.0248435	0.0174033	2.63743	3.80689	2.51117	2.45498
Fam162a	0.00638022	0.00640818	3.43542	3.28652	1.87318	2.66354
Fam174a	0.0265447	0.0183332	2.59883	2.82136	1.64616	2.25824
Fam193b	0.000824775	0.00161346	-4.71329	5.32781	6.51874	-2.283
Fam210b	0.0415295	0.0259084	2.33731	1.20301	-0.0494589	2.38249
Fam214a	0.00280693	0.00360118	-3.93291	3.41267	4.69393	-2.43051
Fam220a	0.0160275	0.0125089	2.89289	2.99113	1.88622	2.15085
Fam234b	0.0552122	0.0325243	-2.16955	2.40661	4.35007	-3.84628
Fam49a	0.0105276	0.00916111	-3.13902	2.02643	3.53041	-2.83624
Fam72a	0.00358576	0.00424535	3.78275	2.13083	0.782586	2.54601
Fam78a	0.00297701	0.0037531	-3.89669	4.90932	6.47656	-2.96336
Fanca	0.00118209	0.00201627	4.47832	4.01739	2.78435	2.35063
Fancd2	0.00114391	0.00197959	4.49954	4.23774	3.16118	2.109
Fance	0.00438603	0.00491939	3.66042	3.00949	1.8668	2.20793
Fancl	0.0189776	0.0142031	2.79435	3.08269	2.06613	2.02308
Fas	0.0120664	0.0101404	-3.05893	1.45288	4.24916	-6.94649
Fasn	0.0132411	0.0108477	3.00452	6.56137	5.31337	2.37512
Fau	4.37497e-05	0.000359155	6.86546	5.7389	3.99532	3.34867
Fbl	5.80673e-05	0.00040751	6.63647	3.47214	1.71079	3.39014
Fbxl12	0.000353597	0.000972752	-5.28794	4.21648	5.52504	-2.47693
Fbxl12os	6.71984e-05	0.000432742	-6.52036	0.509869	1.53271	-2.03192
Fbxl19	0.00277088	0.00356724	3.94089	3.74976	2.5647	2.27373
Fbxl6	5.27757e-05	0.000393584	6.71317	4.07478	2.86718	2.30954
Fbxo17	1.75935e-07	5.88093e-05	12.6628	2.13347	-0.747487	7.36639
Fbxo31	0.000145622	0.000612722	5.92724	3.49986	2.0754	2.68415
Fbxo34	0.00241505	0.00323579	4.02599	4.52422	3.00041	2.8755
Fbxo4	0.000772446	0.00154819	4.75665	1.32097	-0.230067	2.93028
Fbxo44	0.0345204	0.0224744	2.44554	0.796347	-0.970497	3.40309
Fbxo6	0.0277627	0.0189895	2.57268	1.50487	0.141113	2.57355
Fbxw9	3.96949e-05	0.000352334	6.94534	1.82989	0.412618	2.6708
Fcf1	0.00183754	0.0026996	4.19696	3.33909	2.27097	2.09671
Fcgr3	0.0548253	0.0323395	2.17371	1.6155	-0.0063	3.07759
Fchsd2	0.000623824	0.00135966	-4.89924	3.8177	5.14551	-2.51021
Fcmr	0.0347886	0.0226119	-2.44101	-2.1351	-0.322217	-3.51344
Fcna	0.0165575	0.0128118	2.87391	1.51569	-1.85423	10.3383
Fcrl1	0.0892287	0.0472525	-1.88201	-1.59221	0.011384	-3.039
Fcrla	0.0339424	0.0222036	-2.4554	-2.30585	-0.182664	-4.35654
Fdx1	0.0011197	0.00195451	4.51339	2.03088	0.68874	2.53527
Fdx1l	6.34099e-05	0.000424123	6.56633	2.29627	-0.284121	5.98103
Fech	0.00260983	0.00342915	3.97789	4.03129	2.34528	3.21766
Fen1	0.00118757	0.00201935	4.47533	5.71398	4.24008	2.77771
Ffar1	0.0449873	0.0276274	-2.29035	-3.21839	-1.92953	-2.44335
Fgd2	0.0371746	0.0237586	-2.40222	-0.0158792	1.38436	-2.63946
Fgfrl1	0.0270427	0.0185899	2.588	1.32321	0.25449	2.09757
Fgl2	0.0317534	0.0210664	-2.49434	0.820433	1.87805	-2.0815
Fgr	0.0231186	0.0164665	2.67935	3.06905	1.68536	2.60934
Fh1	0.000255926	0.000817292	5.51616	4.93669	3.34621	3.01149
Fkbp3	0.0026173	0.0034333	3.97613	5.55374	4.46051	2.13351
Fkbp4	0.00970058	0.00863046	3.18717	6.02318	4.81631	2.30836
Fkbp5	1.71202e-06	0.000150959	9.9193	8.61999	5.97482	6.25569
Fkbp7	0.000815208	0.00160272	4.721	0.3079	-0.882087	2.28151
Flt3	0.000892172	0.00169046	-4.66158	-0.478626	1.26847	-3.35682
Flt3l	0.00707391	0.00686007	-3.37398	1.12209	2.74282	-3.0753
Flywch1	0.00328076	0.00400514	3.83707	3.86711	2.75089	2.16778
Fmc1	0.00118026	0.00201528	4.47932	1.86225	-0.0717147	3.82104
Fmo5	8.572e-05	0.000468493	-6.3298	-1.48036	0.682413	-4.47775
Fnbp1	0.00280462	0.00359938	-3.93342	5.22971	6.23102	-2.00181
Fnbp1l	0.021545	0.0156127	-2.72041	-0.139629	2.51713	-6.30616
Fndc10	0.0362722	0.0233471	2.41659	0.984397	-0.679169	3.16799
Fnip1	0.0514292	0.0307286	-2.21151	3.94689	4.98296	-2.05065
Fnip2	0.0260225	0.0180597	2.61041	2.28809	1.25	2.05351
Foxred2	0.0238286	0.0168588	2.66173	2.91129	1.36549	2.91967
Fpgs	0.0011668	0.00200263	4.48673	2.94383	1.29419	3.13755
Frmd4a	0.00818607	0.0076102	3.28739	4.07257	2.73049	2.53517
Frmd4b	0.0190814	0.01427	2.79117	4.45137	3.20818	2.36721
Fstl1	0.0504821	0.0302583	2.22248	1.17455	-2.04985	9.34633
Fstl3	0.00125972	0.00208901	4.43732	0.997299	-2.15361	8.88216
Ftl2-ps	0.0107734	0.00930369	3.12546	0.960484	-0.314827	2.42051
Ftsj3	0.000991906	0.00181294	4.5922	5.48341	4.22678	2.38938
Fuca1	0.00380789	0.00444216	3.74614	3.79051	2.67691	2.16385
Fuca2	0.00118283	0.00201627	4.47792	3.50682	2.33552	2.25215
Fundc2	3.62083e-05	0.000338512	7.02144	4.48519	2.7308	3.37383
Fus	0.018363	0.0138633	-2.81354	5.81244	6.8189	-2.00899
Fut10	0.00937376	0.00840367	3.20737	2.52627	0.818338	3.26692
Fxn	0.000170833	0.000654558	5.80909	2.73971	1.17623	2.95567
Fxyd5	0.0333852	0.0219003	-2.46508	2.96112	4.02365	-2.08859
Fzd5	0.000212562	0.000735908	5.64963	3.47862	1.15277	5.01361
Fzd7	2.65028e-07	7.0203e-05	12.1249	2.50859	-0.176979	6.43335
G3bp1	0.000728164	0.00149655	4.79585	7.26043	5.93374	2.50826
G6pc3	1.78453e-05	0.000275421	7.62695	1.84077	-0.259812	4.28882
G6pdx	0.00210999	0.00294682	4.11017	4.15675	3.01611	2.20479
Gaa	0.00169715	0.00256401	4.24714	3.27389	1.8502	2.68269
Gab3	1.99589e-05	0.000289433	-7.52875	0.116276	1.28246	-2.24418
Gabbr1	0.000828646	0.00161713	-4.7102	2.0694	5.63288	-11.8226
Gadd45g	2.73871e-05	0.00030971	7.25613	1.01713	-2.47747	11.2715
Gadd45gip1	0.0062122	0.00629672	3.45134	3.62383	2.45138	2.25394
Gale	0.00858289	0.00787409	3.2594	2.11917	0.930318	2.27971
Galk1	0.000539958	0.00124014	4.99669	4.36185	2.33946	4.06255
Galns	0.0260259	0.0180597	2.61033	2.87789	1.42542	2.73676
Galnt6	0.00231146	0.00314313	4.05325	6.61505	5.33961	2.42073
Gapdh	0.000227816	0.000763228	5.5996	6.28503	4.72803	2.94242
Gapdh-ps15	0.000143959	0.000609156	5.93579	3.31268	1.62226	3.22749
Gar1	6.90958e-06	0.00022642	8.49829	2.96796	0.853806	4.32937
Gars	0.000913479	0.00171448	4.64608	5.81571	4.13413	3.2078
Gart	9.53447e-05	0.000496509	6.24764	5.87246	4.04311	3.55377
Gas2	0.000209052	0.000729033	5.66169	1.65475	-1.00035	6.29888
Gas6	0.0350747	0.0227644	-2.43623	-1.14611	1.16482	-4.96203
Gata1	0.0487393	0.0294223	2.24319	-0.105036	-1.99824	3.71459
Gatm	0.000920417	0.00172343	4.64112	1.55992	-1.20185	6.78226
Gbe1	0.0014811	0.00233993	4.33363	3.56177	2.32832	2.35129
Gbp4	0.00211145	0.00294783	-4.10973	4.42004	6.15826	-3.33623
Gbp5	0.000370065	0.000994868	-5.25622	-0.49764	1.30488	-3.48829
Gbp7	0.0621557	0.035699	-2.09925	3.10751	4.24147	-2.1946
Gbp9	0.0281353	0.0192048	-2.56491	4.49544	5.59729	-2.14629
Gcat	0.0342262	0.0223387	2.45054	-1.04198	-2.5754	2.89473
Gch1	0.0117111	0.00990462	3.07646	3.1174	1.87709	2.3625
Gclm	0.0226473	0.0162428	2.69135	4.57773	3.40704	2.2512
Gcsam	0.0313825	0.0208587	-2.5012	-3.60432	-1.5084	-4.275
Gcsh	2.07776e-05	0.000291754	7.49371	3.68302	1.0042	6.40328
Gda	0.00357345	0.00423584	3.78485	2.75378	-0.0512322	6.98863
Gdap10	0.0126545	0.0105107	-3.03105	1.60133	2.73604	-2.19575
Gdi1	0.00519075	0.00552521	-3.5589	4.43985	5.60487	-2.24237
Gemin2	0.00123525	0.00206308	4.44995	3.03771	2.02159	2.02247
Gemin6	0.00524319	0.00556584	3.55286	2.8411	1.71323	2.18537
Gemin7	0.00385671	0.00448674	3.7384	2.99604	1.8414	2.22628
Gfm1	0.00308018	0.00384378	3.87575	4.33404	3.19287	2.2056
Ggact	3.18643e-05	0.00032547	7.12819	3.55431	1.4852	4.19626
Ggt5	0.0236136	0.0167484	-2.66701	-1.55567	0.657188	-4.63591
Ghitm	0.00321062	0.00394828	3.8503	6.51759	5.10097	2.66959
Gimap1os	0.0148877	0.0118474	-2.93597	2.49297	3.87288	-2.60252
Gimap3	0.000129765	0.000574637	-6.01343	1.39729	4.74707	-10.1949
Gimap6	0.0130222	0.0107326	-3.01427	5.49507	6.98598	-2.81066
Gimap8	0.00296029	0.0037376	-3.90015	4.89725	6.52987	-3.10077
Gins1	0.000923094	0.00172564	4.63922	3.29097	1.82705	2.75857
Gins2	8.68538e-05	0.000471762	6.31962	4.03445	1.58442	5.46428
Gins4	0.000116234	0.0005472	6.09647	4.00396	2.72966	2.41881
Gipc1	0.00468545	0.00513285	3.62054	3.28624	2.02012	2.40514
Git2	0.000294556	0.000883298	-5.41627	5.70695	6.79676	-2.12847
Gk5	0.000985344	0.00180586	4.59653	4.62734	2.51343	4.32863
Gla	4.95982e-05	0.000383405	6.76333	1.89193	0.615152	2.42297
Glcci1	0.021446	0.015561	-2.7231	5.19099	6.8026	-3.05594
Glipr1	0.0161079	0.0125592	-2.88998	0.875001	3.34492	-5.54013
Glipr2	0.0230371	0.0164334	2.6814	3.14907	2.01802	2.19018
Glmn	0.00214235	0.00297944	4.10065	2.80675	1.70486	2.14636
Glod4	0.000701047	0.0014599	4.82112	4.85116	3.49188	2.56557
Glrx3	0.000152271	0.000623094	5.89406	4.93546	3.25718	3.20046
Glrx5	0.000392371	0.00103819	5.21557	3.94233	2.30236	3.11658
Glud-ps	0.00263151	0.00344169	3.97278	2.34289	1.07435	2.40917
Glud1	0.00691517	0.00675757	3.38747	5.82482	4.72566	2.14231
Gm10012	0.000256089	0.000817292	5.5157	4.24419	2.48691	3.38062
Gm10020	0.00223204	0.00306669	4.07504	5.63215	0.706405	30.3946
Gm10036	8.54832e-05	0.000467842	6.33195	6.22593	4.29824	3.80445
Gm10039	9.43966e-05	0.000494814	6.25533	4.30101	1.98118	4.99274
Gm10045	4.60691e-05	0.000367933	6.82328	2.44238	0.760811	3.20777
Gm10051	2.15144e-05	0.000293758	7.46343	2.71352	0.0632617	6.27778
Gm10052	3.43287e-06	0.000192705	9.18857	7.96829	6.29522	3.18893
Gm10053	0.00496105	0.00535358	3.58611	5.25464	4.02857	2.33929
Gm10073	0.000563288	0.00127456	4.96805	6.80479	4.95791	3.59722
Gm10075	0.00728719	0.0070089	3.35633	2.21714	1.16506	2.07351
Gm10076	0.000476519	0.00116229	5.08182	5.96687	3.95651	4.02881
Gm10095	3.99036e-05	0.000352334	6.94102	2.58751	0.638133	3.86208
Gm10110	8.8595e-06	0.000235474	8.26305	4.92927	2.86966	4.16874
Gm10120	6.10736e-05	0.000414106	6.59619	3.30964	1.45296	3.62174
Gm10123	0.0065854	0.00654641	3.41656	8.50287	7.16285	2.53155
Gm10131	1.14841e-05	0.0002535	8.02287	5.6756	3.53377	4.41321
Gm10132	8.6348e-05	0.000471277	6.32414	6.64566	4.71194	3.82039
Gm10136	0.00974182	0.00864972	3.18467	1.27372	-0.0615788	2.52328
Gm10145	0.000848002	0.00163813	4.69498	3.29738	1.72933	2.96503
Gm10146	0.000136453	0.000589384	5.97577	3.21936	1.3669	3.61116
Gm10154	0.000157504	0.000633419	5.86902	2.13971	-0.0504501	4.56357
Gm10155	2.08152e-05	0.000291754	7.49214	1.56933	-0.297884	3.64829
Gm10156	5.67621e-05	0.000404184	6.65466	5.30314	2.5685	6.65591
Gm10163	5.81816e-05	0.00040751	6.6349	5.8061	3.97837	3.54977
Gm10169	3.61714e-05	0.000338512	7.02229	3.66163	0.619265	8.23839
Gm10171	0.0314958	0.0209165	2.49909	1.66914	0.100901	2.96543
Gm10175	1.3557e-05	0.000262763	7.87206	6.61735	4.15863	5.49727
Gm10177	0.0066936	0.00661976	3.40685	4.74855	3.25611	2.81364
Gm10182	0.000465002	0.0011404	5.09856	4.75058	2.8261	3.796
Gm10193	1.1414e-05	0.0002535	8.02848	1.00808	-1.23944	4.74865
Gm10221	5.44903e-05	0.00039875	6.68744	5.33931	3.26484	4.21192
Gm10231	3.59778e-05	0.000338512	7.02675	1.40557	-1.59925	8.02676
Gm10232	0.000457321	0.0011308	5.10998	4.98378	3.78586	2.29408
Gm10233	0.0010388	0.00185979	4.56209	2.02248	-0.0963138	4.34331
Gm10240	6.81203e-05	0.00043417	6.5096	5.80181	4.0256	3.42527
Gm10241	0.00279019	0.00358665	3.9366	4.30443	3.29823	2.00862
Gm10243	0.00100652	0.00182613	4.58266	4.81553	3.20281	3.05828
Gm10257	0.000232773	0.00077138	5.58411	1.26332	-0.0748335	2.52828
Gm10260	2.04285e-05	0.000290929	7.50847	7.9782	5.78857	4.56188
Gm10263	0.000170125	0.000654263	5.81214	3.86194	1.73157	4.37828
Gm10269	0.000500304	0.00119034	5.04856	2.69319	0.673173	4.05588
Gm10273	0.00408681	0.00467826	3.70321	5.44179	3.95816	2.79651
Gm10275	4.72055e-05	0.000373632	6.80345	9.49049	7.25004	4.72544
Gm10282	0.00429493	0.00485772	3.67312	6.57932	5.43123	2.21621
Gm10284	0.000257857	0.000820954	5.5108	2.51921	0.998918	2.86848
Gm10288	4.54426e-05	0.000364029	6.83444	8.26549	6.32943	3.82658
Gm10293	0.000312938	0.000905988	5.37356	1.78903	-0.185983	3.93133
Gm10320	0.00394542	0.00455844	3.72458	3.51227	1.8224	3.22628
Gm10335	1.61346e-06	0.000150959	9.98373	6.82333	4.68686	4.39683
Gm10358	8.11566e-05	0.000461473	6.37231	3.41101	1.55783	3.61297
Gm10359	8.38957e-05	0.000462338	6.34649	4.73729	2.93267	3.49336
Gm10420	1.45508e-05	0.000266964	7.80842	2.64009	-0.0040515	6.25123
Gm10443	6.54067e-05	0.000427141	6.54175	6.44976	4.20319	4.74554
Gm10451	0.0619629	0.0355985	2.1011	2.95685	0.736707	4.6594
Gm10481	0.000273214	0.000846117	5.46959	2.34724	0.520571	3.54718
Gm10501	0.00189911	0.00275701	4.17621	1.22585	0.0655211	2.23509
Gm10521	6.5432e-08	4.08974e-05	-14.0505	0.710849	2.60852	-3.72612
Gm10566	0.000528573	0.00122962	5.01116	1.32525	-0.0865853	2.66076
Gm10608	0.000267878	0.000838233	5.48362	1.17482	-0.242288	2.67049
Gm10651	0.0136879	0.0111402	2.9851	1.47455	-0.0274608	2.83238
Gm10676	0.00263532	0.00344243	-3.97188	1.34555	2.79923	-2.73906
Gm10689	9.71488e-06	0.000241253	8.17711	1.87126	-0.154272	4.07143
Gm10698	0.000547794	0.00125451	4.98693	5.07578	3.75814	2.49258
Gm10704	0.00151955	0.00238173	4.3173	4.61704	3.16253	2.74064
Gm10705	0.000840017	0.00162892	4.70121	3.30558	1.92036	2.61213
Gm10717	2.60509e-05	0.000307631	7.29875	5.34746	-2.93137	310.581
Gm10718	1.77585e-05	0.000275421	7.63125	7.21191	-0.131641	162.416
Gm10719	3.16095e-05	0.000325169	7.13493	5.77002	-2.37026	282.143
Gm10774	0.0349302	0.0226817	2.43864	0.410634	-0.901555	2.48318
Gm10800	6.80056e-06	0.00022642	8.51352	10.122	0.85359	616.685
Gm10819	0.000235841	0.00077785	5.5747	3.57863	1.22583	5.10816
Gm10916	9.07324e-05	0.000483906	6.28584	0.989691	-1.45778	5.45458
Gm10925	0.000845692	0.00163594	4.69678	10.3994	9.37871	2.02883
Gm10933	0.00156193	0.00243008	-4.2998	0.994921	2.15175	-2.22966
Gm11221	0.00177199	0.00263598	4.21987	2.85286	1.81993	2.04617
Gm11223	0.000391226	0.00103678	5.2176	6.06235	4.7654	2.45708
Gm11224	0.000478107	0.00116545	5.07954	1.83924	0.644287	2.28937
Gm11246	0.000760354	0.00153513	4.76711	0.956143	-0.979256	3.82484
Gm11249	2.17409e-06	0.00015997	9.66315	2.41321	-0.287523	6.50134
Gm11273	0.000301189	0.000893746	5.40054	3.61408	1.83359	3.43543
Gm11353	3.82274e-05	0.000349978	6.97646	1.47495	-0.836169	4.96267
Gm11361	7.30953e-05	0.000442058	6.4541	7.736	5.59579	4.40829
Gm11407	0.000156914	0.000632324	5.8718	4.14199	2.62873	2.85454
Gm11408	0.000975831	0.00179921	4.60286	4.2332	3.05457	2.26361
Gm11423	0.00343426	0.00413506	3.8091	0.153537	-1.10099	2.3859
Gm11425	0.00195048	0.00280793	4.15944	1.2878	0.161003	2.18373
Gm11451	6.07364e-05	0.000413229	6.6006	1.12332	-1.32524	5.45872
Gm11478	0.000124236	0.000561614	6.04619	7.43957	5.47981	3.88997
Gm11488	0.000588846	0.0013128	4.93808	3.15794	2.03263	2.1815
Gm11512	0.0049176	0.0053284	3.59141	5.26503	4.24865	2.02283
Gm11516	0.000560864	0.00127052	4.97096	1.07742	-0.692402	3.41011
Gm11518	1.89727e-05	0.000284315	7.57309	6.25944	4.39661	3.6372
Gm11539	0.000740113	0.00151271	4.78502	3.30253	1.35073	3.86858
Gm11560	1.63603e-05	0.00027256	7.70381	4.97782	3.17462	3.48993
Gm11605	0.00604216	0.0061891	3.46791	2.95333	1.8014	2.22212
Gm11652	0.00421305	0.00478515	3.68477	3.39515	2.27422	2.17486
Gm11675	3.20778e-05	0.000326405	7.12258	2.79857	0.828608	3.91758
Gm11687	4.23249e-06	0.000202765	8.97743	1.22325	-1.13981	5.1446
Gm11703	0.000107032	0.000524781	6.15912	1.92178	-0.125779	4.13407
Gm11737	0.007996	0.007479	-3.30129	-1.13037	0.651469	-3.43863
Gm11808	5.0622e-05	0.00038557	6.7468	8.41652	6.60149	3.51866
Gm11839	0.0470516	0.0286209	-2.26395	0.324408	1.38806	-2.09022
Gm11868	0.00218547	0.00302144	4.0882	3.30695	2.15711	2.2189
Gm11878	4.61151e-05	0.000367933	6.82247	1.91179	-0.320529	4.69887
Gm11892	0.021261	0.0154663	2.72815	1.0599	-0.196178	2.38846
Gm11914	0.00245314	0.00327312	4.01627	0.825935	-0.199762	2.03594
Gm11942	0.000214967	0.000741825	5.64149	0.919096	-1.33717	4.77754
Gm11993	0.000459911	0.00113221	5.10611	3.02213	1.62558	2.63272
Gm12009	0.000318048	0.000913085	5.36217	1.96333	0.362193	3.03382
Gm12020	0.00126746	0.00209923	4.43338	2.04154	0.739804	2.46525
Gm12033	0.000127759	0.000569731	6.02514	4.31243	2.63202	3.20517
Gm12057	0.000432192	0.00109798	5.14881	0.0324895	-1.34966	2.60657
Gm12070	0.000257192	0.000819493	5.51264	4.45113	2.78848	3.16597
Gm12091	2.59816e-06	0.000172056	9.47569	2.05367	-0.623399	6.39555
Gm12096	0.0010295	0.00185197	4.56795	0.901918	-0.815337	3.2881
Gm12112	0.00139091	0.00224193	4.37376	1.64589	0.322764	2.50207
Gm12138	0.00258928	0.00341117	3.98279	2.58669	1.15461	2.69837
Gm12174	0.000246721	0.000797643	5.54235	7.20402	5.72874	2.78038
Gm12184	0.000678637	0.00143027	4.84281	5.05843	3.00473	4.15168
Gm12191	3.40315e-05	0.000332202	7.07309	6.66093	4.67076	3.97285
Gm12231	0.000317141	0.00091246	5.36418	4.93235	3.24574	3.21901
Gm12251	0.0026655	0.00347111	3.96484	3.1076	2.04952	2.08217
Gm12254	6.85287e-05	0.00043417	6.50488	6.12273	4.16435	3.88627
Gm12261	0.00309437	0.00385663	3.87293	1.30762	-0.137446	2.72275
Gm12267	0.000458364	0.0011312	5.10842	0.776547	-0.962197	3.33744
Gm12286	0.000581037	0.00130359	4.94709	1.8553	0.114997	3.34106
Gm12338	0.00121141	0.00203952	4.46251	3.96155	2.36857	3.01672
Gm12350	0.0011878	0.00201935	4.47521	3.69617	2.0867	3.0514
Gm12355	0.00429839	0.00486024	3.67263	5.12284	4.10515	2.02467
Gm12366	0.00010647	0.000523188	6.16314	3.30491	1.20009	4.30143
Gm12411	0.000420966	0.00108121	5.16694	3.8728	2.41923	2.73885
Gm12537	0.000103836	0.000516363	6.18226	4.3407	2.55183	3.45544
Gm12565	0.00876096	0.00799867	3.24727	0.552263	-0.588121	2.2044
Gm12599	5.5208e-05	0.000399937	6.67693	1.91934	0.606539	2.48424
Gm12657	0.000454674	0.00112908	5.11396	0.138073	-1.30638	2.7216
Gm12663	0.000112514	0.000536683	6.12113	2.63274	1.15462	2.78586
Gm12669	0.000101862	0.000510382	6.19693	5.67037	3.61547	4.15514
Gm12671	0.000117812	0.000549817	6.08627	4.71599	2.99613	3.29403
Gm12693	0.00049001	0.00117713	5.06274	3.32868	2.1434	2.27407
Gm12715	0.0161851	0.0126024	2.88718	6.34748	5.22861	2.17175
Gm12722	3.68284e-05	0.000341896	7.00734	1.05371	-0.615422	3.18023
Gm12734	0.00334134	0.00405754	3.82587	2.05845	0.825796	2.34999
Gm12751	5.0239e-05	0.000385359	6.75294	2.56155	0.423727	4.40099
Gm12791	0.000201866	0.000714866	5.68707	1.4935	-0.106072	3.03054
Gm12856	0.0217459	0.0157298	2.71501	2.79972	1.60348	2.2914
Gm12857	5.39401e-05	0.000397309	6.6956	1.87	-0.578023	5.45667
Gm12870	0.000270536	0.000842758	5.47659	1.37328	-0.472994	3.5957
Gm12906	0.000264342	0.000830924	5.49308	0.716969	-0.710822	2.69034
Gm12918	0.000107744	0.000524781	6.15407	8.07597	6.13273	3.84567
Gm12922	3.49197e-06	0.000192705	9.17122	2.46255	-0.281757	6.70066
Gm12940	7.66758e-05	0.000453361	-6.41663	2.9486	4.01943	-2.10065
Gm12988	0.00233452	0.00316365	4.04708	2.17548	1.1116	2.09055
Gm12989	0.000271738	0.000844179	5.47344	3.36426	1.79281	2.97204
Gm13050	3.07479e-05	0.000322353	7.15818	5.64213	3.80346	3.5768
Gm13092	1.34588e-05	0.000262415	7.87862	4.26316	2.0752	4.55661
Gm13127	5.77585e-05	0.00040751	6.64073	4.53067	2.99347	2.90231
Gm13167	0.0405535	0.0254193	2.35126	0.933926	-0.282806	2.3242
Gm13192	0.000561295	0.00127078	4.97044	0.942344	-1.75536	6.48768
Gm13196	0.000874305	0.00167072	4.67487	1.80719	-0.0661798	3.66388
Gm13212	0.0820638	0.044304	-1.93272	3.29788	4.78767	-2.80848
Gm13237	0.0144408	0.0115822	2.95378	5.69724	4.48003	2.32497
Gm13292	0.00012285	0.000559727	6.05464	3.49871	1.81146	3.22042
Gm13328	0.00194086	0.00280017	4.16254	3.29239	1.76437	2.88388
Gm13331	0.00120313	0.00203235	4.46693	1.77912	0.62689	2.22257
Gm13339	0.000201031	0.000714044	5.69008	6.62649	5.46365	2.23897
Gm13340	0.000555067	0.00126519	4.97799	11.9556	10.9413	2.01983
Gm13341	0.000151039	0.000621894	5.90009	3.36634	1.85214	2.85639
Gm13394	0.0114623	0.0097461	3.08906	4.45545	3.15979	2.45489
Gm13408	0.0150167	0.0119094	2.93093	2.80307	1.75361	2.06976
Gm13422	0.00748198	0.00712569	3.34068	2.86955	1.86585	2.00514
Gm13436	0.000482395	0.00116688	5.07344	6.98619	5.08285	3.74079
Gm13453	0.000151817	0.000621894	5.89627	2.77845	1.51821	2.39537
Gm13456	0.000100091	0.000507266	6.21035	9.80294	8.00982	3.46566
Gm13461	0.000530543	0.00123074	5.00863	5.73211	3.95403	3.42969
Gm13464	0.000238779	0.000781505	5.56581	2.84271	0.860506	3.95097
Gm13487	0.0014233	0.00227425	4.35904	2.66409	1.29035	2.59141
Gm13493	0.0541388	0.0320297	2.18116	0.9898	-0.22953	2.32839
Gm13498	6.82287e-05	0.00043417	6.50835	1.87663	-0.312402	4.55999
Gm13502	7.77431e-05	0.00045415	6.40582	2.29382	0.879609	2.66515
Gm13532	0.000596443	0.00132247	4.92944	0.535052	-1.65463	4.56204
Gm13552	0.00107779	0.00190414	4.53814	0.608999	-1.25888	3.64995
Gm13611	0.000244479	0.000792977	5.54889	4.99463	2.87106	4.35769
Gm13653	0.000221003	0.000749247	5.62149	1.33327	-0.865633	4.59131
Gm13680	0.000163952	0.000643713	5.83937	6.72692	4.82982	3.72464
Gm13712	0.011249	0.00960995	3.10009	1.86931	0.328953	2.90866
Gm13736	0.0368338	0.0235787	2.40761	2.74974	1.65329	2.13828
Gm13835	0.00116035	0.00199328	4.49032	5.45002	4.09053	2.56595
Gm13904	2.38576e-05	0.000305558	7.37412	0.83795	-1.1091	3.85587
Gm13910	0.00618114	0.00628287	3.45433	5.36338	4.26239	2.14502
Gm14017	0.00396887	0.00458175	3.72098	1.38374	0.316241	2.0958
Gm14032	0.00430098	0.00486024	3.67227	0.260159	-1.48512	3.3526
Gm14038	0.00160286	0.00246658	4.28337	1.63692	0.246307	2.6219
Gm14117	0.0086472	0.00791481	3.25499	2.44019	1.40431	2.05036
Gm14121	0.00735935	0.00704946	3.35048	3.93077	2.82757	2.14831
Gm14131	0.00392446	0.0045395	3.72781	1.11965	-0.157304	2.42327
Gm14150	0.0001994	0.000711845	5.696	4.33992	2.31959	4.05679
Gm14176	0.000581368	0.00130359	4.9467	4.45564	3.20894	2.37298
Gm14269	0.00050484	0.00119541	5.04241	3.63843	2.19473	2.72018
Gm14270	0.0285618	0.0194158	2.55614	2.95123	1.91313	2.05353
Gm14276	0.000408168	0.00106121	5.18826	0.921314	-0.293295	2.32078
Gm14277	0.000613128	0.00134446	4.91086	2.73428	1.00177	3.32305
Gm14303	0.000772668	0.00154819	4.75646	6.77537	5.11398	3.16321
Gm14373	0.000207304	0.000726355	5.66778	3.67307	2.36964	2.46816
Gm14388	0.000853791	0.0016444	4.6905	2.13984	0.924815	2.32144
Gm14399	0.0605284	0.0349614	-2.11502	0.706432	2.44847	-3.34507
Gm14414	7.09758e-05	0.000438398	6.47723	4.77925	3.02673	3.36947
Gm14438	5.25361e-05	0.000393584	6.71683	2.24523	-0.525963	6.82674
Gm14494	4.04726e-05	0.000355777	6.92936	4.97179	2.95529	4.04601
Gm14539	0.000549474	0.0012569	4.98485	2.12151	0.305189	3.52181
Gm14567	0.000491379	0.00117847	5.06084	2.85664	0.889798	3.90911
Gm14586	5.42449e-05	0.000398397	6.69107	7.94816	6.14027	3.50129
Gm14633	0.000748026	0.00152184	4.77796	0.644646	-1.26837	3.76597
Gm14648	0.000668327	0.00142309	4.85304	3.51937	1.61863	3.73404
Gm14681	0.000157294	0.000633212	5.87001	6.9181	5.16783	3.36421
Gm14706	0.00262325	0.00343614	3.97472	0.535545	-1.41023	3.85244
Gm14719	0.0832377	0.0448267	1.92414	0.48322	-0.608328	2.13103
Gm14760	0.000130097	0.000574637	6.01151	4.52128	2.6751	3.59546
Gm14780	9.28646e-06	0.000238053	8.21908	0.0974726	-2.24162	5.05985
Gm14830	0.0100256	0.00884047	3.16777	0.767208	-0.522855	2.44539
Gm14857	8.86067e-05	0.00047627	6.30415	2.71991	0.780737	3.83487
Gm14928	0.000189031	0.000689676	5.73491	0.424027	-1.89173	4.97867
Gm15013	9.5279e-05	0.000496509	6.24817	0.928522	-1.15181	4.22904
Gm15204	0.000468681	0.0011481	5.09316	0.855793	-0.422698	2.42585
Gm15267	0.000874603	0.00167072	4.67465	1.20301	-0.523737	3.30981
Gm15285	0.000856377	0.00164858	4.68851	1.58462	0.149716	2.70364
Gm15309	0.000111115	0.000531934	6.13064	1.7808	-0.234732	4.04331
Gm15421	0.00161282	0.00247519	4.27944	5.49771	3.73465	3.39419
Gm15427	0.000149674	0.000620779	5.90683	7.82835	6.06427	3.39657
Gm15428	0.00117811	0.00201335	4.4805	3.36756	2.00283	2.57529
Gm15429	0.00477134	0.00520113	3.60959	2.45419	1.34016	2.16449
Gm15452	0.00543621	0.00572333	3.53117	3.2141	1.98265	2.34804
Gm15459	0.019799	0.0146577	2.76966	8.95079	7.87208	2.11214
Gm15484	9.18536e-05	0.000487632	6.27636	3.45087	1.44935	4.00421
Gm15495	0.000586887	0.00131006	4.94033	1.29166	-0.32197	3.06022
Gm15500	3.01748e-05	0.000320574	7.17404	9.79618	7.93023	3.64509
Gm15501	2.00819e-05	0.000289433	7.52339	8.65604	6.34291	4.96961
Gm15583	0.00964424	0.00858418	3.1906	2.57764	1.56152	2.02246
Gm15590	0.0399273	0.0251298	2.36038	-0.0675567	-1.22916	2.23707
Gm15596	0.00468168	0.00513201	3.62103	0.23247	-0.811268	2.06156
Gm15682	1.74012e-05	0.000275152	7.64919	1.89504	0.004804	3.70695
Gm15710	0.000294075	0.00088252	5.41743	3.63443	1.35107	4.86811
Gm15772	6.54687e-05	0.000427141	6.541	7.79602	5.4489	5.08807
Gm15784	0.00407234	0.00466574	3.70536	0.943719	-0.115953	2.08446
Gm15790	0.000516775	0.00121173	5.0265	1.98681	0.657267	2.51323
Gm15793	0.000129049	0.000573553	6.01759	0.704009	-1.27119	3.93182
Gm15832	0.000714191	0.0014781	-4.80874	0.210861	1.33775	-2.18387
Gm15899	0.0146401	0.0117066	2.94578	3.13273	2.08171	2.07198
Gm15903	2.61579e-08	4.08974e-05	-15.4592	0.166709	1.84063	-3.19082
Gm15920	8.27088e-05	0.000461473	6.35757	3.90087	1.93746	3.89981
Gm15987	0.0109918	0.00945326	-3.11367	-1.4985	0.871531	-5.16954
Gm16089	0.0161855	0.0126024	2.88717	2.52557	1.24274	2.43317
Gm16286	0.00100376	0.00182416	4.58445	5.72648	4.68374	2.06013
Gm16373	0.00240968	0.00323244	4.02737	0.812246	-0.921346	3.32555
Gm16374	9.5322e-05	0.000496509	6.24782	1.95628	0.379852	2.9823
Gm16379	0.000480413	0.00116682	5.07625	1.41635	-1.98301	10.5514
Gm16380	0.000786465	0.00156382	4.74473	1.35448	-0.812698	4.49144
Gm16425	0.00114742	0.00198307	4.49756	2.20346	-0.369693	5.9511
Gm16433	0.00033425	0.000940572	5.32729	4.1103	2.97773	2.19249
Gm16523	3.05861e-05	0.000322353	-7.16263	0.837622	2.84427	-4.01849
Gm16534	0.000131596	0.000577639	-6.00292	0.661504	4.06597	-10.5888
Gm16580	0.00062663	0.00136279	4.89622	5.04292	3.36336	3.2033
Gm16638	0.000260646	0.00082561	-5.50312	0.799383	2.30642	-2.84225
Gm16845	0.0035525	0.00422487	3.78843	0.801942	-0.56638	2.5817
Gm17018	0.0016651	0.00253583	4.25921	2.36164	1.02487	2.52584
Gm17052	0.000404271	0.00105678	5.19489	1.14568	-0.89063	4.10196
Gm17060	1.78839e-05	0.000275421	7.62505	0.636485	-1.39998	4.1024
Gm17241	0.00255368	0.00337545	3.99136	1.40036	-0.199814	3.03179
Gm17251	0.0021282	0.00296599	4.10479	0.671296	-0.673783	2.54044
Gm17322	0.0570407	0.0333794	-2.15025	-0.0706422	1.40541	-2.78186
Gm17435	0.0416626	0.025967	-2.33543	0.868884	1.95902	-2.12894
Gm17494	3.95078e-05	0.000352334	6.94924	0.831705	-0.624627	2.7441
Gm17709	0.000449575	0.00112559	5.1217	1.7269	-0.801864	5.77077
Gm17828	0.000148056	0.000617936	5.91491	1.26888	-1.0981	5.15859
Gm17849	0.00292942	0.00371375	-3.9066	-0.755373	1.66058	-5.33671
Gm17873	0.00294852	0.00372748	3.9026	0.980866	-0.160716	2.20623
Gm18025	3.10298e-06	0.000192705	9.29187	0.611027	-2.37303	7.91207
Gm1821	5.98878e-05	0.000410266	6.61181	6.88825	5.32572	2.95372
Gm1840	0.000340843	0.00095238	5.31361	5.50279	3.75383	3.36116
Gm18432	0.00119454	0.00202746	4.47156	0.997473	-0.31868	2.49001
Gm1848	0.00111097	0.00194565	4.51847	2.4257	1.20007	2.33857
Gm18541	5.10818e-05	0.00038557	6.73949	1.57676	0.103771	2.77597
Gm1866	0.00144332	0.00229347	4.35011	1.24402	-0.42316	3.17593
Gm18852	0.000375264	0.00100407	-5.24652	-0.814601	2.10575	-7.57028
Gm18860	0.0109249	0.00940995	3.11726	2.4037	1.31391	2.12842
Gm18913	0.00111404	0.00194827	4.51668	2.30055	1.11397	2.27613
Gm18990	2.56053e-05	0.000307367	-7.31349	0.322348	1.7724	-2.73218
Gm19040	0.00248004	0.00329898	-4.0095	-0.218715	1.1305	-2.54773
Gm19325	0.00294085	0.0037237	-3.9042	0.738594	1.7576	-2.02652
Gm19327	0.000657269	0.00140708	-4.86421	-0.00676263	2.03109	-4.10635
Gm19605	0.000520054	0.00121478	-5.0222	1.13875	2.67572	-2.90185
Gm1966	0.00655097	0.00652361	-3.41968	0.37134	4.42369	-16.5912
Gm19680	0.00181175	0.00267212	4.20587	2.65973	1.29991	2.56652
Gm19721	6.36569e-05	0.000424123	-6.56325	1.06279	3.17612	-4.32688
Gm19810	0.000153717	0.000626429	5.88705	3.90842	2.16739	3.34274
Gm19967	0.00187294	0.00273395	-4.18494	-0.552372	1.01816	-2.97013
Gm2000	5.85035e-05	0.00040751	6.63049	7.96853	5.78434	4.54474
Gm20045	9.06485e-05	0.000483906	-6.28655	1.41346	2.99279	-2.98831
Gm20056	0.000796351	0.00157657	4.73647	1.89456	0.615084	2.42751
Gm20075	0.000557045	0.0012662	4.97559	4.94674	3.60521	2.53421
Gm20342	1.96403e-05	0.000289028	-7.54281	3.88012	5.13548	-2.38726
Gm20390	2.82518e-05	0.000312297	7.22973	4.09794	1.5942	5.67152
Gm20431	0.000314916	0.000909351	5.36913	1.01733	-4.2122	37.5184
Gm20517	0.00679196	0.00668357	-3.39817	0.0264831	1.17977	-2.2242
Gm20518	0.000169702	0.000654263	-5.81397	-0.575828	1.09677	-3.18787
Gm20594	0.000306091	0.000900889	5.38915	10.3824	8.78058	3.03535
Gm20604	0.0003285	0.000928996	5.33946	2.81212	1.6573	2.22657
Gm20682	8.28086e-05	0.000461473	-6.35663	-0.580242	1.83031	-5.31679
Gm20683	0.00072901	0.00149695	-4.79507	0.834323	2.28446	-2.73233
Gm20696	2.41473e-05	0.000305558	-7.36375	2.05208	4.47406	-5.35905
Gm20705	0.000830082	0.00161814	-4.70906	-0.129276	2.25069	-5.20526
Gm21596	0.00251611	0.00333801	4.00055	5.34619	4.28174	2.09137
Gm21781	0.00110356	0.00193762	-4.5228	3.83369	5.39957	-2.96056
Gm21982	0.00343322	0.00413506	3.80928	2.21099	1.12231	2.12679
Gm21985	0.0568087	0.0332822	-2.15266	-3.50169	-0.958522	-5.82867
Gm21994	0.0166556	0.0128701	2.87046	1.42498	0.186945	2.35878
Gm22068	0.00737671	0.00706439	3.34908	6.55205	5.12949	2.68062
Gm2223	0.000888734	0.00168556	4.66411	6.03023	4.6372	2.6263
Gm2225	7.10908e-05	0.000438398	6.47596	6.17772	4.24796	3.80992
Gm22317	0.00908093	0.00820781	3.22609	6.56925	5.16136	2.6535
Gm22442	0.00107618	0.00190214	-4.53911	-2.44833	1.69133	-17.6264
Gm22486	0.0125831	0.0104683	3.03436	2.71175	1.21486	2.82235
Gm22513	0.000899626	0.00169808	4.65611	7.00479	-1.14214	283.445
Gm2260	0.00106075	0.00188493	4.54849	1.61839	-1.31594	7.64405
Gm22634	0.00689323	0.00674774	3.38936	6.60091	5.15468	2.72495
Gm23238	0.00794283	0.00743626	3.30525	6.53226	5.10002	2.69866
Gm23444	0.00829177	0.0076815	3.2798	4.0122	2.33246	3.2037
Gm23472	0.00476391	0.00519588	3.61053	4.37386	2.74069	3.10193
Gm23804	0.024019	0.0169452	2.65709	9.43493	8.19785	2.3572
Gm23849	0.0137344	0.0111598	2.98311	7.8457	6.51616	2.51322
Gm2395	0.00292537	0.00371001	3.90745	1.2136	0.00628075	2.30908
Gm24119	0.0357277	0.0230901	2.42544	4.40742	3.03563	2.58791
Gm2423	0.00185904	0.00271965	4.18963	3.74721	2.27213	2.78
Gm24305	0.0103749	0.00906799	3.14762	7.51439	6.08912	2.68565
Gm24407	0.0842951	0.0452489	1.9165	4.7685	3.75585	2.01762
Gm2445	0.000201198	0.000714044	5.68948	1.37091	-0.264274	3.10628
Gm2446	0.0013914	0.00224193	4.37353	0.523572	-0.818534	2.53521
Gm24497	0.0252741	0.0176365	2.62741	7.36738	5.94212	2.68562
Gm2451	0.000288682	0.000873903	5.43052	3.53912	1.87965	3.15901
Gm24616	0.00441568	0.00494225	3.65635	1.68334	0.0540188	3.09367
Gm24924	0.00827512	0.00766966	3.28099	6.5622	5.15747	2.64769
Gm24950	0.0236964	0.0167892	2.66497	9.32687	8.06846	2.39233
Gm25360	0.0108451	0.00935543	3.12156	4.32248	2.22875	4.2685
Gm25679	0.00779221	0.00733327	3.31659	6.56764	5.1625	2.64843
Gm2573	0.000363367	0.00098016	5.26893	0.698292	-0.50689	2.30566
Gm2574	4.86622e-05	0.000378625	6.77877	3.59244	1.94693	3.1286
Gm25939	0.0720069	0.0400039	2.01139	6.07149	4.90652	2.24229
Gm2606	9.25522e-05	0.000489668	6.27052	4.208	2.34864	3.62846
Gm26130	0.00494572	0.0053437	3.58797	2.85666	-0.0709808	7.60863
Gm2614	6.60099e-05	0.000429262	6.53448	5.30729	3.4629	3.59101
Gm26232	0.018111	0.0137147	2.8216	8.44543	6.43091	4.04047
Gm26244	0.00687911	0.00673891	3.39058	6.57206	5.14599	2.68715
Gm26316	0.00138153	0.00223693	4.37808	1.37524	-0.774956	4.43887
Gm26444	0.00700049	0.00680918	3.38018	6.55401	5.13534	2.67338
Gm26493	0.000378496	0.00100932	5.24055	1.74982	-0.695773	5.44748
Gm26514	5.82961e-05	0.00040751	-6.63332	1.28633	2.96651	-3.20467
Gm26551	0.000487998	0.00117301	-5.06555	3.1981	6.34006	-8.82719
Gm26601	0.0571744	0.0334324	-2.14886	-1.00578	1.10256	-4.31194
Gm26621	0.038211	0.0242464	-2.38612	1.51828	2.7968	-2.4259
Gm26624	0.000782811	0.00156072	-4.74782	-0.941376	2.20609	-8.86099
Gm26740	0.00228367	0.00311173	-4.06079	0.54002	3.76276	-9.33558
Gm26870	3.05934e-05	0.000322353	7.16243	9.76635	1.66907	273.857
Gm26890	0.00247127	0.00329344	-4.0117	0.882651	2.20708	-2.50433
Gm26930	1.21732e-05	0.000260043	-7.96967	3.3193	6.28272	-7.7997
Gm27219	0.00276744	0.00356664	3.94166	3.69928	2.54513	2.22553
Gm28042	0.0502492	0.0301524	-2.22521	0.199416	1.32301	-2.17889
Gm28151	0.00225209	0.00308349	-4.06947	-0.0702625	1.43071	-2.83034
Gm28373	0.0179086	0.0136159	-2.82815	0.940979	1.97011	-2.0408
Gm28437	0.00176684	0.00263029	4.22171	11.7713	10.6763	2.13606
Gm28438	0.0006934	0.00144777	4.82844	8.54945	7.26015	2.44409
Gm28661	0.00012823	0.000571188	6.02237	10.8678	9.7622	2.1519
Gm28693	0.00288906	0.00367989	-3.91514	0.745336	2.37242	-3.08888
Gm28791	1.1976e-05	0.000257752	-7.98455	0.510451	1.85268	-2.53544
Gm28875	0.000247377	0.000798467	-5.54045	0.0726177	2.11571	-4.12129
Gm28900	2.62778e-05	0.000307996	7.29135	0.469574	-2.00028	5.53988
Gm29036	0.00169128	0.00256099	-4.24934	-0.0150925	1.04374	-2.08324
Gm29216	0.00189541	0.00275573	4.17744	11.0078	9.99033	2.02437
Gm29257	4.4412e-05	0.000360048	6.85317	0.777572	-1.1698	3.8567
Gm29488	0.00348643	0.00416874	-3.79989	0.911699	1.92522	-2.01883
Gm2962	0.0123691	0.0103175	3.04441	2.12734	0.813978	2.4852
Gm29718	0.0348622	0.0226475	2.43978	-0.267416	-1.98285	3.28397
Gm2986	0.00401294	0.00461765	3.71427	1.5203	-0.19824	3.29103
Gm2991	0.00014902	0.000619359	5.91008	1.92913	-0.041803	3.92022
Gm2996	0.00107186	0.0018982	4.54172	1.81731	-0.334332	4.44333
Gm2a	0.00739307	0.00707493	3.34777	4.22949	3.00356	2.33906
Gm3081	0.000287732	0.000873903	-5.43286	1.48793	2.87792	-2.62077
Gm31718	0.00539763	0.00568875	-3.53544	-4.21768	-2.64448	-2.97565
Gm3219	3.5504e-05	0.000336681	7.03778	2.612	0.535479	4.21788
Gm3222	0.00069729	0.00145513	4.82471	1.51865	-0.271241	3.45788
Gm32220	0.0101735	0.00892732	-3.15915	-4.6479	-2.56939	-4.2237
Gm3226	0.0031136	0.00386968	3.86912	5.23808	3.64859	3.00943
Gm3272	0.000204149	0.000717857	5.67891	3.53495	1.83177	3.25616
Gm33378	0.000192596	0.000695681	-5.72128	0.12202	1.59092	-2.76812
Gm336	0.00933283	0.00838021	-3.20995	1.25265	3.32135	-4.19507
Gm3362	1.55865e-05	0.000269263	7.74693	3.0721	1.15285	3.78227
Gm3375	0.00277001	0.00356724	3.94108	3.89013	2.22944	3.16169
Gm3379	0.00316505	0.0039177	3.85907	1.14326	-0.567248	3.27277
Gm34220	0.00110781	0.00194336	-4.52031	1.29444	2.80458	-2.84838
Gm3436	0.000143887	0.000609156	5.93617	3.18297	1.30721	3.66994
Gm35013	0.00194468	0.00280466	4.16131	0.938639	-0.220771	2.23366
Gm3531	2.00208e-05	0.000289433	7.52605	6.31522	4.48248	3.56213
Gm3534	0.000290103	0.000873903	5.42705	2.16257	0.491755	3.18394
Gm3550	9.19219e-05	0.000487632	6.27579	2.43259	0.436158	3.99012
Gm36445	0.0124388	0.0103613	-3.04112	0.204533	2.91148	-6.52937
Gm36527	3.33571e-05	0.000329699	-7.08982	1.67945	2.85448	-2.25799
Gm36638	1.25445e-05	0.000261606	-7.94233	0.600901	2.71812	-4.33855
Gm36931	3.2531e-05	0.000326405	-7.11082	4.92073	8.08539	-8.9672
Gm36932	2.08973e-06	0.000159677	-9.7052	-0.163234	2.20906	-5.17763
Gm36933	0.000141845	0.000603423	-5.94682	1.27818	4.68842	-10.6313
Gm36940	0.0126521	0.0105107	-3.03116	0.0686613	1.30534	-2.35655
Gm36948	0.00856704	0.007865	-3.26049	2.20528	3.28516	-2.11386
Gm37010	0.000279384	0.000858534	-5.45373	-1.32685	1.13482	-5.50855
Gm37019	0.000248301	0.000799794	-5.53778	-0.91435	0.925528	-3.5798
Gm37033	8.66992e-05	0.000471762	-6.321	2.37172	5.97912	-12.1881
Gm37042	0.000222011	0.000751384	5.6182	0.122668	-4.0832	18.4541
Gm37052	0.000161357	0.000639207	-5.85115	1.10874	2.21653	-2.15516
Gm37065	0.000434159	0.00110227	-5.14569	2.25007	3.54436	-2.45257
Gm37082	0.000234358	0.000775341	-5.57923	1.57158	3.51586	-3.84843
Gm37084	0.0226123	0.0162294	-2.69225	1.66334	2.84257	-2.26456
Gm37094	0.0705959	0.039341	-2.02325	0.168133	1.70137	-2.89434
Gm37101	0.000775603	0.00155251	-4.75394	0.707233	1.98757	-2.42896
Gm37105	0.00485755	0.00527629	-3.5988	0.93971	2.3304	-2.62205
Gm37115	0.00209344	0.00293401	-4.11509	1.12964	2.24365	-2.16446
Gm37123	0.000677381	0.00142871	-4.84405	1.04465	2.0854	-2.05731
Gm37124	2.41439e-05	0.000305558	-7.36386	2.53461	5.53208	-7.98602
Gm37139	0.00291357	0.00370106	-3.90994	1.19885	2.60711	-2.65417
Gm37159	0.00140456	0.00225578	-4.36751	0.0883459	2.38282	-4.90574
Gm37164	0.00765596	0.00724624	3.32704	1.5869	0.333197	2.38452
Gm37176	9.92046e-05	0.000507266	-6.21717	2.13433	4.51738	-5.21637
Gm37183	0.0017533	0.00261699	-4.22657	0.488883	1.74436	-2.38746
Gm37186	0.000391403	0.00103678	-5.21729	1.20426	3.32205	-4.34028
Gm37204	0.000597185	0.00132338	-4.9286	1.55764	3.61603	-4.1652
Gm37206	0.000429215	0.00109182	-5.15357	3.23585	4.60088	-2.57583
Gm37212	0.000825141	0.00161346	-4.713	-1.98382	1.36546	-10.1914
Gm37216	0.000156779	0.000632324	-5.87244	-0.499975	1.22655	-3.3093
Gm37233	0.0303863	0.020391	-2.52002	0.608005	4.34199	-13.3058
Gm37248	1.55352e-05	0.000269263	-7.74987	4.1332	7.565	-10.7913
Gm37255	0.000392543	0.00103819	-5.21527	0.510572	2.06532	-2.93781
Gm37262	0.000809795	0.00159391	-4.7254	0.895934	2.42561	-2.88721
Gm37266	2.12333e-05	0.000291928	-7.47485	2.19678	4.64831	-5.46994
Gm37274	8.4705e-05	0.000464864	-6.33904	1.59739	3.54947	-3.86935
Gm37285	4.38232e-05	0.000359155	-6.86408	1.15734	2.72581	-2.96589
Gm37296	0.0299499	0.0201765	-2.52846	2.3567	3.42865	-2.10227
Gm37298	8.40929e-06	0.000233657	-8.31198	5.11485	7.8624	-6.71576
Gm37303	0.000132158	0.000578314	-5.99972	1.04448	2.82028	-3.42427
Gm37320	0.055109	0.0324876	-2.17065	0.77677	2.06164	-2.43659
Gm37321	0.000585946	0.00130924	-4.94141	-0.0333289	1.46303	-2.8213
Gm37334	0.000220417	0.000747994	-5.6234	-2.59553	-0.110844	-5.5971
Gm37370	0.000777684	0.00155544	-4.75217	0.418881	1.79644	-2.59828
Gm37382	0.00858151	0.00787409	-3.25949	-0.425036	1.94299	-5.16234
Gm37390	0.000136803	0.00059019	-5.97385	-0.67655	2.85063	-11.5289
Gm37409	0.000525153	0.00122264	-5.01557	-0.056688	1.80132	-3.62507
Gm37420	0.0120957	0.0101585	-3.05751	3.25408	4.50059	-2.37267
Gm37423	3.36741e-05	0.000330536	-7.08191	1.23982	2.73173	-2.8126
Gm37436	0.000501697	0.00119059	-5.04666	-0.62623	1.11374	-3.34029
Gm37470	7.48954e-05	0.000444628	-6.43502	0.998117	2.07496	-2.10942
Gm37474	0.000318308	0.000913172	-5.36159	1.43596	3.36295	-3.8026
Gm37486	0.00105563	0.00187667	4.55164	3.74438	2.39749	2.54364
Gm37488	1.53205e-05	0.000266989	-7.76229	3.32838	4.50604	-2.2621
Gm37494	0.00596597	0.00613636	-3.4755	3.84954	4.91074	-2.08667
Gm37499	0.000101282	0.0005094	-6.2013	0.527388	1.70864	-2.26773
Gm37509	0.00266448	0.0034711	-3.96508	-0.184909	1.39834	-2.99645
Gm37510	0.000344221	0.000958449	-5.30671	1.3579	3.68068	-5.00292
Gm37522	5.26611e-05	0.000393584	-6.71492	1.07214	2.44264	-2.5856
Gm37529	0.000105124	0.000518873	-6.17284	-2.24755	0.99455	-9.46172
Gm37531	0.0548652	0.0323571	-2.17328	0.299344	1.63433	-2.52273
Gm37534	2.97921e-06	0.000190926	-9.33375	5.49252	8.30154	-7.00806
Gm37553	0.00125535	0.00208525	-4.43956	1.09796	2.74139	-3.12407
Gm37558	6.81129e-05	0.00043417	-6.50969	2.81634	3.86796	-2.07286
Gm3756	0.00374693	0.00438729	3.75596	1.90846	0.490504	2.67207
Gm37570	0.00102991	0.00185197	-4.56769	1.0204	2.73212	-3.2755
Gm37581	0.000147149	0.000615442	-5.91948	-0.0397453	1.60651	-3.13019
Gm37584	0.000592566	0.00131669	-4.93383	0.548171	1.89665	-2.54644
Gm37588	0.000771922	0.00154819	-4.7571	0.502422	1.66244	-2.23459
Gm37589	4.37057e-05	0.000359155	-6.86628	3.77215	5.74005	-3.91199
Gm37593	9.18153e-06	0.000236892	-8.22968	2.94236	5.50839	-5.92175
Gm37621	2.61472e-05	0.000307631	-7.2956	-0.00214941	2.98779	-7.94438
Gm37632	1.58487e-05	0.000271432	-7.73206	0.799572	3.59103	-6.92327
Gm37645	0.000132784	0.000579211	-5.99618	0.0109805	2.17137	-4.47036
Gm37653	1.74087e-06	0.000150959	-9.9012	2.26954	3.51111	-2.36457
Gm37663	0.000110618	0.000531576	-6.13405	3.27344	4.47735	-2.30363
Gm37677	0.000267795	0.000838233	-5.48384	1.79273	3.75288	-3.89101
Gm37691	0.00345556	0.00414562	-3.80532	-0.743235	1.1884	-3.81488
Gm37702	0.00469331	0.00514004	-3.61953	-0.156155	1.40638	-2.95372
Gm37706	0.00222591	0.00306394	-4.07676	-1.4398	1.6159	-8.31487
Gm37718	0.000577536	0.0012994	-4.95116	0.386769	1.66823	-2.43085
Gm37726	0.000481313	0.00116682	-5.07497	1.25905	3.00932	-3.3642
Gm37738	0.000480768	0.00116682	-5.07575	1.62762	3.41685	-3.4563
Gm37747	0.00637853	0.0064081	-3.43558	0.824963	2.3522	-2.88234
Gm37766	8.27994e-05	0.000461473	-6.35672	0.293285	2.68603	-5.25155
Gm37795	0.0442871	0.0272691	-2.29957	-1.37656	-0.0553357	-2.49879
Gm37802	0.00444912	0.00496429	-3.65179	1.17607	2.60856	-2.69913
Gm37809	0.000112927	0.000538004	-6.11836	-0.176596	0.947477	-2.17961
Gm37864	8.94879e-06	0.000235474	-8.25367	0.0511279	2.18607	-4.3922
Gm37868	0.00127024	0.00210294	-4.43197	0.184275	1.50188	-2.49252
Gm3788	0.000158759	0.000636521	5.86315	2.05654	0.335025	3.29781
Gm37893	0.000107774	0.000524781	-6.15386	0.97672	2.3704	-2.62749
Gm37906	3.84855e-05	0.000350123	-6.97089	1.80852	3.15086	-2.53561
Gm37940	0.00105281	0.00187502	-4.55338	0.548638	2.32293	-3.42069
Gm37943	0.00628792	0.00635079	-3.44411	1.54179	2.74713	-2.30592
Gm37968	1.65408e-05	0.00027256	-7.69408	-0.568082	0.693354	-2.39734
Gm37975	0.000325505	0.000923815	-5.34589	-0.581602	2.00559	-6.0093
Gm37978	0.0121264	0.0101782	-3.05603	0.69069	1.94814	-2.39072
Gm37983	7.63815e-05	0.000452294	-6.41964	1.4033	3.16579	-3.39284
Gm38014	0.00102595	0.00184789	-4.57019	-0.188626	1.39934	-3.00626
Gm38020	0.00319035	0.00393796	-3.85419	2.04228	3.08373	-2.05829
Gm38034	0.000761219	0.0015361	-4.76636	1.24954	2.82197	-2.97405
Gm38043	0.0018957	0.00275573	-4.17734	0.880421	2.83093	-3.8651
Gm38056	0.00367697	0.00433784	-3.76744	1.89938	3.98597	-4.24743
Gm38062	2.33134e-05	0.000305558	-7.39399	0.743321	3.0379	-4.9061
Gm38082	0.000980815	0.00180481	-4.59954	3.12131	5.50359	-5.21358
Gm38115	0.0171582	0.0131689	-2.85312	1.35238	2.60417	-2.38136
Gm38120	0.000158917	0.000636521	-5.86242	1.68594	3.69001	-4.01131
Gm38147	0.00184727	0.00270842	-4.19363	0.0640505	1.63101	-2.9628
Gm38190	0.0104498	0.0091194	-3.14339	1.68079	2.77232	-2.131
Gm38236	0.00111379	0.00194827	-4.51682	-0.416475	1.61467	-4.0873
Gm38257	0.00274874	0.00354715	-3.94584	1.26304	2.37692	-2.16427
Gm38292	0.00167643	0.00254552	-4.25492	0.472166	2.4307	-3.88666
Gm38336	0.00144051	0.00229129	-4.35136	0.68202	2.12355	-2.71608
Gm38346	0.000109716	0.000529053	-6.14027	1.72909	3.68771	-3.88691
Gm38357	0.00498156	0.00537208	-3.58363	0.133134	1.8067	-3.19002
Gm38365	8.23543e-05	0.000461473	-6.36091	1.02973	4.02134	-7.95362
Gm38372	0.000826782	0.0016157	-4.71169	2.38953	3.68545	-2.45533
Gm38374	0.000270467	0.000842758	-5.47677	0.647784	2.23922	-3.0135
Gm38375	3.33397e-06	0.000192705	-9.21837	1.23456	2.89801	-3.16773
Gm38377	0.00337552	0.0040878	-3.81964	1.09503	3.04962	-3.87605
Gm38380	4.39096e-05	0.000359155	-6.86247	0.724329	2.55207	-3.54981
Gm38387	0.000215079	0.000741825	-5.64111	1.51002	3.44054	-3.81192
Gm3839	7.23182e-05	0.000440037	6.4625	2.66707	0.672696	3.98444
Gm39041	0.000607045	0.00134	-4.91757	0.430028	2.33901	-3.75544
Gm40309	0.000275852	0.000849653	-5.46276	0.891533	2.69867	-3.49946
Gm4070	0.0119999	0.0101016	-3.06217	2.51457	4.44657	-3.81585
Gm4076	7.74396e-05	0.00045415	6.40888	6.61509	5.24427	2.58618
Gm4130	0.00164081	0.00250653	4.26853	4.18266	3.16185	2.02905
Gm4149	8.38267e-05	0.000462338	6.34713	6.61802	4.69374	3.79547
Gm4202	0.00106685	0.00189408	4.54477	6.2687	5.19618	2.1031
Gm4204	1.24378e-05	0.000261606	7.9501	7.09465	5.27101	3.53973
Gm42047	0.0270053	0.0185706	-2.58881	0.992375	4.03743	-8.25375
Gm42141	0.00035401	0.000972752	-5.28713	0.674117	2.75553	-4.23222
Gm42372	0.0064453	0.00645234	-3.42937	0.694262	2.23061	-2.90059
Gm42462	0.00583501	0.00604326	3.48877	1.30371	0.182573	2.17519
Gm42514	0.00498225	0.00537208	-3.58355	-1.18674	0.140407	-2.50905
Gm42515	5.28489e-05	0.000393584	-6.71205	0.396914	1.65577	-2.39306
Gm42548	0.0173122	0.0132462	-2.8479	1.5741	2.95671	-2.60739
Gm42549	0.0130317	0.0107359	-3.01385	2.30997	3.67885	-2.58271
Gm42559	0.000169242	0.000654263	-5.81597	0.621297	2.34197	-3.29591
Gm42571	0.00243702	0.0032581	-4.02037	0.456345	2.35287	-3.72315
Gm42576	8.17189e-05	0.000461473	-6.36693	1.00372	2.90794	-3.74307
Gm4258	2.29146e-05	0.000305558	-7.40887	3.66147	5.92733	-4.80943
Gm42611	0.00200746	0.0028564	-4.14137	1.12315	2.98338	-3.63065
Gm42658	0.000232573	0.00077136	-5.58473	-0.0302558	1.49952	-2.8874
Gm42659	0.000191223	0.000693241	-5.7265	1.0914	2.31164	-2.32987
Gm42701	0.00122357	0.00204873	-4.45607	-0.289147	1.84969	-4.40408
Gm42702	0.000804864	0.00158788	-4.72944	0.226707	2.54854	-4.99968
Gm42728	0.0159528	0.0124726	-2.89562	0.0755978	1.33765	-2.39836
Gm42743	0.0143205	0.0115089	2.95868	6.93916	5.79799	2.2056
Gm42819	0.000533126	0.001233	-5.00533	-0.261133	1.72412	-3.95933
Gm42820	0.000980146	0.00180481	-4.59998	-0.649577	0.600932	-2.37925
Gm42856	0.00014487	0.000611707	-5.93109	1.27089	2.64413	-2.59051
Gm42866	0.00558661	0.00584452	-3.51481	-0.349774	1.59545	-3.85096
Gm42869	6.87076e-05	0.00043417	-6.50283	1.24301	2.65359	-2.65845
Gm42878	0.0506395	0.0303206	-2.22064	-0.129148	0.948061	-2.10995
Gm42907	0.000317974	0.000913085	-5.36233	0.703293	1.79974	-2.13828
Gm42908	0.00414389	0.00472727	-3.6948	-1.02025	0.129587	-2.21889
Gm42930	0.00192246	0.0027807	-4.16853	0.22308	1.52786	-2.47045
Gm4294	0.000495289	0.00118195	5.05543	6.38256	4.35704	4.0714
Gm42979	0.00139142	0.00224193	-4.37352	1.03112	2.5701	-2.90589
Gm42986	0.000670865	0.00142315	-4.85051	1.17518	2.77616	-3.03349
Gm43009	0.00459551	0.00507067	-3.63224	0.040478	1.89801	-3.62387
Gm43010	0.00217921	0.00301592	-4.08999	0.686306	2.46457	-3.43012
Gm43011	9.86156e-05	0.000506898	-6.22174	1.55245	3.12044	-2.96491
Gm43024	7.98288e-05	0.000460329	-6.38516	0.327826	2.081	-3.37099
Gm43028	8.10112e-05	0.000461473	6.3737	1.87499	-0.402102	4.847
Gm43039	0.000457293	0.0011308	-5.11002	-0.201135	1.11337	-2.48717
Gm43051	0.00111022	0.00194565	-4.51891	0.442682	2.43182	-3.97
Gm43052	0.00103535	0.00185557	-4.56426	-0.0378961	2.41882	-5.48965
Gm43059	4.91495e-05	0.00038142	-6.77069	-0.38602	1.43902	-3.54317
Gm43061	0.00838619	0.00774729	-3.2731	0.356968	1.76104	-2.64647
Gm43071	0.0198341	0.0146755	-2.76862	0.493118	1.62626	-2.19335
Gm43079	0.000325409	0.000923815	5.34609	0.627577	-0.505347	2.19303
Gm43080	0.000565178	0.00127593	-4.96578	-0.522108	1.44084	-3.89859
Gm43096	0.00104784	0.00187035	4.55646	2.57516	1.51684	2.0825
Gm43110	0.000577899	0.00129948	4.95074	0.796955	-0.485533	2.43258
Gm43149	0.00449971	0.00499828	-3.64496	0.409715	1.90651	-2.82215
Gm43162	0.000742426	0.00151432	-4.78295	-0.800462	1.39352	-4.57568
Gm43176	0.000686147	0.00143943	-4.83546	0.336981	1.53215	-2.28972
Gm43178	0.0250073	0.0174933	-2.6336	0.339747	1.37666	-2.05183
Gm43195	4.17207e-05	0.000358448	-6.90438	-0.785632	3.64709	-21.5965
Gm43200	0.00301328	0.00378086	-3.88924	0.845694	1.93987	-2.13491
Gm43213	0.0275939	0.0189001	-2.57624	0.957361	2.15385	-2.29181
Gm43256	0.000203981	0.000717857	-5.6795	1.13443	3.50306	-5.1645
Gm43260	0.00120619	0.00203507	-4.46529	0.584685	2.88658	-4.93105
Gm43274	0.00164863	0.00251552	-4.26551	1.13366	3.61095	-5.56852
Gm43275	0.000557036	0.0012662	-4.9756	-0.953552	1.98241	-7.65269
Gm43290	0.000136468	0.000589384	-5.97568	-1.60034	0.300044	-3.73311
Gm43302	0.0872032	0.0464504	-1.89595	-1.24238	2.61267	-14.4706
Gm43313	0.0145003	0.0116162	-2.95138	1.69675	2.70951	-2.01777
Gm4332	0.000118496	0.000551962	6.08189	7.6734	5.79148	3.68565
Gm43328	0.000186933	0.000687091	-5.74307	2.00854	3.03992	-2.04398
Gm43329	0.000309006	0.000902798	-5.38247	1.58852	3.57724	-3.96886
Gm43330	0.000670548	0.00142315	-4.85082	1.55119	3.40041	-3.60307
Gm43331	0.000223101	0.000753219	-5.61467	1.06174	2.91786	-3.62033
Gm43339	0.0073523	0.0070461	-3.35105	0.423361	1.67561	-2.38213
Gm43365	0.000364405	0.000982294	-5.26695	0.599304	1.85287	-2.38431
Gm43387	0.00265094	0.00345712	-3.96823	-0.735404	1.19202	-3.80376
Gm43421	0.000464667	0.00114038	-5.09906	1.95833	3.53361	-2.97992
Gm43430	0.00160066	0.0024643	-4.28424	1.09643	2.81249	-3.28538
Gm43442	0.0364639	0.0234211	2.41351	1.88822	0.864658	2.03293
Gm43457	1.32404e-06	0.000148567	-10.2011	0.998345	2.46491	-2.76363
Gm43462	6.89466e-05	0.00043417	-6.50009	1.97052	3.37828	-2.65326
Gm43463	3.96734e-05	0.000352334	-6.94579	-0.270866	1.52222	-3.46554
Gm43466	6.47327e-06	0.00022642	-8.56087	1.19751	2.78947	-3.01459
Gm43481	0.00449064	0.00499485	-3.64617	2.10492	3.49575	-2.62228
Gm43482	0.00204888	0.00289403	-4.12856	-0.137779	1.49483	-3.10073
Gm43499	0.0692935	0.0387565	-2.0344	-1.75592	-0.385893	-2.58475
Gm43524	0.000189059	0.000689676	5.73481	1.36022	-0.90636	4.81182
Gm43544	0.000520688	0.00121484	-5.02137	0.569839	1.84527	-2.42071
Gm43571	0.00388582	0.00450911	-3.73382	0.90535	2.49254	-3.00465
Gm43584	0.0112954	0.00964134	3.09767	1.31934	-0.105788	2.68539
Gm43633	0.000606216	0.00133891	-4.91849	-0.355079	1.88623	-4.72826
Gm4366	0.000246429	0.000797347	5.5432	7.67319	5.74179	3.81424
Gm43696	0.0106172	0.00921686	-3.13404	0.941268	2.17187	-2.34665
Gm43702	7.72666e-06	0.000229745	-8.39189	-0.487108	3.73541	-18.6683
Gm43707	9.73405e-05	0.000503602	-6.23172	-0.288049	2.59509	-7.37752
Gm43712	2.93227e-05	0.0003166	7.19823	4.50617	2.51926	3.96386
Gm4374	0.00818964	0.00761066	3.28713	1.2645	-0.037973	2.46651
Gm43747	0.0126715	0.0105198	-3.03026	1.00829	2.05681	-2.06841
Gm43753	0.00625893	0.00632956	-3.44687	0.520495	2.93634	-5.33633
Gm43769	0.000230115	0.000768009	-5.59237	-0.484387	1.64149	-4.36468
Gm43788	0.000413842	0.00106983	-5.17872	1.51402	3.74701	-4.70108
Gm43807	0.00198512	0.00284407	-4.14838	0.569583	1.67849	-2.15681
Gm43813	0.000509192	0.00120071	-5.03656	1.73669	3.02926	-2.44965
Gm43848	0.00467687	0.00513149	-3.62165	0.72412	1.9449	-2.33072
Gm43857	0.00188082	0.00274143	-4.1823	-0.00864585	1.51361	-2.87239
Gm43858	0.000801546	0.00158414	-4.73217	0.244524	1.96957	-3.30591
Gm43961	0.000417415	0.00107348	-5.17279	2.17263	3.82751	-3.14896
Gm43982	0.0265925	0.0183558	-2.59778	0.751034	2.29815	-2.92232
Gm43984	0.0140821	0.0113564	-2.96849	0.855014	2.60855	-3.37184
Gm44027	3.46488e-05	0.000334867	-7.05809	0.583938	2.65183	-4.19274
Gm44045	0.0431539	0.0267162	-2.31479	0.523642	1.8474	-2.50317
Gm44067	0.0345487	0.0224891	-2.44506	-0.396026	0.806452	-2.30135
Gm44078	0.0045717	0.00505986	-3.63537	0.0654842	1.54669	-2.79182
Gm44086	0.0167669	0.0129435	-2.86658	2.0604	3.09653	-2.05072
Gm44093	0.0299733	0.0201785	-2.528	0.122061	1.30105	-2.26418
Gm44104	0.00693335	0.00676535	-3.38591	-0.33152	3.4675	-13.9194
Gm44126	0.000121545	0.000557667	6.06269	2.53919	1.05056	2.80621
Gm44130	0.000515356	0.00121093	-5.02837	1.46592	3.10566	-3.1161
Gm44152	0.00606176	0.00620157	-3.46598	0.17784	1.75746	-2.98891
Gm44153	0.000758413	0.0015347	-4.7688	0.21209	1.92822	-3.28553
Gm44187	0.000179683	0.000674164	-5.77201	0.47034	2.35182	-3.68453
Gm44283	0.000377774	0.00100807	-5.24188	0.884518	2.20709	-2.50113
Gm44291	0.0018146	0.00267434	-4.20488	0.369433	2.43415	-4.18351
Gm44292	0.000156421	0.000631618	-5.87413	-0.0426285	1.04489	-2.12508
Gm44419	0.000339141	0.000949628	5.31712	0.173197	-2.58576	6.76908
Gm44423	0.00196524	0.00281999	-4.1547	-0.0397535	1.64075	-3.20539
Gm44434	0.000127742	0.000569731	-6.02524	1.96469	3.88696	-3.79017
Gm44567	0.00113681	0.0019716	-4.50357	1.12939	2.74797	-3.07071
Gm4459	0.000500671	0.0011905	5.04806	2.7472	1.1497	3.0262
Gm44597	9.81396e-06	0.0002422	-8.1677	1.99114	3.38787	-2.63303
Gm44639	0.00305859	0.0038238	-3.88007	0.0274186	1.51712	-2.80831
Gm44663	0.00146436	0.00231809	-4.34088	0.335705	3.13952	-6.98285
Gm44664	0.000738658	0.00151052	-4.78633	0.146829	3.18626	-8.2217
Gm44667	1.1917e-06	0.000144627	-10.3185	1.75583	4.02256	-4.81231
Gm44668	3.32244e-06	0.000192705	-9.2219	0.368834	2.9639	-6.04218
Gm44695	0.00185511	0.00271579	-4.19097	-1.02781	1.37507	-5.28856
Gm44699	0.00640693	0.00642201	-3.43293	0.139974	2.31801	-4.52538
Gm44745	0.00141264	0.00226509	-4.36384	1.63286	4.15013	-5.72495
Gm44746	0.00390379	0.00452349	-3.73102	0.614206	2.40206	-3.45301
Gm44775	0.000307635	0.000901033	-5.3856	-0.661766	0.707851	-2.58402
Gm44777	0.0137223	0.0111522	-2.98363	1.7263	2.76916	-2.06031
Gm44834	0.0056984	0.00593646	-3.50295	-1.12212	1.20094	-5.00394
Gm44860	0.0309904	0.0206846	-2.50853	-1.44062	0.59932	-4.11228
Gm44861	0.0311546	0.0207444	-2.50545	-1.95473	-0.104974	-3.60438
Gm44916	0.000221867	0.000751384	-5.61867	-0.206854	1.09662	-2.46823
Gm44937	0.000349089	0.000965239	-5.2969	-1.2973	2.32011	-12.2729
Gm44951	0.000676989	0.00142871	-4.84443	-1.47962	1.34427	-7.08071
Gm45033	6.71251e-06	0.00022642	-8.52601	-0.912112	1.3189	-4.69462
Gm45062	0.0291979	0.0197503	-2.54329	6.25481	7.57929	-2.50442
Gm45084	0.000995141	0.00181294	-4.59007	1.31689	2.94223	-3.08515
Gm4518	0.000102035	0.000510603	6.19563	0.813501	-1.06551	3.67822
Gm45191	0.00220659	0.00304321	-4.0822	2.35299	5.28216	-7.6167
Gm45206	0.00168896	0.00255866	-4.25021	-1.20124	0.827832	-4.08141
Gm45220	0.0033714	0.00408406	-3.82039	1.59666	2.98657	-2.62062
Gm45221	0.00587251	0.00606694	-3.48494	2.16737	3.33274	-2.24291
Gm45222	0.00102652	0.00184808	-4.56983	2.3268	4.17429	-3.59875
Gm45223	0.00121507	0.00204065	-4.46057	2.76628	4.64818	-3.68559
Gm45224	0.0270207	0.018578	2.58847	0.111991	-1.49575	3.04774
Gm45289	0.00113408	0.00196773	-4.50513	-0.361816	1.31005	-3.18625
Gm45292	0.00444679	0.00496309	-3.6521	0.298383	1.49689	-2.29502
Gm45294	0.000225578	0.000757009	-5.60671	0.416404	2.37259	-3.88035
Gm45342	0.000227088	0.000761431	-5.6019	-0.0522215	1.87196	-3.79521
Gm45354	0.00152711	0.00238887	-4.31414	0.285056	1.96335	-3.20049
Gm45358	6.25591e-05	0.000421302	-6.57707	0.112155	2.31248	-4.59584
Gm45360	8.87013e-05	0.00047627	-6.30333	-0.884823	1.64305	-5.76721
Gm4540	0.00465848	0.00511883	3.62402	3.92004	2.45998	2.7512
Gm45403	0.00150312	0.0023625	4.32422	1.08839	-0.269417	2.56296
Gm45407	0.00303676	0.00380273	-3.88447	-0.363382	1.49481	-3.62554
Gm45413	7.72775e-05	0.00045415	-6.41052	-0.520608	1.03598	-2.94157
Gm45477	0.000298835	0.000889564	-5.40608	2.04666	3.89633	-3.60419
Gm45493	0.00271374	0.00351683	-3.95375	1.42646	2.62123	-2.28908
Gm45534	4.13225e-05	0.000358448	-6.91226	-0.86109	1.7167	-5.97025
Gm45553	7.01241e-05	0.000436035	-6.48674	-0.548279	1.5164	-4.18341
Gm45555	0.000878821	0.00167636	-4.67148	1.38003	3.254	-3.66539
Gm45606	0.00299258	0.00376401	-3.89348	0.284232	2.57678	-4.89921
Gm45630	0.000491753	0.00117847	-5.06032	0.405731	2.1931	-3.45186
Gm45705	0.0519225	0.0309675	2.20587	1.0889	-0.276447	2.57639
Gm45716	0.00216762	0.00300353	4.09332	1.93694	0.172569	3.39727
Gm45718	0.000197334	0.000707011	-5.70358	0.99475	2.4798	-2.79926
Gm45762	0.00289053	0.00367992	-3.91483	1.50772	2.83738	-2.51344
Gm45779	0.0018825	0.00274208	-4.18174	2.20315	3.49125	-2.44206
Gm45797	3.4112e-05	0.000332202	-7.07112	0.0952614	1.86871	-3.4187
Gm45884	0.00615757	0.00626853	-3.45661	2.19599	4.28376	-4.25091
Gm4596	0.00616233	0.00627092	3.45615	3.30308	2.23094	2.10255
Gm4609	0.00012019	0.000553367	6.07116	3.34842	1.49028	3.62539
Gm4613	0.00357044	0.00423549	3.78536	1.03102	-1.09573	4.36733
Gm4617	0.000254551	0.000815001	5.52001	7.56741	5.87291	3.23665
Gm46218	0.00104507	0.00186626	-4.55817	0.629151	2.07172	-2.71804
Gm46436	0.000273067	0.000846117	-5.46997	-0.636464	1.07255	-3.26937
Gm46496	0.00691223	0.00675702	3.38772	0.92728	-0.745707	3.18874
Gm46522	1.88679e-06	0.000152997	9.81442	0.796324	-1.55375	5.09849
Gm4654	2.70447e-05	0.00030971	7.26683	2.17659	0.335368	3.58313
Gm4691	8.21693e-05	0.000461473	6.36266	1.58537	-0.395505	3.94733
Gm47015	0.00204218	0.00288799	4.13062	5.65045	3.16698	5.59241
Gm47021	0.00128988	0.00212749	4.4221	2.82196	1.25057	2.97192
Gm4705	0.00149012	0.00234979	4.32976	0.741318	-1.19675	3.83191
Gm47087	4.9333e-08	4.08974e-05	-14.4713	1.26807	4.72517	-10.9823
Gm47138	0.000530648	0.00123074	-5.0085	0.356273	2.35288	-3.9906
Gm47139	0.000879674	0.0016764	-4.67085	-0.0859808	1.71817	-3.49224
Gm47166	0.000824624	0.00161346	-4.71341	-0.00403275	1.80223	-3.49735
Gm47218	9.12779e-05	0.000485512	-6.28121	0.394236	1.46836	-2.10545
Gm47246	0.000686971	0.00143964	-4.83466	0.0877981	1.12385	-2.05061
Gm47258	6.80333e-05	0.00043417	-6.51061	0.750255	2.13166	-2.60522
Gm47283	0.0485447	0.0293315	2.24555	3.9343	2.33041	3.03962
Gm47324	0.00177353	0.00263729	-4.21932	-1.21985	0.723949	-3.84717
Gm4735	0.0032687	0.00399866	3.83932	6.18443	4.67702	2.84299
Gm4737	1.28842e-05	0.00026204	7.91809	5.82608	3.80083	4.07061
Gm4740	0.000130166	0.000574637	6.01112	1.29776	-0.584631	3.68685
Gm47483	0.000592994	0.00131669	-4.93335	2.27549	3.34453	-2.09804
Gm47503	0.00172089	0.00258912	-4.23836	-0.297029	1.37038	-3.17642
Gm4754	0.000179229	0.000674164	5.77386	3.84501	2.30373	2.91052
Gm47558	0.000264543	0.000830924	-5.49254	-0.0693949	1.19134	-2.39619
Gm47580	0.00108732	0.00191672	-4.53242	-0.424479	1.33903	-3.39522
Gm47585	0.0145915	0.0116725	-2.94772	0.517783	1.68158	-2.24047
Gm4759	0.00856232	0.00786248	-3.26081	1.03883	5.23042	-18.2725
Gm47652	0.000994483	0.00181294	-4.5905	-0.067261	1.04267	-2.15835
Gm47657	2.3644e-05	0.000305558	-7.38186	0.329695	2.04489	-3.28341
Gm47664	3.92822e-05	0.000352334	-6.95397	0.243381	2.43652	-4.573
Gm47665	0.000351562	0.000970051	-5.29197	0.67019	1.93687	-2.40608
Gm47690	0.0163733	0.0127108	-2.88044	0.830233	1.9393	-2.15705
Gm47798	0.00370369	0.0043545	-3.76303	0.812765	2.23495	-2.67992
Gm47817	0.00499641	0.00538152	-3.58184	0.282992	1.73085	-2.72803
Gm47826	0.000289491	0.000873903	-5.42854	0.633818	2.23268	-3.02904
Gm4784	0.000264337	0.000830924	5.4931	2.9864	1.20471	3.43829
Gm4787	0.00235108	0.00317526	-4.04268	-0.202403	1.75078	-3.87228
Gm47963	0.00143612	0.00228888	-4.35331	1.27422	2.58552	-2.48166
Gm4798	0.000156054	0.000631618	5.87587	2.64664	-2.02821	25.5428
Gm47980	0.000406279	0.00105994	5.19147	1.61956	-0.859878	5.57682
Gm4799	0.0016114	0.0024746	4.28	3.16739	1.81549	2.55249
Gm4800	0.000282895	0.000865974	5.44487	1.76404	0.560531	2.30299
Gm48027	0.00054171	0.00124276	-4.9945	1.68348	3.06633	-2.60782
Gm48062	0.000381188	0.00101514	-5.23563	0.321755	1.8769	-2.93863
Gm4811	0.000537324	0.00123696	5.00001	2.4857	1.43625	2.06974
Gm48114	5.87787e-05	0.00040751	-6.62673	-1.52262	1.74808	-9.65113
Gm48138	8.22956e-07	0.000130795	-10.7403	-0.117352	1.59688	-3.28123
Gm48139	3.47942e-06	0.000192705	-9.17487	0.564564	2.43542	-3.65749
Gm48151	0.00106835	0.00189505	4.54385	1.76486	0.239775	2.87803
Gm48194	9.80631e-05	0.000506023	-6.22605	-0.343138	1.15247	-2.81984
Gm48225	0.000182289	0.00067945	-5.76146	0.0424009	2.4856	-5.43845
Gm48230	0.0588685	0.0342015	-2.13154	-1.81095	-0.279831	-2.8901
Gm48314	0.0107867	0.00930914	-3.12473	1.13557	2.73497	-3.03017
Gm48381	0.0201143	0.0148317	-2.76045	-0.198553	1.09928	-2.45859
Gm48382	0.0603825	0.0348974	-2.11646	0.000712287	1.02571	-2.03496
Gm48442	0.00637224	0.00640663	-3.43617	0.228302	2.50175	-4.83479
Gm48478	0.000138905	0.000595377	-5.96246	-0.126811	1.17181	-2.45994
Gm48569	0.000318773	0.000913531	-5.36057	0.0577418	2.70335	-6.25758
Gm48583	0.000313704	0.000906509	5.37184	4.15222	1.77125	5.20888
Gm48624	0.000632148	0.00137253	-4.89034	1.06538	2.70649	-3.11906
Gm48627	4.76878e-05	0.000375951	-6.79519	0.109988	1.40602	-2.45552
Gm48673	7.83957e-05	0.000456734	-6.39929	-0.483411	1.7754	-4.78596
Gm48706	0.00174168	0.00260455	-4.23077	-0.148703	2.23413	-5.21559
Gm48766	0.000501907	0.00119059	-5.04638	0.52473	2.60843	-4.23894
Gm48870	0.0498837	0.0300128	-2.22951	-0.245103	2.01938	-4.80482
Gm48885	0.0158961	0.0124445	-2.8977	-0.0183641	1.41264	-2.69634
Gm48904	0.0073901	0.00707379	-3.34801	0.449135	1.67609	-2.34073
Gm48909	0.000208756	0.000729033	5.66272	2.07796	0.100667	3.93754
Gm4900	0.000151821	0.000621894	5.89625	4.03019	2.91403	2.16769
Gm49125	0.0131521	0.0108008	-3.00846	0.639186	1.74944	-2.15884
Gm49308	0.00441756	0.00494249	-3.65609	1.11184	2.56166	-2.73174
Gm49342	0.0101836	0.00893223	3.15856	0.820336	-0.866697	3.21994
Gm49383	0.000264254	0.000830924	5.49332	2.46828	1.27069	2.29355
Gm49384	0.000535263	0.00123578	5.00262	1.84985	0.49568	2.5565
Gm49396	1.69436e-05	0.00027256	-7.67276	2.07644	3.5922	-2.85949
Gm4950	0.00168444	0.0025555	4.2519	2.94833	1.40102	2.9227
Gm49553	0.0136219	0.0111047	-2.98793	2.42594	3.89686	-2.77199
Gm4963	0.00129987	0.00214041	4.41715	1.35433	-0.52937	3.69021
Gm4973	0.00536588	0.0056658	3.53898	1.98559	0.906034	2.11339
Gm4977	0.000453246	0.00112627	5.11612	0.456339	-1.52564	3.95035
Gm4987	1.24942e-05	0.000261606	7.94599	1.59257	-1.20112	6.934
Gm5045	0.000692368	0.00144694	4.82943	3.37922	1.76713	3.05694
Gm5134	0.0881071	0.0467957	-1.88969	-0.179956	0.854614	-2.0485
Gm5138	0.000208119	0.000727928	5.66493	3.49523	1.78961	3.26169
Gm5182	0.000177356	0.000669389	5.78156	5.37381	3.81929	2.93737
Gm5191	0.00883191	0.00804681	3.2425	0.691014	-0.391378	2.11754
Gm5256	0.00241212	0.00323462	4.02674	1.7946	0.267499	2.88207
Gm5297	0.00103202	0.00185378	4.56635	3.4224	2.41946	2.00409
Gm5391	0.000586191	0.00130924	4.94113	1.54008	-0.390058	3.81091
Gm5421	0.00191506	0.00277527	4.17095	4.05889	2.84403	2.32118
Gm5422	0.00595472	0.00613033	3.47663	4.06591	3.01119	2.07732
Gm5424	0.00583616	0.00604326	3.48865	3.18821	1.70009	2.80523
Gm5425	5.61357e-05	0.000403338	6.66356	3.56314	0.703593	7.25789
Gm5436	0.0004166	0.00107348	5.17414	4.13183	2.49432	3.11128
Gm5451	0.00220976	0.00304653	4.0813	0.872852	-2.07712	7.72736
Gm5452	0.000864427	0.00165601	4.68235	3.60512	1.71487	3.70698
Gm5453	0.00125775	0.00208662	4.43832	1.29516	-1.00115	4.91201
Gm5456	0.012369	0.0103175	3.04442	1.88912	0.583283	2.47227
Gm5472	0.00016575	0.000645812	5.83133	0.646134	-1.31273	3.88756
Gm5499	0.00320626	0.00394657	3.85114	2.37138	1.3566	2.0206
Gm5510	0.00909539	0.00821715	3.22515	0.441997	-0.926986	2.58288
Gm5518	0.00639914	0.00642138	3.43365	2.91181	1.797	2.16566
Gm5525	0.000223513	0.000753899	5.61334	3.73486	1.95116	3.44308
Gm5527	0.00135102	0.00220044	4.39239	2.00115	0.775576	2.33849
Gm5529	0.00133599	0.00218499	4.39956	3.49053	2.11269	2.59879
Gm5537	0.00346552	0.0041525	3.80356	5.61115	4.09481	2.86064
Gm5540	0.0299658	0.0201785	2.52815	1.43443	-0.133187	2.96415
Gm5555	0.000309466	0.000902798	5.38142	2.7121	1.61845	2.13413
Gm5559	0.000116234	0.0005472	6.09647	4.51042	2.81968	3.22822
Gm5560	0.00200585	0.0028564	4.14187	5.20505	3.857	2.54569
Gm5566	0.000151618	0.000621894	5.89725	2.88732	0.280145	6.09309
Gm5576	0.00191421	0.00277527	4.17123	2.29444	1.01178	2.43288
Gm5580	0.00167658	0.00254552	4.25486	2.6337	1.27112	2.57146
Gm5586	1.48865e-05	0.000266964	7.78798	2.57821	0.266756	4.96381
Gm5597	0.00607148	0.00620793	3.46502	1.16885	-1.27835	5.45355
Gm5611	0.000141999	0.000603431	5.94601	2.65006	1.02093	3.09326
Gm5616	0.000100418	0.000508145	6.20786	3.56449	1.39261	4.50608
Gm5626	5.52597e-05	0.000399937	6.67617	1.46471	-0.498955	3.90052
Gm5637	0.0838915	0.0450932	1.9194	3.70299	2.66533	2.05289
Gm5644	0.000407544	0.00106121	5.18932	3.81093	2.35682	2.73988
Gm5648	0.000317881	0.000913085	5.36254	4.85448	3.16035	3.2358
Gm5763	0.0349623	0.0226988	2.4381	2.21065	1.13446	2.10845
Gm5776	0.0186994	0.0140505	2.80296	2.14349	1.11436	2.04079
Gm5781	1.32717e-05	0.00026204	7.89127	1.21753	-1.07936	4.91399
Gm5786	0.000715155	0.00147843	4.80784	2.39731	0.432669	3.90317
Gm5801	0.000398323	0.00104536	5.20515	3.02422	1.84228	2.26882
Gm5805	5.47976e-05	0.000399924	6.68292	6.21153	4.08161	4.37694
Gm5812	1.52671e-06	0.000150959	10.0441	5.00368	2.50267	5.66085
Gm5815	0.00519207	0.00552521	-3.55875	3.73562	5.37254	-3.11
Gm5822	7.08351e-05	0.000438398	6.4788	2.10276	0.500342	3.03651
Gm5835	1.33219e-05	0.00026204	7.88786	6.98158	5.08191	3.73128
Gm5837	8.03552e-05	0.000461385	6.38004	4.36728	2.62915	3.33601
Gm5841	0.00157328	0.00243806	4.2952	3.50453	2.15136	2.55473
Gm5846	0.000769585	0.00154513	4.75911	4.04888	3.01045	2.05399
Gm5854	7.25092e-06	0.00022642	8.45226	1.43832	-0.868955	4.94949
Gm5864	0.00172883	0.00259577	4.23545	3.5329	2.36347	2.24923
Gm5869	3.5925e-05	0.000338512	7.02797	6.04738	4.08775	3.88963
Gm5873	0.0202003	0.0148717	2.75796	0.58977	-0.585241	2.25795
Gm5879	4.13354e-06	0.000202765	9.00109	2.23799	-0.190658	5.38391
Gm5903	0.000457515	0.0011308	5.10969	4.48434	3.30359	2.26694
Gm5905	9.89446e-05	0.000507266	6.21918	7.14162	5.20694	3.82293
Gm5909	0.00133493	0.00218457	4.40007	3.15156	2.11754	2.04771
Gm5910	0.000903389	0.00170278	4.65337	2.80301	0.959955	3.58769
Gm5913	0.000558374	0.00126719	4.97397	4.88743	3.48775	2.63843
Gm5921	2.29735e-05	0.000305558	7.40665	0.994792	-1.77402	6.81547
Gm5931	0.000363047	0.00098016	5.26955	4.21036	3.05732	2.22381
Gm5946	0.000698611	0.00145703	4.82344	0.899101	-0.665932	2.95884
Gm5963	0.000170591	0.000654263	5.81013	2.12718	0.348321	3.43156
[truncated: 2,517 more rows]
